# Supplementary material
Source: publisher figshare collection journal article supplement (https://tandf.figshare.com/articles/dataset/_/23274691)
Supplement: Supplementary file 1 [file 41022343]

## **Clinical Pharmacokinetic of Cefixime: A Systematic Review**

Maria Ajmal<sup>1</sup>, Ammara Zamir<sup>1</sup>, Anees ur Rehman<sup>1</sup>, Imran Imran<sup>2</sup>, Hamid Saeed<sup>3</sup>, Abdul Majeed<sup>4</sup>, Majid Aziz<sup>1</sup>, Faleh Alqahtani<sup>5</sup>, & Muhammad Fawad Rasool<sup>1\*</sup>

<sup>1</sup> Department of Pharmacy Practice, Faculty of Pharmacy, Bahauddin Zakariya University, 60800, Multan, Pakistan

<sup>2</sup> Department of Pharmacology, Faculty of Pharmacy, Bahauddin Zakariya University, 60800, Multan, Pakistan

<sup>3</sup> University College of Pharmacy, Allama Iqbal Campus, University of the Punjab, 54000, Lahore, Pakistan

<sup>4</sup> Department of Pharmaceutics, Faculty of Pharmacy, Bahauddin Zakariya University, 60800, Multan, Pakistan

<sup>5</sup> Department of Pharmacology and Toxicology, College of Pharmacy, King Saud University, Riyadh 11451, Saudi Arabia

\*Corresponding author: fawadrasool@bzu.edu.pk

Telephone:+92 3008639046

**Supplementary Table 1:** Introduction of Cefixime

|                                   |                                                                                                                                                                                                                       |
|-----------------------------------|-----------------------------------------------------------------------------------------------------------------------------------------------------------------------------------------------------------------------|
| Name of Drug:                     | Cefixime (Leggett et al. 1990).                                                                                                                                                                                       |
| Solubility in water:              | 55.11 mg/L (Abdullah et al. 2022).                                                                                                                                                                                    |
| Lipophilicity (Log P) value:      | -0.4 (Abdullah et al. 2022).                                                                                                                                                                                          |
| Chemical formula:                 | $C_{16}H_{15}N_5O_7S_2$<br>(Naqvi et al. 2011).                                                                                                                                                                       |
| Molecular weight:                 | 453.4 g/mol (Naqvi et al. 2011).                                                                                                                                                                                      |
| Physical appearance:              | White to slightly yellowish crystal or crystalline powder (Genvresse and Carbon 1993).                                                                                                                                |
| Available Dosage Forms and route: | Oral dosage forms: <ul style="list-style-type: none"><li>• Tablet, Chewable tablet (100 mg and 200 mg),</li><li>• Powder for suspension (100 mg per 5 ml),</li><li>• Capsule (400 mg) (Jabbar et al. 2021).</li></ul> |
| Pregnancy category:               | (B) (Özyüncü et al. 2010)                                                                                                                                                                                             |

|  |  |
|--|--|
|  |  |
|--|--|

**Supplementary Table 2:** Screening of articles based on title, abstract, involvement of animals, and accessibility

| Sr# | Title                                                                                                                                                                                                                       | Exclusion |
|-----|-----------------------------------------------------------------------------------------------------------------------------------------------------------------------------------------------------------------------------|-----------|
| 1   | Long SS, editor. Principles and Practice of Pediatric Infectious Disease (Third Edition). Edinburgh: W.B. Saunders; 2008. p. 1507-1618.                                                                                     | Title     |
| 2   | Waldman SA, Terzic A, Egan LJ, et al., editors. Pharmacology and Therapeutics. Philadelphia: W.B. Saunders; 2009. p. 1333-1378.                                                                                             | Title     |
| 3   | Cohen J, Opal SM, Powderly WG, editors. Infectious Diseases (Third Edition). London: Mosby; 2010. p. I-1-I-72.                                                                                                              | Title     |
| 4   | Finch RG, Greenwood D, Norrby SR, et al., editors. Antibiotic and Chemotherapy (Ninth Edition). London: W.B. Saunders; 2011. p. 861-900.                                                                                    | Title     |
| 5   | Kester M, Karpa KD, Vrana KE, editors. Elsevier's Integrated Review Pharmacology (Second Edition) (Second Edition). Philadelphia: W.B. Saunders; 2012. p. 235-245.                                                          | Title     |
| 6   | Wolverton SE, editor. Comprehensive Dermatologic Drug Therapy (Third Edition). London: W.B. Saunders; 2013. p. 793-826.                                                                                                     | Title     |
| 7   | 2 - Spezielle Arzneimitteltherapie in der Schwangerschaft. In: Schaefer C, Spielmann H, Vetter K, et al., editors. Arzneimittel in Schwangerschaft und Stillzeit (Achte Ausgabe). Munich: Urban & Fischer; 2012. p. 33-574. | Title     |

|    |                                                                                                                                                                                                                                                                                                                                                         |          |
|----|---------------------------------------------------------------------------------------------------------------------------------------------------------------------------------------------------------------------------------------------------------------------------------------------------------------------------------------------------------|----------|
| 8  | Alcaide B, Aragoncillo C, Almendros P. 2.02 - Cephalosporins. In: Katritzky AR, Ramsden CA, Scriven EFV, et al., editors. <i>Comprehensive Heterocyclic Chemistry III</i> . Oxford: Elsevier; 2008. p. 111-171.                                                                                                                                         | Title    |
| 9  | Garbis H, van Tonningen MR, Reuvers M. 2.6 - Anti-infective agents. In: Schaefer C, Peters P, Miller RK, editors. <i>Drugs During Pregnancy and Lactation (Second Edition)</i> . Oxford: Academic Press; 2007. p. 123-177.                                                                                                                              | Title    |
| 10 | García-Estrada C, Martín JF. 3.24 - Penicillins and Cephalosporins. In: Moo-Young M, editor. <i>Comprehensive Biotechnology (Second Edition)</i> . Burlington: Academic Press; 2011. p. 255-268.                                                                                                                                                        | Title    |
| 11 | García-Estrada C, Martín JF. 3.24 - Penicillins and Cephalosporins☆. In: Moo-Young M, editor. <i>Comprehensive Biotechnology (Third Edition)</i> . Oxford: Pergamon; 2019. p. 283-296.                                                                                                                                                                  | Title    |
| 12 | Nord CE. 4 - Effect of Antimicrobials on Human Flora. In: Finegold SM, George WL, editors. <i>Anaerobic Infections in Humans</i> : Academic Press; 1989. p. 55-80.                                                                                                                                                                                      | Title    |
| 13 | Anaya J, Sánchez RM. 4 - Four-membered ring systems. In: Gribble GW, Joule JA, editors. <i>Progress in Heterocyclic Chemistry</i> . Vol. 33: Elsevier; 2021. p. 53-91.                                                                                                                                                                                  | Title    |
| 14 | Kester M, Karpa KD, Vrana KE. 4 - Treatment of Infectious Diseases. In: Kester M, Karpa KD, Vrana KE, editors. <i>Elsevier's Integrated Review Pharmacology (Second Edition) (Second Edition)</i> . Philadelphia: W.B. Saunders; 2012. p. 41-78.                                                                                                        | Title    |
| 15 | Greenwood D, Irving WL. 5 - Antimicrobial agents. In: Greenwood D, Barer M, Slack R, et al., editors. <i>Medical Microbiology (Eighteenth Edition)</i> . Edinburgh: Churchill Livingstone; 2012. p. 54-68.                                                                                                                                              | Title    |
| 16 | Adam D, Hostalek U, Tröster K. 5-day therapy of bacterial pharyngitis and tonsillitis with cefixime. Comparison with 10 day treatment with penicillin V. Cefixime Study Group [Clinical Trial; Comparative Study; English Abstract; Journal Article; Multicenter Study; Randomized Controlled Trial]. <i>Klinische Padiatrie</i> . 1996;208(5):310-313. | Abstract |

|    |                                                                                                                                                                                                                                                        |       |
|----|--------------------------------------------------------------------------------------------------------------------------------------------------------------------------------------------------------------------------------------------------------|-------|
| 17 | Artursson P, Neuhoff S, Matsson P, et al. 5.11 - Passive Permeability and Active Transport Models for the Prediction of Oral Absorption. In: Taylor JB, Triggle DJ, editors. Comprehensive Medicinal Chemistry II. Oxford: Elsevier; 2007. p. 259-278. | Title |
| 18 | Pucci MJ, Callebaut C, Cathcart A, et al. 5.17 - Recent Epidemiological Changes in Infectious Diseases. In: Chackalamannil S, Rotella D, Ward SE, editors. Comprehensive Medicinal Chemistry III. Oxford: Elsevier; 2017. p. 511-552.                  | Title |
| 19 | Khan NU, Miao T, Ju X, et al. 6 - Carrier-mediated transportation through BBB. In: Gao H, Gao X, editors. Brain Targeted Drug Delivery System: Academic Press; 2019. p. 129-158.                                                                       | Title |
| 20 | Sparreboom A, Evans WE, Baker SD. 6 - Chemotherapy in the Pediatric Patient. In: Orkin SH, Fisher DE, Look AT, et al., editors. Oncology of Infancy and Childhood. Philadelphia: W.B. Saunders; 2009. p. 173-207.                                      | Title |
| 21 | Bradley JS. 7 - Antimicrobial Chemoprophylaxis. In: Long SS, Prober CG, Fischer M, editors. Principles and Practice of Pediatric Infectious Diseases (Fifth Edition): Elsevier; 2018. p. 71-79.e2.                                                     | Title |
| 22 | Lai Y. 7 - Organic anion, organic cation and zwitterion transporters of the SLC22 and SLC47 superfamily (OATs, OCTs, OCTNs and MATEs). In: Lai Y, editor. Transporters in Drug Discovery and Development: Woodhead Publishing; 2013. p. 455-631.       | Title |
| 23 | Iyer RN. 7.02 - Beta lactam. In: Kenakin T, editor. Comprehensive Pharmacology. Oxford: Elsevier; 2022. p. 3-63.                                                                                                                                       | Title |
| 24 | Bal AM. 7.09 - Macrolide Antibiotics. In: Kenakin T, editor. Comprehensive Pharmacology. Oxford: Elsevier; 2022. p. 170-184.                                                                                                                           | Title |
| 25 | Gerrett D. 8 - Pharmacology. In: Turner WA, Merriman LM, editors. Clinical Skills in Treating the Foot (Second Edition). Oxford: Churchill Livingstone; 2005. p. 161-191.                                                                              | Title |

|    |                                                                                                                                                                                                                                                                       |       |
|----|-----------------------------------------------------------------------------------------------------------------------------------------------------------------------------------------------------------------------------------------------------------------------|-------|
| 26 | Kim S, Michaels BD, Kim GK, et al. 8 - Systemic Antibacterial Agents. In: Wolverson SE, editor. Comprehensive Dermatologic Drug Therapy (Third Edition). London: W.B. Saunders; 2013. p. 61-97.e11.                                                                   | Title |
| 27 | Snodgrass A, Motaparthy K. 9 - Systemic Antibacterial Agents. In: Wolverson SE, editor. Comprehensive Dermatologic Drug Therapy (Fourth Edition): Elsevier; 2021. p. 69-98.e13.                                                                                       | Title |
| 28 | Rehman S, Nabi B, Ahmad S, et al. 10 - Polysaccharide-based amorphous solid dispersions (ASDs) for improving solubility and bioavailability of drugs. In: Maiti S, Jana S, editors. Polysaccharide Carriers for Drug Delivery: Woodhead Publishing; 2019. p. 271-317. | Title |
| 29 | Lawrence RM. 12 - Transmission of Infectious Diseases Through Breast Milk and Breastfeeding. In: Lawrence RA, Lawrence RM, editors. Breastfeeding (Ninth Edition). Philadelphia: Elsevier; 2022. p. 393-456.                                                          | Title |
| 30 | Best BM. 13 - Clinical Pharmacology of Anti-Infectives During Pregnancy. In: Mattison DR, editor. Clinical Pharmacology During Pregnancy: Academic Press; 2013. p. 173-199.                                                                                           | Title |
| 31 | 13th European Congress of Clinical Microbiology and Infectious Diseases. Clinical Microbiology and Infection. 2003 2003/01/01/;9:1-422.                                                                                                                               | Title |
| 32 | Craig WA, Andes DR. 21 - Cephalosporins. In: Bennett JE, Dolin R, Blaser MJ, editors. Mandell, Douglas, and Bennett's Principles and Practice of Infectious Diseases (Eighth Edition). Philadelphia: W.B. Saunders; 2015. p. 278-292.e4.                              | Title |
| 33 | Mackell SM, Anderson S. 22 - The Pregnant and Breastfeeding Traveler. In: Keystone JS, Freedman DO, Kozarsky PE, et al., editors. Travel Medicine (Third Edition). London: Elsevier; 2013. p. 219-230.                                                                | Title |
| 34 | Midtvedt T. 25 - Penicillins, cephalosporins, other beta-lactam antibiotics, and tetracyclines. In: Aronson JK, editor. Side Effects of Drugs Annual. Vol. 30: Elsevier; 2008. p. 280-296.                                                                            | Title |

|    |                                                                                                                                                                                                                                                                                                                  |       |
|----|------------------------------------------------------------------------------------------------------------------------------------------------------------------------------------------------------------------------------------------------------------------------------------------------------------------|-------|
| 35 | Scotta MC, Marostica PJC, Stein RT. 25 - Pneumonia in Children. In: Wilmott RW, Deterding R, Li A, et al., editors. Kendig's Disorders of the Respiratory Tract in Children (Ninth Edition). Philadelphia: Elsevier; 2019. p. 427-438.e4.                                                                        | Title |
| 36 | Feasey NA, Gordon MA. 25 - Salmonella Infections. In: Farrar J, Hotez PJ, Junghanss T, et al., editors. Manson's Tropical Infectious Diseases (Twenty-third Edition). London: W.B. Saunders; 2014. p. 337-348.e2.                                                                                                | Title |
| 37 | Chan KH, Abzug MJ, Liu AH. 26 - Sinusitis. In: Leung DYM, Szeffler SJ, Bonilla FA, et al., editors. Pediatric Allergy: Principles and Practice (Third Edition). London: Elsevier; 2016. p. 228-237.e3.                                                                                                           | Title |
| 38 | Imhof A, Laffer R. 26 Miscellaneous antibacterial drugs. In: Aronson JK, editor. Side Effects of Drugs Annual. Vol. 29: Elsevier; 2007. p. 253-279.                                                                                                                                                              | Title |
| 39 | Koh AY, Pizzo PA. 27 - Infectious Diseases in Pediatric Cancer. In: Orkin SH, Fisher DE, Look AT, et al., editors. Oncology of Infancy and Childhood. Philadelphia: W.B. Saunders; 2009. p. 1099-1120.                                                                                                           | Title |
| 40 | Pelton SI. 29 - Otitis Media. In: Long SS, Prober CG, Fischer M, editors. Principles and Practice of Pediatric Infectious Diseases (Fifth Edition): Elsevier; 2018. p. 216-223.e3.                                                                                                                               | Title |
| 41 | Kumar P. 33 - Pharmacology of Specific Drug Groups: Antibiotic Therapy**The author wishes to recognize Dr. Thomas J. Pallasch for his past contributions to this chapter. In: Dowd FJ, Johnson BS, Mariotti AJ, editors. Pharmacology and Therapeutics for Dentistry (Seventh Edition): Mosby; 2017. p. 457-487. | Title |
| 42 | Barber GR, Safdar A. 35 - Unique Antibacterial Agents. In: Bennett JE, Dolin R, Blaser MJ, editors. Mandell, Douglas, and Bennett's Principles and Practice of Infectious Diseases (Eighth Edition). Philadelphia: W.B. Saunders; 2015. p. 440-446.e2.                                                           | Title |
| 43 | Waller DG, Sampson AP. 51 - Chemotherapy of infections. In: Waller DG, Sampson AP, editors. Medical Pharmacology and Therapeutics (Fifth Edition): Elsevier; 2018. p. 581-629.                                                                                                                                   | Title |

|    |                                                                                                                                                                                                                                                                                             |       |
|----|---------------------------------------------------------------------------------------------------------------------------------------------------------------------------------------------------------------------------------------------------------------------------------------------|-------|
| 44 | Pai MP, Bertino JS. 54 - Tables of Anti-infective Agent Pharmacology. In: Bennett JE, Dolin R, Blaser MJ, editors. Mandell, Douglas, and Bennett's Principles and Practice of Infectious Diseases (Eighth Edition). Philadelphia: W.B. Saunders; 2015. p. 631-707.                          | Title |
| 45 | Harris JB, Brooks WA. 69 - Typhoid and Paratyphoid (Enteric) Fever. In: Magill AJ, Hill DR, Solomon T, et al., editors. Hunter's Tropical Medicine and Emerging Infectious Disease (Ninth Edition). London: W.B. Saunders; 2013. p. 568-576.                                                | Title |
| 46 | Harris JB, Brooks WA. 74 - Typhoid and Paratyphoid (Enteric) Fever. In: Ryan ET, Hill DR, Solomon T, et al., editors. Hunter's Tropical Medicine and Emerging Infectious Diseases (Tenth Edition). London: Elsevier; 2020. p. 608-616.                                                      | Title |
| 47 | Ardura MI, Koh AY. 97 - Fever and Granulocytopenia. In: Long SS, Prober CG, Fischer M, editors. Principles and Practice of Pediatric Infectious Diseases (Fifth Edition): Elsevier; 2018. p. 578-586.e4.                                                                                    | Title |
| 48 | Koh AY, Pizzo PA. 99 - Fever and Granulocytopenia. In: Long SS, editor. Principles and Practice of Pediatric Infectious Diseases (Fourth Edition). London: Elsevier; 2012. p. 567-573.e4.                                                                                                   | Title |
| 49 | Harris JB, Ryan ET. 102 - Enteric Fever and Other Causes of Fever and Abdominal Symptoms. In: Bennett JE, Dolin R, Blaser MJ, editors. Mandell, Douglas, and Bennett's Principles and Practice of Infectious Diseases (Eighth Edition). Philadelphia: W.B. Saunders; 2015. p. 1270-1282.e3. | Title |
| 50 | Marrazzo JM, Apicella MA. 214 - Neisseria gonorrhoeae (Gonorrhea). In: Bennett JE, Dolin R, Blaser MJ, editors. Mandell, Douglas, and Bennett's Principles and Practice of Infectious Diseases (Eighth Edition). Philadelphia: W.B. Saunders; 2015. p. 2446-2462.e3.                        | Title |
| 51 | Neely MN, Reed MD. 291 - Pharmacokinetic-Pharmacodynamic Basis of Optimal Antibiotic Therapy. In: Long SS, Prober CG, Fischer M, editors. Principles and Practice of Pediatric Infectious Diseases (Fifth Edition): Elsevier; 2018. p. 1478-1498.e6.                                        | Title |



|    |                                                                                                                                                                                                                                                                                                                 |        |
|----|-----------------------------------------------------------------------------------------------------------------------------------------------------------------------------------------------------------------------------------------------------------------------------------------------------------------|--------|
| 52 | Neely MN, Reed MD. 291 - Pharmacokinetic–Pharmacodynamic Basis of Optimal Antibiotic Therapy. In: Long SS, editor. Principles and Practice of Pediatric Infectious Diseases (Fourth Edition). London: Elsevier; 2012. p. 1433-1452.e10.                                                                         | Title  |
| 53 | Bradley JS, Sauberan JB. 292 - Antimicrobial Agents. In: Long SS, editor. Principles and Practice of Pediatric Infectious Diseases (Fourth Edition). London: Elsevier; 2012. p. 1453-1484.e5.                                                                                                                   | Title  |
| 54 | Sauberan JB, Bradley JS. 292 - Antimicrobial Agents. In: Long SS, Prober CG, Fischer M, editors. Principles and Practice of Pediatric Infectious Diseases (Fifth Edition): Elsevier; 2018. p. 1499-1531.e3.                                                                                                     | Title  |
| 55 | Drusano GL, Craig WA. 295 - Antibacterial Chemotherapy. In: Goldman L, Schafer AI, editors. Goldman's Cecil Medicine (Twenty Fourth Edition). Philadelphia: W.B. Saunders; 2012. p. 1803-1815.                                                                                                                  | Title  |
| 56 | Castagnola E, Mikulska M, Viscoli C. 310 - Prophylaxis and Empirical Therapy of Infection in Cancer Patients. In: Bennett JE, Dolin R, Blaser MJ, editors. Mandell, Douglas, and Bennett's Principles and Practice of Infectious Diseases (Eighth Edition). Philadelphia: W.B. Saunders; 2015. p. 3395-3413.e2. | Title  |
| 57 | Weiner CP, Buhimschi C. A. In: Weiner CP, Buhimschi C, editors. Drugs for Pregnant and Lactating Women (Second Edition). Philadelphia: W.B. Saunders; 2009. p. 1-79.                                                                                                                                            | Title  |
| 58 | Weiner CP, Mason C. A. In: Weiner CP, Mason C, editors. Drugs for Pregnant and Lactating Women (Third Edition). Philadelphia: Elsevier; 2019. p. 1-58.                                                                                                                                                          | Title  |
| 59 | Park G-B, Roh H-G, Lee K-P. Absorption Mechanism of Cefixime through the Nasal Cavity and Jejunum in Rats. YAKHAK HOEJI. 1994;38(2):114-122.                                                                                                                                                                    | Animal |
| 60 | TOKUMA Y, SEKIGUCHI M, FUJIWARA T, et al. Absorption, distribution, excretion and metabolism of cefixime in rats. Drug Metabolism and Pharmacokinetics. 1987;2(6):637-648.                                                                                                                                      | Animal |
| 61 | Abstracts. Journal of Allergy and Clinical Immunology. 1993 1993/01/01/;91(1, Part 2):141-379.                                                                                                                                                                                                                  | Title  |
| 62 | Abstracts. Clinical Microbiology and Infection. 2004 2004/01/01/;10:1-86.                                                                                                                                                                                                                                       | Title  |

|    |                                                                                                                                                                                                                                                                |          |
|----|----------------------------------------------------------------------------------------------------------------------------------------------------------------------------------------------------------------------------------------------------------------|----------|
| 63 | Abstracts. <i>Clinical Microbiology and Infection</i> . 2005 2005/01/01/;11:1-98.                                                                                                                                                                              | Title    |
| 64 | Abstracts. <i>Annals of Allergy, Asthma &amp; Immunology</i> . 2015 2015/11/01/;115(5, Supplement):A1-A142.                                                                                                                                                    | Title    |
| 65 | Abstracts accepted for publication only. <i>Clinical Microbiology and Infection</i> . 2007 2007/01/01/;13:S609-S676.                                                                                                                                           | Title    |
| 66 | Abstracts accepted for publication only. <i>Clinical Microbiology and Infection</i> . 2008 2008/05/01/;14:S667-S759.                                                                                                                                           | Title    |
| 67 | Abstracts accepted for publication only. <i>Clinical Microbiology and Infection</i> . 2011 2011/05/01/;17:S669-S834.                                                                                                                                           | Title    |
| 68 | Abstracts cont. <i>Clinical Microbiology and Infection</i> . 2004 2004/01/01/;10:486-543.                                                                                                                                                                      | Title    |
| 69 | Abstracts cont. <i>Clinical Microbiology and Infection</i> . 2005 2005/01/01/;11:238-390.                                                                                                                                                                      | Title    |
| 70 | Abstracts for Supplement. <i>International Journal of Infectious Diseases</i> . 2010 2010/03/01/;14:e191-e335.                                                                                                                                                 | Title    |
| 71 | Dagan R. Achieving bacterial eradication using pharmacokinetic/pharmacodynamic principles. <i>International journal of infectious diseases</i> . 2003;7:S21-S26.                                                                                               | Title    |
| 72 | Koeth L, Good C, Jacobs M, et al., editors. Activity of amoxicillin/clavulanic acid and 16 comparator agents against respiratory isolates, collected worldwide in 2000. Presented at the 101st General Meeting of the American Society for Microbiology; 2001. | Title    |
| 73 | Fera MT, Carbone M, Focà A. Activity of cefixime against <i>Helicobacter pylori</i> . <i>International Journal of Antimicrobial Agents</i> . 1993;3(2):105-108.                                                                                                | Abstract |
| 74 | Kohl PK, Tu Y, Hostalek U, et al. Activity of cefixime against <i>Neisseria gonorrhoeae</i> . <i>Journal of the European Academy of Dermatology and Venereology</i> . 1995;4(2):155-159.                                                                       | Abstract |

|    |                                                                                                                                                                                                                                                                                                                                                          |        |
|----|----------------------------------------------------------------------------------------------------------------------------------------------------------------------------------------------------------------------------------------------------------------------------------------------------------------------------------------------------------|--------|
| 75 | Jones RN, Critchley IA, Whittington WLH, et al. Activity of faropenem tested against <i>Neisseria gonorrhoeae</i> isolates including fluoroquinolone-resistant strains. <i>Diagnostic Microbiology and Infectious Disease</i> . 2005 2005/12/01/;53(4):311-317.                                                                                          | Title  |
| 76 | Rossi R, Castellani P, Younes G, et al. Activity of FCE 22891 compared with cefuroxime axetil and cefixime in pulmonary and subcutaneous infections in mice. <i>J Antimicrob Chemother</i> . 1989 Mar;23 Suppl C:149-55.                                                                                                                                 | Animal |
| 77 | Pottumarthy S, Fritsche TR, Jones RN. Activity of gemifloxacin tested against <i>Neisseria gonorrhoeae</i> isolates including antimicrobial-resistant phenotypes. <i>Diagnostic Microbiology and Infectious Disease</i> . 2006 2006/02/01/;54(2):127-134.                                                                                                | Title  |
| 78 | Cynamon MH, Sklaney M, Yeo AET. The activity of grepafloxacin in two murine models of <i>Mycobacterium avium</i> infection. <i>Journal of Infection and Chemotherapy</i> . 2004 2004/01/01/;10(3):185-188.                                                                                                                                               | Title  |
| 79 | Peric M, Browne FA, Jacobs MR, et al. Activity of nine oral agents against gram-positive and gram-negative bacteria encountered in community-acquired infections: use of pharmacokinetic/pharmacodynamic breakpoints in the comparative assessment of beta-lactam and macrolide antimicrobial agents. <i>Clinical therapeutics</i> . 2003;25(1):169-177. | Title  |
| 80 | Doern GV. Activity of oral $\beta$ -lactam antimicrobial agents versus respiratory tract isolates of <i>Streptococcus pneumoniae</i> , <i>Haemophilus influenzae</i> , and <i>Moraxella catarrhalis</i> in the era of antibiotic resistance. <i>Otolaryngology - Head and Neck Surgery</i> . 2002 2002/12/01/;127(6, Supplement):S17-S23.                | Title  |
| 81 | PICHICHERO ME. Activity of the newer oral extended-spectrum antimicrobials against resistant respiratory pathogens. <i>Pediatric Asthma, Allergy &amp; Immunology</i> . 1995;9(3):143-155.                                                                                                                                                               | Title  |
| 82 | Brook I. Acute Sinusitis in Children. <i>Pediatric Clinics of North America</i> . 2013 2013/04/01/;60(2):409-424.                                                                                                                                                                                                                                        | Title  |

|    |                                                                                                                                                                                                                                                                       |          |
|----|-----------------------------------------------------------------------------------------------------------------------------------------------------------------------------------------------------------------------------------------------------------------------|----------|
| 83 | Liu X, Chen Y, Yang H, et al. Acute toxicity is a dose-limiting factor for intravenous polymyxin B: A safety and pharmacokinetic study in healthy Chinese subjects. <i>Journal of Infection</i> . 2021 2021/02/01/;82(2):207-215.                                     | Title    |
| 84 | Amfilcon A. Acyl glucuronides.                                                                                                                                                                                                                                        | Title    |
| 85 | Qin Z. Advances in biopharmaceutical analysis in the People's Republic of China: 1991–1993. <i>Journal of Pharmaceutical and Biomedical Analysis</i> . 1995 1995/01/01/;13(1):1-7.                                                                                    | Title    |
| 86 | Wong SHY. Advances in liquid chromatography and related methodologies for therapeutic drug monitoring. <i>Journal of Pharmaceutical and Biomedical Analysis</i> . 1989 1989/01/01/;7(9):1011-1032.                                                                    | Title    |
| 87 | Siddiqui MA, More-O'Ferrall D, Hammod RS, et al. Agranulocytosis associated with yohimbine use. <i>Archives of Internal Medicine</i> . 1996;156(11):1235-1238.                                                                                                        | Title    |
| 88 | Alert. <i>International Journal of Antimicrobial Agents</i> . 1992 1992/01/01/;1(4):193-199.                                                                                                                                                                          | Title    |
| 89 | Jacobs MR, Felmingham D, Appelbaum PC, et al. The Alexander Project 1998-2000: susceptibility of pathogens isolated from community-acquired respiratory tract infection to commonly used antimicrobial agents. <i>J Antimicrob Chemother</i> . 2003 Aug;52(2):229-46. | Title    |
| 90 | Zafar S, Ali A, Ashraf M, et al. Alteration in disposition kinetics of warfarin mediated by caffeine in healthy male albino rabbits. <i>JAPS: Journal of Animal &amp; Plant Sciences</i> . 2019;29(2).                                                                | Animal   |
| 91 | Labro M, el Benna J, Jemni A. Alteration of bacteria induced by subinhibitory concentrations of cefixime: consequences on bactericidal activity of human polynuclear neutrophils. <i>Pathologie-biologie</i> . 1992;40(5):427-432.                                    | Abstract |
| 92 | Yasui H, Yamaoka K, Nakagawa T. Alternative continuous infusion method for analysis of enterohepatic circulation and biliary excretion of cefixime in the rat. <i>J Pharm Sci</i> . 1994 Jun;83(6):819-23.                                                            | Animal   |

|     |                                                                                                                                                                                                                                                                                                 |          |
|-----|-------------------------------------------------------------------------------------------------------------------------------------------------------------------------------------------------------------------------------------------------------------------------------------------------|----------|
| 93  | The American Academy of Allergy and Immunology. Journal of Allergy and Clinical Immunology. 1994<br>1994/01/01/;93(1, Part 2):A4-304.                                                                                                                                                           | Title    |
| 94  | Mahadevan U, Kane S. American Gastroenterological Association Institute Technical Review on the Use of<br>Gastrointestinal Medications in Pregnancy. Gastroenterology. 2006 2006/07/01/;131(1):283-311.                                                                                         | Title    |
| 95  | Okabe T, Yamazaki Y, Shiotani M, et al. An amino acid substitution in PBP-3 in Haemophilus influenzae<br>associate with the invasion to bronchial epithelial cells. Microbiological Research. 2010<br>2010/01/29/;165(1):11-20.                                                                 | Title    |
| 96  | García-Cobos S, Campos J, Lázaro E, et al. Ampicillin-resistant non- $\beta$ -lactamase-producing Haemophilus<br>influenzae in Spain: recent emergence of clonal isolates with increased resistance to cefotaxime and<br>cefixime. Antimicrobial agents and chemotherapy. 2007;51(7):2564-2573. | Abstract |
| 97  | Isla A, Canut A, Rodríguez-Gascón A, et al. Análisis farmacocinético/farmacodinámico (PK/PD) de la<br>antibioterapia en odontoestomatología. Enfermedades Infecciosas y Microbiología Clínica. 2005<br>2005/03/01/;23(3):116-121.                                                               | Title    |
| 98  | Natalia R. Analisis Minimalisasi Biaya Konversi Antibiotik Seftriakson menjadi Sefiksim Peroral pada<br>Pasien di Bangsal Penyakit dalam RSUD Prof. Dr. Margono Soekarjo: Universitas Jenderal Soedirman;<br>2018.                                                                              | Title    |
| 99  | El-Shaboury SR, Saleh GA, Mohamed FA, et al. Analysis of cephalosporin antibiotics. Journal of<br>Pharmaceutical and Biomedical Analysis. 2007 2007/09/21/;45(1):1-19.                                                                                                                          | Abstract |
| 100 | Churihar R, Tanwani H, Gupta K. Analysis of cephalosporins available in India: A pharmaco-economic<br>perspective. Asian Journal of Medical Sciences. 2022;13(5):119-124.                                                                                                                       | Abstract |

|     |                                                                                                                                                                                                                                                                                                         |          |
|-----|---------------------------------------------------------------------------------------------------------------------------------------------------------------------------------------------------------------------------------------------------------------------------------------------------------|----------|
| 101 | Naik PP, Mehta CD, Srivastava SK. Analysis of commonly used pediatric systemic antibacterial liquid formulations for rational drug therapy. National Journal of Physiology, Pharmacy and Pharmacology. 2017;7(4):348.                                                                                   | Title    |
| 102 | Kitagishi K, Shintani H. Analysis of compounds containing carboxyl groups in biological fluids by capillary electrophoresis. Journal of Chromatography B: Biomedical Sciences and Applications. 1998<br>1998/10/09;717(1):327-339.                                                                      | Title    |
| 103 | Yamaoka K, Kanba M, Toyoda Y, et al. Analysis of enterohepatic circulation of cefixime in rat by fast inverse Laplace transform (FILT). Journal of pharmacokinetics and biopharmaceutics. 1990;18(6):545-559.                                                                                           | Animal   |
| 104 | Vishwanath M, Arpitha D, Murgesh J. Analysis of pattern of antimicrobial usage in children of age 1 to 12 years with respiratory tract infections admitted in pediatric intensive care unit in a tertiary care hospital. National Journal of Physiology, Pharmacy and Pharmacology. 2022;12(6):856-856. | Title    |
| 105 | Protic D, Pejovic A, Djukanovic N, et al. Analysis of the third-and fourth-generation cephalosporin use for the treatment of infections caused by Gram-negative bacteria in hospital settings. International journal of clinical practice. 2016;70(12):1033-1040.                                       | Abstract |
| 106 | Nagaraju K, Chowdary Y. Analytical Method Development <i>and</i> Validation for The Simultaneous Estimation of Azithromycin and Cefixime by Rp-Hplc Method in Bulk and Pharmaceutical Formulations. 2018.                                                                                               | Abstract |
| 107 | Kathiravan S, Anbarasi B, Mathankumar S. Analytical method development and validation of cefixime and dicloxacillin tablet by RP-HPLC. Asian Journal of Research in Chemistry. 2010;3(4):865-868.                                                                                                       | Abstract |
| 108 | Ibrahim F, Wahba M, Magdy G. Analytical method development and validation of spectrofluorimetric and spectrophotometric determination of some antimicrobial drugs in their pharmaceuticals. Spectrochimica Acta Part A: Molecular and Biomolecular Spectroscopy. 2018;188:525-536.                      | Title    |

|     |                                                                                                                                                                                                                                                         |                |
|-----|---------------------------------------------------------------------------------------------------------------------------------------------------------------------------------------------------------------------------------------------------------|----------------|
| 109 | Okeke CC, Srinivasan VS. and Harry G. Britain'. Analytical Profiles of Drug Substances and Excipients. 1998:39.                                                                                                                                         | Title          |
| 110 | Musther H, Olivares-Morales A, Hatley OJD, et al. Animal versus human oral drug bioavailability: Do they correlate? European Journal of Pharmaceutical Sciences. 2014 2014/06/16/;57:280-291.                                                           | Title          |
| 111 | Jacobs MR. Anti-infective pharmacodynamics – maximizing efficacy, minimizing toxicity. Drug Discovery Today: Therapeutic Strategies. 2004 2004/12/01/;1(4):505-512.                                                                                     | Title          |
| 112 | Bauernfeind A, Jungwirth R, Schweighart S, et al. [Antibacterial activity and beta-lactamase stability of eleven oral cephalosporins]. Infection. 1990;18 Suppl 3:S155-67.                                                                              | Not accessible |
| 113 | Wiedemann B, Jansen A. Antibacterial activity of cefpodoxime proxetil in a pharmacokinetic in-vitro model. Journal of Antimicrobial Chemotherapy. 1990;26(1):71-79.                                                                                     | Title          |
| 114 | Nakamura T, Takahashi H. Antibacterial activity of oral cepheems against various clinically isolated strains and evaluation of efficacy based on the pharmacokinetics/pharmacodynamics theory. The Japanese journal of antibiotics. 2004;57(6):465-474. | Title          |
| 115 | Kern TJ. Antibacterial agents for ocular therapeutics. Veterinary Clinics of North America: Small Animal Practice. 2004 2004/05/01/;34(3):655-668.                                                                                                      | Animal         |
| 116 | Bowlware KL, Stull T. Antibacterial agents in pediatrics. Infectious Disease Clinics of North America. 2004 2004/09/01/;18(3):513-531.                                                                                                                  | Title          |
| 117 | Chavez-Bueno S, Stull TL. Antibacterial Agents in Pediatrics. Infectious Disease Clinics of North America. 2009 2009/12/01/;23(4):865-880.                                                                                                              | Title          |
| 118 | LiPuma JJ, Stull TL. Antibacterial agents in pediatrics. Infectious Disease Clinics of North America. 1995;9(3):561-574.                                                                                                                                | Title          |

|     |                                                                                                                                                                                                                                                             |                |
|-----|-------------------------------------------------------------------------------------------------------------------------------------------------------------------------------------------------------------------------------------------------------------|----------------|
| 119 | San Joaquin VH, Stull TL. Antibacterial agents in Pediatrics. Infectious Disease Clinics of North America. 2000;14(2):341-355.                                                                                                                              | Title          |
| 120 | Papich MG. Antibacterial drug therapy: focus on new drugs. Veterinary Clinics: Small Animal Practice. 1998;28(2):215-231.                                                                                                                                   | Animal         |
| 121 | Soussy CJ, Meyran M, Duval J. [Antibacterial effect of cefixime]. Presse Med. 1989 Oct 11;18(32):1546-50.                                                                                                                                                   | Not accessible |
| 122 | Arayne MS, Sultana N, Khanum F, et al. Antibacterial studies of cefixime copper, zinc and cadmium complexes. Pak J Pharm Sci. 2002;15:1-8.                                                                                                                  | Abstract       |
| 123 | Kazantsev V, Guchev I. Antibacterial treatment of moderate chronic obstructive pulmonary disease exacerbation. PULMONOLOGIYA. 2014 (4):105-111.                                                                                                             | Title          |
| 124 | Jain A, Parihar DK. Antibacterial, biofilm dispersal and antibiofilm potential of alkaloids and flavonoids of Curcuma. Biocatalysis and Agricultural Biotechnology. 2018 2018/10/01/;16:677-682.                                                            | Title          |
| 125 | Troeltzsch M, Pache C, Probst FA, et al. Antibiotic Concentrations in Saliva: A Systematic Review of the Literature, With Clinical Implications for the Treatment of Sialadenitis. Journal of Oral and Maxillofacial Surgery. 2014 2014/01/01/;72(1):67-75. | Title          |
| 126 | Van Bambeke F, Michot J-M, Tulkens PM. Antibiotic efflux pumps in eukaryotic cells: occurrence and impact on antibiotic cellular pharmacokinetics, pharmacodynamics and toxicodynamics. Journal of Antimicrobial Chemotherapy. 2003;51(5):1067-1077.        | Title          |
| 127 | Crowe HM, Quintiliani R. Antibiotic formulary selection. Medical Clinics of North America. 1995 1995/01/01/;79(3):463-476.                                                                                                                                  | Title          |
| 128 | Lutsar I, McCracken Jr GH, Friedland IR. Antibiotic pharmacodynamics in cerebrospinal fluid. Clinical Infectious Diseases. 1998:1117-1127.                                                                                                                  | Title          |



|     |                                                                                                                                                                                                                                              |       |
|-----|----------------------------------------------------------------------------------------------------------------------------------------------------------------------------------------------------------------------------------------------|-------|
| 129 | Majhi B, Panda A, Barma SK. Antibiotic prescribing pattern in paediatrics outpatient in a tertiary care hospital. <i>J Evid Based Med.</i> 2017;4:3048-3051.                                                                                 | Title |
| 130 | Esposito S, Biasucci G, Pasini A, et al. Antibiotic Resistance in Paediatric Febrile Urinary Tract Infections. <i>Journal of Global Antimicrobial Resistance.</i> 2022 2022/06/01/;29:499-506.                                               | Title |
| 131 | Chartrand SA. Antibiotic resistance in pediatric respiratory tract pathogens. <i>Seminars in Pediatric Infectious Diseases.</i> 1998 1998/10/01/;9(4):292-300.                                                                               | Title |
| 132 | Nuermberger EL, Bishai WR. Antibiotic resistance in <i>Streptococcus pneumoniae</i> : what does the future hold? <i>Clinical infectious diseases.</i> 2004;38(Supplement_4):S363-S371.                                                       | Title |
| 133 | Sah SK, Regmi S, Upreti AR, et al. Antibiotic resistance patterns and evaluation of treatment in out-patients with urinary tract infections in Nepal. <i>International journal of pharmaceutical sciences and research.</i> 2016;7(11):4626. | Title |
| 134 | Roe VA. Antibiotic Resistance: A Guide for Effective Prescribing in Women's Health. <i>Journal of Midwifery &amp; Women's Health.</i> 2008 2008/05/01/;53(3):216-226.                                                                        | Title |
| 135 | Brown PD. Antibiotic selection for urinary tract infection: new microbiologic considerations. <i>Current infectious disease reports.</i> 1999;1(4):384-388.                                                                                  | Title |
| 136 | Ellison MJ, Crabtree DW. Antibiotic Therapy for Common Infections. <i>Primary Care: Clinics in Office Practice.</i> 1990 1990/09/01/;17(3):521-541.                                                                                          | Title |
| 137 | Iravani A, Bischoff W. Antibiotic therapy for urinary tract infections. <i>The American Journal of Medicine.</i> 1992 1992/06/22/;92(6, Supplement 1):S95-S100.                                                                              | Title |
| 138 | Antibiotic treatment of children with secretory otitis media. A randomized, double-blind, placebo-controlled study: Thomsen, J., Sederberg-Olsen, J., Balle, V., Vejlsgaard, R., Stangerup S.-E. and Bondesson, G., <i>Arch.</i>             | Title |

|     |                                                                                                                                                                                                                          |          |
|-----|--------------------------------------------------------------------------------------------------------------------------------------------------------------------------------------------------------------------------|----------|
|     | Otolaryngol. Head Neck Surg. (1989) 115/4 (447–451). International Journal of Pediatric Otorhinolaryngology. 1989 1989/09/01/;18(1):87-95.                                                                               |          |
| 139 | Cunha BA. The antibiotic treatment of community-acquired, atypical, and nosocomial pneumonias. Medical Clinics of North America. 1995 1995/01/01/;79(3):581-597.                                                         | Title    |
| 140 | Panday DR, Amar A, Subedi A, et al. Antibiotic Usage and its Culture Sensitivity Pattern in Urinary Tract Infections at Tertiary Hospital in Eastern Nepal. Kathmandu Univ Med J (KUMJ). 2017 Oct.- Dec.;15(60):332-335. | Title    |
| 141 | Ambrose PG, Owens RC, Quintiliani R, et al. ANTIBIOTIC USE IN THE CRITICAL CARE UNIT. Critical Care Clinics. 1998 1998/04/01/;14(2):283-308.                                                                             | Title    |
| 142 | Pollack ES, Pollack CV. Antibiotic use in the emergency department: I. The penicillins and cephalosporins. The Journal of Emergency Medicine. 1996 1996/03/01/;14(2):213-222.                                            | Abstract |
| 143 | Aloy B, Launay-Vacher V, Bleibtreu A, et al. Antibiotics and chronic kidney disease: Dose adjustment update for infectious disease clinical practice. Medecine et Maladies Infectieuses. 2020;50(4):323-331.             | Title    |
| 144 | Gura KM. Antibiotics and Drugs: Drug–Nutrient Interactions. In: Caballero B, Finglas PM, Toldrá F, editors. Encyclopedia of Food and Health. Oxford: Academic Press; 2016. p. 174-191.                                   | Title    |
| 145 | Comunián-Carrasco G, Peña-Martí GE, Martí-Carvajal AJ. Antibiotics for treating gonorrhoea in pregnancy. Cochrane Database of Systematic Reviews. 2018 (2).                                                              | Title    |
| 146 | Darmstadt GL. ANTIBIOTICS IN THE MANAGEMENT OF PEDIATRIC SKIN DISEASE. Dermatologic Clinics. 1998 1998/07/01/;16(3):509-525.                                                                                             | Title    |
| 147 | Mirzaei R, Mesdaghinia A, Hoseini SS, et al. Antibiotics in urban wastewater and rivers of Tehran, Iran: consumption, mass load, occurrence, and ecological risk. Chemosphere. 2019;221:55-66.                           | Title    |

|     |                                                                                                                                                                                                                                                                                     |       |
|-----|-------------------------------------------------------------------------------------------------------------------------------------------------------------------------------------------------------------------------------------------------------------------------------------|-------|
| 148 | Uddin MB, Rabby SF. Antibiotics Prescribing in Labor and Delivery Patients in a Tertiary Care Hospital: Bangladesh Perspective. International Journal of Pharma Sciences and Research. 2015;6:1412-1417.                                                                            | Title |
| 149 | Guerrero Sánchez F, Brun Romero F, Girón González JA. Antiinfecciosos de empleo en infecciones del sistema nervioso central. Medicine - Programa de Formación Médica Continuada Acreditado. 2003 2003/01/01/;8(97):5254-5259.                                                       | Title |
| 150 | Ishii Y, Suzuki Y, Ishihara R, et al. [Antimicrobial activities of cefetamet against clinical isolates from urinary tract infection]. Jpn J Antibiot. 1996 Dec;49(12):1073-84.                                                                                                      | Title |
| 151 | Jones RN, Barry AL. Antimicrobial activity and disk diffusion susceptibility testing of U-76,253 A (R-3746), the active metabolite of the new cephalosporin ester, U-76,252 (CS-807). Antimicrobial Agents and Chemotherapy. 1988;32(4):443-449.                                    | Title |
| 152 | Johnson DM, Biedenbach DJ, Beach ML, et al. Antimicrobial activity and in vitro susceptibility test development for cefditoren against Haemophilus influenzae, Moraxella catarrhalis, and Streptococcus species. Diagnostic microbiology and infectious disease. 2000;37(2):99-105. | Title |
| 153 | Jones RN. Antimicrobial activity and spectrum of ceftibuten (7432-S, SCH 39720) a review of United States and canadian results. Diagnostic microbiology and infectious disease. 1991;14(1):37-43.                                                                                   | Title |
| 154 | Deguchi K, Yokota N, Koguchi M, et al. Antimicrobial activity of cefetamet against fresh clinical isolates of Branhamella catarrhalis. The Japanese Journal of Antibiotics. 1992;45(4):359-363.                                                                                     | Title |
| 155 | Marchese A, Debbia EA, Bryskier A, et al. Antimicrobial activity of faropenem, a new oral penem, against lower respiratory tract pathogens. Clinical Microbiology and Infection. 1999 1999/05/01/;5(5):282-287.                                                                     | Title |
| 156 | Jones RN, Sader HS, Fritsche TR. Antimicrobial activity of LBM415 (NVP PDF-713) tested against pathogenic Neisseria spp. (Neisseria gonorrhoeae and Neisseria meningitidis). Diagnostic Microbiology and Infectious Disease. 2005 2005/02/01/;51(2):139-141.                        | Title |

|     |                                                                                                                                                                                                                                                               |       |
|-----|---------------------------------------------------------------------------------------------------------------------------------------------------------------------------------------------------------------------------------------------------------------|-------|
| 157 | Neuman M. The antimicrobial activity of nonantibiotics and their interactions with antibiotics: Synergy and antagonism. Antimicrobial Newsletter. 1990 1990/06/01/;7(6):41-46.                                                                                | Title |
| 158 | Jones RN, Fuchs PC, Barry AL, et al. Antimicrobial activity of Ro 19-5247 (T-2525), a new oral cephalosporin, tested against 7,745 recent clinical isolates. Diagnostic microbiology and infectious disease. 1987;6(3):193-198.                               | Title |
| 159 | Jones RN. Antimicrobial activity, spectrum and pharmacokinetics of old and new orally administered cepheems. Antimicrobial Newsletter. 1988;5(1):1-7.                                                                                                         | Title |
| 160 | Jones RN, Barry AL. Antimicrobial activity, spectrum, and recommendations for disk diffusion susceptibility testing of ceftibuten (7432-S; SCH 39720), a new orally administered cephalosporin. Antimicrobial agents and chemotherapy. 1988;32(10):1576-1582. | Title |
| 161 | Embil JM, Nicolle LE. Antimicrobial Agents. Physical Medicine and Rehabilitation Clinics of North America. 1999 1999/05/01/;10(2):403-436.                                                                                                                    | Title |
| 162 | Epstein ME, Amodio-Groton M, Sadick NS. Antimicrobial agents for the dermatologist. I. $\beta$ -Lactam antibiotics and related compounds. Journal of the American Academy of Dermatology. 1997 1997/08/01/;37(2, Part 1):149-165.                             | Title |
| 163 | Neu HC. Antimicrobial agents: The old and the new. American Journal of Infection Control. 1989;17(5):276-285.                                                                                                                                                 | Title |
| 164 | Pai MP, Bearden DT. Antimicrobial dosing considerations in obese adult patients: insights from the Society of Infectious Diseases Pharmacists. Pharmacotherapy: The Journal of Human Pharmacology and Drug Therapy. 2007;27(8):1081-1091.                     | Title |
| 165 | Jean S-S, Hsueh P-R. Antimicrobial Drug Resistance in Taiwan. Journal of the Formosan Medical Association. 2011 2011/01/01/;110(1):4-13.                                                                                                                      | Title |

|     |                                                                                                                                                                                                                                                                                                                                                 |          |
|-----|-------------------------------------------------------------------------------------------------------------------------------------------------------------------------------------------------------------------------------------------------------------------------------------------------------------------------------------------------|----------|
| 166 | Jang H-S, Park M-G, Kook J-K, et al. Antimicrobial effect of cefixime on 6 species of periodopathogens. The Journal of the Korean Academy of Periodontology. 2005;35(2):401-411.                                                                                                                                                                | Abstract |
| 167 | Jacobs MR, Dagan R. Antimicrobial resistance among pediatric respiratory tract infections: clinical challenges. Seminars in Pediatric Infectious Diseases. 2004 2004/01/01/;15(1):5-20.                                                                                                                                                         | Title    |
| 168 | Shi J, Yan Y, Links MG, et al. Antimicrobial resistance genetic factor identification from whole-genome sequence data using deep feature selection. BMC Bioinformatics. 2019 Dec 24;20(Suppl 15):535.                                                                                                                                           | Title    |
| 169 | Craig WA. Antimicrobial resistance issues of the future. Diagnostic microbiology and infectious disease. 1996;25(4):213-217.                                                                                                                                                                                                                    | Title    |
| 170 | Pulingam T, Parumasivam T, Gazzali AM, et al. Antimicrobial resistance: Prevalence, economic burden, mechanisms of resistance and strategies to overcome. European Journal of Pharmaceutical Sciences. 2022 2022/03/01/;170:106103.                                                                                                             | Title    |
| 171 | Owens RC, Ambrose PG. Antimicrobial stewardship and the role of pharmacokinetics–pharmacodynamics in the modern antibiotic era. Diagnostic Microbiology and Infectious Disease. 2007 2007/03/01/;57(3, Supplement):S77-S83.                                                                                                                     | Title    |
| 172 | Lagacé-Wiens P, Adam H, Laing N, et al. Antimicrobial susceptibility of clinical isolates of Neisseria gonorrhoeae to alternative antimicrobials with therapeutic potential. Journal of Antimicrobial Chemotherapy. 2017;72(8):2273-2277.                                                                                                       | Title    |
| 173 | Quilter LA, Cyr SBS, Hong J, et al. Antimicrobial susceptibility of urogenital and extragenital Neisseria gonorrhoeae isolates among men who have sex with men: Strengthening the US Response to Resistant Gonorrhea and Enhanced Gonococcal Isolate Surveillance Project, 2018 to 2019. Sexually Transmitted Diseases. 2021;48(12S):S111-S117. | Title    |

|     |                                                                                                                                                                                                                                |       |
|-----|--------------------------------------------------------------------------------------------------------------------------------------------------------------------------------------------------------------------------------|-------|
| 174 | Humphries RM, Schuetz AN. Antimicrobial Susceptibility Testing of Bacteria That Cause Gastroenteritis. Clinics in Laboratory Medicine. 2015 2015/06/01/;35(2):313-331.                                                         | Title |
| 175 | Jorgensen JH. Antimicrobial susceptibility testing of Haemophilus influenzae: An update. Antimicrobial Newsletter. 1989 1989/08/01/;6(8):65-68.                                                                                | Title |
| 176 | McCue JD. Antimicrobial Therapy. Clinics in Geriatric Medicine. 1992 1992/11/01/;8(4):925-946.                                                                                                                                 | Title |
| 177 | Spach DH. Antimicrobial Therapy.                                                                                                                                                                                               | Title |
| 178 | Henry NK, Hoecker JL, Rhodes KH. Antimicrobial Therapy for Infants and Children: Guidelines for the Inpatient and Outpatient Practice of Pediatric Infectious Diseases. Mayo Clinic Proceedings. 2000 2000/01/01/;75(1):86-97. | Title |
| 179 | Houang ET. Antimicrobial therapy in gynaecology. Current Obstetrics & Gynaecology. 1994 1994/06/01/;4(2):107-112.                                                                                                              | Title |
| 180 | Liu P, Derendorf H. Antimicrobial tissue concentrations. Infectious Disease Clinics of North America. 2003 2003/09/01/;17(3):599-613.                                                                                          | Title |
| 181 | Antimicrobial treatment guidelines for acute bacterial rhinosinusitis. Disease-a-Month. 2001 2001/11/01/;47(11):537-585.                                                                                                       | Title |
| 182 | Anon JB, Jacobs MR, Poole MD, et al. Antimicrobial treatment guidelines for acute bacterial rhinosinusitis. Otolaryngol Head Neck Surg. 2004 Jan;130(1 Suppl):1-45.                                                            | Title |
| 183 | Antimicrobial treatment guidelines for acute bacterial rhinosinusitis: Sinus and Allergy Health Partnership *. Otolaryngology - Head and Neck Surgery. 2000 2000/07/01/;123(1, Part 2):S4-S31.                                 | Title |
| 184 | Giebink GS, Canafax DM, Kempthorne J. Antimicrobial treatment of acute otitis media. The Journal of pediatrics. 1991;119(3):495-500.                                                                                           | Title |

|     |                                                                                                                                                                                                                                                                         |          |
|-----|-------------------------------------------------------------------------------------------------------------------------------------------------------------------------------------------------------------------------------------------------------------------------|----------|
| 185 | Giebink GS, Canafax DM. Antimicrobial treatment of otitis media. <i>Semin Respir Infect.</i> 1991 Jun;6(2):85-93.                                                                                                                                                       | Title    |
| 186 | Cohen R, Raymond J, Launay E, et al. Antimicrobial treatment of urinary tract infections in children. <i>Archives de Pédiatrie.</i> 2017;24(12):S22-S25.                                                                                                                | Title    |
| 187 | Sinyakova L, Kosova I. Antimikrobnaya terapiya neoslozhnennykh infektsiy mochevykh putey. <i>Consilium Medicum.</i> 2014;16(7):29-33.                                                                                                                                   | Title    |
| 188 | Ward K, Azzarano L, Evans C, et al. Apparent absolute oral bioavailability in excess of 100% for a vitronectin receptor antagonist (SB-265123) in rat. I. Investigation of potential experimental and mechanistic explanations. <i>Xenobiotica.</i> 2004;34(4):353-366. | Animal   |
| 189 | Prankerd RJ. Appendix B. Profiles of Drug Substances, Excipients and Related Methodology. Vol. 33: Academic Press; 2007. p. 425-626.                                                                                                                                    | Title    |
| 190 | Appendix D - Drugs in breast milk and the effect on the infant. In: Lawrence RA, Lawrence RM, editors. <i>Breastfeeding (Sixth Edition).</i> Philadelphia: Mosby; 2005. p. 832-994.                                                                                     | Title    |
| 191 | Deshpande MM, Kasture VS, Gosavi SA. Application of HPLC and HPTLC for the simultaneous determination of cefixime trihydrate and ambroxol hydrochloride in pharmaceutical dosage form. <i>Eurasian J Anal Chem.</i> 2010;5(3):227-238.                                  | Abstract |
| 192 | Lu W-Y, Li H-J, Li Q-Y, et al. Application of marine natural products in drug research. <i>Bioorganic &amp; Medicinal Chemistry.</i> 2021 2021/04/01;35:116058.                                                                                                         | Title    |
| 193 | Andes D, Anon J, Jacobs MR, et al. Application of pharmacokinetics and pharmacodynamics to antimicrobial therapy of respiratory tract infections. <i>Clinics in Laboratory Medicine.</i> 2004 2004/06/01;24(2):477-502.                                                 | Title    |

|     |                                                                                                                                                                                                                                                                                                                                                 |                |
|-----|-------------------------------------------------------------------------------------------------------------------------------------------------------------------------------------------------------------------------------------------------------------------------------------------------------------------------------------------------|----------------|
| 194 | Ravichandiran V, Sumithra M. Application of quality by design (CCD Technique) for simultaneous estimation of cefixime and ofloxacin by HPTLC method. <i>Int J Pharm Pharm Sci.</i> 2016;8(7):200-28.                                                                                                                                            | Abstract       |
| 195 | Gan L-SL, Thakker DR. Applications of the Caco-2 model in the design and development of orally active drugs: elucidation of biochemical and physical barriers posed by the intestinal epithelium. <i>Advanced Drug Delivery Reviews.</i> 1997 1997/01/15/;23(1):77-98.                                                                          | Title          |
| 196 | Rodríguez-Gascón A, Aguirre-Quiñonero A, Canut-Blasco A. Are oral cefuroxime axetil, cefixime and cefditoren pivoxil adequate to treat uncomplicated acute pyelonephritis after switching from intravenous therapy? A pharmacokinetic/pharmacodynamic perspective. <i>Enfermedades Infecciosas y Microbiología Clínica.</i> 2020;38(7):306-311. | Abstract       |
| 197 | Mori N, Kodama T, Sakai A, et al. AS-924, a novel, orally active, bifunctional prodrug of ceftizoxime: physicochemical properties, oral absorption in animals, and antibacterial activity. <i>International Journal of Antimicrobial Agents.</i> 2001 2001/11/01/;18(5):451-461.                                                                | Animal         |
| 198 | Bolognesi M, Spallarossa A. [Assessing the chemical cross-reaction from cefixime and some nonsteroidal anti-inflammatory agents in a soluble formulation]. <i>Boll Chim Farm.</i> 2001 Nov-Dec;140(6):445-7.                                                                                                                                    | Not Accessible |
| 199 | Low DE. Assessment of the use of cefixime for switch therapy. <i>Infection.</i> 1995;23 Suppl 2:S91-4.                                                                                                                                                                                                                                          | Abstract       |
| 200 | Phongphaew W, Kongtia M, Kim K, et al. Association of bacterial isolates and antimicrobial susceptibility between prostatic fluid and urine samples in canine prostatitis with concurrent cystitis. <i>Theriogenology.</i> 2021 2021/10/01/;173:202-210.                                                                                        | Title          |
| 201 | Author index. <i>Journal of Chromatography B: Biomedical Sciences and Applications.</i> 1987 1987/01/01/;422:361-364.                                                                                                                                                                                                                           | Title          |
| 202 | Author index. <i>International Journal of Antimicrobial Agents.</i> 1994 1994/01/01/;3(4):281-283.                                                                                                                                                                                                                                              | Title          |
| 203 | Author Index. <i>Journal of Chromatography B.</i> 2005 2005/05/25/;819(2):347-350.                                                                                                                                                                                                                                                              | Title          |



|     |                                                                                                                                                                                                                                                                                                  |          |
|-----|--------------------------------------------------------------------------------------------------------------------------------------------------------------------------------------------------------------------------------------------------------------------------------------------------|----------|
| 204 | Author index and Subject index Volumes 1–149. <i>International Journal of Pharmaceutics</i> . 1997<br>1997/01/01/;150:1-271.                                                                                                                                                                     | Title    |
| 205 | Author index volumes 351–400. <i>Journal of Chromatography A</i> . 1987 1987/01/01/;401:1-136.                                                                                                                                                                                                   | Title    |
| 206 | Author index volumes 401–450. <i>Journal of Chromatography A</i> . 1988 1988/01/01/;451:1-154.                                                                                                                                                                                                   | Title    |
| 207 | Author index volumes 551–600. <i>Journal of Chromatography A</i> . 1993 1993/04/02/;601(1):1-128.                                                                                                                                                                                                | Title    |
| 208 | Authors. In: Enna SJ, Bylund DB, editors. <i>xPharm: The Comprehensive Pharmacology Reference</i> . New York: Elsevier; 2011. p. 1-107.                                                                                                                                                          | Title    |
| 209 | Auto-Immunity, Allergy and Inflammation. <i>Journal of Investigative Dermatology</i> . 2014 2014/01/01/;134:S1-S17.                                                                                                                                                                              | Title    |
| 210 | Giri A, Karkey A, Dongol S, et al. Azithromycin and cefixime combination versus azithromycin alone for the out-patient treatment of clinically suspected or confirmed uncomplicated typhoid fever in South Asia: a randomised controlled trial protocol. <i>Wellcome Open Research</i> . 2021;6. | Abstract |
| 211 | Pacifico L, Chiesa C. Azithromycin in children: A critical review of the evidence. <i>Current Therapeutic Research</i> . 2002 2002/01/01/;63(1):54-76.                                                                                                                                           | Title    |
| 212 | Hoepelman IM, Schneider MME. Azithromycin: the first of the tissue-selective azalides. <i>International Journal of Antimicrobial Agents</i> . 1995 1995/05/01/;5(3):145-167.                                                                                                                     | Title    |
| 213 | Bryskier A. <i>Bacillus anthracis</i> and antibacterial agents. <i>Clinical Microbiology and Infection</i> . 2002<br>2002/08/01/;8(8):467-478.                                                                                                                                                   | Title    |
| 214 | Harris J-AS. Bacterial pneumonia in the 1990s. <i>Seminars in Pediatric Infectious Diseases</i> . 1995<br>1995/07/01/;6(3):142-148.                                                                                                                                                              | Title    |

|     |                                                                                                                                                                                                                                                                                                                     |                |
|-----|---------------------------------------------------------------------------------------------------------------------------------------------------------------------------------------------------------------------------------------------------------------------------------------------------------------------|----------------|
| 215 | Cappelletty DM, Rybak MJ. Bactericidal activities of cefprozil, penicillin, cefaclor, cefixime, and loracarbef against penicillin-susceptible and-resistant <i>Streptococcus pneumoniae</i> in an in vitro pharmacodynamic infection model. <i>Antimicrobial Agents and Chemotherapy</i> . 1996;40(5):1148-1152.    | Abstract       |
| 216 | Rolin O, Roche G, Bouanchaud D. Bactericidal activity of cefotaxime and cefixime in a kinetic model in vitro. <i>Presse Medicale[PRESSE MED]</i> . 1989;18(32).                                                                                                                                                     | Abstract       |
| 217 | Takahata M, Sugiura Y, Shinmura Y, et al. Bactericidal activity of garenoxacin against in vitro biofilm formed by nontypeable <i>Haemophilus influenzae</i> . <i>Journal of Infection and Chemotherapy</i> . 2013 2013/01/01;19(3):441-446.                                                                         | Title          |
| 218 | Bedenic B, Vranes J, Suto S, et al. Bactericidal activity of oral $\beta$ -lactam antibiotics in plasma and urine versus isogenic <i>Escherichia coli</i> strains producing broad- and extended-spectrum $\beta$ -lactamases. <i>International Journal of Antimicrobial Agents</i> . 2005 2005/06/01;25(6):479-487. | Title          |
| 219 | Gómez-Lus R. [Bacteriological aspects of acute otitis media [corrected]. <i>An Esp Pediatr</i> . 1991 Dec;35 Suppl 46:99-100.                                                                                                                                                                                       | Not Accessible |
| 220 | Toyonaga Y, Hatakeyama K, Yamori K, et al. Bacteriological, pharmacokinetic and clinical studies of 5% and 10% granules of cefdinir in the pediatric field. <i>The Japanese Journal of Antibiotics</i> . 1992;45(1):48-73.                                                                                          | Title          |
| 221 | Toyonaga Y, Ishihara T, Sano T, et al. Bacteriological, pharmacokinetic and clinical studies of cefditoren pivoxil in the pediatric field. <i>The Japanese Journal of Antibiotics</i> . 1993;46(7):604-628.                                                                                                         | Title          |
| 222 | Shahbazi E, Morshedzadeh F, Zaeifi D. Bacteriostatic potency of Fe <sub>2</sub> O <sub>3</sub> against <i>Enterococcus faecalis</i> in synergy with antibiotics by DDST method. <i>Avicenna Journal of Medical Biotechnology</i> . 2019;11(2):176.                                                                  | Title          |
| 223 | Bignell C. BASHH guideline for gonorrhoea. <i>The Medical Society for the Study of Venereal Disease</i> ; 2004. p. 330-331.                                                                                                                                                                                         | Title          |

|     |                                                                                                                                                                                                                                                                                             |       |
|-----|---------------------------------------------------------------------------------------------------------------------------------------------------------------------------------------------------------------------------------------------------------------------------------------------|-------|
| 224 | Motohiro T, Handa S, Yamada S, et al. Basic and clinical studies on cefditoren pivoxil in pediatric field. The Japanese Journal of Antibiotics. 1994;47(4):409-427.                                                                                                                         | Title |
| 225 | Craig WA. Basic pharmacodynamics of antibacterials with clinical applications to the use of $\beta$ -lactams, glycopeptides, and linezolid. Infectious Disease Clinics of North America. 2003 2003/09/01/;17(3):479-501.                                                                    | Title |
| 226 | Zaman M, Hanif M, Hassan SSU, et al. Beta-Cyclodextrin and Maltodextrin Based Solid Dispersion of Meloxicam to Enhance the Solubility of Meloxicam; Formulation and In-vitro Evaluation. Journal of the Chemical Society of Pakistan. 2019;41(1):133-133.                                   | Title |
| 227 | Danziger LH, Horn KS. Beta-lactam antibiotics. Drug Interactions in Infectious Diseases: Antimicrobial Drug Interactions: Springer; 2018. p. 1-56.                                                                                                                                          | Title |
| 228 | Martin SI, Kaye KM. Beta-lactam antibiotics: Newer formulations and newer agents. Infectious Disease Clinics of North America. 2004 2004/09/01/;18(3):603-619.                                                                                                                              | Title |
| 229 | Novelli A, Mazzei T, Fallani S, et al. Betalactam therapy and intestinal flora [Clinical Trial; Comparative Study; Journal Article; Randomized Controlled Trial]. Journal of chemotherapy (Florence, Italy). 1995;7 Suppl 1:25-31.                                                          | Title |
| 230 | Hinderling PH. Biased estimates of nonrenal clearance. Journal of pharmaceutical sciences. 2001;90(7):960-966.                                                                                                                                                                              | Title |
| 231 | Wang X, Liu Y, Liu J, et al. A bifunctional electrochemical sensor for simultaneous determination of electroactive and non-electroactive analytes: A universal yet very effective platform serving therapeutic drug monitoring. Biosensors and Bioelectronics. 2022 2022/07/15/;208:114233. | Title |
| 232 | Shariatnia Z. Big family of nano- and microscale drug delivery systems ranging from inorganic materials to polymeric and stimuli-responsive carriers as well as drug-conjugates. Journal of Drug Delivery Science and Technology. 2021 2021/12/01/;66:102790.                               | Title |

|     |                                                                                                                                                                                                                                           |                   |
|-----|-------------------------------------------------------------------------------------------------------------------------------------------------------------------------------------------------------------------------------------------|-------------------|
| 233 | Akhtar M, Jamshaid M, Zaman M, et al. Bilayer tablets: A developing novel drug delivery system. Journal of Drug Delivery Science and Technology. 2020 2020/12/01/;60:102079.                                                              | Title             |
| 234 | Westphal JF, Brogard JM, Jehl F, et al. [Biliary excretion and hepatic disposal of cefixime: experimental and clinical study]. Pathol Biol (Paris). 1992 May;40(5):538-44.                                                                | Not Accessible    |
| 235 | Bhinge SD, Malipatil SM, Sonawane LV. Bioanalytical method development and validation for simultaneous estimation of cefixime and dicloxacillin by RP-HPLC in human plasma. Acta Chimica Slovenica. 2014;61(3):580-586.                   | Abstract          |
| 236 | Pomeranz A, El-Khayam A, Korzets Z, et al. A bioassay evaluation of the urinary antibacterial efficacy of low dose prophylactic antibiotics in children with vesicoureteral reflux. The Journal of urology. 2000;164(3 Part 2):1070-1073. | Title             |
| 237 | Pomeranz A, El-Khayam A, Korzets Z, et al. A bioassay evaluation of the urinary antibacterial efficacy of low dose prophylactic antibiotics in children with vesicoureteral reflux. J Urol. 2000 Sep;164(3 Pt 2):1070-3.                  | Title             |
| 238 | Chaudhari R, Singh K, Kodgire P. Biochemical and Molecular Mechanisms of Antibiotic Resistance in Salmonella spp. Research in Microbiology. 2022 2022/08/06/:103985.                                                                      | Title             |
| 239 | Ammoo AM, Al-Tamimi DJ, Al-Mahroos MI, et al. Bioequivalence and Pharmacokinetic Comparison of Two Levofloxacin Oral Formulations in Arabic Healthy Men.                                                                                  | Title             |
| 240 | Jeong E-J, Kang W-K, Kwon K-I. Bioequivalence of Cepirin Capsule to Suprax Capsule (Cefixime 100 mg). Journal of Pharmaceutical Investigation. 1999;29(2):145-149.                                                                        | Abstract          |
| 241 | Tctr. Bioequivalence Study of 100 mg Cefixime Capsules in Healthy Thai Volunteers. <a href="https://trialssearchwhoint/Trial2.aspx?TrialID=TCTR20170814002">https://trialssearchwhoint/Trial2.aspx?TrialID=TCTR20170814002</a> . 2017.    | Extensive reading |
| 242 | Nct. Bioequivalence Study of Cefixime Trihydrate Dry Syrup in Indonesia Healthy Volunteers. <a href="https://clinicaltrials.gov/show/NCT04982861">https://clinicaltrials.gov/show/NCT04982861</a> . 2021.                                 | Abstract          |

|     |                                                                                                                                                                                                                                                                                                     |          |
|-----|-----------------------------------------------------------------------------------------------------------------------------------------------------------------------------------------------------------------------------------------------------------------------------------------------------|----------|
| 243 | Zhang Y, He J-R, Wen A-D. Bioequivalency and pharmacokinetics of oral dispersion tablets of cefixime in healthy volunteers. CHINESE JOURNAL OF HOSPITAL PHARMACY. 2003;23(7):388-389.                                                                                                               | Abstract |
| 244 | Kang WK, Woo JS, Kwon KI. Bioequivalency on the Comparative Bioavailability of Two Capsule Formulations of Cefixime in Human Volunteers. Korean Journal of Clinical Pharmacy. 1998;8(1):19-22.                                                                                                      | Abstract |
| 245 | Ory J, Bricheux G, Robin F, et al. Biofilms in hospital effluents as a potential crossroads for carbapenemase-encoding strains. Science of The Total Environment. 2019 2019/03/20/;657:7-15.                                                                                                        | Title    |
| 246 | Regiel-Futyra A, Dąbrowski JM, Mazuryk O, et al. Bioinorganic antimicrobial strategies in the resistance era. Coordination Chemistry Reviews. 2017 2017/11/15/;351:76-117.                                                                                                                          | Title    |
| 247 | Babadi D, Dadashzadeh S, Osouli M, et al. Biopharmaceutical and pharmacokinetic aspects of nanocarrier-mediated oral delivery of poorly soluble drugs. Journal of Drug Delivery Science and Technology. 2021 2021/04/01/;62:102324.                                                                 | Title    |
| 248 | Leitner F, Pursiano T, Buck R, et al. BMY 28100, a new oral cephalosporin. Antimicrobial agents and chemotherapy. 1987;31(2):238-243.                                                                                                                                                               | Abstract |
| 249 | Jones RN, Barry AL. BMY-28100, a new oral cephalosporin: antimicrobial activity against nearly 7,000 recent clinical isolates, comparative potency with other oral agents, and activity against beta-lactamase producing isolates. Diagnostic microbiology and infectious disease. 1988;9(1):11-26. | Abstract |
| 250 | van Saene HKF, Percival A. Bowel microorganisms—a target for selective antimicrobial control. Journal of Hospital Infection. 1991 1991/09/01/;19:19-41.                                                                                                                                             | Title    |
| 251 | Mmeje OO, Qin JZ, Wetmore MK, et al. Breakdown in the expedited partner therapy treatment cascade: from reproductive healthcare provider to the pharmacist [Journal: Article]. American Journal of Obstetrics and Gynecology. 2020;223(3):417.e1-417.e8.                                            | Title    |

|     |                                                                                                                                                                                                                    |          |
|-----|--------------------------------------------------------------------------------------------------------------------------------------------------------------------------------------------------------------------|----------|
| 252 | Sharma P, Vyas M, Sharma N, et al. Brief overview of pharmacological therapy for urinary tract infections. 2018.                                                                                                   | Title    |
| 253 | Eltantawy MNM. Bromometric analysis of Lamotrigine, Minoxidil and Cefixime. Asian Pharma Press. 2012;2:22-28.                                                                                                      | Abstract |
| 254 | Shorr RI, Hoth AB, Rawls N, editors. Drugs for the Geriatric Patient. Philadelphia: W.B. Saunders; 2007. p. 173-320.                                                                                               | Title    |
| 255 | Studdert VP, Gay CC, Hinchcliff KW, editors. Saunders Comprehensive Veterinary Dictionary (Fifth Edition). St. Louis (MO): W.B. Saunders; 2021. p. 168-295.                                                        | Title    |
| 256 | Weiner CP, Buhimschi C. C. In: Weiner CP, Buhimschi C, editors. Drugs for Pregnant and Lactating Women (Second Edition). Philadelphia: W.B. Saunders; 2009. p. 120-251.                                            | Title    |
| 257 | SPRY DO, SNYDER NJ, KASHER JS. C (3)-cyclopropyl cepheems and carbacepheems. The Journal of Antibiotics. 1989;42(11):1653-1660.                                                                                    | Title    |
| 258 | Boone CM, Waterval JCM, Lingeman H, et al. Capillary electrophoresis as a versatile tool for the bioanalysis of drugs—a review. Journal of Pharmaceutical and Biomedical Analysis. 1999 1999/09/02/;20(6):831-863. | Title    |
| 259 | Levêque D, Gallion-Renault C, Monteil H, et al. Capillary electrophoresis for pharmacokinetic studies. Journal of Chromatography B: Biomedical Sciences and Applications. 1997;697(1-2):67-75.                     | Title    |
| 260 | Sánchez-Hernández L, Marina ML. Capillary Electrophoresis—Antibiotics. Reference Module in Chemistry, Molecular Sciences and Chemical Engineering: Elsevier; 2016.                                                 | Title    |
| 261 | Barre J. Caractéristiques pharmacocinétiques du céfixime. La Presse médicale (1983). 1989;18(32):1578-1582.                                                                                                        | Title    |
| 262 | Cooper RD. The carbacepheems: a new beta-lactam antibiotic class. The American journal of medicine. 1992;92(6):S2-S6.                                                                                              | Title    |

|     |                                                                                                                                                                                                                                                                                                                       |          |
|-----|-----------------------------------------------------------------------------------------------------------------------------------------------------------------------------------------------------------------------------------------------------------------------------------------------------------------------|----------|
| 263 | Tamai I, Tsuji A, Kin Y. Carrier-mediated transport of cefixime, a new cephalosporin antibiotic, via an organic anion transport system in the rat renal brush-border membrane. <i>J Pharmacol Exp Ther.</i> 1988 Jul;246(1):338-44.                                                                                   | Animal   |
| 264 | Łowicki D, Przybylski P. Cascade synthetic strategies opening access to medicinal-relevant aliphatic 3- and 4-membered N-heterocyclic scaffolds. <i>European Journal of Medicinal Chemistry.</i> 2022 2022/08/05/;238:114438.                                                                                         | Title    |
| 265 | Namoju R, Ismail M, Golla VK, et al. A case of acute generalized exanthematous pustulosis by cefixime with oral mucosal involvement. <i>Current Drug Safety.</i> 2020;15(3):236-239.                                                                                                                                  | Abstract |
| 266 | Masetti M, Magalotti D, Martino E, et al. A Case of Acute Liver Failure during Ritonavir-Boosted Paritaprevir, Ombitasvir and Dasabuvir Therapy in a Patient with HCV Genotype 1b Cirrhosis. <i>Journal of Gastrointestinal &amp; Liver Diseases.</i> 2016;25(4).                                                     | Title    |
| 267 | Dass P, Gulabani MM, Raikar S. A case of cefixime, ofloxacin combination tablet induced erythematous macules. <i>Indian Journal of Pharmacy Practice.</i> 2014;7(4).                                                                                                                                                  | Abstract |
| 268 | Naumann BD, Silverman KC, Dixit R, et al. Case studies of categorical data-derived adjustment factors. <i>Human and Ecological Risk Assessment: An International Journal.</i> 2001;7(1):61-105.                                                                                                                       | Title    |
| 269 | Arsalan A, Ahmad I, Ali SA. Cefaclor: clinical, biochemical, analytical and stability aspects. <i>Advances in medicine and biology.</i> 2017;123:1-52.                                                                                                                                                                | Title    |
| 270 | Appelbaum P. Cefdinir. <i>Clinical drug investigation.</i> 1995;9(3):54-64.                                                                                                                                                                                                                                           | Title    |
| 271 | Gerlach EH, Jones RN, Allen SD, et al. Cefdinir (FK482), an orally administered cephalosporin in vitro activity comparison against recent clinical isolates from five medical centers and determination of MIC quality control guidelines. <i>Diagnostic microbiology and infectious disease.</i> 1992;15(6):537-543. | Title    |

|     |                                                                                                                                                                                                                           |                |
|-----|---------------------------------------------------------------------------------------------------------------------------------------------------------------------------------------------------------------------------|----------------|
| 272 | Guay DRP. Cefdinir: An advanced-generation, broad-spectrum oral cephalosporin. <i>Clinical Therapeutics</i> . 2002 2002/04/01/;24(4):473-489.                                                                             | Title          |
| 273 | Jones RN, Pfaller MA, Jacobs MR, et al. Cefditoren in vitro activity and spectrum: a review of international studies using reference methods. <i>Diagn Microbiol Infect Dis</i> . 2001 Sep-Oct;41(1-2):1-14.              | Title          |
| 274 | Capparelli FJ, Diaz MF, Hlavnik A, et al. Cefepime- and cefixime-induced encephalopathy in a patient with normal renal function. <i>Neurology</i> . 2005 Dec 13;65(11):1840.                                              | Abstract       |
| 275 | Bryson HM, Brogden RN. Cefetamet pivoxil. <i>Drugs</i> . 1993;45(4):589-621.                                                                                                                                              | Title          |
| 276 | Blouin RA, Stoeckel K. Cefetamet pivoxil clinical pharmacokinetics. <i>Clinical pharmacokinetics</i> . 1993;25(3):172-188.                                                                                                | Title          |
| 277 | Kissling M. Cefetamet pivoxil: a review of clinical experience. <i>Médecine et Maladies Infectieuses</i> . 1992 1992/06/01/;22:565-575.                                                                                   | Title          |
| 278 | Cullmann W, Edwards DJ, Kissling M, et al. Cefetamet pivoxil: a review of its microbiology, toxicology, pharmacokinetics and clinical efficacy. <i>International journal of antimicrobial agents</i> . 1992;1(4):175-191. | Title          |
| 279 | Bryson HM, Brogden RN. Cefetamet pivoxil. A review of its antibacterial activity, pharmacokinetic properties and therapeutic use. <i>Drugs</i> . 1993 Apr;45(4):589-621.                                                  | Title          |
| 280 | Olszewski J. Cefiksym w leczeniu zapalenia zatok przynosowych i ucha środkowego—przegląd badań. <i>Świat Medycyny i Farmacji</i> . 2019 (10).                                                                             | Title          |
| 281 | Rafal'skiĭ VV, Divgan EV, Derevitskiĭ AV. [Cefixim: clinical pharmacology and role in therapy of urogenital infections]. <i>Urologiia</i> . 2011 Mar-Apr(2):63-6.                                                         | Not Accessible |
| 282 | Brogden RN, Campoli-Richards DM. Cefixime. <i>Drugs</i> . 1989;38(4):524-550.                                                                                                                                             | Title          |
| 283 | Castle SS. Cefixime. In: Enna SJ, Bylund DB, editors. <i>xPharm: The Comprehensive Pharmacology Reference</i> . New York: Elsevier; 2007. p. 1-5.                                                                         | Title          |



|     |                                                                                                                                                                          |       |
|-----|--------------------------------------------------------------------------------------------------------------------------------------------------------------------------|-------|
| 284 | Genvresse I, Carbon C. Cefixime. International Journal of Antimicrobial Agents. 1993;3(1):1-16.                                                                          | Title |
| 285 | Guay D. Cefixime. Kucers' The Use of Antibiotics: CRC Press; 2017. p. 539-547.                                                                                           | Title |
| 286 | Langer N. Cefixime. Compendium. 2002.                                                                                                                                    | Title |
| 287 | Leggett NJ, Caravaggio C, Rybak MJ. Cefixime. DICP. 1990;24(5):489-495.                                                                                                  | Title |
| 288 | Long SS. Cefixime. Pediatric Annals. 1993;22(3):177-186.                                                                                                                 | Title |
| 289 | Markham A, Brogden RN. Cefixime. Drugs. 1995;49(6):1007-1022.                                                                                                            | Title |
| 290 | Mogal P, Derle D. Cefixime. General, Class. 2017;4:2.                                                                                                                    | Title |
| 291 | Okeke CC, Srinivasan VS, Brittain HG. Cefixime. In: Brittain HG, editor. Analytical Profiles of Drug Substances and Excipients. Vol. 25: Academic Press; 1998. p. 39-83. | Title |
| 292 | Papich MG. Cefixime. In: Papich MG, editor. Papich Handbook of Veterinary Drugs (Fifth Edition). St. Louis (MO): W.B. Saunders; 2021. p. 143-145.                        | Title |
| 293 | 加地正伸, 斎藤篤, 嶋田甚五郎, et al. Cefixime (CFIX) にかんする臨床的研究. CHEMOTHERAPY. 1985;33(Supplement6):284-292.                                                                         | Title |
| 294 | 加藤政仁, 加藤錠一, 鈴木幹三, et al. Cefixime (CFIX) に関する基礎的・臨床的検討. Chemotherapy. 1985;33(Supplement6):367-376.                                                                      | Title |
| 295 | 島田馨, 稲松孝思, 浦山京子, et al. Cefixime (CFIX) の老年者における薬動力学的・臨床的研究. Chemotherapy. 1985;33(Supplement6):298-303.                                                                 | Title |
| 296 | 清水武昭, 関根理, 吉田奎介. Cefixime (CFIX) の胆汁内移行に関する検討および胆道感染症の治療経験. Chemotherapy. 1985;33(Supplement6):491-498.                                                                  | Title |

|     |                                                                                                                                                                                                                                                                  |                |
|-----|------------------------------------------------------------------------------------------------------------------------------------------------------------------------------------------------------------------------------------------------------------------|----------------|
| 297 | Crews K, Stewart C, Panetta J, et al. Cefixime (CFX) enables higher plasma exposures of SN-38 to be achieved in pediatric patients receiving oral irinotecan (IRN). <i>Clinical Pharmacology &amp; Therapeutics</i> . 2004;75(2):P77-P77.                        | Abstract       |
| 298 | ROCHE G. Cefixime (Oroken). <i>Concours médical (Paris)</i> . 1989;111(39):3477-3482.                                                                                                                                                                            | Title          |
| 299 | Furman WL, Crews KR, Billups C, et al. Cefixime allows greater dose escalation of oral irinotecan: a phase I study in pediatric patients with refractory solid tumors. <i>Journal of clinical oncology</i> . 2006;24(4):563-570.                                 | Abstract       |
| 300 | Yesmin F, Islam S. Cefixime and Metals Complex Interaction: A systemic review on Drug-metals interaction<br>J. <i>Pharmaceutics and Pharmacology Research</i> . 2020;3(1).                                                                                       | Title          |
| 301 | Kumar S, Nirmal K, Nirmal AK, et al. Cefixime and Ofloxacin fixed dose combination induced petechial rash: a case report. <i>International Journal of Basic &amp; Clinical Pharmacology</i> . 2017;6(1):211.                                                     | Abstract       |
| 302 | Morita M, Nakagawa H, Suzuki K. [Cefixime concentration in human prostatic tissue following 3-days of administration]. <i>Hinyokika Kyo</i> . 1991 Nov;37(11):1581-4.                                                                                            | Not Accessible |
| 303 | Karimian N, Gholivand M, Malekzadeh G. Cefixime detection by a novel electrochemical sensor based on glassy carbon electrode modified with surface imprinted polymer/multiwall carbon nanotubes. <i>Journal of Electroanalytical Chemistry</i> . 2016;771:64-72. | Abstract       |
| 304 | CRISTOFARO G, GALIANO R, CAPILLO S, et al. Cefixime for the prophylaxis of urinary tract infections in children with malformative uropathies: an open study.                                                                                                     | Abstract       |
| 305 | Fiscella RG, Chow JM. Cefixime for treatment of maxillary sinusitis. <i>American Journal of Rhinology</i> . 1991;5(5):193-197.                                                                                                                                   | Abstract       |
| 306 | Egorova O, Kozlov S. CEFIXIME IN MANAGEMENT OF ENT INFECTIONS IN CHILDREN. <i>Current Pediatrics</i> . 2015;7(3):52-57.                                                                                                                                          | Abstract       |

|     |                                                                                                                                                                                                                 |                   |
|-----|-----------------------------------------------------------------------------------------------------------------------------------------------------------------------------------------------------------------|-------------------|
| 307 | Quintiliani R. Cefixime in the treatment of patients with lower respiratory tract infections: results of US clinical trials. <i>Clinical therapeutics</i> . 1996;18(3):373-390.                                 | Abstract          |
| 308 | Fanos V, Cataldi L. Cefixime in urinary tract infections with special reference to pediatrics: overview. <i>Journal of chemotherapy</i> . 2001;13(2):112-117.                                                   | Abstract          |
| 309 | Naber K. Cefixime in urinary tract infections.(Specific studies and literature review). <i>Infection</i> . 1990;18:S132-9.                                                                                      | Title             |
| 310 | LP H, Racht E. Cefixime may be given with an aluminium-magnesium antacid. <i>InPharma</i> . 1989.                                                                                                               | Abstract          |
| 311 | Capelli O, Bonucchi M, Ragno T, et al. Cefixime once-a-day in the treatment of lower respiratory tract infections in adults. <i>Journal of chemotherapy (Florence, Italy)</i> . 1989;1(4 Suppl):775-778.        | Abstract          |
| 312 | Leroy A, Oser B, Grise P, et al. Cefixime penetration in human renal parenchyma. <i>Antimicrobial agents and chemotherapy</i> . 1995;39(6):1240-1242.                                                           | Abstract          |
| 313 | Backhaus A, Tinzl J. Cefixime therapy in patients with proven gonorrhoea. <i>Infection</i> . 1990;18:S145-6.                                                                                                    | Abstract          |
| 314 | Natarajan R, Rajendran NN. Cefixime trihydrate loaded chitosan-alginate transdermal patches. <i>World Journal of Pharmaceutical Sciences</i> . 2014;997-1008.                                                   | Abstract          |
| 315 | Samarinas M, Skriapas K, Mitsogiannis I, et al. Cefixime versus prulifloxacin as a prophylactic treatment for prostate biopsy: a randomized study. <i>Central European Journal of Urology</i> . 2020;73(4):544. | Extensive reading |
| 316 | Cox CE. Cefixime versus trimethoprim/sulfamethoxazole in treatment of patients with acute, uncomplicated lower urinary tract infections. <i>Urology</i> . 1989;34(5):322-326.                                   | Abstract          |
| 317 | Principi N, Marchisio P. Cefixime vs amoxicillin in the treatment of acute otitis media in infants and children. <i>Drugs</i> . 1991;42(4):25-29.                                                               | Abstract          |

|     |                                                                                                                                                                                                                                                               |          |
|-----|---------------------------------------------------------------------------------------------------------------------------------------------------------------------------------------------------------------------------------------------------------------|----------|
| 318 | 김형기, 권준택, 손동렬, et al. Cefixime 경구제제의 생물학적 동등성 연구. 순천향의대논문집.<br>2004;10(1):77-80.                                                                                                                                                                              | Title    |
| 319 | 구강은, 여러, 종류의, et al. Cefixime 의 치주병원성 세균 6 종에 대한 항균 효과. 대한치주과학회지:<br>Vol. 2005;35(2).                                                                                                                                                                         | Title    |
| 320 | 徳間洋二, 関口正己, 藤原友一, et al. Cefixime のラットにおける吸収, 分布, 排せつ, 代謝. 薬物動態.<br>1987;2(6):637-648.                                                                                                                                                                        | Title    |
| 321 | Iakovlev V. Cefixime--a new cephalosporin antibiotic for oral administration. Antibiotiki i khimioterapiia=<br>Antibiotics and chemotherapy [sic]. 1994;39(1):51-62.                                                                                          | Abstract |
| 322 | Cefixime--a new oral cephalosporin. Med Lett Drugs Ther. 1989 Aug 11;31(798):73-5.                                                                                                                                                                            | Abstract |
| 323 | Kumar V, Kalaiselvan V, Kumar AP, et al. Cefixime-associated acute generalized exanthematous pustulosis:<br>Rare cases in India. Indian Journal of Pharmacology. 2018;50(4):204.                                                                              | Abstract |
| 324 | Taheri-Ledari R, Fazeli A, Kashtiaray A, et al. Cefixime-Containing Silica Nanoseeds Coated by a Hybrid<br>PVA-Gold Network with a Cys-Arg Dipeptide Conjugation: Enhanced Antimicrobial and Drug Release<br>Properties. Langmuir. 2022 Jan 11;38(1):132-146. | Abstract |
| 325 | Taheri-Ledari R, Fazeli A, Kashtiaray A, et al. Cefixime-Containing Silica Nanoseeds Coated by a Hybrid<br>PVA-Gold Network with a Cys-Arg Dipeptide Conjugation: Enhanced Antimicrobial and Drug Release<br>Properties. Langmuir. 2021;38(1):132-146.        | Abstract |
| 326 | Mirshahi R, Sardarinia M, Nilforushan N. Cefixime-induced angle closure and transient myopic shift in a<br>healthy individual; A case report. American Journal of Ophthalmology Case Reports. 2020;20:100903.                                                 | Abstract |
| 327 | Al Haboob AAN. Cefixime-induced hepatotoxicity and acute renal failure: a case report. European Journal of<br>Medical Case Reports. 2018;2(2):55-58.                                                                                                          | Abstract |

|     |                                                                                                                                                                                                                          |                |
|-----|--------------------------------------------------------------------------------------------------------------------------------------------------------------------------------------------------------------------------|----------------|
| 328 | Anzellotti F, Ricciardi L, Monaco D, et al. Cefixime-induced nonconvulsive status epilepticus. Neurological Sciences. 2012;33(2):325-329.                                                                                | Abstract       |
| 329 | Bayram E, Bayram MT, Hiz S, et al. Cefixime-induced oculogyric crisis. Pediatric emergency care. 2012;28(1):55-56.                                                                                                       | Abstract       |
| 330 | Quintiliani R. Cefixime: a pharmacoeconomic perspective. Current therapeutic research. 1996;57(12):892-912.                                                                                                              | Abstract       |
| 331 | Ashraf MM, Javed I, Aslam B, et al. CEFIXIME: DISPOSITION KINETICS AND BIOAVAILABILITY COMPARISON OF TWO FORMULATIONS OF CEFIXIME IN HEALTHY ADULT MALE SUBJECTS. The Professional Medical Journal. 2015;22(07):959-965. | Not Accessible |
| 332 | Naber K, Kees F, Linden K. Cefixime: in vitro activity, pharmacokinetics. clinical efficacy and safety in the treatment of complicated UTIs. Adv Exp Clin Res. 1988;1:61-70.                                             | Abstract       |
| 333 | Brogden RN, Campoli-Richards DM. Cefixime. A review of its antibacterial activity. Pharmacokinetic properties and therapeutic potential. Drugs. 1989 Oct;38(4):524-50.                                                   | Title          |
| 334 | Markham A, Brogden RN. Cefixime. A review of its therapeutic efficacy in lower respiratory tract infections. Drugs. 1995 Jun;49(6):1007-22.                                                                              | Title          |
| 335 | Di Nola F, Arione R, Bramato C. [Cefixime. Microbiologic, kinetic and clinical profile]. Minerva Med. 1991 Oct;82(10):633-56.                                                                                            | Not Accessible |
| 336 | Imada A, Hirai S. Cefotiam hexetil. International Journal of Antimicrobial Agents. 1995 1995/04/01/;5(2):85-99.                                                                                                          | Title          |
| 337 | Del Beccaro MA. Cefpodoxime proxetil. Pediatric Annals. 1993;22(3):187-196.                                                                                                                                              | Title          |
| 338 | Frampton JE, Brogden RN, Langtry HD, et al. Cefpodoxime proxetil. Drugs. 1992;44(5):889-917.                                                                                                                             | Title          |
| 339 | Fulton B, Perry CM. Cefpodoxime proxetil. Paediatric drugs. 2001;3(2):137-158.                                                                                                                                           | Title          |

|     |                                                                                                                                                                                                                                                                                         |        |
|-----|-----------------------------------------------------------------------------------------------------------------------------------------------------------------------------------------------------------------------------------------------------------------------------------------|--------|
| 340 | Papich MG. Cefpodoxime Proxetil. In: Papich MG, editor. Papich Handbook of Veterinary Drugs (Fifth Edition). St. Louis (MO): W.B. Saunders; 2021. p. 152-154.                                                                                                                           | Title  |
| 341 | Crauste-Manciet S, Huneau JF, Decroix MO, et al. Cefpodoxime proxetil esterase activity in rabbit small intestine: A role in the partial cefpodoxime absorption. International Journal of Pharmaceutics. 1997 1997/04/28/;149(2):241-249.                                               | Animal |
| 342 | Todd WM. Cefpodoxime proxetil: a comprehensive review. International Journal of Antimicrobial Agents. 1994 1994/03/01/;4(1):37-62.                                                                                                                                                      | Title  |
| 343 | Fulton B, Perry CM. Cefpodoxime proxetil: a review of its use in the management of bacterial infections in paediatric patients. Paediatr Drugs. 2001;3(2):137-58.                                                                                                                       | Title  |
| 344 | Frampton JE, Brogden RN, Langtry HD, et al. Cefpodoxime proxetil. A review of its antibacterial activity, pharmacokinetic properties and therapeutic potential. Drugs. 1992 Nov;44(5):889-917.                                                                                          | Title  |
| 345 | Aggarwal A, Rath S. Cefpodoxime—utility in respiratory tract infections and typhoid fever. The Indian Journal of Pediatrics. 2004;71(5):413-415.                                                                                                                                        | Title  |
| 346 | Chugh K, Agrawal S. Cefpodoxime: pharmacokinetics and therapeutic uses. The Indian Journal of Pediatrics. 2003;70(3):227-231.                                                                                                                                                           | Title  |
| 347 | Wiseman LR, Benfield P. Cefprozil. Drugs. 1993;45(2):295-317.                                                                                                                                                                                                                           | Title  |
| 348 | Bhargava S, Lodha R, Kabra S. Cefprozil: A review. The Indian Journal of Pediatrics. 2003;70(5):395-400.                                                                                                                                                                                | Title  |
| 349 | Wiseman LR, Benfield P. Cefprozil. A review of its antibacterial activity, pharmacokinetic properties, and therapeutic potential. Drugs. 1993 Feb;45(2):295-317.                                                                                                                        | Title  |
| 350 | Jones R, Barry A. Ceftibuten (7432-S, SCH 39720): comparative antimicrobial activity against 4735 clinical isolates, beta-lactamase stability and broth microdilution quality control guidelines. European Journal of Clinical Microbiology and Infectious Diseases. 1988;7(6):802-807. | Title  |

|     |                                                                                                                                                                                                                                                                                                                                              |          |
|-----|----------------------------------------------------------------------------------------------------------------------------------------------------------------------------------------------------------------------------------------------------------------------------------------------------------------------------------------------|----------|
| 351 | Bauernfeind A. Ceftibuten and bactericidal kinetics comparative in vitro activity against enterobacteriaceae producing extended spectrum $\beta$ -lactamases. Diagnostic microbiology and infectious disease. 1991;14(1):89-92.                                                                                                              | Title    |
| 352 | Kearns GL, Young RA. Ceftibuten pharmacokinetics and pharmacodynamics. Clinical pharmacokinetics. 1994;26(3):169-189.                                                                                                                                                                                                                        | Title    |
| 353 | Lo JY, Ho K, Leung AO, et al. Ceftibuten resistance and treatment failure of Neisseria gonorrhoeae infection. Antimicrobial agents and chemotherapy. 2008;52(10):3564-3567.                                                                                                                                                                  | Title    |
| 354 | Herrera-Hidalgo L, Gil-Navarro M, Penchala SD, et al. Ceftriaxone pharmacokinetics by a sensitive and simple LC-MS/MS method: development and application. Journal of Pharmaceutical and Biomedical Analysis. 2020;189:113484.                                                                                                               | Title    |
| 355 | Unemo á, Golparian D, Hestner A. Ceftriaxone treatment failure of pharyngeal gonorrhoea verified by international recommendations, Sweden, July 2010. Eurosurveillance. 2011;16(6):19792.                                                                                                                                                    | Title    |
| 356 | Anacona JR, Santaella J, Al-shemary RKR, et al. Ceftriaxone-based Schiff base transition metal(II) complexes. Synthesis, characterization, bacterial toxicity, and DFT calculations. Enhanced antibacterial activity of a novel Zn(II) complex against S. aureus and E. coli. Journal of Inorganic Biochemistry. 2021 2021/10/01;223:111519. | Title    |
| 357 | Dellamonica P. Cefuroxime axetil. International Journal of Antimicrobial Agents. 1994 1994/03/01;4(1):23-36.                                                                                                                                                                                                                                 | Title    |
| 358 | Christian SS, Christian JS. The cephalosporin antibiotics. Primary Care Update for OB/GYNS. 1997 1997/09/01;4(5):168-174.                                                                                                                                                                                                                    | Abstract |

|     |                                                                                                                                                                                                                                         |          |
|-----|-----------------------------------------------------------------------------------------------------------------------------------------------------------------------------------------------------------------------------------------|----------|
| 359 | Ribeiro AR, Sures B, Schmidt TC. Cephalosporin antibiotics in the aquatic environment: A critical review of occurrence, fate, ecotoxicity and removal technologies. Environmental Pollution. 2018<br>2018/10/01/;241:1153-1166.         | Title    |
| 360 | Alqahtani YS, Alyami BA, Alqarni AO, et al. Cephalosporin as Potent Urease and Tyrosinase Inhibitor: Exploration through Enzyme Inhibition, Kinetic Mechanism, and Molecular Docking Studies. BioMed Research International. 2022;2022. | Abstract |
| 361 | Chisholm SA, Mouton JW, Lewis DA, et al. Cephalosporin MIC creep among gonococci: time for a pharmacodynamic rethink? Journal of antimicrobial chemotherapy. 2010;65(10):2141-2148.                                                     | Abstract |
| 362 | Shoaib MH, Naqvi SBS, Sheikh D, et al. Cephalosporin resistance and $\beta$ -lactamase production in clinical isolates of Staphylococcus aureus in Karachi. Pakistan Journal of Pharmaceutical Sciences. 2001;14(2):23-32.              | Abstract |
| 363 | Parish LC, Witkowski JA. Cephalosporin therapy in dermatologic practice. Clinics in Dermatology. 1991<br>1991/10/01/;9(4):459-469.                                                                                                      | Abstract |
| 364 | DePestel DD, Benninger MS, Danziger L, et al. Cephalosporin use in treatment of patients with penicillin allergies. Journal of the American Pharmacists Association. 2008 2008/07/01/;48(4):530-540.                                    | Abstract |
| 365 | Kirkcaldy RD, Bolan GA, Wasserheit JN. Cephalosporin-resistant gonorrhea in North America. JAMA. 2013;309(2):185-187.                                                                                                                   | Abstract |
| 366 | Bryan JP. Cephalosporins and carbapenems. Current Opinion in Infectious Diseases. 1991;4(6):727-741.                                                                                                                                    | Abstract |
| 367 | Del Rosso JQ. Cephalosporins in dermatology. Clinics in Dermatology. 2003 2003/01/01/;21(1):24-32.                                                                                                                                      | Abstract |
| 368 | Del Rosso JQ. Cephalosporins in dermatology. Disease-a-Month. 2004 2004/06/01/;50(6):315-331.                                                                                                                                           | Abstract |
| 369 | Frigo N, Guchev I, Sidorenko S, et al. Cephalosporins of the third generation for the treatment of gonorrhea. Vestnik dermatologii i venerologii. 2011;87(3):34-44.                                                                     | Abstract |



|     |                                                                                                                                                                                                                                                    |       |
|-----|----------------------------------------------------------------------------------------------------------------------------------------------------------------------------------------------------------------------------------------------------|-------|
| 370 | Harrison CJ, Bratcher D. Cephalosporins: a review. <i>Pediatrics in review</i> . 2008;29(8):264-273.                                                                                                                                               | Title |
| 371 | Shahbaz K. Cephalosporins: pharmacology and chemistry. <i>Pharmaceutical and Biological Evaluations</i> . 2017.                                                                                                                                    | Title |
| 372 | NH H, II I, OCH I. CH <sub>2</sub> -S N.                                                                                                                                                                                                           | Title |
| 373 | Hamacher J, Luepke J, Reidenberg BE, et al. Changes in fecal flora and comparative multiple-dose pharmacokinetics of ceftibuten, cefpodoxime proxetil and amoxicillin/clavulanate. <i>Clinical microbiology and infection</i> . 1999;5(6):339-354. | Title |
| 374 | Chapitre 15 - Infectiologie. In: Jonville-Béra A-P, Vial T, editors. <i>Médicaments et Grossesse : Prescrire et évaluer le Risque</i> . Paris: Elsevier Masson; 2012. p. 117-156.                                                                  | Title |
| 375 | Bourrillon A. Chapitre 18 - Pathologies infectieuses. In: Bourrillon A, editor. <i>Pédiatrie (Sixième Édition)</i> . Paris: Elsevier Masson; 2011. p. 427-539.                                                                                     | Title |
| 376 | Tungland B. Chapter 1 - Gut Microbiota, Early Colonization and Factors in its Development that Influence Health. In: Tungland B, editor. <i>Human Microbiota in Health and Disease</i> : Academic Press; 2018. p. 1-35.                            | Title |
| 377 | Davis JL. Chapter 2 - Pharmacologic Principles. In: Reed SM, Bayly WM, Sellon DC, editors. <i>Equine Internal Medicine (Fourth Edition)</i> : W.B. Saunders; 2018. p. 79-137.                                                                      | Title |
| 378 | Dasgupta A. Chapter 3 - Advances in antibiotic measurement. In: Makowski GS, editor. <i>Advances in Clinical Chemistry</i> . Vol. 56: Elsevier; 2012. p. 75-104.                                                                                   | Title |
| 379 | Rehman K, Pervaiz W, Victor F, et al. Chapter 3 - Antibiotics' presence in hospitals and associated wastes. In: Hashmi MZ, editor. <i>Antibiotics and Antimicrobial Resistance Genes in the Environment</i> . Vol. 1: Elsevier; 2020. p. 28-38.    | Title |
| 380 | Choudhary D, Goykar H, Kalyane D, et al. Chapter 3 - Dose, dosage regimen, and dose adjustment in organ failure. In: Tekade RK, editor. <i>Biopharmaceutics and Pharmacokinetics Considerations</i> . Vol. 1: Academic Press; 2021. p. 29-82.      | Title |

|     |                                                                                                                                                                                                                                                                                        |       |
|-----|----------------------------------------------------------------------------------------------------------------------------------------------------------------------------------------------------------------------------------------------------------------------------------------|-------|
| 381 | Simonazzi A, Cid AG, Villegas M, et al. Chapter 3 - Nanotechnology applications in drug controlled release. In: Grumezescu AM, editor. Drug Targeting and Stimuli Sensitive Drug Delivery Systems: William Andrew Publishing; 2018. p. 81-116.                                         | Title |
| 382 | Mir MA, Nabi B, Ahlawat S, et al. Chapter 4 - Combating human bacterial infections: need for new antibacterial drugs and therapeutics. In: Mir MA, editor. Human Pathogenic Microbes: Academic Press; 2022. p. 71-102.                                                                 | Title |
| 383 | Landowski CP, Suzuki Y, Hediger MA. CHAPTER 4 - The Mammalian Transporter Families. In: Alpern RJ, Hebert SC, editors. Seldin and Giebisch's The Kidney (Fourth Edition). San Diego: Academic Press; 2008. p. 91-146.                                                                  | Title |
| 384 | Norrby SR. CHAPTER 5 - Antimicrobial agents and the kidneys. In: Finch RG, Greenwood D, Norrby SR, et al., editors. Antibiotic and Chemotherapy (Ninth Edition). London: W.B. Saunders; 2010. p. 60-67.                                                                                | Title |
| 385 | Nasrollahzadeh M, Bidgoli NSS, Soleimani F, et al. Chapter 5 - Biomedical applications of biopolymer-based (nano)materials. In: Nasrollahzadeh M, editor. Biopolymer-Based Metal Nanoparticle Chemistry for Sustainable Applications: Elsevier; 2021. p. 189-332.                      | Title |
| 386 | Gumustas M, Sengel-Turk CT, Gumustas A, et al. Chapter 5 - Effect of Polymer-Based Nanoparticles on the Assay of Antimicrobial Drug Delivery Systems. In: Grumezescu AM, editor. Multifunctional Systems for Combined Delivery, Biosensing and Diagnostics: Elsevier; 2017. p. 67-108. | Title |
| 387 | Bartlett JD. Chapter 5 - Pharmacotherapeutic agents: basic principles and clinical applications. In: Stapleton F, editor. The Anterior Eye and Therapeutics. London: Butterworth-Heinemann; 2003. p. 166-207.                                                                          | Title |
| 388 | Yaneva Z, Georgieva N. Chapter 5 - Physicochemical and morphological characterization of pharmaceutical nanocarriers and mathematical modeling of drug encapsulation/release mass transfer processes. In:                                                                              | Title |

|     |                                                                                                                                                                                                                                                                                                                    |       |
|-----|--------------------------------------------------------------------------------------------------------------------------------------------------------------------------------------------------------------------------------------------------------------------------------------------------------------------|-------|
|     | Grumezescu AM, editor. Nanoscale Fabrication, Optimization, Scale-Up and Biological Aspects of Pharmaceutical Nanotechnology: William Andrew Publishing; 2018. p. 173-218.                                                                                                                                         |       |
| 389 | Rai M, Kon K, Gade A, et al. Chapter 6 - Antibiotic Resistance: Can Nanoparticles Tackle the Problem? In: Kon K, Rai M, editors. Antibiotic Resistance: Academic Press; 2016. p. 121-143.                                                                                                                          | Title |
| 390 | Padmanaban G, Nagaraj VA. Chapter 6 - Curcumin From Turmeric as an Adjunct Drug? In: Atta ur R, editor. Studies in Natural Products Chemistry. Vol. 57: Elsevier; 2018. p. 179-202.                                                                                                                                | Title |
| 391 | Nicolle LE. Chapter 6 - Use of Quinolones in Urinary Tract Infection and Prostatitis. In: Andriole VT, editor. The Quinolones (Third Edition). San Diego: Academic Press; 2000. p. 203-225.                                                                                                                        | Title |
| 392 | Wanger A, Chavez V, Huang RSP, et al. Chapter 7 - Antibiotics, Antimicrobial Resistance, Antibiotic Susceptibility Testing, and Therapeutic Drug Monitoring for Selected Drugs. In: Wanger A, Chavez V, Huang RSP, et al., editors. Microbiology and Molecular Diagnosis in Pathology: Elsevier; 2017. p. 119-153. | Title |
| 393 | Alvarez-Elcoro S, Yao JDC. Chapter 7 - Antimicrobial Macrolides in Clinical Practice*. In: Ōmura S, editor. Macrolide Antibiotics (Second Edition). San Diego: Academic Press; 2003. p. 363-402.                                                                                                                   | Title |
| 394 | Garnero C, Zoppi A, Aloisio C, et al. Chapter 7 - Technological delivery systems to improve biopharmaceutical properties. In: Grumezescu AM, editor. Nanoscale Fabrication, Optimization, Scale-Up and Biological Aspects of Pharmaceutical Nanotechnology: William Andrew Publishing; 2018. p. 253-299.           | Title |
| 395 | Gupta N, Rai DB, Jangid AK, et al. Chapter 7 - Use of nanotechnology in antimicrobial therapy. In: Gurtler V, Ball AS, Soni S, editors. Methods in Microbiology. Vol. 46: Academic Press; 2019. p. 143-172.                                                                                                        | Title |
| 396 | DiCarlo RP, Martin DH. Chapter 7 - Use of the Quinolones in Sexually Transmitted Diseases. In: Andriole VT, editor. The Quinolones (Third Edition). San Diego: Academic Press; 2000. p. 227-254.                                                                                                                   | Title |
| 397 | Brunner M, Müller M. Chapter 7.1 Microdialysis in clinical drug delivery studies. In: Westerink BHC, Cremers TIFH, editors. Handbook of Behavioral Neuroscience. Vol. 16: Elsevier; 2006. p. 625-644.                                                                                                              | Title |

|     |                                                                                                                                                                                                                                                                                                     |       |
|-----|-----------------------------------------------------------------------------------------------------------------------------------------------------------------------------------------------------------------------------------------------------------------------------------------------------|-------|
| 398 | Maddison JE, Watson ADJ, Elliott J. Chapter 8 - Antibacterial drugs. In: Maddison JE, Page SW, Church DB, editors. Small Animal Clinical Pharmacology (Second Edition). Edinburgh: W.B. Saunders; 2008. p. 148-185.                                                                                 | Title |
| 399 | Sykes JE, Papich MG. Chapter 8 - Antibacterial Drugs. In: Sykes JE, editor. Canine and Feline Infectious Diseases. Saint Louis: W.B. Saunders; 2014. p. 66-86.                                                                                                                                      | Title |
| 400 | Chauhan S, Jain K, Naqvi S. Chapter 8 - Dendrimers and its theranostic applications in infectious diseases. In: Jain K, Ahmad J, editors. Nanotheranostics for Treatment and Diagnosis of Infectious Diseases: Academic Press; 2022. p. 199-228.                                                    | Title |
| 401 | Memon N, Laghari SH, Qureshi T, et al. Chapter 9 - Quantum Dots Coated with Molecularly Imprinted Polymer as Probes for Environmentally and Medicinally Important Analytes. In: Denizli A, editor. Molecular Imprinting for Nanosensors and Other Sensing Applications: Elsevier; 2021. p. 223-253. | Title |
| 402 | Campbell KB. Chapter 10 - Antimicrobial agents and torsades de pointes. In: Tisdale JE, editor. Torsades de Pointes: Academic Press; 2022. p. 231-266.                                                                                                                                              | Title |
| 403 | Misra SK, Pathak K. Chapter 10 - Drug nanocrystals as drug delivery systems. In: Mallakpour S, Hussain CM, editors. Industrial Applications of Nanocrystals: Elsevier; 2022. p. 153-178.                                                                                                            | Title |
| 404 | McLawhon RW. Chapter 10 - Guidelines for the Monitoring of Vancomycin, Aminoglycosides and Certain Antibiotics. In: Dasgupta A, editor. Therapeutic Drug Monitoring. Boston: Academic Press; 2012. p. 197-218.                                                                                      | Title |
| 405 | Kaur A, Dang S. Chapter 10 - Synergistic combination of phytotherapeutics for infectious diseases. In: Baboota S, Ali J, editors. Nanocarriers for the Delivery of Combination Drugs: Elsevier; 2021. p. 337-392.                                                                                   | Title |

|     |                                                                                                                                                                                                                                                                                                                    |       |
|-----|--------------------------------------------------------------------------------------------------------------------------------------------------------------------------------------------------------------------------------------------------------------------------------------------------------------------|-------|
| 406 | Hamer DH, Gorbach SL. Chapter 10 - Use of the Quinolones for Treatment and Prophylaxis of Bacterial Gastrointestinal Infections. In: Andriole VT, editor. The Quinolones (Third Edition). San Diego: Academic Press; 2000. p. 303-323.                                                                             | Title |
| 407 | Yolton DP, Haesaert SP. Chapter 11 - Anti-Infective Drugs. In: Bartlett JD, Jaanus SD, Fiscella RG, et al., editors. Clinical Ocular Pharmacology (Fifth Edition). Saint Louis: Butterworth-Heinemann; 2008. p. 175-220.                                                                                           | Title |
| 408 | Heck JV. Chapter 11. Antibacterial Agents. In: Allen RC, editor. Annual Reports in Medicinal Chemistry. Vol. 24: Academic Press; 1989. p. 101-110.                                                                                                                                                                 | Title |
| 409 | Momper JD, Best BM. Chapter 12 - Clinical pharmacology of anti-infectives during pregnancy. In: Mattison D, Halbert L-A, editors. Clinical Pharmacology During Pregnancy (Second Edition). Boston: Academic Press; 2022. p. 177-202.                                                                               | Title |
| 410 | Neofytos D, El-Beyrouty C, DeSimone JA. CHAPTER 12 - PHARMACOBIOLOGY OF INFECTIONS. In: Waldman SA, Terzic A, Egan LJ, et al., editors. Pharmacology and Therapeutics. Philadelphia: W.B. Saunders; 2009. p. 173-191.                                                                                              | Title |
| 411 | Gallagher JJ, Williams-Bouyer N, Villarreal C, et al. Chapter 12 - Treatment of infection in burns. In: Herndon DN, editor. Total Burn Care (Third Edition). Edinburgh: W.B. Saunders; 2007. p. 136-176.                                                                                                           | Title |
| 412 | Farrington M. Chapter 13 - Antibacterial drugs. In: Bennett PN, Brown MJ, Sharma P, editors. Clinical Pharmacology (Eleventh Edition). Oxford: Churchill Livingstone; 2012. p. 173-190.                                                                                                                            | Title |
| 413 | Isoherranen N, Burbacher TM. CHAPTER 13 - The Use of Nonhuman Primates in Evaluating the Safety of Therapeutic Medications Used During Pregnancy. In: Burbacher TM, Sackett GP, Grant KS, editors. Primate Models of Children's Health and Developmental Disabilities. New York: Academic Press; 2008. p. 325-375. | Title |

|     |                                                                                                                                                                                                                                                                       |       |
|-----|-----------------------------------------------------------------------------------------------------------------------------------------------------------------------------------------------------------------------------------------------------------------------|-------|
| 414 | Telekes A, HegedŰS M, Kiss I. Chapter 13 - Therapeutic drug monitoring and measurement of drug concentrations using mass spectrometry. In: V  key K, Telekes A, Vertes A, editors. Medical Applications of Mass Spectrometry. Amsterdam: Elsevier; 2008. p. 263-289.  | Title |
| 415 | Greenwood D. CHAPTER 13 - $\beta$ -Lactam antibiotics: cephalosporins. In: Finch RG, Greenwood D, Norrby SR, et al., editors. Antibiotic and Chemotherapy (Ninth Edition). London: W.B. Saunders; 2010. p. 170-199.                                                   | Title |
| 416 | Brighty KE, McGuirk PR. Chapter 13. Antibacterial Agents. In: Bristol JA, editor. Annual Reports in Medicinal Chemistry. Vol. 26: Academic Press; 1991. p. 123-132.                                                                                                   | Title |
| 417 | Walsh TF. Chapter 13. Beta-Lactam Antibiotics. In: Allen RC, editor. Annual Reports in Medicinal Chemistry. Vol. 23: Academic Press; 1988. p. 121-131.                                                                                                                | Title |
| 418 | Thielman NM, Guerrant RL, Weller PF, et al. Chapter 14 - Chemotherapy of Bacterial, Fungal, and Viral Diseases. In: Guerrant RL, Walker DH, Weller PF, editors. Tropical Infectious Diseases (Second Edition). Philadelphia: Churchill Livingstone; 2006. p. 169-194. | Title |
| 419 | Savoia MC. Chapter 16 - Bacterial, Fungal, and Parasitic Disease. In: Burrow GN, Duffy TP, Copel JA, editors. Medical Complications During Pregnancy (Sixth Edition). Philadelphia: W.B. Saunders; 2004. p. 305-345.                                                  | Title |
| 420 | Krishnamurthy A, Palombo E. Chapter 17 - Current therapeutics and prophylactic approaches to treat pneumonia. In: Kon K, Rai M, editors. The Microbiology of Respiratory System Infections. Vol. 1: Academic Press; 2016. p. 263-279.                                 | Title |
| 421 | Naveed M, Chaudhry Z, Bukhari SA, et al. Chapter 19 - Antibiotics resistance mechanism. In: Hashmi MZ, editor. Antibiotics and Antimicrobial Resistance Genes in the Environment. Vol. 1: Elsevier; 2020. p. 292-312.                                                 | Title |

|     |                                                                                                                                                                                                                                                                   |       |
|-----|-------------------------------------------------------------------------------------------------------------------------------------------------------------------------------------------------------------------------------------------------------------------|-------|
| 422 | Gökaltun A, Çetin K, Alharthi S, et al. Chapter 19 - Chromatographic nano-column technology and its application in beverage analysis. In: Amrane A, Rajendran S, Nguyen TA, et al., editors. Nanotechnology in the Beverage Industry: Elsevier; 2020. p. 549-584. | Title |
| 423 | dos Santos CA, Rai M, de Oliveira JM, et al. Chapter 19 - Curcumin and related antioxidants: applications to tissue pathology. In: Preedy VR, editor. Pathology: Academic Press; 2020. p. 197-204.                                                                | Title |
| 424 | Klein JO, Bluestone CD. CHAPTER 19 - OTITIS MEDIA. In: Feigin RD, Cherry JD, Demmler-Harrison GJ, et al., editors. Feigin and Cherry's Textbook of Pediatric Infectious Diseases (Sixth Edition). Philadelphia: W.B. Saunders; 2009. p. 216-237.                  | Title |
| 425 | DiVall MV, Ziegler KA. Chapter 19 - Pharmacologic Agents. In: Paz JC, West MP, editors. Acute Care Handbook for Physical Therapists (Fourth Edition). St. Louis: W.B. Saunders; 2014. p. 409-450.                                                                 | Title |
| 426 | Maheshwari R, Kuche K, Mane A, et al. Chapter 20 - Manipulation of Physiological Processes for Pharmaceutical Product Development. In: Tekade RK, editor. Dosage Form Design Considerations: Academic Press; 2018. p. 701-729.                                    | Title |
| 427 | Tambe V, Pande S, Gadeval A, et al. Chapter 20 - Microdialysis: an emerging technique for pharmacokinetic–pharmacodynamic profiling. In: Tekade RK, editor. Biopharmaceutics and Pharmacokinetics Considerations. Vol. 1: Academic Press; 2021. p. 601-616.       | Title |
| 428 | Mackell SM, Anderson SA. Chapter 20 - The Pregnant and Breast-feeding Traveler. In: Keystone JS, Kozarsky PE, Freedman DO, et al., editors. Travel Medicine (Second Edition). Edinburgh: Mosby; 2008. p. 211-222.                                                 | Title |
| 429 | Macek K, Macek J. Chapter 20 Drugs. In: Heftmann E, editor. Journal of Chromatography Library. Vol. 51: Elsevier; 1992. p. B393-B445.                                                                                                                             | Title |

|     |                                                                                                                                                                                                                                                                |       |
|-----|----------------------------------------------------------------------------------------------------------------------------------------------------------------------------------------------------------------------------------------------------------------|-------|
| 430 | Subramani PA, Panati K, Lebaka VR, et al. Chapter 21 - Nanostructures for Curcumin Delivery: Possibilities and Challenges. In: Grumezescu AM, editor. Nano- and Microscale Drug Delivery Systems: Elsevier; 2017. p. 393-418.                                  | Title |
| 431 | Pacios-Michelena S, García-García JD, Ramos-González R, et al. Chapter 25 - Nanocarrier-based formulations: Concepts and applications. In: Abd-Elsalam KA, Murugan K, editors. Bio-Based Nanoemulsions for Agri-Food Applications: Elsevier; 2022. p. 413-439. | Title |
| 432 | Midtvedt T. Chapter 25 - Penicillins, cephalosporins, other beta-lactam antibiotics, and tetracyclines. In: Aronson JK, editor. Side Effects of Drugs Annual. Vol. 31: Elsevier; 2009. p. 413-425.                                                             | Title |
| 433 | Toussaint KA, Gallagher JC. Chapter 25 - Penicillins, cephalosporins, other beta-lactam antibiotics, and tetracyclines. In: Aronson JK, editor. Side Effects of Drugs Annual. Vol. 35: Elsevier; 2014. p. 447-461.                                             | Title |
| 434 | Vardanyan R, Hruby V. Chapter 30 - Antibiotics. In: Vardanyan R, Hruby V, editors. Synthesis of Best-Seller Drugs. Boston: Academic Press; 2016. p. 573-643.                                                                                                   | Title |
| 435 | Pelton SI. CHAPTER 31 - Otitis Media. In: Long SS, editor. Principles and Practice of Pediatric Infectious Disease (Third Edition). Edinburgh: W.B. Saunders; 2008. p. 221-230.                                                                                | Title |
| 436 | Strupczewski JD, Ellis DB. Chapter 34. To Market, To Market – 1992. In: Bristol JA, editor. Annual Reports in Medicinal Chemistry. Vol. 28: Academic Press; 1993. p. 325-341.                                                                                  | Title |
| 437 | Crawford SE, Daum RS. Chapter 35 - Bacterial Pneumonia, Lung Abscess, and Empyema. In: Taussig LM, Landau LI, editors. Pediatric Respiratory Medicine (Second Edition). Philadelphia: Mosby; 2008. p. 501-553.                                                 | Title |
| 438 | Mitchell MA. Chapter 36 - Therapeutics. In: Mader DR, editor. Reptile Medicine and Surgery (Second Edition). Saint Louis: W.B. Saunders; 2006. p. 631-664.                                                                                                     | Title |



|     |                                                                                                                                                                                                                                                                                                                                                                                                                                                                |       |
|-----|----------------------------------------------------------------------------------------------------------------------------------------------------------------------------------------------------------------------------------------------------------------------------------------------------------------------------------------------------------------------------------------------------------------------------------------------------------------|-------|
| 439 | Sáez-Llorens X, McCracken GH. Chapter 37 - Clinical Pharmacology of Antibacterial Agents. In: Remington JS, Klein JO, Wilson CB, et al., editors. Infectious Diseases of the Fetus and Newborn Infant (Sixth Edition). Philadelphia: W.B. Saunders; 2006. p. 1223-1267.                                                                                                                                                                                        | Title |
| 440 | Barry B, Muffat-Joly M. Chapter 43 - Gerbil Model of Acute Otitis Media. In: Zak O, Sande MA, editors. Handbook of Animal Models of Infection. London: Academic Press; 1999. p. 375-384.                                                                                                                                                                                                                                                                       | Title |
| 441 | Sharma S, Anthonisen N. Chapter 54 - Antibiotics. In: Barnes PJ, Drazen JM, Rennard S, et al., editors. Asthma and COPD. London: Academic Press; 2002. p. 573-585.                                                                                                                                                                                                                                                                                             | Title |
| 442 | Hay P, Pittrof R. CHAPTER 55 - Infections in pregnancy. In: Finch RG, Greenwood D, Norrby SR, et al., editors. Antibiotic and Chemotherapy (Ninth Edition). London: W.B. Saunders; 2010. p. 702-717.                                                                                                                                                                                                                                                           | Title |
| 443 | Kakar S, Mindel A. CHAPTER 56 - Sexually transmitted diseases. In: Finch RG, Greenwood D, Norrby SR, et al., editors. Antibiotic and Chemotherapy (Ninth Edition). London: W.B. Saunders; 2010. p. 718-742.                                                                                                                                                                                                                                                    | Title |
| 444 | Igietseme JU, Omosun Y, Black CM. Chapter 78 - Bacterial Sexually Transmitted Infections (STIs): A Clinical Overview**Disclaimer: The findings and conclusions in this report are those of the authors and do not necessarily represent the official position of the Centers for Disease Control and Prevention. In: Tang Y-W, Sussman M, Liu D, et al., editors. Molecular Medical Microbiology (Second Edition). Boston: Academic Press; 2015. p. 1403-1420. | Title |
| 445 | Estripeaut D, Sáez-Llorens X. CHAPTER 78 - PERINATAL BACTERIAL DISEASES. In: Feigin RD, Cherry JD, Demmler-Harrison GJ, et al., editors. Feigin and Cherry's Textbook of Pediatric Infectious Diseases (Sixth Edition). Philadelphia: W.B. Saunders; 2009. p. 979-1020.                                                                                                                                                                                        | Title |
| 446 | Matsson P, Giacomini KM, Craig Brater D. Chapter 95 - Renal Disposition of Drugs and Translation to Dosing Strategies. In: Alpern RJ, Moe OW, Caplan M, editors. Seldin and Giebisch's The Kidney (Fifth Edition): Academic Press; 2013. p. 3185-3214.                                                                                                                                                                                                         | Title |

|     |                                                                                                                                                                                                                                                                               |       |
|-----|-------------------------------------------------------------------------------------------------------------------------------------------------------------------------------------------------------------------------------------------------------------------------------|-------|
| 447 | Dagan R, Greenberg D, Jacobs MR, et al. CHAPTER 96 - PNEUMOCOCCAL INFECTIONS. In: Feigin RD, Cherry JD, Demmler-Harrison GJ, et al., editors. Feigin and Cherry's Textbook of Pediatric Infectious Diseases (Sixth Edition). Philadelphia: W.B. Saunders; 2009. p. 1288-1342. | Title |
| 448 | Koh AY, Pizzo PA. CHAPTER 99 - Fever and Granulocytopenia. In: Long SS, editor. Principles and Practice of Pediatric Infectious Disease (Third Edition). Edinburgh: W.B. Saunders; 2008. p. 563-570.                                                                          | Title |
| 449 | Finch RG. Chapter 129 - Principles of anti-infective therapy. In: Cohen J, Opal SM, Powderly WG, editors. Infectious Diseases (Third Edition). London: Mosby; 2010. p. 1275-1287.                                                                                             | Title |
| 450 | Noel GJ, Kendler JS, Hartman BJ, et al. Chapter 134 - $\beta$ -Lactam antibiotics. In: Cohen J, Opal SM, Powderly WG, editors. Infectious Diseases (Third Edition). London: Mosby; 2010. p. 1340-1354.                                                                        | Title |
| 451 | Shaw SP. Chapter 195 - Penicillins and Cephalosporins. In: Silverstein DC, Hopper K, editors. Small Animal Critical Care Medicine. Saint Louis: W.B. Saunders; 2009. p. 828-829.                                                                                              | Title |
| 452 | Michelow IC, McCracken GH. CHAPTER 248 - ANTIBACTERIAL THERAPEUTIC AGENTS. In: Feigin RD, Cherry JD, Demmler-Harrison GJ, et al., editors. Feigin and Cherry's Textbook of Pediatric Infectious Diseases (Sixth Edition). Philadelphia: W.B. Saunders; 2009. p. 3178-3227.    | Title |
| 453 | Raszka WV. Chapter 284 - Antimicrobials. In: Osborn LM, DeWitt TG, First LR, et al., editors. Pediatrics. Philadelphia: Mosby; 2005. p. 1808-1828.                                                                                                                            | Title |
| 454 | Christenson JC, Korgenski EK. CHAPTER 286 - Laboratory Diagnosis of Infection Due to Bacteria, Fungi, Parasites, and Rickettsiae. In: Long SS, editor. Principles and Practice of Pediatric Infectious Disease (Third Edition). Edinburgh: W.B. Saunders; 2008. p. 1341-1352. | Title |
| 455 | Neely MN, Reed MD. CHAPTER 291 - Pharmacokinetic–Pharmacodynamic Basis of Optimal Antibiotic Therapy. In: Long SS, editor. Principles and Practice of Pediatric Infectious Disease (Third Edition). Edinburgh: W.B. Saunders; 2008. p. 1404-1420.                             | Title |

|     |                                                                                                                                                                                                                                                                  |        |
|-----|------------------------------------------------------------------------------------------------------------------------------------------------------------------------------------------------------------------------------------------------------------------|--------|
| 456 | Bradley JS, Sauberan J. CHAPTER 292 - Antimicrobial Agents. In: Long SS, editor. Principles and Practice of Pediatric Infectious Disease (Third Edition). Edinburgh: W.B. Saunders; 2008. p. 1420-1452.                                                          | Title  |
| 457 | Darwish IA, Darwish HW, Bakheit AH, et al. Chapter Five - Irbesartan (a comprehensive profile). In: Al-Majed AA, editor. Profiles of Drug Substances, Excipients and Related Methodology. Vol. 46: Academic Press; 2021. p. 185-272.                             | Title  |
| 458 | Mostafa GAE, Al-Otaibi YH, Al-Badr AA. Chapter One - Cefpodoxime proxetil. Profiles of Drug Substances, Excipients and Related Methodology. Vol. 44: Academic Press; 2019. p. 1-165.                                                                             | Title  |
| 459 | Al Omari MMH, Jaafari DS, Al-Sou'od KA, et al. Chapter Seven - Moxifloxacin Hydrochloride. In: Brittain HG, editor. Profiles of Drug Substances, Excipients and Related Methodology. Vol. 39: Academic Press; 2014. p. 299-431.                                  | Title  |
| 460 | Kuriyama T, Karasawa T, Williams DW. Chapter Thirteen - Antimicrobial Chemotherapy: Significance to Healthcare. In: Percival SL, Williams DW, Randle J, et al., editors. Biofilms in Infection Prevention and Control. Boston: Academic Press; 2014. p. 209-244. | Title  |
| 461 | Al-Badr AA, Alasseiri FA. Chapter Two - Cefdinir. In: Brittain HG, editor. Profiles of Drug Substances, Excipients and Related Methodology. Vol. 39: Academic Press; 2014. p. 41-112.                                                                            | Title  |
| 462 | Poschet JF, HammondPeter D, Fairclough SM. Characterisation of penicillin-G uptake in rabbit small-intestinal brush-border membrane vesicles. Biochimica et Biophysica Acta (BBA) - Biomembranes. 1996 1996/01/31;1278(2):233-240.                               | Animal |
| 463 | Benkhelifa S, Decroix M-O, Arnaud P, et al. Characteristics of Cephalexin transport across isolated rabbit ileum. International journal of pharmaceutics. 1997;159(1):115-125.                                                                                   | Animal |
| 464 | Mura P, Valleri M, Baldanzi S, et al. Characterization and evaluation of the performance of different calcium and magnesium salts as excipients for direct compression. Int J Pharm. 2019 Aug 15;567:118454.                                                     | Title  |

|     |                                                                                                                                                                                                                                                    |          |
|-----|----------------------------------------------------------------------------------------------------------------------------------------------------------------------------------------------------------------------------------------------------|----------|
| 465 | Maestrelli F, Jug M, Cirri M, et al. Characterization and microbiological evaluation of chitosan-alginate microspheres for cefixime vaginal administration. <i>Carbohydrate polymers</i> . 2018;192:176-183.                                       | Abstract |
| 466 | Nagai J, Taogoshi T, Tokunaga A, et al. Characterization of Prostaglandin E1 Transport in Rat Renal Brush-border Membrane. <i>Drug Metabolism and Pharmacokinetics</i> . 2006 2006/01/01/;21(3):186-193.                                           | Animal   |
| 467 | Epling D. Characterization of the Intestinal Permeability and Oral Absorption of Valacyclovir in Wildtype and huPepT1 Transgenic Mice 2019.                                                                                                        | Animal   |
| 468 | Friedman DI, Amidon GL. Characterization of the intestinal transport parameters for small peptide drugs. <i>Journal of Controlled Release</i> . 1990 1990/08/01/;13(2):141-146.                                                                    | Title    |
| 469 | Oh DM, Sinko PJ, Amidon GL. Characterization of the oral absorption of some beta-lactams: effect of the alpha-amino side chain group. <i>J Pharm Sci</i> . 1993 Sep;82(9):897-900.                                                                 | Title    |
| 470 | Goldstein FW. Choice of an oral beta-lactam antibiotic for infections due to penicillin-resistant <i>Streptococcus pneumoniae</i> . <i>Scand J Infect Dis</i> . 1997;29(3):255-7.                                                                  | Title    |
| 471 | Nicolau DP, Quintiliani R. Choosing between the New Cephalosporin Antibiotics. <i>Pharmacoeconomics</i> . 1994;5(2):34-39.                                                                                                                         | Abstract |
| 472 | Marzo A, Dal Bo L. Chromatography as an analytical tool for selected antibiotic classes: a reappraisal addressed to pharmacokinetic applications. <i>Journal of Chromatography A</i> . 1998;812(1-2):17-34.                                        | Title    |
| 473 | Berlioz F, Lepere-Prevot B, Julien S, et al. Chronic nifedipine dosing enhances cephalexin bioavailability and intestinal absorption in conscious rats. <i>Drug metabolism and disposition</i> . 2000;28(11):1267-1269.                            | Animal   |
| 474 | LeBel M. Ciprofloxacin: chemistry, mechanism of action, resistance, antimicrobial spectrum, pharmacokinetics, clinical trials, and adverse reactions. <i>Pharmacotherapy: The Journal of Human Pharmacology and Drug Therapy</i> . 1988;8(1):3-30. | Title    |

|     |                                                                                                                                                                                                                                                                                                                                                  |          |
|-----|--------------------------------------------------------------------------------------------------------------------------------------------------------------------------------------------------------------------------------------------------------------------------------------------------------------------------------------------------|----------|
| 475 | Hardy DJ, Guay DR, Jones RN. Clarithromycin, a unique macrolide: a pharmacokinetic, microbiological, and clinical overview. <i>Diagnostic microbiology and infectious disease</i> . 1992;15(1):39-53.                                                                                                                                            | Title    |
| 476 | Birgy A, Madhi F, Jung C, et al. Clavulanate combinations with mecillinam, cefixime or cefpodoxime against ESBL-producing Enterobacterales frequently associated with bla OXA-1 in a paediatric population with febrile urinary tract infections. <i>Journal of Antimicrobial Chemotherapy</i> . 2021;76(11):2839-2846.                          | Abstract |
| 477 | Saudagar PS, Survase SA, Singhal RS. Clavulanic acid: A review. <i>Biotechnology Advances</i> . 2008 2008/07/01;26(4):335-351.                                                                                                                                                                                                                   | Title    |
| 478 | Chambers ST, Murdoch DR, Pearce MJ. Clinical and economic considerations in the use of third-generation oral cephalosporins. <i>PharmacoEconomics</i> . 1995;7(5):416-427.                                                                                                                                                                       | Abstract |
| 479 | Edlund C, Ternhag A, Skoog Ståhlgren G, et al. The clinical and microbiological efficacy of temocillin versus cefotaxime in adults with febrile urinary tract infection, and its effects on the intestinal microbiota: a randomised multicentre clinical trial in Sweden. <i>The Lancet Infectious Diseases</i> . 2022 2022/03/01;22(3):390-400. | Title    |
| 480 | Canafax DM, Giebink GS. Clinical and pharmacokinetic basis for the antimicrobial treatment of acute otitis media. <i>Otolaryngologic Clinics of North America</i> . 1991;24(4):859-875.                                                                                                                                                          | Title    |
| 481 | Saito A. Clinical Breakpoints for Antimicrobial Agents in Pulmonary Infections and Sepsis: Report of The Committee for Japanese Standards for Antimicrobial Susceptibility Testing for Bacteria. <i>Journal of Infection and Chemotherapy</i> . 1995 1995/01/01;1(1):83-88.                                                                      | Title    |
| 482 | Gehanno P, Boucot I, Berche P, et al. Clinical efficacy and tolerability of cefixime in the treatment of acute sinusitis. <i>Drugs</i> . 1991;42(4):19-24.                                                                                                                                                                                       | Abstract |
| 483 | Cohen R. Clinical efficacy of cefpodoxime in respiratory tract infection. <i>Journal of Antimicrobial Chemotherapy</i> . 2002;50(suppl_1):23-27.                                                                                                                                                                                                 | Title    |

|     |                                                                                                                                                                                        |          |
|-----|----------------------------------------------------------------------------------------------------------------------------------------------------------------------------------------|----------|
| 484 | Meguro H, Arimasu O, Sohda H, et al. Clinical evaluation of cefixime in children. The Japanese Journal of Antibiotics. 1986;39(4):1007-1019.                                           | Abstract |
| 485 | Aihara R, Kobashi H, Nishioka A, et al. Clinical experience with cefixime in the pediatric field. The Japanese Journal of Antibiotics. 1986;39(4):1138-1148.                           | Abstract |
| 486 | Furukawa S, Okada T. Clinical experience with cefixime in the pediatric infections. The Japanese Journal of Antibiotics. 1986;39(4):1128-1137.                                         | Abstract |
| 487 | Cohen R. Clinical experience with cefpodoxime proxetil in acute otitis media. The Pediatric Infectious Disease Journal. 1995;14(4 Suppl):S12-8.                                        | Title    |
| 488 | Young LS. Clinical infections. Antimicrobial Newsletter. 1985 1985/08/01;2(8):57-59.                                                                                                   | Title    |
| 489 | Kadhiravan T, Wig N, Kapil A, et al. Clinical outcomes in typhoid fever: adverse impact of infection with nalidixic acid-resistant Salmonella typhi. BMC Infect Dis. 2005 May 18;5:37. | Title    |
| 490 | Garau J. Clinical perspectives on the management of community-acquired pneumonia. Diagnostic Microbiology and Infectious Disease. 1996 1996/08/01;25(4):205-211.                       | Title    |
| 491 | Shiu J, Ting G, Kiang TK. Clinical pharmacokinetics and pharmacodynamics of delafloxacin. European Journal of Drug Metabolism and Pharmacokinetics. 2019;44(3):305-317.                | Title    |
| 492 | Reed MD. Clinical pharmacokinetics of amoxicillin and clavulanate. The Pediatric infectious disease journal. 1996;15(10):949-954.                                                      | Title    |
| 493 | Meyers BR, Wilkinson P. Clinical pharmacokinetics of antibacterial drugs in the elderly. Clinical pharmacokinetics. 1989;17(6):385-395.                                                | Title    |
| 494 | Westphal J-F, Brogard J-M. Clinical pharmacokinetics of newer antibacterial agents in liver disease. Clinical pharmacokinetics. 1993;24(1):46-58.                                      | Title    |

|     |                                                                                                                                                                                                                                                                                                               |          |
|-----|---------------------------------------------------------------------------------------------------------------------------------------------------------------------------------------------------------------------------------------------------------------------------------------------------------------|----------|
| 495 | Klepser ME, Marangos MN, Patel KB, et al. Clinical pharmacokinetics of newer cephalosporins. <i>Clinical pharmacokinetics</i> . 1995;28(5):361-384.                                                                                                                                                           | Abstract |
| 496 | Stoeckel K, Hayton WL, Edwards DJ. Clinical pharmacokinetics of oral cephalosporins. <i>Oral Cephalosporins</i> . 1995;47:34-71.                                                                                                                                                                              | Abstract |
| 497 | Lavy E, Ziv G, Aroch I, et al. Clinical pharmacologic aspects of cefixime in dogs. <i>Am J Vet Res</i> . 1995 May;56(5):633-8.                                                                                                                                                                                | Animal   |
| 498 | Ziv G, Lavy E, Glickman A, et al. Clinical pharmacology of cefixime in unweaned calves. <i>Journal of Veterinary Pharmacology and Therapeutics</i> . 1995;18(2):94-100.                                                                                                                                       | Animal   |
| 499 | Nakazawa S, Sato H, Narita A, et al. Clinical studies of cefixime granules in pediatrics. <i>The Japanese Journal of Antibiotics</i> . 1986;39(4):1020-1034.                                                                                                                                                  | Abstract |
| 500 | Nishimura T, Takashima T, Tabuki K, et al. Clinical studies of cefixime in pediatric field. <i>The Japanese Journal of Antibiotics</i> . 1986;39(4):1115-1127.                                                                                                                                                | Abstract |
| 501 | Hosoda T, Masuda M, Miyao M, et al. Clinical studies on cefixime in pediatrics. <i>The Japanese Journal of Antibiotics</i> . 1986;39(4):1149-1156.                                                                                                                                                            | Abstract |
| 502 | ChiCtr. Clinical study for pharmacokinetics and coefficient of variation of cefixime granules [Trial registry record; Clinical trial protocol]. <a href="http://www.who.int/trialsearch/Trial2.aspx?TrialID=ChiCTR2000032945">http://www.who.int/trialsearch/Trial2.aspx?TrialID=ChiCTR2000032945</a> . 2020. | Abstract |
| 503 | Haruta T, Kuroki S, Kobayashi Y. Clinical study on cefixime granules in the field of pediatrics. <i>The Japanese Journal of Antibiotics</i> . 1986;39(4):1106-1114.                                                                                                                                           | Abstract |
| 504 | Chiu C, Lin T, Ou J. A clinical trial comparing oral azithromycin, cefixime and no antibiotics in the treatment of acute uncomplicated <i>Salmonella enteritis</i> in children. <i>Journal of paediatrics and child health</i> . 1999;35(4):372-374.                                                          | Abstract |

|     |                                                                                                                                                                                                                                                                                                              |          |
|-----|--------------------------------------------------------------------------------------------------------------------------------------------------------------------------------------------------------------------------------------------------------------------------------------------------------------|----------|
| 505 | Mehta SN, Stafylis C, Tellalian DM, et al. Clinical trial protocol to evaluate the efficacy of cefixime in the treatment of early syphilis. <i>Trials</i> . 2020;21(1):1-9.                                                                                                                                  | Abstract |
| 506 | Ogawa R, Echizen H. Clinically significant drug interactions with antacids. <i>Drugs</i> . 2011;71(14):1839-1864.                                                                                                                                                                                            | Title    |
| 507 | Dhahir S, Mohammed N, editors. Cloud point extraction of Cefixime drug by direct (UV-Vis) spectrophotometer and indirect (Flame Atomic Absorption) technique. <i>Journal of Physics: Conference Series</i> ; 2019: IOP Publishing.                                                                           | Abstract |
| 508 | Jacobs MR. Combating resistance: application of the emerging science of pharmacokinetics and pharmacodynamics. <i>International journal of antimicrobial agents</i> . 2007;30:122-126.                                                                                                                       | Title    |
| 509 | Yu M, Gu X, Qu Y, et al. Combination Therapy with TCM Preparation Kumu Injection and Azithromycin against Bacterial Infection and Inflammation: In Vitro and In Vivo. <i>Evidence-Based Complementary and Alternative Medicine</i> . 2022;2022.                                                              | Title    |
| 510 | Jones RN, Johnson DM. Combinations of orally administered beta-lactams to maximize spectrum and activity against drug-resistant respiratory tract pathogens: I. Synergy studies of amoxicillin and cefixime with <i>Streptococcus pneumoniae</i> . <i>Diagn Microbiol Infect Dis</i> . 1998 Jun;31(2):373-6. | Title    |
| 511 | Madhi F, Biscardi S, Bingen E, et al. Combined Relay Therapy With Oral Cefixime and Clavulanate for Febrile Urinary Tract Infection Caused by Extended-Spectrum $\beta$ -lactamase-producing <i>Escherichia coli</i> . <i>The Pediatric infectious disease journal</i> . 2013;32(1):96-97.                   | Abstract |
| 512 | Zhu L, Wang H. Commentary on "Beta-Lactam Antibiotics as A Possible Novel Therapy for Managing Epilepsy and Autism, A Case Report and Review of Literature". <i>Iranian Journal of Child Neurology</i> . 2018;12(3):139-140.                                                                                 | Title    |



|     |                                                                                                                                                                                                                                                                                                                |          |
|-----|----------------------------------------------------------------------------------------------------------------------------------------------------------------------------------------------------------------------------------------------------------------------------------------------------------------|----------|
| 513 | Hernández Marco R, Guillén Olmos E, Bretón-Martínez JR, et al. Community-acquired febrile urinary tract infection caused by extended-spectrum beta-lactamase-producing bacteria in hospitalised infants. <i>Enfermedades infecciosas y microbiología clinica</i> (English ed). 2017 2017/05/01/;35(5):287-292. | Title    |
| 514 | Granton JT, Grossman RF. COMMUNITY-ACQUIRED PNEUMONIA IN THE ELDERLY PATIENT: Clinical Features, Epidemiology, and Treatment. <i>Clinics in Chest Medicine</i> . 1993 1993/09/01/;14(3):537-553.                                                                                                               | Title    |
| 515 | Nies B. Comparative activity of cefixime and cefaclor in an in vitro model simulating human pharmacokinetics. <i>European Journal of Clinical Microbiology and Infectious Diseases</i> . 1989;8(6):558-561.                                                                                                    | Abstract |
| 516 | Goldstein F, Kitzis MD, Gutmann L, et al. Comparative activity of oral cephalosporins against $\beta$ -lactamase producing pathogens. <i>Médecine et Maladies Infectieuses</i> . 1992 1992/06/01/;22:535-543.                                                                                                  | Abstract |
| 517 | Goonetilleke A, Dev D, Aziz I, et al. A comparative analysis of pharmacokinetics of ceftriaxone in serum and pleural fluid in humans: a study of once daily administration by intramuscular and intravenous routes. <i>Journal of Antimicrobial Chemotherapy</i> . 1996;38(6):969-976.                         | Title    |
| 518 | Verbist L, Jacobs J, Hens K. Comparative antimicrobial activity of ceftibuten against multiply-resistant microorganisms from Belgium. <i>Diagnostic microbiology and infectious disease</i> . 1991;14(1):53-61.                                                                                                | Title    |
| 519 | Bauernfeind A. Comparative antimicrobial spectrum and activity of ceftibuten against clinical isolates from West Germany. <i>Diagnostic microbiology and infectious disease</i> . 1991;14(1):63-74.                                                                                                            | Title    |
| 520 | Ige OM, Okesola AO. COMPARATIVE EFFICACY AND SAFETY OF CEFIXIME AND CIPROFLOXACIN IN THE MANAGEMENT OF ADULTS WITH COMMUNITY-ACQUIRED PNEUMONIA IN IBADAN, NIGERIA. <i>Ann Ib Postgrad Med</i> . 2015 Dec;13(2):72-8.                                                                                          | Abstract |
| 521 | Sengupta J, Mondai A, Jain P, et al. Comparative evaluation of cefpodoxime versus cefixime in children with lower respiratory tract infections. <i>The Indian Journal of Pediatrics</i> . 2004;71(6):517-521.                                                                                                  | Abstract |

|     |                                                                                                                                                                                                                                                                                                                |          |
|-----|----------------------------------------------------------------------------------------------------------------------------------------------------------------------------------------------------------------------------------------------------------------------------------------------------------------|----------|
| 522 | Cazzola M, Vinciguerra A, Beghi G, et al. Comparative evaluation of the clinical and microbiological efficacy of co-amoxiclav vs cefixime or ciprofloxacin in bacterial exacerbation of chronic bronchitis. Journal of chemotherapy. 1995;7(5):432-441.                                                        | Abstract |
| 523 | Koeth LM, Jacobs MR, Good CE, et al. Comparative in vitro activity of a pharmacokinetically enhanced oral formulation of amoxicillin/clavulanic acid (2000/125 mg twice daily) against 9172 respiratory isolates collected worldwide in 2000. International journal of infectious diseases. 2004;8(6):362-373. | Title    |
| 524 | Hamilton-Miller J, Brumfitt W. Comparative in vitro activity of cefixime, cefaclor and loracarbef against urinary pathogens. Drugs under experimental and clinical research. 1991;17(10-11):517-519.                                                                                                           | Abstract |
| 525 | Mortensen JE, Egleton JH. Comparative in vitro activity of fuopenem against aerobic bacteria isolated from pediatric patients. Diagnostic Microbiology and Infectious Disease. 1995 1995/07/01;22(3):301-306.                                                                                                  | Title    |
| 526 | Arshad HM, Mohiuddin OA, Azmi MB. Comparative in vitro antibacterial analysis of different brands of cefixime against clinical isolates of Staphylococcus aureus and Escherichia coli. Journal of Applied Pharmaceutical Science. 2012 (Issue):109-113.                                                        | Abstract |
| 527 | Danafar H. Comparative in vitro assessment of tolterodine tartrate tablets by high performance liquid chromatographic (HPLC). Pharmaceutical and Biomedical Research. 2016;2(2):47-57.                                                                                                                         | Title    |
| 528 | Hassouna ME, Mohamed MA. Comparative in-vitro dissolution studies for determination of cefixime in an innovator product of suprax powder for oral suspension dosage form using RP-HPLC method. Glob J Oto. 2018;14(3):555886.                                                                                  | Abstract |
| 529 | Wise R. Comparative microbiological activity and pharmacokinetics of cefprozil. European Journal of Clinical Microbiology and Infectious Diseases. 1994;13(10):839-845.                                                                                                                                        | Title    |
| 530 | SITAR D, HOBAN D, AOKI F, editors. COMPARATIVE PHARMACOKINETIC DISPOSITION OF CEFIXIME AND CEFUROXIME IN HEALTHY-YOUNG VOLUNTEERS AT STEADY-STATE.                                                                                                                                                             | Abstract |

|     |                                                                                                                                                                                                                                                                                                                                                                                                                          |          |
|-----|--------------------------------------------------------------------------------------------------------------------------------------------------------------------------------------------------------------------------------------------------------------------------------------------------------------------------------------------------------------------------------------------------------------------------|----------|
|     | CLINICAL PHARMACOLOGY & THERAPEUTICS; 1993: MOSBY-YEAR BOOK INC 11830<br>WESTLINE INDUSTRIAL DR, ST LOUIS, MO 63146-3318.                                                                                                                                                                                                                                                                                                |          |
| 531 | Deppermann KM, Garbe C, Hasse K, et al. Comparative pharmacokinetics of cefotiam hexetil (CEHX), cefuroxime axetil (CEFUR), Cefixime (CEFIX), Cephalexine (CEPHA), and the influence of a standard breakfast, ranitidine, and Maalox 70 on enteral absorption of cefotiam hexetil. <i>Klinische Wochenschrift</i> . 1990;68(Suppl 19):48-49.                                                                             | Abstract |
| 532 | Naz U, Ashraf MM, Javed I, et al. Comparative pharmacokinetics of cefspan and ceforal-3 in adult human healthy female subjects. <i>Lat Am J Pharm</i> . 2017;36(4):776-782.                                                                                                                                                                                                                                              | Title    |
| 533 | Deppermann G, Hasse K, Borner K, et al., editors. Comparative pharmacokinetics of ceftotiam hexetil, cefuroxim, cefixime, cephalixin and the effect of H2 blockers, standard breakfast and antacid on the bioavailability of ceftotiam hexetil, abstr. 1223. Program and abstract of the 29th Interscience Conference on Antimicrobial Agents and Chemotherapy. American Society for Microbiology, Washington, DC; 1989. | Abstract |
| 534 | Nix D, Symonds W, Wilton J, et al., editors. COMPARATIVE PHARMACOKINETICS OF ORAL CEFTIBUTEN, CEFIXIME, CEFACLOR, AND CEFUROXIME AXETIL IN NORMAL ADULTS. CLINICAL PHARMACOLOGY & THERAPEUTICS; 1994: MOSBY-YEAR BOOK INC 11830<br>WESTLINE INDUSTRIAL DR, ST LOUIS, MO 63146-3318.                                                                                                                                      | Abstract |
| 535 | Lode H, Fassbender M, Schaberg T, et al. Comparative pharmacokinetics of the new oral cephalosporins. <i>Drugs</i> . 1994;47(3):10-20.                                                                                                                                                                                                                                                                                   | Abstract |
| 536 | Notario G, Siepman N, Devcich K, et al. Comparative safety and efficacy of clarithromycin and three oral cephalosporins in the treatment of outpatients with bacterial bronchitis. <i>Current Therapeutic Research</i> . 1993<br>1993/12/01/;54(6):628-640.                                                                                                                                                              | Abstract |

|     |                                                                                                                                                                                                                                                                                           |          |
|-----|-------------------------------------------------------------------------------------------------------------------------------------------------------------------------------------------------------------------------------------------------------------------------------------------|----------|
| 537 | McCarty JM, Siepman N, Craft JC. Comparative safety and efficacy of clarithromycin versus amoxicillin/clavulanate in the treatment of acute otitis media in pediatric patients. <i>Current Therapeutic Research</i> . 1994 1994/09/01/;55(9):1016-1026.                                   | Title    |
| 538 | Mishra C, Jha AK, Ahmad MP, et al. A comparative study between cefixime and ofloxacin in the treatment of uncomplicated typhoid fever attending a tertiary care teaching hospital. <i>Journal of National Medical College</i> . 2017;2(1):3-7.                                            | Abstract |
| 539 | Cao XT, Kneen R, Nguyen TA, et al. A comparative study of ofloxacin and cefixime for treatment of typhoid fever in children. The Dong Nai Pediatric Center Typhoid Study Group. <i>Pediatr Infect Dis J</i> . 1999 Mar;18(3):245-8.                                                       | Abstract |
| 540 | Pipitpanpipit T, Sntanirand P, Kongchareonsombat K. A Comparative Study of Oral Medication to Prevent Transient Bacteriemia and Adverse Events From Transrectal Prostatic Biopsy: Ciprofloxacin Versus Cefixime. <i>J Med Assoc Thailand</i> . 2017;100:528.                              | Title    |
| 541 | Reinert R, Lütticken R, Lemperle M, et al. A comparative study of the in-vitro activity of levofloxacin against <i>Streptococcus pneumoniae</i> . <i>Journal of Antimicrobial Chemotherapy</i> . 1999;43(suppl_3):5-8.                                                                    | Title    |
| 542 | Jieying H, Min H, Xianglan Z. comparative study on pharmacokinetics in volunteers of domestic and imported cefixime in 3 dosage forms. <i>Chin New Drugs J</i> . 1996;6:48-53.                                                                                                            | Abstract |
| 543 | Arguedas A, Loaiza C, Herrera M, et al. Comparative trial of 3-day azithromycin versus 10-day amoxicillin/clavulanate potassium in the treatment of children with acute otitis media with effusion. <i>International Journal of Antimicrobial Agents</i> . 1996 1996/04/01/;6(4):233-238. | Title    |
| 544 | Kiani R, Johnson D, Nelson B. Comparative, multicenter studies of cefixime and amoxicillin in the treatment of respiratory tract infections. <i>The American journal of medicine</i> . 1988;85(3):6-13.                                                                                   | Abstract |

|     |                                                                                                                                                                                                                                                                                                                  |          |
|-----|------------------------------------------------------------------------------------------------------------------------------------------------------------------------------------------------------------------------------------------------------------------------------------------------------------------|----------|
| 545 | Singh K, Mohan M, Nautiyal S. Comparing Cefixime, Cefpodoxime and Ofloxacin as Anti-Microbial Agents and their Effects on Gut Microbiota. <i>Int J Sci Res Sci Technol.</i> 2020;7:131-152.                                                                                                                      | Abstract |
| 546 | Levenstein J, * Summerfield, PJF, Fourie, S., Brink, G.,* Michaelides, B.,* Murray, E.*, Naidoo N. Comparison of cefixime and co-trimoxazole in acute uncomplicated urinary tract infection-a double-blind general practice study. <i>South African medical journal.</i> 1986;70(4):455-460.                     | Abstract |
| 547 | Asmar BI, Dajani AS, Del Beccaro MA, et al. Comparison of cefpodoxime proxetil and cefixime in the treatment of acute otitis media in infants and children. <i>Pediatrics.</i> 1994;94(6):847-852.                                                                                                               | Abstract |
| 548 | Stutman HR, Arguedas AG. Comparison of cefprozil with other antibiotic regimens in the treatment of children with acute otitis media. <i>Clinical infectious diseases.</i> 1992;14(Supplement_2):S204-S208.                                                                                                      | Title    |
| 549 | Schatz BS, Karavokiros KT, Taeubel MA, et al. Comparison of cefprozil, cefpodoxime proxetil, loracarbef, cefixime, and ceftibuten. <i>Annals of Pharmacotherapy.</i> 1996;30(3):258-268.                                                                                                                         | Abstract |
| 550 | Orozco H, Sifuentes-Osornio J, Chan C, et al. Comparison of ceftibuten vs. amoxicillin/clavulanic acid as antibiotic prophylaxis in cholecystectomy and/or biliary tract surgery. <i>Journal of Gastrointestinal Surgery.</i> 2000 2000/11/01;4(6):606-610.                                                      | Title    |
| 551 | Eldin AB, Ismaeil O, Hassan W, et al. Comparison of FT-NIR and HPLC for green approach to assay cefixime in its pharmaceutical capsules. <i>Eurasian Journal of Analytical Chemistry.</i> 2016;11(2):79-88.                                                                                                      | Abstract |
| 552 | Boisson M, Jacobs M, Grégoire N, et al. Comparison of intrapulmonary and systemic pharmacokinetics of colistin methanesulfonate (CMS) and colistin after aerosol delivery and intravenous administration of CMS in critically ill patients. <i>Antimicrobial agents and chemotherapy.</i> 2014;58(12):7331-7339. | Title    |
| 553 | Salvarezza C, Mingrone H, Fachinelli H, et al. Comparison of roxithromycin with cefixime in the treatment of adults with community-acquired pneumonia. <i>The Journal of antimicrobial chemotherapy.</i> 1998;41(suppl_2):75-80.                                                                                 | Abstract |

|     |                                                                                                                                                                                                                                                     |          |
|-----|-----------------------------------------------------------------------------------------------------------------------------------------------------------------------------------------------------------------------------------------------------|----------|
| 554 | Handsfield HH, McCormack WM, Hook EW, 3rd, et al. A comparison of single-dose cefixime with ceftriaxone as treatment for uncomplicated gonorrhea. The Gonorrhea Treatment Study Group. N Engl J Med. 1991 Nov 7;325(19):1337-41.                    | Abstract |
| 555 | Hook 3rd E, McCormack WM, Martin D, et al. Comparison of single-dose oral grepafloxacin with cefixime for treatment of uncomplicated gonorrhea in men. The STD Study Group. Antimicrobial agents and chemotherapy. 1997;41(8):1843-1845.            | Abstract |
| 556 | Eddy EP, Wood C, Miller J, et al. A comparison of the affinities of dipeptides and antibiotics for the di-/tripeptide transporter in Caco-2 cells. International Journal of Pharmaceutics. 1995 1995/02/28;115(1):79-86.                            | Title    |
| 557 | Cuzzolin L, Benoni G, Deganello A, et al. Comparison of the effects of cefuroxime axetil and cefaclor on the fecal flora in pediatric patients. Current Therapeutic Research. 1992 1992/10/01;52(4):562-570.                                        | Title    |
| 558 | Zhang F, Xue J, Shao J, et al. Compilation of 222 drugs' plasma protein binding data and guidance for study designs. Drug Discovery Today. 2012 2012/05/01;17(9):475-485.                                                                           | Title    |
| 559 | Esposito S, Canevini MP, Principi N. Complications associated with antibiotic administration: neurological adverse events and interference with antiepileptic drugs. International Journal of Antimicrobial Agents. 2017 2017/07/01;50(1):1-8.      | Title    |
| 560 | Compound index volumes 551–600. Journal of Chromatography A. 1993 1993/04/02;601(1):233-409.                                                                                                                                                        | Title    |
| 561 | Kiang TK, Häfeli UO, Ensom MH. A comprehensive review on the pharmacokinetics of antibiotics in interstitial fluid spaces in humans: implications on dosing and clinical pharmacokinetic monitoring. Clinical pharmacokinetics. 2014;53(8):695-730. | Title    |
| 562 | Khandelwal A, Bahadduri PM, Chang C, et al. Computational models to assign biopharmaceutics drug disposition classification from molecular structure. Pharmaceutical research. 2007;24(12):2249-2262.                                               | Title    |

|     |                                                                                                                                                                                                                                                                       |          |
|-----|-----------------------------------------------------------------------------------------------------------------------------------------------------------------------------------------------------------------------------------------------------------------------|----------|
| 563 | Moorthi K, Fleckenstein G, Nies B. Concentration of cefixime in bile, gallbladder wall and serum after preoperative administration in patients undergoing cholecystectomy. <i>Methods Find Exp Clin Pharmacol.</i> 1990 May;12(4):287-90.                             | Abstract |
| 564 | Martin C, Cottin A, François-Godfroy N, et al. Concentrations de ceftriaxone (1 000 mg IV) dans les tissus abdominaux après emploi en antibioprofylaxie au cours de la chirurgie pancréatique. <i>Médecine et Maladies Infectieuses.</i> 1997 1997/06/01/;27:674-677. | Title    |
| 565 | Pramanik S, Sali V. Connecting the dots in drug delivery: A tour d'horizon of chitosan-based nanocarriers system. <i>International Journal of Biological Macromolecules.</i> 2021 2021/02/01/;169:103-121.                                                            | Title    |
| 566 | Monsees EA, Burns AN, Lee BR, et al. Considerations for implementation: Pediatric outpatient antimicrobial stewardship program. <i>American Journal of Infection Control.</i> 2021 2021/12/01/;49(12):1543-1546.                                                      | Title    |
| 567 | Yuk-Choi JH, Nightingale CH, Williams TW. Considerations in dosage selection for third generation cephalosporins. <i>Clinical pharmacokinetics.</i> 1992;22(2):132-143.                                                                                               | Abstract |
| 568 | Contents. <i>International Journal of Antimicrobial Agents.</i> 1994 1994/01/01/;3(4):285-287.                                                                                                                                                                        | Title    |
| 569 | Contents of volume 46 and author index. <i>Biochemical Pharmacology.</i> 1993 1993/01/01/;46:v-xxxvi.                                                                                                                                                                 | Title    |
| 570 | Bergan T, Michalsen H, Malmborg AS, et al. Contents, Vol. 39, 1993. <i>Chemotherapy.</i> 1993;39(6):I-VI.                                                                                                                                                             | Title    |
| 571 | Liu Y, Wu K, Wang J, et al. Continuous production of antioxidant liposome for synergistic cancer treatment using high-gravity rotating packed bed. <i>Chemical Engineering Journal.</i> 2018 2018/02/15/;334:1766-1774.                                               | Title    |
| 572 | Westphal F. Contributions de la pharmacocinetique clinique a l'exploration des mecanismes cellulaires regulant l'absorption intestinale des batelactamines: applications a l'amoxicilline et au cefixime: Strasbourg 1; 1993.                                         | Title    |

|     |                                                                                                                                                                                                                                       |                |
|-----|---------------------------------------------------------------------------------------------------------------------------------------------------------------------------------------------------------------------------------------|----------------|
| 573 | Van Hout MC. The controversies, challenges and complexities of Lyme disease: implications for medical education, clinical practice and research. <i>Journal of Pharmacy and Pharmaceutical Sciences</i> . 2018;21(1):429-436.         | Title          |
| 574 | Attimarad MV, Alnajjar AO. A conventional HPLC-MS method for the simultaneous determination of ofloxacin and cefixime in plasma: Development and validation. <i>Journal of Basic and Clinical Pharmacy</i> . 2013;4(2):36.            | Abstract       |
| 575 | Frimodt-Møller N. Correlation between pharmacokinetic/pharmacodynamic parameters and efficacy for antibiotics in the treatment of urinary tract infection. <i>International journal of antimicrobial agents</i> . 2002;19(6):546-553. | Title          |
| 576 | Jewesson P. Cost-effectiveness and value of an IV switch. <i>Pharmacoeconomics</i> . 1994;5(2):20-26.                                                                                                                                 | Title          |
| 577 | Ranjan Sahoo C, Sahoo J, Mahapatra M, et al. Coumarin derivatives as promising antibacterial agent(s). <i>Arabian Journal of Chemistry</i> . 2021 2021/02/01;14(2):102922.                                                            | Title          |
| 578 | Zhang L, Xu Z. Coumarin-containing hybrids and their anticancer activities. <i>European Journal of Medicinal Chemistry</i> . 2019 2019/11/01;181:111587.                                                                              | Title          |
| 579 | Jones RN. Critical assessment of the newer non-quinolone oral antimicrobial agents. <i>Antimicrobial Newsletter</i> . 1989;6(7):53-60.                                                                                                | Title          |
| 580 | Cluzel R. [Critical concentrations of cefixime and disc potency]. <i>Presse Med</i> . 1989 Oct 11;18(32):1567-8.                                                                                                                      | Not Accessible |
| 581 | Zagursky RJ, Pichichero ME. Cross-reactivity in $\beta$ -Lactam Allergy. <i>The Journal of Allergy and Clinical Immunology: In Practice</i> . 2018 2018/01/01;6(1):72-81.e1.                                                          | Title          |



|     |                                                                                                                                                                                                                                                |       |
|-----|------------------------------------------------------------------------------------------------------------------------------------------------------------------------------------------------------------------------------------------------|-------|
| 582 | Shrestha S, Manandhar SR, Malla OK. Culture Positive Cases of Ophthalmia Neonatorum in a Tertiary Care Centre of Nepal: A Descriptive Cross-sectional Study. JNMA J Nepal Med Assoc. 2021 Apr 30;59(236):369-373.                              | Title |
| 583 | Cumulative Index. Clinics in Laboratory Medicine. 2004 2004/12/01/;24(4):1037-1064.                                                                                                                                                            | Title |
| 584 | Cumulative Index. Pediatric Clinics of North America. 2005 2005/12/01/;52(6):1805-1872.                                                                                                                                                        | Title |
| 585 | Cumulative Index 1990. Primary Care: Clinics in Office Practice. 1990 1990/12/01/;17(4):905-928.                                                                                                                                               | Title |
| 586 | CUMULATIVE INDEX 1995. Infectious Disease Clinics of North America. 1995 1995/12/01/;9(4):1075-1092.                                                                                                                                           | Title |
| 587 | Cumulative NCE Introduction Index, 1983–2017. In: Goodnow RA, editor. Annual Reports in Medicinal Chemistry. Vol. 50: Academic Press; 2017. p. 621-647.                                                                                        | Title |
| 588 | Aturki Z, Rocco A, Rocchi S, et al. Current applications of miniaturized chromatographic and electrophoretic techniques in drug analysis. Journal of Pharmaceutical and Biomedical Analysis. 2014 2014/12/01/;101:194-220.                     | Title |
| 589 | Current Literature. The Journal of Urology. 1987 1987/06/01/;137(6):1330-1335.                                                                                                                                                                 | Title |
| 590 | Herrera-Ruiz D, Knipp GT. Current Perspectives on Established and Putative Mammalian Oligopeptide Transporters. Journal of Pharmaceutical Sciences. 2003 2003/04/01/;92(4):691-714.                                                            | Title |
| 591 | Gao F, Xiao J, Huang G. Current scenario of tetrazole hybrids for antibacterial activity. European Journal of Medicinal Chemistry. 2019 2019/12/15/;184:111744.                                                                                | Title |
| 592 | Saaby L, Nielsen CU, Steffansen B, et al. Current status of rational design of prodrugs targeting the intestinal di/tri-peptide transporter hPEPT1 (SLC15A1). Journal of Drug Delivery Science and Technology. 2013 2013/01/01/;23(4):307-314. | Title |

|     |                                                                                                                                                                                                                                                                         |          |
|-----|-------------------------------------------------------------------------------------------------------------------------------------------------------------------------------------------------------------------------------------------------------------------------|----------|
| 593 | Jayanthi C, Bedwal A, Rajarathna K. Cutaneous adverse drug reactions from a teaching hospital in Bengaluru: An observational study to determine the spectrum and outcome. National Journal of Physiology, Pharmacy and Pharmacology. 2017;7(5):476.                     | Title    |
| 594 | Weiner CP, Buhimschi C. D. In: Weiner CP, Buhimschi C, editors. Drugs for Pregnant and Lactating Women (Second Edition). Philadelphia: W.B. Saunders; 2009. p. 252-338.                                                                                                 | Title    |
| 595 | Weiner CP, Mason C. D. In: Weiner CP, Mason C, editors. Drugs for Pregnant and Lactating Women (Third Edition). Philadelphia: Elsevier; 2019. p. 187-252.                                                                                                               | Title    |
| 596 | Smith PL, Wall DA, Gochoco CH, et al. (D) Routes of delivery: Case studies: (5) Oral absorption of peptides and proteins. Advanced Drug Delivery Reviews. 1992 1992/03/01/;8(2):253-290.                                                                                | Title    |
| 597 | Cafini F, Aguilar L, Sevillano D, et al. Decrease in bacterial load versus resistance selection of pneumococcal subpopulations by beta-lactam physiological concentrations over time: an in vitro pharmacodynamic simulation. Microb Drug Resist. 2008 Mar;14(1):13-21. | Title    |
| 598 | Namiki Y, Tanabe T, Kobayashi T, et al. Degradation kinetics and mechanisms of a new cephalosporin, cefixime, in aqueous solution. Journal of pharmaceutical sciences. 1987;76(3):208-214.                                                                              | Abstract |
| 599 | Naveed S. Degradation study of different brands of cefixime by UV spectroscopy. international Research Journal of Pharmaceutical Sciences. 2014;5(1).                                                                                                                   | Abstract |
| 600 | KHAN A. DEPARTMENT OF PHARMACY UNIVERSITY OF PESHAWAR.                                                                                                                                                                                                                  | Title    |
| 601 | Gunti SK, Sunil R. Design and characterization of sustained release mini-tablets of Cefixime trihydrate. International Journal of Pharmacy and Biology Sciences. 2014;1(4):79-88.                                                                                       | Abstract |
| 602 | Lal G, Bajpai M. Design and Delivery Characteristics of Extended Release Dosage Form Using a Unique Combination of HPMC K100, Guar Gum and Chitosan as Release Retardant. Current Trends in Biotechnology and Pharmacy. 2021;15(4):416-425.                             | Title    |

|     |                                                                                                                                                                                                                                                                 |          |
|-----|-----------------------------------------------------------------------------------------------------------------------------------------------------------------------------------------------------------------------------------------------------------------|----------|
| 603 | Saifullah S, Kanwal T, Ullah S, et al. Design and development of lipid modified chitosan containing muco-adhesive self-emulsifying drug delivery systems for cefixime oral delivery. Chemistry and Physics of Lipids. 2021;235:105052.                          | Abstract |
| 604 | Babu JR. Design and in vitro Evaluation of Gastroretentive Drug Delivery System of Cefixime Trihydrate. Asian Journal of Pharmaceutics (AJP). 2016;10(04).                                                                                                      | Abstract |
| 605 | Thummel KE, Shen DD, Isoherranen N, et al. Design and optimization of dosage regimens: pharmacokinetic data. Goodman & Gilman's the pharmacological basis of therapeutics, 11th ed McGraw-Hill, New York, NY. 2006:1787-1888.                                   | Title    |
| 606 | Naik SD, Hosamani KM. Design and Synthesis of Novel C4-Linked Substituted 2H-Chromen-2-one-hypoxanthine Hybrids as Potential Antimicrobial Agents: An Approach to Molecular Docking Studies. Journal of Heterocyclic Chemistry. 2019 2019/02/01/;56(2):579-588. | Title    |
| 607 | Baskar B. Design Development and Evaluation of Cefixime Solid Lipid Nanoparticles for Enhancement of Oral Bioavailability: KMCH College Of Pharmacy, Coimbatore; 2020.                                                                                          | Abstract |
| 608 | Mohapatra S, Barik B, Kar R, et al. Design, Development and Optimization of Gastro Retentive Floating Tablets of Cefixime Trihydrate. Asian Journal of Chemistry. 2013;25(13).                                                                                  | Abstract |
| 609 | Rahayu A, Sari DP, Ebtavanny TG. Design, Optimization and Characterization of Cefixime Microspheres. Int J Pharma Res Heal Sci. 2019;7(5):3051-5.                                                                                                               | Abstract |
| 610 | Tahir S, Mahmood T, Dastgir F, et al. Design, synthesis and anti-bacterial studies of piperazine derivatives against drug resistant bacteria. European Journal of Medicinal Chemistry. 2019 2019/03/15/;166:224-231.                                            | Title    |
| 611 | Hay P, Ugwumadu A. Detecting and treating common sexually transmitted diseases. Best Practice & Research Clinical Obstetrics & Gynaecology. 2009 2009/10/01/;23(5):647-660.                                                                                     | Title    |

|     |                                                                                                                                                                                                                                                                                                         |          |
|-----|---------------------------------------------------------------------------------------------------------------------------------------------------------------------------------------------------------------------------------------------------------------------------------------------------------|----------|
| 612 | Shi A, Feng Y, LI K, et al. Determination of Bioequivalence of Cefixime by Three-way Crossover Design. China Pharmacy. 1991.                                                                                                                                                                            | Abstract |
| 613 | Jiang B, Ruan Z, Lou H, et al. Determination of cefaclor in human plasma by reversed-phase high-performance liquid chromatography with UV detection and its application to the bioequivalence studies. Analytical letters. 2009;42(14):2170-2179.                                                       | Title    |
| 614 | Breilh D, Lavallee C, Fratta A, et al. Determination of cefepime and ceftiofime in human serum by high-performance liquid chromatography using an ultrafiltration for antibiotics serum extraction. Journal of Chromatography B: Biomedical Sciences and Applications. 1999 1999/10/29/;734(1):121-127. | Title    |
| 615 | Pisarev V, Zaitseva K, Smirnova L, et al. Determination of cefixime blood plasma levels by HPLC. Antibiotiki i Khimioterapiia= Antibiotics and Chemoterapy [sic]. 2009;54(7-8):37-40.                                                                                                                   | Abstract |
| 616 | Pisarev VV, Zaitseva KV, Smirnova LB, et al. [Determination of cefixime blood plasma levels by HPLC]. Antibiot Khimioter. 2009;54(7-8):37-40.                                                                                                                                                           | Abstract |
| 617 | Talebpour Z, Pourabdollahi H, Rafati H, et al. Determination of cefixime by a validated stability-indicating HPLC method and identification of its related substances by LC-MS/MS studies. Scientia pharmaceutica. 2013;81(2):493-504.                                                                  | Abstract |
| 618 | Liu G, Sha R, Gao S, et al. Determination of cefixime in human plasma and urine using high performance liquid chromatography column switching technique. Yao xue xue bao= Acta pharmaceutica Sinica. 1993;28(3):216-221.                                                                                | Abstract |
| 619 | Zhang H, Zhang J, Shao Z. Determination of Cefixime in Human Plasma with HPLC. China Pharmacy. 2001.                                                                                                                                                                                                    | Abstract |
| 620 | Elias B, Alfeen A. Determination of cefuroxime axetil and cefixime trihydrate in pharmaceutical dosage forms by RP-HPLC Method. Pharm Anal Chem. 2016;2:114.                                                                                                                                            | Abstract |

|     |                                                                                                                                                                                                                                                                                                                                                                        |          |
|-----|------------------------------------------------------------------------------------------------------------------------------------------------------------------------------------------------------------------------------------------------------------------------------------------------------------------------------------------------------------------------|----------|
| 621 | Djabarouti S, Boselli E, Allaouchiche B, et al. Determination of levofloxacin in plasma, bronchoalveolar lavage and bone tissues by high-performance liquid chromatography with ultraviolet detection using a fully automated extraction method. <i>Journal of Chromatography B</i> . 2004 2004/01/05/;799(1):165-172.                                                 | Title    |
| 622 | Toutain J, Boselli E, Djabarouti S, et al. Determination of linezolid in plasma and bronchoalveolar lavage by high-performance liquid chromatography with ultraviolet detection using a fully automated extraction method. <i>Journal of Chromatography B</i> . 2004 2004/12/25/;813(1):145-150.                                                                       | Title    |
| 623 | Cheng C-L, Chou C-H. Determination of metformin in human plasma by high-performance liquid chromatography with spectrophotometric detection. <i>Journal of Chromatography B: Biomedical Sciences and Applications</i> . 2001 2001/10/05/;762(1):51-58.                                                                                                                 | Title    |
| 624 | Lemoine T, Breilh D, Ducint D, et al. Determination of moxifloxacin (BAY 12-8039) in plasma and lung tissue by high-performance liquid chromatography with ultraviolet detection using a fully automated extraction method with a new polymeric cartridge. <i>Journal of Chromatography B: Biomedical Sciences and Applications</i> . 2000 2000/06/09/;742(2):247-254. | Title    |
| 625 | Garraffo R, Drugeon H, Dellamonica P, et al. Determination of optimal dosage regimen for amikacin in healthy volunteers by study of pharmacokinetics and bactericidal activity. <i>Antimicrobial Agents and Chemotherapy</i> . 1990;34(4):614-621.                                                                                                                     | Title    |
| 626 | Molina F, Jehl F, Gallion C, et al. Determination of the third generation oral cephalosporin cefpodoxime in biological fluids by high-speed high-performance liquid chromatography. <i>Journal of Chromatography B: Biomedical Sciences and Applications</i> . 1991 1991/01/18/;563(1):205-210.                                                                        | Title    |
| 627 | Pehourcq F, Jarry C. Determination of third-generation cephalosporins by high-performance liquid chromatography in connection with pharmacokinetic studies. <i>Journal of Chromatography A</i> . 1998;812(1-2):159-178.                                                                                                                                                | Abstract |

|     |                                                                                                                                                                                                                                                                                                                                                 |          |
|-----|-------------------------------------------------------------------------------------------------------------------------------------------------------------------------------------------------------------------------------------------------------------------------------------------------------------------------------------------------|----------|
| 628 | Kamran M, Khan MA, Shafique M, et al. Development and Characterization of Binary Solid Lipid Nano Suspension of Atorvastatin: In-Vitro Drug Release and In-Vivo Pharmacokinetic Studies. <i>Nanoscience and Nanotechnology Letters</i> . 2019;11(11):1522-1530.                                                                                 | Title    |
| 629 | Khan QU, Siddique MI, Rasool F, et al. Development and characterization of orodispersible film containing cefixime trihydrate. <i>Drug Dev Ind Pharm</i> . 2020 Dec;46(12):2070-2080.                                                                                                                                                           | Abstract |
| 630 | Gade PP, Iqbal MM, Rao KS. Development and In-Vitro Evaluation of Gastro-Retentive Floating Drug Delivery System of Cefixime Trihydrate. <i>Magnesium</i> . 2009;55(55):55.                                                                                                                                                                     | Abstract |
| 631 | Adam EH, Saeed AE, Barakat IE. Development and validation of a high performance liquid chromatography method for determination of cefixime trihydrate and its degraded products formed under stress condition of UV light. <i>International Journal of Pharmaceutical Sciences and Research</i> . 2012;3(2):469.                                | Abstract |
| 632 | Kundu S, Majumder T, Barat PK, et al. Development and validation of a HPLC-UV method for simultaneous determination of cefixime and ofloxacin in tablet formulation. <i>International Journal of Pharmaceutical Sciences and Research</i> . 2015;6(2):884.                                                                                      | Abstract |
| 633 | Mathew C, Swathi B, Ajitha M, et al. Development and validation of a new and economical stability indicating RP-HPLC method for cefixime trihydrate. <i>Brazilian Journal of Pharmaceutical Sciences</i> . 2016;52:87-94.                                                                                                                       | Abstract |
| 634 | Gouda AA, Hashem H, Jira T. Development and validation of a rapid stability indicating HPLC-method using monolithic stationary phase and two spectrophotometric methods for determination of antihistaminic acrivastine in capsules. <i>Spectrochimica Acta Part A: Molecular and Biomolecular Spectroscopy</i> . 2014 2014/09/15/;130:480-487. | Title    |

|     |                                                                                                                                                                                                                                                                    |          |
|-----|--------------------------------------------------------------------------------------------------------------------------------------------------------------------------------------------------------------------------------------------------------------------|----------|
| 635 | Bhinge SD, Malipatil SM. Development and validation of a stability-indicating method for the simultaneous estimation of cefixime and dicloxacillin using the RP-HPLC method. Journal of Taibah University for Science. 2016;10(5):734-744.                         | Abstract |
| 636 | Islambulchilar Z, Ghanbarzadeh S, Emami S, et al. Development and validation of an HPLC method for the analysis of sirolimus in drug products. Advanced pharmaceutical bulletin. 2012;2(2):135.                                                                    | Title    |
| 637 | He G, Mai L, Wang X. Development and validation of an HPLC-MS/MS method for rapid simultaneous determination of cefprozil diastereomers in human plasma. International Journal of Analytical Chemistry. 2018;2018.                                                 | Title    |
| 638 | Shah V, Raj H. Development and validation of derivative spectroscopic method for simultaneous estimation of cefixime trihydrate and azithromycin dihydrate in combined dosage form. International Journal of Pharmaceutical Sciences And Research. 2012;3(6):1753. | Abstract |
| 639 | Naveen C. Development and Validation of HPTLC Method for Cefixime, Cefpodoxime, Cefepime in Bulk and Pharmaceutical Dosage form and Analytical and Bioanalytical Method for Brivudine: Sri Ramakrishna Institute of Paramedical Sciences, Coimbatore; 2017.        | Abstract |
| 640 | Al-Laham MK. Development and Validation of Spectrophotometric Method for Determination of Cefixime and Glimepiride by Ternary complex Formation: Batch2; 2013.                                                                                                     | Abstract |
| 641 | Wale R, Pandharkar T, Kalyankar TM, et al. Development and Validation of Spectrophotometric Methods for Simultaneous Estimation of Cefixime Trihydrate and Linezolid in Tablet Dosage Form.                                                                        | Abstract |
| 642 | Nayon MAU, Nesa J-U, Uddin MN, et al. Development and validation of UV Spectrometric Method for the Determination of Cefixime trihydrate in Bulk and Pharmaceutical Formulation. Asian Journal of Biomedical and Pharmaceutical Sciences. 2013;3(22):15.           | Abstract |

|     |                                                                                                                                                                                                                                                                |          |
|-----|----------------------------------------------------------------------------------------------------------------------------------------------------------------------------------------------------------------------------------------------------------------|----------|
| 643 | Aher SS, Saudagar R. Development and validation of UV Spectrophotometric Method for determination of Cefixime Trihydrate and Ornidazole in tablet dosage form. Research Journal of Pharmacy and Technology. 2014;7(9):4.                                       | Abstract |
| 644 | Jayasundara P. Development of a within-host mathematical model of urethral gonorrhoea infection and application to treatment: UNSW Sydney; 2022.                                                                                                               | Title    |
| 645 | Darabi R, Shabani-Nooshabadi M. Development of an amplified nanostructured electrochemical sensor for the detection of cefixime in pharmaceuticals and biological samples. Journal of Pharmaceutical and Biomedical Analysis. 2022;212:114657.                 | Abstract |
| 646 | Patel D, Akhtar J, Master S, et al. DEVELOPMENT OF ANALYTICAL METHOD FOR SIMULTANEOUS ESTIMATION OF CEFIXIME AND LINEZOLID DEVELOPMENT OF ANALYTICAL METHOD FOR SIMULTANEOUS ESTIMATION OF CEFIXIME AND LINEZOLID IN TABLET DOSAGE FORM IN TABLET DOSAGE FORM. | Abstract |
| 647 | Akhtar J, Baghel M, Patel D. Development of Analytical Method for Simultaneous Estimation of Cefixime and Linezolid in Tablet Dosage Form. Research Journal of Pharmacy and Technology. 2013;6(5):592-594.                                                     | Abstract |
| 648 | Arshad HM, Gauhar S, Bano R, et al. Development of HPLC-UV method for analysis of cefixime in raw materials and in capsule. Jordan journal of pharmaceutical sciences. 2009;2(1):53-65.                                                                        | Abstract |
| 649 | Jones RN, Gerlach EH, Koontz FP, et al. Development of Neisseria gonorrhoeae in vitro susceptibility test methods for cefixime including quality control guidelines. Diagnostic microbiology and infectious disease. 1991;14(5):383-388.                       | Abstract |
| 650 | Hook III EW, Newman L, Drusano G, et al. Development of new antimicrobials for urogenital gonorrhea therapy: clinical trial design considerations. Clinical Infectious Diseases. 2020;70(7):1495-1500.                                                         | Title    |



|     |                                                                                                                                                                                                                                                                                                                                               |          |
|-----|-----------------------------------------------------------------------------------------------------------------------------------------------------------------------------------------------------------------------------------------------------------------------------------------------------------------------------------------------|----------|
| 651 | Erdoğan N. Development of oral tablet formulation containing erlotinib: Randomly methylated- $\beta$ -cyclodextrin inclusion complex using direct compression method. Turkish Journal of Pharmaceutical Sciences. 2021;18(5):589.                                                                                                             | Title    |
| 652 | Zhang D, Armour E, Sherma J. Development of quantitative HPTLC–densitometry methods following a model approach for transfer of TLC screening methods for pharmaceutical products of cefixime, cefuroxime axetil, cephalexin· H <sub>2</sub> O, ciprofloxacin HCl, levofloxacin, and metronidazole. Acta Chromatographica. 2017;29(4):484-486. | Abstract |
| 653 | Prabakaran C. Development of Solid Oral Flexible Tablet OFT Formulation Platform for Pediatric and Geriatric Drug Delivery.                                                                                                                                                                                                                   | Title    |
| 654 | DGHM 2016 Abstractband. International Journal of Medical Microbiology. 2016 2016/12/01/;306(8, Supplement 1):1-149.                                                                                                                                                                                                                           | Title    |
| 655 | Dykewicz MS, Fineman S, Skoner DP, et al. Diagnosis and Management of Rhinitis: Complete Guidelines of the Joint Task Force on Practice Parameters in Allergy, Asthma and Immunology. Annals of Allergy, Asthma & Immunology. 1998 1998/11/01/;81(5):478-518.                                                                                 | Title    |
| 656 | Incaudo GA. THE DIAGNOSIS AND TREATMENT OF RHINOSINUSITIS DURING PREGNANCY AND LACTATION. Radiologic Clinics of North America. 2000 2000/11/01/;20(4):807-830.                                                                                                                                                                                | Title    |
| 657 | Fendrick AM, Saint S, Brook I, et al. Diagnosis and treatment of upper respiratory tract infections in the primary care setting. Clinical Therapeutics. 2001 2001/10/01/;23(10):1683-1706.                                                                                                                                                    | Title    |
| 658 | Yang X, Zhang Y, Lin H, et al. Diagnostic Value of the Triple Combination of Serum Heparin-Binding Protein, Procalcitonin, and C-Reactive Protein in Children with Acute Bacterial Upper Respiratory Tract Infection. J Healthc Eng. 2022;2022:1877960.                                                                                       | Title    |

|     |                                                                                                                                                                                                                                                                                     |          |
|-----|-------------------------------------------------------------------------------------------------------------------------------------------------------------------------------------------------------------------------------------------------------------------------------------|----------|
| 659 | Winchester JF. Dialysis and hemoperfusion in poisoning. <i>Advances in Renal Replacement Therapy</i> . 2002<br>2002/01/01/;9(1):26-30.                                                                                                                                              | Title    |
| 660 | Ludwig E, Miglioli P, Ragazzi E, et al. Diarrhea in intensive care: diagnosis and treatment G. Bleichner, O. Thomas and JP Sollet Controversies on pharmacokinetics of fluoroquinolones in elderly patients. <i>International Journal of Antimicrobial Agents</i> . 1994;3:285-287. | Title    |
| 661 | KANT R, BODLA R, BHUTANI R, et al. Difference Spectrophotometric Method For Simultaneous Estimation of Moxifloxacin And Cefixime Trihydrate in Bulk and Combined Dosage Form. <i>International Journal of pharmacy and pharmaceutical sciences</i> , 7 (9). 2015:316-321.           | Abstract |
| 662 | Phanucharas JP, Gorby GL. Differential intracellular efficacies of ciprofloxacin and cefixime against <i>Neisseria gonorrhoeae</i> in human fallopian tube organ culture. <i>Antimicrobial agents and chemotherapy</i> . 1997;41(7):1547-1551.                                      | Abstract |
| 663 | Quinet B, Bégué P. Diffusion des antibiotiques dans l'oreille. Limites de l'apport de cette information. <i>Médecine et Maladies Infectieuses</i> . 1992 1992/02/01/;22:95-102.                                                                                                     | Title    |
| 664 | Stewart BH, Chan OH, Jezyk N, et al. Discrimination between drug candidates using models for evaluation of intestinal absorption. <i>Advanced Drug Delivery Reviews</i> . 1997 1997/01/15/;23(1):27-45.                                                                             | Title    |
| 665 | Herrman J. Discussion session 1. <i>Veterinary Microbiology</i> . 1993 1993/06/01/;35(3):227-231.                                                                                                                                                                                   | Title    |
| 666 | Halperin-Walega E, Batra VK, Tonelli AP, et al. Disposition of cefixime in the pregnant and lactating rat. Transfer to the fetus and nursing pup. <i>Drug Metab Dispos</i> . 1988 Jan-Feb;16(1):130-4.                                                                              | Animal   |
| 667 | St Peter J, Borin M, Hughes G, et al. Disposition of cefpodoxime proxetil in healthy volunteers and patients with impaired renal function. <i>Antimicrobial agents and chemotherapy</i> . 1992;36(1):126-131.                                                                       | Title    |
| 668 | Ilgaz F, Timur SS, Eylem CC, et al. Do Thickening Agents Used in Dysphagia Diet Affect Drug Bioavailability? <i>European Journal of Pharmaceutical Sciences</i> . 2022 2022/07/01/;174:106197.                                                                                      | Title    |

|     |                                                                                                                                                                                                                                                                             |          |
|-----|-----------------------------------------------------------------------------------------------------------------------------------------------------------------------------------------------------------------------------------------------------------------------------|----------|
| 669 | Tomić Z, Tomas A, Vukmirović S, et al. Do we bury antibacterials when launching? Cefaclor example. Journal of pharmaceutical sciences. 2016;105(3):1295-1300.                                                                                                               | Title    |
| 670 | Banerjee A, Pal S, Goswami P, et al. Docking analysis of circulating CTX-M variants in multi-drug resistant, beta-lactamase and biofilm-producing E. coli isolated from pet animals and backyard livestock. Microbial Pathogenesis. 2022 2022/09/01/;170:105700.            | Animal   |
| 671 | Kenyon CR, De Baetselier I, Crucitti T. Does gonorrhoea screening intensity play a role in the early selection of antimicrobial resistance in men who have sex with men (MSM)? A comparative study of Belgium and the United Kingdom. F1000Research. 2018;7.                | Title    |
| 672 | Bialer M, Batra VK, Morrison JA, et al. Dose-dependent pharmacokinetics of a new oral cephalosporin, cefixime, in the dog. Pharmaceutical research. 1987;4(1):33-37.                                                                                                        | Animal   |
| 673 | Higashimori M, Yamaoka K, Nakagawa T. Dose-Dependency in Local Disposition of 5-Fluorouracil under Non-Steady-State Condition in Rat Liver. Journal of Pharmaceutical Sciences. 2000 2000/01/01/;89(1):100-107.                                                             | Animal   |
| 674 | Lin JH. Dose-dependent pharmacokinetics: experimental observations and theoretical considerations. Biopharmaceutics & drug disposition. 1994;15(1):1-31.                                                                                                                    | Title    |
| 675 | Raz R, Rottensterich E, Leshem Y, et al. Double-blind study comparing 3-day regimens of cefixime and ofloxacin in treatment of uncomplicated urinary tract infections in women. Antimicrobial agents and chemotherapy. 1994;38(5):1176-1177.                                | Abstract |
| 676 | Iravani A, Richard GA, Johnson D, et al. A double-blind, multicenter, comparative study of the safety and efficacy of cefixime versus amoxicillin in the treatment of acute urinary tract infections in adult patients. The American journal of medicine. 1988;85(3):17-23. | Abstract |

|     |                                                                                                                                                                                                                                                              |          |
|-----|--------------------------------------------------------------------------------------------------------------------------------------------------------------------------------------------------------------------------------------------------------------|----------|
| 677 | Imran M, Shah MR, Ullah F, et al. Double-tailed acyl glycoside niosomal nanocarrier for enhanced oral bioavailability of Cefixime. <i>Artificial cells, nanomedicine, and biotechnology</i> . 2017;45(7):1440-1451.                                          | Abstract |
| 678 | Cantt N. Dr. Yasar Shah: Department of Pharmacy, University of Peshawar, Pakistan; 1999.                                                                                                                                                                     | Title    |
| 679 | Blowey BL, Leeder JS, Blowey DL. Drug Administration and Pharmacogenomics in Children Receiving Acute or Chronic Renal Replacement Therapy. <i>Pediatric Dialysis</i> : Springer; 2021. p. 683-707.                                                          | Title    |
| 680 | Lassiter J, Bennett WM, Olyaei AJ. Drug Dosing in Elderly Patients with Chronic Kidney Disease. <i>Clinics in Geriatric Medicine</i> . 2013 2013/08/01/;29(3):657-705.                                                                                       | Title    |
| 681 | Petitjean O, Nicolas P, Tod M. Drug interaction and pharmacological considerations during anti-infective therapy in cancer patients. <i>Infectious Complications of Cancer</i> . 1995:255-280.                                                               | Title    |
| 682 | Klotz U, Kroemer HK. The drug interaction potential of ranitidine: An update. <i>Pharmacology &amp; Therapeutics</i> . 1991 1991/01/01/;50(2):233-244.                                                                                                       | Title    |
| 683 | Kapp PA, Klop A, Jenkins L. Drug interactions in primary health care in the George subdistrict, South Africa: a cross-sectional study. <i>South African Family Practice</i> . 2013;55(1):78-84.                                                              | Title    |
| 684 | Wallace RJ, Brown BA, Griffith DE. Drug intolerance to high-dose clarithromycin among elderly patients. <i>Diagnostic Microbiology and Infectious Disease</i> . 1993 1993/03/01/;16(3):215-221.                                                              | Title    |
| 685 | Sharma C, Endow A, Dey R, et al. Drug prescribing pattern for wheezers below one year of age: A cross-sectional study at tertiary care hospital from Northeast India. <i>National Journal of Physiology, Pharmacy and Pharmacology</i> . 2020;10(5):413-413. | Title    |
| 686 | Hashempour-Baltork F, Hosseini H, Shojaee-Aliabadi S, et al. Drug resistance and the prevention strategies in food borne bacteria: An update review. <i>Advanced pharmaceutical bulletin</i> . 2019;9(3):335.                                                | Title    |
| 687 | Davis GA, Chandler MHH. DRUG THERAPY AND DRUG INTERACTIONS. <i>Oral and Maxillofacial Surgery Clinics of North America</i> . 1996 1996/05/01/;8(2):245-263.                                                                                                  | Title    |

|     |                                                                                                                                                                                                                              |       |
|-----|------------------------------------------------------------------------------------------------------------------------------------------------------------------------------------------------------------------------------|-------|
| 688 | Thacker KB, Chaudhari V, Patel S, et al. A drug utilization study in pregnancy at a tertiary care teaching hospital. <i>National Journal of Physiology, Pharmacy and Pharmacology</i> . 2021;11(3):308-308.                  | Title |
| 689 | Harris KA, Garey KW, Rodvold KA. Drug-Food interactions. <i>Drug interactions in infectious diseases</i> : Springer; 2005. p. 383-430.                                                                                       | Title |
| 690 | Sprandel-Harris K, Yoo L, Rodvold KA. Drug-Food Interactions. <i>Drug Interactions in Infectious Diseases</i> : Springer; 2011. p. 73-130.                                                                                   | Title |
| 691 | Oravcova J, Bořhs B, Lindner W. Drug-protein binding studies new trends in analytical and experimental methodology. <i>Journal of Chromatography B: Biomedical Sciences and Applications</i> . 1996 1996/02/23/;677(1):1-28. | Title |
| 692 | Franz CC. Drug-related problems and dosage adjustment in patients with liver disease: <i>University_of_Basel</i> ; 2012.                                                                                                     | Title |
| 693 | Jacobs MR. Drug-resistant <i>Streptococcus pneumoniae</i> : rational antibiotic choices. <i>The American Journal of Medicine</i> . 1999 1999/05/03/;106(5, Supplement 1):19-25.                                              | Title |
| 694 | Conner KG. Drug–Nutrient Interactions. In: Caballero B, editor. <i>Encyclopedia of Human Nutrition</i> (Third Edition). Waltham: Academic Press; 2013. p. 90-98.                                                             | Title |
| 695 | Garey KW, Rodvold KA. Drug—Food Interactions. <i>Drug Interactions in Infectious Diseases</i> : Springer; 2001. p. 249-285.                                                                                                  | Title |
| 696 | Howard CR, Lawrence RA. Drugs and Breastfeeding. <i>Clinics in Perinatology</i> . 1999 1999/06/01/;26(2):447-478.                                                                                                            | Title |
| 697 | Moran JS, Levine WC. Drugs of choice for the treatment of uncomplicated gonococcal infections. <i>Clinical Infectious Diseases</i> . 1995;20(Supplement_1):S47-S65.                                                          | Title |

|     |                                                                                                                                                                                                                                                                                                                                          |          |
|-----|------------------------------------------------------------------------------------------------------------------------------------------------------------------------------------------------------------------------------------------------------------------------------------------------------------------------------------------|----------|
| 698 | Gece G. Drugs: A review of promising novel corrosion inhibitors. <i>Corrosion Science</i> . 2011;53(12):3873-3898.                                                                                                                                                                                                                       | Title    |
| 699 | Bachmann LH, Desmond RA, Stephens J, et al. Duration of persistence of gonococcal DNA detected by ligase chain reaction in men and women following recommended therapy for uncomplicated gonorrhoea. <i>J Clin Microbiol</i> . 2002 Oct;40(10):3596-601.                                                                                 | Title    |
| 700 | Ramirez JA, Srinath L, Ahkee S, et al. Early switch from intravenous to oral cephalosporins in the treatment of hospitalized patients with community-acquired pneumonia [Clinical Trial; Journal Article; Randomized Controlled Trial; Research Support, Non-U.S. Gov't]. <i>Archives of internal medicine</i> . 1995;155(12):1273-1276. | Abstract |
| 701 | ECC-4 Abstracts. <i>International Journal of Antimicrobial Agents</i> . 2002 2002/05/01;19:S1-S105.                                                                                                                                                                                                                                      | Title    |
| 702 | Ahmad A, Dutta J. Ecotoxicological studies of cephalosporin antibiotics on <i>Daphnia magna</i> . <i>Toxicol Int</i> . 2018;25:21-30.                                                                                                                                                                                                    | Abstract |
| 703 | Callaghan R, Desmond PV, Masheord ML. The effect of a nutritional model of chronic liver injury on the hepatic glucuronidation of morphine in rats. <i>Journal of pharmacy and pharmacology</i> . 1993;45(11):998-999.                                                                                                                   | Animal   |
| 704 | Shyu W, Wilber R, Pittman K, et al. Effect of antacid on the bioavailability of cefprozil. <i>Antimicrobial agents and chemotherapy</i> . 1992;36(5):962-965.                                                                                                                                                                            | Title    |
| 705 | Sullivan Å, Edlund C, Nord CE. Effect of antimicrobial agents on the ecological balance of human microflora. <i>The Lancet Infectious Diseases</i> . 2001 2001/09/01;1(2):101-114.                                                                                                                                                       | Title    |
| 706 | Nord CE. The effect of antimicrobial agents on the ecology of the human intestinal microflora. <i>Veterinary Microbiology</i> . 1993 1993/06/01;35(3):193-197.                                                                                                                                                                           | Title    |
| 707 | Wiedermann BL, Schwartz RH. Effect of blood contamination on the interpretation of antibiotic concentrations in middle ear fluid. <i>Pediatr Infect Dis J</i> . 1992 Mar;11(3):244-5.                                                                                                                                                    | Title    |

|     |                                                                                                                                                                                                                                          |          |
|-----|------------------------------------------------------------------------------------------------------------------------------------------------------------------------------------------------------------------------------------------|----------|
| 708 | Tomiyama M. The effect of cefaclor and cefixime on nasopharyngeal pathogens in children [Clinical Trial; Controlled Clinical Trial; English Abstract; Journal Article]. Nihon Jibiinkoka Gakkai kaiho. 1995;98(4):659-668.               | Abstract |
| 709 | Niwa T, Shiraga T, Hashimoto T, et al. Effect of cefixime and cefdinir, oral cephalosporins, on cytochrome P450 activities in human hepatic microsomes. Biological and Pharmaceutical Bulletin. 2004;27(1):97-99.                        | Abstract |
| 710 | Kumar V, Lal J, Singh MM, et al. Effect of concurrently coadministered drugs on the pharmacokinetic/pharmacodynamic profile of centchroman, a nonsteroidal oral contraceptive, in rats. Contraception. 2006;74(2):165-173.               | Animal   |
| 711 | Dalhoff K, Kanfer I. Effect of Food on Bioavailability and the Assessment of Bioequivalence. Generic Drug Product Development: CRC Press; 2007. p. 228-253.                                                                              | Title    |
| 712 | Mohammed MF. Effect of green tea on the effectiveness of Cefixime on Escherichia coli and Pseudomonas aeruginosa bacteria. Tikret Journal of Pharmaceutical Sciences. 2011;7(1).                                                         | Abstract |
| 713 | Singlas E, Lebrec D, Gaudin C, et al. Effect of hepatic failure upon the pharmacokinetics of cefixime. Presse Medicale (Paris, France: 1983). 1989;18(32):1587-1588.                                                                     | Abstract |
| 714 | Bollam V, Doodle J, Anisetti R. Effect of lansoprazole on pharmacokinetics of nebivolol in hypertensive patients. Annals of Biological Research. 2013;4(10):6-10.                                                                        | Title    |
| 715 | Morimoto K, Kishimura K, Nagami T, et al. Effect of Milk on the Pharmacokinetics of Oseltamivir in Healthy Volunteers. Journal of Pharmaceutical Sciences. 2011 2011/09/01/;100(9):3854-3861.                                            | Title    |
| 716 | Koitabashi Y, Kumai T, Matsumoto N, et al. The effect of orange juice on the pharmacokinetics of the 3-hydroxy-3-methylglutaryl COA (HMG-COA) reductase inhibitor pravastatin. Clinical Pharmacology & Therapeutics. 2004;75(2):P77-P77. | Title    |

|     |                                                                                                                                                                                                                                                                                                   |          |
|-----|---------------------------------------------------------------------------------------------------------------------------------------------------------------------------------------------------------------------------------------------------------------------------------------------------|----------|
| 717 | Kurkov SV, Madden DE, Carr D, et al. The effect of parenterally administered cyclodextrins on the pharmacokinetics of coadministered drugs. <i>Journal of pharmaceutical sciences</i> . 2012;101(12):4402-4408.                                                                                   | Title    |
| 718 | Yano Y, Yamaoka K, Yasui H, et al. Effect of perfusion rate on the local disposition of cefixime in liver perfusion system based on two-compartment dispersion model. <i>Drug Metab Dispos</i> . 1991 Nov-Dec;19(6):1022-7.                                                                       | Abstract |
| 719 | Liaqat A, Khan A-u, Asad M, et al. Effect of Quinolones Versus Cefixime on International Normalized Ratio Levels After Valve Replacement Surgery with Warfarin Therapy. <i>Medicina</i> . 2019;55(10):644.                                                                                        | Abstract |
| 720 | Borin MT, Driver MR, Forbes KK. Effect of timing of food on absorption of cefpodoxime proxetil. <i>The Journal of Clinical Pharmacology</i> . 1995;35(5):505-509.                                                                                                                                 | Title    |
| 721 | Samanthula KS, Bairi AG, Satla SR, et al. Effect of various Polymers on Drug Release from Mucoadhesive Tablets of Cefixime Trihydrate. 2021.                                                                                                                                                      | Abstract |
| 722 | Edlund C, Nord CE. Effect on the human normal microflora of oral antibiotics for treatment of urinary tract infections. <i>Journal of antimicrobial chemotherapy</i> . 2000;46(suppl_1):41-48.                                                                                                    | Title    |
| 723 | Al-Huseini LMA, Swadi AA, Swadi SM. Effective cefixime treatment in pregnant women with urinary tract infection. <i>J Chem Pharm Res</i> . 2016;8(2):73-8.                                                                                                                                        | Abstract |
| 724 | Al-Tamimi M, Abu-Raideh J, Albalawi H, et al. Effective oral combination treatment for extended-spectrum beta-lactamase-producing <i>Escherichia coli</i> . <i>Microbial Drug Resistance</i> . 2019;25(8):1132-1141.                                                                              | Title    |
| 725 | Korting H, Kollmann M. Effective single dose treatment of uncomplicated gonorrhoea. <i>International journal of STD &amp; AIDS</i> . 1994;5(4):239-243.                                                                                                                                           | Title    |
| 726 | Hamid OA, Dokhan MAAA, El Gamea A, et al. Effectiveness and safety of cefpodoxime in upper respiratory tract infections in adult Egyptian population a report from the Egyptian STAR registry. <i>Egyptian Journal of Ear, Nose, Throat and Allied Sciences</i> . 2017 2017/07/01/;18(2):131-135. | Title    |



|     |                                                                                                                                                                                                                                                                         |                |
|-----|-------------------------------------------------------------------------------------------------------------------------------------------------------------------------------------------------------------------------------------------------------------------------|----------------|
| 727 | Carstens C, Hostalek U. [Effectiveness and tolerance of cefixime in bacterial urinary tract infections in patients with myelomeningocele]. <i>Klin Padiatr.</i> 1994 Jan-Feb;206(1):22-5.                                                                               | Not Accessible |
| 728 | Weissbach L, Segal A, Tröster K. Effectiveness and tolerance of cefixime in the treatment of acute pyelonephritis. <i>Infection.</i> 1990;18:S140-4.                                                                                                                    | Abstract       |
| 729 | VOGEL F. EFFECTIVENESS OF ORAL CEPHALOSPORINS. <i>INNERE MEDIZIN.</i> 1991;18(6):150-156.                                                                                                                                                                               | Abstract       |
| 730 | McBroom M, Barbaro D. The effectiveness of oral suppression in high risk prosthetic joint infections after total knee arthroplasty. <i>International Journal of Infectious Diseases.</i> 2010;14:e197-e198.                                                             | Title          |
| 731 | The effects of adenotonsillectomy on growth in young children: Williams E.F. III; Woo P.; Miller R.; Kellman R.M. <i>OTOLARYNGOL. HEAD NECK SURG.</i> (1991) 104/4 (509–516). <i>International Journal of Pediatric Otorhinolaryngology.</i> 1992 1992/01/01;23(1):101. | Title          |
| 732 | Maraki S, Barbounakis E, Chatzinikolaou I, et al. Effects of cefepime, cefixime and ceftibuten on murine gut colonization by <i>Candida albicans</i> . <i>Chemotherapy.</i> 1998;44(6):405-408.                                                                         | Abstract       |
| 733 | AHmadi Z, Ramezani M, Sohrabi D. Effects of Cefixime on the Testis Structure and Pituitary-Gonadal Hormones in Adult Balb/C Mice. <i>J Adv Med Biomed Res.</i> 2011;19(74):54-62.                                                                                       | Animal         |
| 734 | Li Y, Revalde J, Paxton JW. The effects of dietary and herbal phytochemicals on drug transporters. <i>Advanced Drug Delivery Reviews.</i> 2017 2017/07/01;116:45-62.                                                                                                    | Title          |
| 735 | Singh BN. Effects of food on clinical pharmacokinetics. <i>Clinical pharmacokinetics.</i> 1999;37(3):213-255.                                                                                                                                                           | Title          |
| 736 | Yang N, Zhan Y, Wan J, et al. Effects of Lacidophilin Tablets, Yogurt, and Bifid Triple Viable Capsules on the Gut Microbiota of Mice with Antibiotic-Associated Diarrhea. <i>Canadian Journal of Infectious Diseases and Medical Microbiology.</i> 2022;2022.          | Animal         |

|     |                                                                                                                                                                                                                                                             |          |
|-----|-------------------------------------------------------------------------------------------------------------------------------------------------------------------------------------------------------------------------------------------------------------|----------|
| 737 | Deslandes A, Camus F, Lacroix C, et al. Effects of nifedipine and diltiazem on pharmacokinetics of cefpodoxime following its oral administration. <i>Antimicrobial agents and chemotherapy</i> . 1996;40(12):2879-2881.                                     | Title    |
| 738 | Kennedy JM, Van Riji AM. Effects of surgery on the pharmacokinetic parameters of drugs. <i>Clinical pharmacokinetics</i> . 1998;35(4):293-312.                                                                                                              | Title    |
| 739 | van Riet-Nales DA, Schobben AFAM, Egberts TCG, et al. Effects of the pharmaceutical technologic aspects of oral pediatric drugs on patient-related outcomes: A systematic literature review. <i>Clinical Therapeutics</i> . 2010 2010/05/01/;32(5):924-938. | Title    |
| 740 | Iwasaki K, Matsuda H, Nagase K, et al. Effects of twenty-three drugs on the metabolism of FK506 by human liver microsomes. <i>Res Commun Chem Pathol Pharmacol</i> . 1993 Nov;82(2):209-16.                                                                 | Title    |
| 741 | Jacobs MR, Bajaksouzian S, Windau A, et al. Effects of various test media on the activities of 21 antimicrobial agents against <i>Haemophilus influenzae</i> . <i>J Clin Microbiol</i> . 2002 Sep;40(9):3269-76.                                            | Title    |
| 742 | Helwig H, Luchtrath M, Hostalek U. Efficacy and safety of cefixime once daily compared to twice daily in otitis media, URTI and LRTI in children [Journal: Conference Paper]. <i>Journal of drug development, supplement</i> . 1993;6(1):27-29.             | Abstract |
| 743 | Adam D, Hostalek U. Efficacy and safety of cefixime once daily vs. penicillin V three times daily in bacterial pharyngitis and tonsillitis in children [Journal: Conference Paper]. <i>Journal of drug development, supplement</i> . 1993;6(1):31-33.       | Abstract |
| 744 | Neu HC, Chick TW. Efficacy and safety of clarithromycin compared to cefixime as outpatient treatment of lower respiratory tract infections. <i>Chest</i> . 1993;104(5):1393-1399.                                                                           | Abstract |
| 745 | Mohammed T, Tawab H, El-Moktader A. Efficacy and safety of oral cefixime for the short-term treatment of typhoid fever in a group of egyptian children. <i>Der Pharmacia Lettre</i> . 2018;10:11-23.                                                        | Abstract |

|     |                                                                                                                                                                                                                                                                                             |                   |
|-----|---------------------------------------------------------------------------------------------------------------------------------------------------------------------------------------------------------------------------------------------------------------------------------------------|-------------------|
| 746 | Unal S. Efficacy and tolerability of switch therapy with oral cefixime in lower respiratory tract infections. 2000.                                                                                                                                                                         | Abstract          |
| 747 | Cars O. Efficacy of beta-lactam antibiotics: integration of pharmacokinetics and pharmacodynamics. Diagnostic microbiology and infectious disease. 1997;27(1-2):29-33.                                                                                                                      | Title             |
| 748 | Ryzhko IV, Shcherbaniuk AI, Moldavan IA, et al. [Efficacy of cefixime and cefepime vs. other cephalosporins in experimental plague of albino mice due to variants FI+ and FI- of the plague microbe]. Antibiot Khimioter. 2007;52(9-10):24-7.                                               | Animal            |
| 749 | Mora R, Salami A, Mora F, et al. Efficacy of cefpodoxime in the prophylaxis of recurrent pharyngotonsillitis. International Journal of Pediatric Otorhinolaryngology. 2003 2003/12/01/;67:S225-S228.                                                                                        | Title             |
| 750 | Haynes AM, Giacani L, Mayans MV, et al. Efficacy of linezolid on Treponema pallidum, the syphilis agent: A preclinical study. EBioMedicine. 2021 2021/03/01/;65:103281.                                                                                                                     | Title             |
| 751 | Samarinas M, Skriapas K, Karatzas A, et al. Efficacy of prophylactic administration of prurifloxacin vs. cefixime in patients undergoing ultrasound guided prostate biopsy: a prospective randomized study [Journal: Conference Abstract]. European urology, supplements. 2019;18(1):e118-. | Extensive reading |
| 752 | Abrishamkar M, Ehsani Tilami S, Hosseini Kaldozakh S. Electrocatalytic oxidation of cefixime at the surface of modified carbon paste electrode with synthesized nano zeolite. Advanced Journal of Chemistry-Section A. 2020;3(5):767-776.                                                   | Abstract          |
| 753 | Electronic Posters. Urology. 2012 2012/09/01/;80(3, Supplement):S189-S345.                                                                                                                                                                                                                  | Title             |
| 754 | Esposito S, Principi N. Emerging resistance to antibiotics against respiratory bacteria: impact on therapy of community-acquired pneumonia in children. Drug Resistance Updates. 2002 2002/04/01/;5(2):73-87.                                                                               | Title             |
| 755 | Naghibi S, Sahebi H. Employment of modified Fe(3) O(4) nanoparticles using thermo-sensitive polymer for extraction and pre-concentration of cefexime in biological samples. Biomed Chromatogr. 2018 Feb;32(2).                                                                              | Abstract          |

|     |                                                                                                                                                                                                                                                                                                                  |       |
|-----|------------------------------------------------------------------------------------------------------------------------------------------------------------------------------------------------------------------------------------------------------------------------------------------------------------------|-------|
| 756 | Valamla B, Thakor P, Phuse R, et al. Engineering drug delivery systems to overcome the vaginal mucosal barrier: Current understanding and research agenda of mucoadhesive formulations of vaginal delivery. <i>Journal of Drug Delivery Science and Technology</i> . 2022 2022/04/01/;70:103162.                 | Title |
| 757 | Mohamed D, Kamal M. Enhanced HPLC-MS/MS method for the quantitative determination of the co-administered drugs ceftriaxone sodium and lidocaine hydrochloride in human plasma following an intramuscular injection and application to a pharmacokinetic study. <i>Biomed Chromatogr</i> . 2018 Oct;32(10):e4322. | Title |
| 758 | Nozawa T, Toyobuku H, Kobayashi D, et al. Enhanced intestinal absorption of drugs by activation of peptide transporter PEPT1 using proton-releasing polymer. <i>Journal of pharmaceutical sciences</i> . 2003;92(11):2208-2216.                                                                                  | Title |
| 759 | Yamamoto A, Morishita Y, Sugishita S, et al. Enhanced Permeability of Phenylalanyl-glycine (Phe-Gly) Across the Intestinal Membranes by Chemical Modification with Various Fatty Acids. <i>Drug Metabolism and Pharmacokinetics</i> . 2003 2003/01/01/;18(1):23-32.                                              | Title |
| 760 | Funaki T. Enterohepatic circulation model for population pharmacokinetic analysis. <i>Journal of pharmacy and pharmacology</i> . 1999;51(10):1143-1148.                                                                                                                                                          | Title |
| 761 | ENTIS 33rd conference abstracts 2022 September 8th-10th Bergamo, Italy. <i>Neurotoxicology and Teratology</i> . 2022 2022/07/01/;92:107108.                                                                                                                                                                      | Title |
| 762 | Xu D, Hu J, Pan X, et al. Enzyme-Powered Liquid Metal Nanobots Endowed with Multiple Biomedical Functions. <i>ACS Nano</i> . 2021 Jun 28.                                                                                                                                                                        | Title |
| 763 | Ball P. Epidemiology and Treatment of Chronic Bronchitis and Its Exacerbations. <i>Chest</i> . 1995 1995/08/01/;108(2, Supplement):43S-52S.                                                                                                                                                                      | Title |

|     |                                                                                                                                                                                                                                                                                           |          |
|-----|-------------------------------------------------------------------------------------------------------------------------------------------------------------------------------------------------------------------------------------------------------------------------------------------|----------|
| 764 | Bagnasco F, Piaggio G, Mesini A, et al. Epidemiology of Antibiotic Resistant Pathogens in Pediatric Urinary Tract Infections as a Tool to Develop a Prediction Model for Early Detection of Drug-Specific Resistance. <i>Antibiotics (Basel)</i> . 2022 May 26;11(6).                     | Title    |
| 765 | Hardy D, Barry A, Fuchs P, et al. Error rates in cefoperazone and cefoperazone-sulbactam disk tests with enterobacteriaceae and <i>Pseudomonas aeruginosa</i> . <i>European Journal of Clinical Microbiology and Infectious Diseases</i> . 1992;11(10):926-930.                           | Title    |
| 766 | Nanda R, Gaikwad J, Prakash A, et al. Estimation of Cefixime and Erdosteine in its Pharmaceutical Dosage Form by Spectrophotometric Method. <i>Asian Journal of Research in Chemistry</i> . 2009;2(4):404-406.                                                                            | Abstract |
| 767 | Kumar A, Kishore L, Nair A, et al. Estimation of cefixime and ofloxacin in its pharmaceutical dosage form by spectrophotometric methods. <i>Journal of Pharmacy Research</i> . 2011;4(6):1864-1866.                                                                                       | Abstract |
| 768 | El Hachlafi N, Chebat A, Fikri-Benbrahim K. Ethnopharmacology, Phytochemistry, and Pharmacological Properties of <i>Thymus satureioides</i> Coss. <i>Evidence-Based Complementary and Alternative Medicine</i> . 2021;2021.                                                               | Title    |
| 769 | Goldstein F, Bryskier A, Appelbaum PC, et al. The etiology of respiratory tract infections and the antibacterial activity of fluoroquinolones and other oral antibacterial agents against respiratory pathogens. <i>Clinical Microbiology and Infection</i> . 1998 1998/04/01;4:2S8-2S18. | Title    |
| 770 | Petitjean O, Brion N, Tod M, et al. Etude de l'interaction pharmacocinétique entre le céfixime et deux antiacides: résultats préliminaires. <i>La Presse médicale</i> (1983). 1989;18(32):1596-1598.                                                                                      | Title    |
| 771 | Amikacin O, Amikacin B, Cefdinir O, et al. Evaluating safety reporting in paediatric antibiotic trials 2000-2016: a systematic review and meta-analysis. <i>Adler</i> . 2000;2.                                                                                                           | Title    |

|     |                                                                                                                                                                                                                                                                                                                       |          |
|-----|-----------------------------------------------------------------------------------------------------------------------------------------------------------------------------------------------------------------------------------------------------------------------------------------------------------------------|----------|
| 772 | François P, Bensman A, Bégué P, et al. Evaluation de l'efficacité et du coût de deux stratégies thérapeutiques dans les pyélonéphrites de l'enfant : céfixime per os versus ceftriaxone parentérale en relais d'une bithérapie intraveineuse. <i>Médecine et Maladies Infectieuses</i> . 1997 1997/06/01/;27:667-673. | Title    |
| 773 | Hinderling PH. Evaluation of a novel method to estimate absolute bioavailability of drugs from oral data. <i>Biopharmaceutics &amp; drug disposition</i> . 2003;24(1):1-16.                                                                                                                                           | Title    |
| 774 | Ramdhani D, Kusuma SAF. EVALUATION OF CEFIXIME ANTIBIOTIC RESISTANCE: RELATION OF ANTIBIOTIC QUALITY PARAMETERS TO CASES OF RESISTANCE OCCURRING IN ARIS DISEASE IN TASIKMALAYA CITY HEALTH CENTER. 2017.                                                                                                             | Abstract |
| 775 | Westphal JF, Brogard JM, Jehl F, et al. Evaluation of cefixime biliary disposition in the isolated perfused rabbit liver model and in humans. <i>Drugs Exp Clin Res</i> . 1992;18(8):329-36.                                                                                                                          | Animal   |
| 776 | Gajul S, Mohite S, Kakade S, et al. Evaluation of Cefixime-Clavulanate Combination by Comparative Disk Diffusion Method in Klebsiella pneumoniae Clinical Isolates-An In-Vitro Study. <i>JOURNAL OF KRISHNA INSTITUTE OF MEDICAL SCIENCES UNIVERSITY</i> . 2015;4(2):38-45.                                           | Abstract |
| 777 | Murtaza G, Ahmad M, Khan SA, et al. Evaluation of cefixime-loaded chitosan microspheres: Analysis of dissolution data using DDSolver. <i>Dissolution Technologies</i> . 2012;19(2):13-19.                                                                                                                             | Abstract |
| 778 | Maheshwari ML, Ubed-ur-Rahman Mughal GK, Shaikh B, et al. Evaluation of Different Brands of Cefixime Available in Pakistan by Newly Developed Spectrophotometric Method. <i>Evaluation</i> . 2021;33(29A).                                                                                                            | Abstract |
| 779 | Ogden A, Kuhn M, Dority M, et al. Evaluation of pharmacokinetic/pharmacodynamic relationships of PD-0162819, a biotin carboxylase inhibitor representing a new class of antibacterial compounds, using in vitro infection models. <i>Antimicrobial agents and chemotherapy</i> . 2012;56(1):124-129.                  | Title    |

|     |                                                                                                                                                                                                                                                                                                                |          |
|-----|----------------------------------------------------------------------------------------------------------------------------------------------------------------------------------------------------------------------------------------------------------------------------------------------------------------|----------|
| 780 | Joshi AS, Shah RK, Suthar MH, et al. Evaluation of rationality of antimicrobial and antidiarrheal fixed dose combination available in Indian market. National Journal of Physiology, Pharmacy and Pharmacology. 2021;11(2):222-226.                                                                            | Title    |
| 781 | Davies HD, Low DE, Schwartz B, et al. Evaluation of short-course therapy with cefixime or rifampin for eradication of pharyngeally carried group A streptococci. The Ontario GAS Study Group. Clin Infect Dis. 1995 Nov;21(5):1294-9.                                                                          | Abstract |
| 782 | Quaye N, Cole MJ, Ison CA. Evaluation of the activity of ertapenem against gonococcal isolates exhibiting a range of susceptibilities to cefixime. Journal of Antimicrobial Chemotherapy. 2014;69(6):1568-1571.                                                                                                | Abstract |
| 783 | Low DE, Scriver SR. Evaluation of the in vitro activity of cefixime for its use in switch therapy. Current therapeutic research. 1994;55:35-41.                                                                                                                                                                | Abstract |
| 784 | Cormican MG, Jones RN. Evaluation of the in-vitro activity of furopenem (SY5555 or SUN5555) against respiratory tract pathogens and $\beta$ -lactamase producing bacteria. Journal of Antimicrobial Chemotherapy. 1995;35(4):535-539.                                                                          | Title    |
| 785 | Tsuji A, Hirooka H, Tamai I, et al. Evidence for a carrier-mediated transport system in the small intestine available for FK089, a new cephalosporin antibiotic without an amino group. The Journal of antibiotics. 1986;39(11):1592-1597.                                                                     | Title    |
| 786 | Thelen H, Dilworth TJ, Mercier R-C. Examining the Combination of Cefixime and Amoxicillin/Clavulanate against Extended-Spectrum Beta-Lactamase-Producing Escherichia coli Isolates. Chemotherapy. 2022.                                                                                                        | Abstract |
| 787 | Executive summary. Otolaryngology - Head and Neck Surgery. 2004 2004/01/01/;130(1, Supplement):1-45.                                                                                                                                                                                                           | Title    |
| 788 | de Cueto M, Aliaga L, Alós J-I, et al. Executive summary of the diagnosis and treatment of urinary tract infection: Guidelines of the Spanish Society of Clinical Microbiology and Infectious Diseases (SEIMC). Enfermedades infecciosas y microbiologia clinica (English ed). 2017 2017/05/01/;35(5):314-320. | Title    |

|     |                                                                                                                                                                                                                                                                   |          |
|-----|-------------------------------------------------------------------------------------------------------------------------------------------------------------------------------------------------------------------------------------------------------------------|----------|
| 789 | Nct. Expedited Partner Therapy and the HIV Prevention Cascade.<br><a href="https://clinicaltrials.gov/show/NCT04553211">https://clinicaltrials.gov/show/NCT04553211</a> . 2020.                                                                                   | Title    |
| 790 | Nct. Expedited Partner Therapy for MSM in Peru. <a href="https://clinicaltrials.gov/show/NCT01720654">https://clinicaltrials.gov/show/NCT01720654</a> . 2012.                                                                                                     | Title    |
| 791 | Basavaraj H, Mruthyunjayaswamy B. An Experimental Design Approach for Validation and Optimisation of Spectrophotometric Determination of Cefixime in Pharmaceutical Dosage Form. Indian Journal of Pharmaceutical Sciences. 2022;84(1):115-120.                   | Abstract |
| 792 | Magit AE, Dolitsky JN, Doyle WJ, et al. An experimental study of cefixime in the treatment of Streptococcus pneumoniae otitis media. International journal of pediatric otorhinolaryngology. 1994;29(1):1-9.                                                      | Abstract |
| 793 | Eriksen NL, Blanco JD. EXTENDED-SPECTRUM (SECOND-AND THIRD-GENERATION) CEPHALOSPORINS. Obstetrics and Gynecology Clinics of North America. 1992 1992/09/01;19(3):461-474.                                                                                         | Abstract |
| 794 | Sagar P, Srivastava M, Prakash R, et al. The fabrication of an MoS <sub>2</sub> QD–AuNP modified screen-printed electrode for the improved electrochemical detection of cefixime. Analytical Methods. 2020;12(23):3014-3024.                                      | Abstract |
| 795 | Balya H, Radhakrishnan A, Jabaris SL, et al. Fabrication of novel bio-compatible cefixime nanoparticles using chitosan and Azadirachta indica fruit mucilage as natural polymers. Journal of Drug Delivery Science and Technology. 2021;66:102750.                | Abstract |
| 796 | Hussain I, AL-Othman Z, Saleem K, et al. Fast Analysis of Third-Generation Cephalosporins in Human Plasma by SPE and HPLC Methods. 2011.                                                                                                                          | Abstract |
| 797 | Kawamoto H, Tabei Y, Kimura T, et al. Feasibility and pharmacokinetic study of potential ABCG2 inhibitor, gefitinib (GB), in combination with irinotecan (IRN) for adolescents and young adults (AYA). Journal of Clinical Oncology. 2011;29(15_suppl):9564-9564. | Title    |



|     |                                                                                                                                                                                                                                                                                        |          |
|-----|----------------------------------------------------------------------------------------------------------------------------------------------------------------------------------------------------------------------------------------------------------------------------------------|----------|
| 798 | Harrison RF, Ouyang H. Fever and the Rational Use of Antimicrobials in the Emergency Department. <i>Emergency Medicine Clinics of North America</i> . 2013 2013/11/01/;31(4):945-968.                                                                                                  | Title    |
| 799 | BA E, ÖZDEMİR S, ÇAĞLAYAN MG, et al. First derivative spectrophotometric determination of cefixime and cefdinir in pharmaceutical preparations. <i>Turk J Pharm Sci</i> . 2013;10(3):321-328.                                                                                          | Abstract |
| 800 | Liang J, Yang R, Li X, et al. First four failures of cefthiamidine to treat urogenital gonorrhoea in Guangzhou, China, 2014–15. <i>Sexual Health</i> . 2017;14(3):289-292.                                                                                                             | Title    |
| 801 | Adam D, Hostalek U, Troster K. Five day treatment of bacterial pharyngitis and tonsillitis with cefixime. comparison with a 10 day treatment with penicillin V. <i>Klinische padiatrie</i> . 1996;208(5):310-313.                                                                      | Abstract |
| 802 | Temocin F, Tülek NE, Hekimoğlu Ş, et al. Five-years tigecycline experience an analysis of real-life data. 2018.                                                                                                                                                                        | Title    |
| 803 | Wenzel U, Kuntz S, Daniel H. Flavonoids with epidermal growth factor-receptor tyrosine kinase inhibitory activity stimulate PEPT1-mediated cefixime uptake into human intestinal epithelial cells. <i>Journal of Pharmacology and Experimental Therapeutics</i> . 2001;299(1):351-357. | Abstract |
| 804 | Jayabalan N, Code Q. Fluindione and cefixime induced cutaneous bleeding manifestations–A case report and review of literature. <i>IJPR</i> . 2018;8(03).                                                                                                                               | Title    |
| 805 | Akhgari F, Samadi N, Farhadi K. Fluorescent carbon dot as nanosensor for sensitive and selective detection of cefixime based on inner filter effect. <i>Journal of fluorescence</i> . 2017;27(3):921-927.                                                                              | Abstract |
| 806 | Prince RA. Fluoroquinolone-drug interactions: An overview. <i>Antimicrobial Newsletter</i> . 1989 1989/12/01/;6(12):93-98.                                                                                                                                                             | Title    |
| 807 | Effa EE, Lassi ZS, Critchley JA, et al. Fluoroquinolones for treating typhoid and paratyphoid fever (enteric fever). <i>Cochrane Database of Systematic Reviews</i> . 2011 (10).                                                                                                       | Title    |
| 808 | Fluoroquinolones I. <i>Clinical Microbiology and Infection</i> . 1999 1999/03/01/;5:138-148.                                                                                                                                                                                           | Title    |

|     |                                                                                                                                                                                                      |          |
|-----|------------------------------------------------------------------------------------------------------------------------------------------------------------------------------------------------------|----------|
| 809 | Hooton TM, Garrison J. Fluoroquinolones in the treatment of acute uncomplicated urinary tract infections in adult women. Expert opinion on pharmacotherapy. 2001;2(8):1227-1237.                     | Title    |
| 810 | Jain S, Ancheriya R, Srivastva S, et al. Formulation and Characterization of Cefixime Phytosomes for Oral Drug Delivery. Asian Journal of Pharmaceutical Research and Development. 2019;7(5):65-73.  | Abstract |
| 811 | Singh A, Jha K, Singh PS, et al. Formulation and evaluation of cefixime floating beads. International Journal of Research in Pharmacy and Chemistry. 2011;1(4):922-924.                              | Abstract |
| 812 | AMIR YKA, ALSOUZ MA, SALIM A. FORMULATION AND EVALUATION OF CONTROLLED RELEASE CEFIXIME-CMC BIOPOLYMER USING ION CROSS LINKING TECHNIQUE.                                                            | Abstract |
| 813 | Arora K, Grover I, Chandna A, et al. Formulation and Evaluation of Fast Dissolving Tablets of Cefixime Trihydrate. Magnesium. 2015;6(6):6.                                                           | Abstract |
| 814 | Akelesh T, Johnson S, Chander JU, et al. Formulation and evaluation of floating tablets of cefixime trihydrate using chitosan. Research Journal of Pharmacy and Technology. 2015;8(11):1502.         | Abstract |
| 815 | Subhojit S. Formulation And Evaluation Of Floating Tablets Of Cefixime Trihydrate Using Chitosan: RVS College of Pharmaceutical Sciences, Coimbatore, Tamilnadu, India; 2012.                        | Abstract |
| 816 | Ganesan V, Allimalarkodi S. Formulation and in vitro evaluation cefixime lipospheres. World J Pharma Res. 2015;4(10):1266-80.                                                                        | Abstract |
| 817 | Paul Y, Kumar M, Singh B. Formulation and in Vitro evaluation of Gastroretentive drug delivery system of Cefixime Trihydrate. International Journal of Drug Development and Research. 2011;3(4):0-0. | Abstract |
| 818 | Vasam M, Ponugoti RSR. Formulation and pharmacokinetic (in-vitro and in-vivo) evaluation of cefixime microspheres. World Journal of Pharmacy and Pharmaceutical Sciences. 2017;6(7):1476-1488.       | Abstract |

|     |                                                                                                                                                                                                                                                    |          |
|-----|----------------------------------------------------------------------------------------------------------------------------------------------------------------------------------------------------------------------------------------------------|----------|
| 819 | Kamran M, Khan MA, Shafique M, et al. Formulation Design, Characterization and In-Vivo Assessment of Cefixime Loaded Binary Solid Lipid Nanoparticles to Enhance Oral Bioavailability. Journal of Biomedical Nanotechnology. 2022;18(4):1215-1226. | Abstract |
| 820 | Karthikeyan A. FORMULATION DEVELOPMENT AND EVALUATION OF CEFIXIME DISPERSIBLE TABLETS. Evaluation.6(3.0):0.1500.                                                                                                                                   | Abstract |
| 821 | Natarajan R, Rajendran N, Priya MR. Formulation development and invitro evaluation of cefixime trihydrate Loaded chitosan–alginate transdermal patches. Int J RRPAS. 2011;4:240-254.                                                               | Abstract |
| 822 | Madhu S. Formulation Development and Invitro Evaluation of Sustained Release Oral Dosage Forms Containing Cefixime: JKK Nattraja College of Pharmacy, Kumarapalayam; 2016.                                                                         | Abstract |
| 823 | Razdan K, Sahajpal NS, Singh K, et al. Formulation of sustained-release microspheres of cefixime with enhanced oral bioavailability and antibacterial potential. Therapeutic Delivery. 2019;10(12):769-782.                                        | Abstract |
| 824 | Devi YM, Basha VS, Sailaja G. Formulation, Characterization and Comparison of Cefixime, Cefaclor and Cefdinir Microspheres.                                                                                                                        | Abstract |
| 825 | SHETTY A, SELVAM P, SHETTY S, et al. Formulation, optimization and evaluation of mucoadhesive microspheres of captopril. Journal of Research in Pharmacy. 2019;23(5).                                                                              | Title    |
| 826 | Kwan ACF, Beahm NP. Fosfomycin for bacterial prostatitis: a review. International Journal of Antimicrobial Agents. 2020 2020/10/01/;56(4):106106.                                                                                                  | Title    |
| 827 | Livermore DM. Fourteen years in resistance. International Journal of Antimicrobial Agents. 2012 2012/04/01/;39(4):283-294.                                                                                                                         | Title    |
| 828 | Pedretti A, De Luca L, Marconi C, et al. Fragmental modeling of hPepT2 and analysis of its binding features by docking studies and pharmacophore mapping. Bioorganic & Medicinal Chemistry. 2011 2011/08/01/;19(15):4544-4551.                     | Title    |

|     |                                                                                                                                                                                                                                                                                |          |
|-----|--------------------------------------------------------------------------------------------------------------------------------------------------------------------------------------------------------------------------------------------------------------------------------|----------|
| 829 | Free oral communications. Journal of the European Academy of Dermatology and Venereology. 1995<br>1995/10/01/;5:S71-S122.                                                                                                                                                      | Title    |
| 830 | Al-Hakkani MF, Gouda GA, Hassan SH, et al. Fully investigation of RP-HPLC analytical method validation parameters for determination of Cefixime traces in the different pharmaceutical dosage forms and urine analysis. Acta Pharmaceutica Scientia. 2021;59(1).               | Abstract |
| 831 | Tamai I, Tomizawa N, Kadowiki A, et al. Functional expression of intestinal dipeptide/ $\beta$ -lactam antibiotic transporter in <i>Xenopus laevis</i> oocytes. Biochemical Pharmacology. 1994 1994/08/30/;48(5):881-888.                                                      | Title    |
| 832 | Tamai I, Tomizawa N, Takeuchi T, et al. Functional expression of transporter for beta-lactam antibiotics and dipeptides in <i>Xenopus laevis</i> oocytes injected with messenger RNA from human, rat and rabbit small intestines. J Pharmacol Exp Ther. 1995 Apr;273(1):26-31. | Animal   |
| 833 | Sunakawa K, Saito N, Ishizuka Y, et al. Fundamental and clinical studies of cefixime granules in pediatrics. The Japanese Journal of Antibiotics. 1986;39(4):1035-1054.                                                                                                        | Abstract |
| 834 | Nakayama N, Yanagishima M, Tsuji Y. Fundamental and clinical studies of cefixime in children. The Japanese Journal of Antibiotics. 1986;39(4):1202-1213.                                                                                                                       | Abstract |
| 835 | Toyonaga Y, Sugita M, Nakamura H, et al. Fundamental and clinical studies on cefixime (5% granules) in the pediatric field. The Japanese Journal of Antibiotics. 1986;39(4):1055-1075.                                                                                         | Abstract |
| 836 | Miyazaki M, Kida K, Matsuda H, et al. Fundamental and clinical studies on cefixime in pediatric field. The Japanese Journal of Antibiotics. 1986;39(4):1166-1175.                                                                                                              | Abstract |
| 837 | Iwai N, Shibata M, Mizoguchi F, et al. Fundamental and clinical studies on cefixime in pediatrics. The Japanese Journal of Antibiotics. 1986;39(4):1087-1105.                                                                                                                  | Abstract |
| 838 | Kurashige T, Morita H, Araki K, et al. Fundamental and clinical studies on cefixime in pediatrics. The Japanese Journal of Antibiotics. 1986;39(4):1157-1165.                                                                                                                  | Abstract |

|     |                                                                                                                                                                                                                                                                              |          |
|-----|------------------------------------------------------------------------------------------------------------------------------------------------------------------------------------------------------------------------------------------------------------------------------|----------|
| 839 | Nakashima S, Hayakawa F, Nakashima T, et al. Fundamental and clinical studies on cefixime in the pediatric field. The Japanese journal of antibiotics. 1986;39(4):1076-1086.                                                                                                 | Abstract |
| 840 | THEK CP. Future meeting dates and sites of the American Society for Clinical Pharmacology and Therapeutics. Clin Pharmacokinet. 1988;15:326-54.                                                                                                                              | Title    |
| 841 | Mahadevan U. Gastrointestinal medications in pregnancy. Best Practice & Research Clinical Gastroenterology. 2007 2007/10/01/;21(5):849-877.                                                                                                                                  | Title    |
| 842 | Gillespie WR. Generalized pharmacokinetic modeling for drugs with nonlinear binding: I. Theoretical framework. Journal of pharmacokinetics and biopharmaceutics. 1993;21(1):99-124.                                                                                          | Title    |
| 843 | Barbee LA, Soge OO, Morgan J, et al. Gentamicin alone is inadequate to eradicate Neisseria gonorrhoeae from the pharynx. Clinical infectious diseases. 2020;71(8):1877-1882.                                                                                                 | Title    |
| 844 | Enikeev D, Spivak L. Gestational pyelonephritis: modern diagnostic and treatment. Consilium Medicum. 2016;18(7):49-54.                                                                                                                                                       | Title    |
| 845 | Imran M, Shah MR, Ullah F, et al. Glycoside-based niosomal nanocarrier for enhanced in-vivo performance of Cefixime. International Journal of Pharmaceutics. 2016 2016/05/30/;505(1):122-132.                                                                                | Abstract |
| 846 | Afkhami A, Soltani-Felehgari F, Madrakian T. Gold nanoparticles modified carbon paste electrode as an efficient electrochemical sensor for rapid and sensitive determination of cefixime in urine and pharmaceutical samples. Electrochimica acta. 2013;103:125-133.         | Abstract |
| 847 | Irimie M. Gonoreea–o boală netratabilă în viitor? 2017.                                                                                                                                                                                                                      | Title    |
| 848 | Singh AE, Gratrix J, Martin I, et al. Gonorrhoea treatment failures with oral and injectable expanded spectrum cephalosporin monotherapy vs dual therapy at 4 Canadian sexually transmitted infection clinics, 2010–2013. Sexually transmitted diseases. 2015;42(6):331-336. | Title    |

|     |                                                                                                                                                                                                                                                                                                             |          |
|-----|-------------------------------------------------------------------------------------------------------------------------------------------------------------------------------------------------------------------------------------------------------------------------------------------------------------|----------|
| 849 | Skerlev M, Čulav-Košćak I. Gonorrhea: New challenges. Clinics in Dermatology. 2014<br>2014/03/01/;32(2):275-281.                                                                                                                                                                                            | Title    |
| 850 | Graphical Abstract TOC. Journal of Drug Delivery Science and Technology. 2021 2021/12/01/;66:103011.                                                                                                                                                                                                        | Title    |
| 851 | Wagstaff AJ, Balfour JA. Grepafloxacin. Drugs. 1997;53(5):817-824.                                                                                                                                                                                                                                          | Title    |
| 852 | Mroczkowski T, Hook Iii E, Jones R, et al. Grepafloxacin versus cefixime as single-dose therapy for uncomplicated gonorrhea in women. Infectious diseases in obstetrics and gynecology. 1997;5(6):370-375.                                                                                                  | Abstract |
| 853 | Vogel F. A guide to the treatment of lower respiratory tract infections. Drugs. 1995;50(1):62-72.                                                                                                                                                                                                           | Title    |
| 854 | Pong AL, Bradley JS. Guidelines for the Selection of Antibacterial Therapy in Children. Pediatric Clinics of North America. 2005 2005/06/01/;52(3):869-894.                                                                                                                                                 | Title    |
| 855 | Williams PC, Berkley JA. Guidelines for the treatment of dysentery (shigellosis): a systematic review of the evidence. Paediatrics and international child health. 2018;38(sup1):S50-S65.                                                                                                                   | Title    |
| 856 | Sugawara M, Iseki K, Miyazaki K. H <sup>+</sup> coupled transport of orally active cephalosporins lacking an alpha-amino group across brush-border membrane vesicles from rat small intestine. J Pharm Pharmacol. 1991 Jun;43(6):433-5.                                                                     | Animal   |
| 857 | Inui K, Okano T, Maegawa H, et al. H <sup>+</sup> coupled transport of p.o. cephalosporins via dipeptide carriers in rabbit intestinal brush-border membranes: difference of transport characteristics between cefixime and cephradine. J Pharmacol Exp Ther. 1988 Oct;247(1):235-41.                       | Animal   |
| 858 | Jones RN, Erwin ME. Haemophilus test medium interpretive criteria for disk diffusion susceptibility tests with cefdinir, cefetamet, cefmetazole, cefpodoxime, cefdaloxime (RU29246, HR-916 metabolite), and trospectomycin. Diagnostic Microbiology and Infectious Disease. 1992 1992/11/01/;15(8):693-701. | Title    |

|     |                                                                                                                                                                                                                                                                                                                              |        |
|-----|------------------------------------------------------------------------------------------------------------------------------------------------------------------------------------------------------------------------------------------------------------------------------------------------------------------------------|--------|
| 859 | Loo V, Sherman P, Matlow A. Helicobacter pylori infection in a pediatric population: in vitro susceptibilities to omeprazole and eight antimicrobial agents. Antimicrobial agents and chemotherapy. 1992;36(5):1133-1135.                                                                                                    | Title  |
| 860 | Kimoto E, Bi Y-A, Kosa RE, et al. Hepatobiliary Clearance Prediction: Species Scaling From Monkey, Dog, and Rat, and In Vitro–In Vivo Extrapolation of Sandwich-Cultured Human Hepatocytes Using 17 Drugs. Journal of Pharmaceutical Sciences. 2017 2017/09/01/;106(9):2795-2804.                                            | Animal |
| 861 | Tarirai C, Viljoen AM, Hamman JH. Herb–drug pharmacokinetic interactions reviewed. Expert opinion on drug metabolism & toxicology. 2010;6(12):1515-1538.                                                                                                                                                                     | Title  |
| 862 | Colalto C. Herbal interactions on absorption of drugs: Mechanisms of action and clinical risk assessment. Pharmacological Research. 2010 2010/09/01/;62(3):207-227.                                                                                                                                                          | Title  |
| 863 | Jacobsson S, Mason C, Khan N, et al. High in vitro activity of DIS-73285, a novel antimicrobial with a new mechanism of action, against MDR and XDR Neisseria gonorrhoeae. Journal of Antimicrobial Chemotherapy. 2020;75(11):3244-3247.                                                                                     | Title  |
| 864 | Jacobsson S, Golparian D, Alm RA, et al. High in vitro activity of the novel spiropyrimidinetrione AZD0914, a DNA gyrase inhibitor, against multidrug-resistant Neisseria gonorrhoeae isolates suggests a new effective option for oral treatment of gonorrhea. Antimicrobial agents and chemotherapy. 2014;58(9):5585-5588. | Title  |
| 865 | Unemo M, Ringlander J, Wiggins C, et al. High in vitro susceptibility to the novel spiropyrimidinetrione ETX0914 (AZD0914) among 873 contemporary clinical Neisseria gonorrhoeae isolates from 21 European countries from 2012 to 2014. Antimicrobial agents and chemotherapy. 2015;59(9):5220-5225.                         | Title  |
| 866 | Yoo B-I, Yeom ZH, Kang MH, et al. High performance liquid chromatographic analysis and pharmacokinetic characteristics of ID-7181, a novel quaternary ammoniopropenyl cephalosporin, following intravenous and intramuscular injections to rats. Arzneimittelforschung. 2005;55(09):549-556.                                 | Animal |

|     |                                                                                                                                                                                                                                                                                                                                                                                                   |          |
|-----|---------------------------------------------------------------------------------------------------------------------------------------------------------------------------------------------------------------------------------------------------------------------------------------------------------------------------------------------------------------------------------------------------|----------|
| 867 | Danafar H. High performance liquid chromatographic method for determination of ezetimibe in pharmaceutical formulation tablets. <i>Pharmaceutical and Biomedical Research</i> . 2016;2(3):38-46.                                                                                                                                                                                                  | Title    |
| 868 | Unemo M, Ahlstrand J, Sánchez-Busó L, et al. High susceptibility to zoliflodacin and conserved target (GyrB) for zoliflodacin among 1209 consecutive clinical <i>Neisseria gonorrhoeae</i> isolates from 25 European countries, 2018. <i>Journal of Antimicrobial Chemotherapy</i> . 2021;76(5):1221-1228.                                                                                        | Title    |
| 869 | Kushner BH, Kramer K, Modak S, et al. High-dose cyclophosphamide–irinotecan–vincristine for primary refractory neuroblastoma. <i>European Journal of Cancer</i> . 2011 2011/01/01/;47(1):84-89.                                                                                                                                                                                                   | Title    |
| 870 | Allen SJ, Wareham K, Wang D, et al. A high-dose preparation of lactobacilli and bifidobacteria in the prevention of antibiotic-associated and <i>clostridium difficile</i> diarrhoea in older people admitted to hospital: a multicentre, randomised, double-blind, placebo-controlled, parallel arm trial (PLACIDE) [Journal: Article]. <i>Health technology assessment</i> . 2013;17(57):1-139. | Title    |
| 871 | Unemo M, Golparian D, Nicholas R, et al. High-level cefixime-and ceftriaxone-resistant <i>Neisseria gonorrhoeae</i> in France: novel penA mosaic allele in a successful international clone causes treatment failure. <i>Antimicrobial agents and chemotherapy</i> . 2012;56(3):1273-1280.                                                                                                        | Abstract |
| 872 | Elkhaïli H, Linger L, Monteil H, et al. High-performance liquid chromatographic assay for cefepime in serum. <i>Journal of Chromatography B: Biomedical Sciences and Applications</i> . 1997 1997/03/07/;690(1):181-188.                                                                                                                                                                          | Title    |
| 873 | Elkhaïli H, Niedergang S, Pompei D, et al. High-performance liquid chromatographic assay for meropenem in serum. <i>Journal of Chromatography B: Biomedical Sciences and Applications</i> . 1996 1996/11/08/;686(1):19-26.                                                                                                                                                                        | Title    |



|     |                                                                                                                                                                                                                                                       |          |
|-----|-------------------------------------------------------------------------------------------------------------------------------------------------------------------------------------------------------------------------------------------------------|----------|
| 874 | Amini H, Ahmadiani A. High-performance liquid chromatographic determination of rivastigmine in human plasma for application in pharmacokinetic studies. Iranian Journal of Pharmaceutical Research: IJPR. 2010;9(2):115.                              | Title    |
| 875 | Zendelovska D, Stafilov T, Miloševski P. High-performance liquid chromatographic method for simultaneous determination of cefixime and cefotaxime in plasma samples. Bulletin of the Chemists and Technologists of Macedonia, 22, 39–45 (2003). 2003. | Abstract |
| 876 | Jehl F, Gallion C, Monteil H. High-performance liquid chromatography of antibiotics. Journal of Chromatography B: Biomedical Sciences and Applications. 1990 1990/10/12/;531:509-548.                                                                 | Title    |
| 877 | Sader HS, Jones RN. Historical overview of the cephalosporin spectrum: Four generations of structural evolution. Antimicrobial Newsletter. 1992 1992/12/01/;8(12):75-82.                                                                              | Abstract |
| 878 | Kumazawa J, Yagisawa M. The history of antibiotics: The Japanese story. Journal of Infection and Chemotherapy. 2002 2002/01/01/;8(2):125-133.                                                                                                         | Title    |
| 879 | Complete Natal D. home> pill identifier and drug identification.                                                                                                                                                                                      | Title    |
| 880 | Jacobs MR. How can we predict bacterial eradication? Int J Infect Dis. 2003 Mar;7 Suppl 1:S13-20.                                                                                                                                                     | Title    |
| 881 | Carbon C. How to evaluate the ecologic impact of antibiotics in phase III trials. Clinical Microbiology and Infection. 2001 2001/01/01/;7:42-45.                                                                                                      | Title    |
| 882 | Kahsay G, Song H, Van Schepdael A, et al. Hydrophilic interaction chromatography (HILIC) in the analysis of antibiotics. Journal of Pharmaceutical and Biomedical Analysis. 2014 2014/01/18/;87:142-154.                                              | Title    |
| 883 | ICW – 2021 Virtual Workshop of the International Complement Society (ICS) – Abstracts; December 07 – 10, 2021. Molecular Immunology. 2022 2022/01/01/;141:116-235.                                                                                    | Title    |

|     |                                                                                                                                                                                                                                                                                                                                      |          |
|-----|--------------------------------------------------------------------------------------------------------------------------------------------------------------------------------------------------------------------------------------------------------------------------------------------------------------------------------------|----------|
| 884 | Jain N, Sk MF, Mishra A, et al. Identification of novel efflux pump inhibitors for <i>Neisseria gonorrhoeae</i> via multiple ligand-based pharmacophores, e-pharmacophore, molecular docking, density functional theory, and molecular dynamics approaches. <i>Computational Biology and Chemistry</i> . 2022 2022/06/01/;98:107682. | Title    |
| 885 | Pradnyadhita II. IDENTIFIKASI DAN UJI SENSITIVITAS BAKTERI <i>Neisseria gonorrhoeae</i> TERHADAP ANTIBIOTIK SEFIKSIM PADA PEKERJA SEKS KOMERSIAL DI PUSKESMAS II DENPASAR SELATAN: JURUSAN ANALIS KESEHATAN; 2018.                                                                                                                   | Title    |
| 886 | Patel U, Joshi AS, Ganjiwale J, et al. Impact of antimicrobial stewardship program on prescribing pattern of cephalosporins in the department of surgery. <i>National Journal of Physiology, Pharmacy and Pharmacology</i> . 2020;10(2):109-115.                                                                                     | Abstract |
| 887 | Khan A. Impact Of Omeprazole, Rosuvastatin And Clopidogrel On The Pharmacokinetics Of Cefixime In Healthy Adult Human Subjects: UNIVERSITY OF PESHAWAR; 2012.                                                                                                                                                                        | Title    |
| 888 | Faure S, Perrin-Guyomard A, Delmas JM, et al. Impact of therapeutic treatment with beta-lactam on transfer of the bla(CTX-M-9) resistance gene from <i>Salmonella enterica</i> serovar Virchow to <i>Escherichia coli</i> in gnotobiotic rats. <i>Appl Environ Microbiol</i> . 2009 Sep;75(17):5523-8.                               | Title    |
| 889 | Tsuji A. Impact of transporter-mediated drug absorption, distribution, elimination and drug interactions in antimicrobial chemotherapy. <i>Journal of Infection and Chemotherapy</i> . 2006 2006/01/01/;12(5):241-250.                                                                                                               | Title    |
| 890 | Ramirez-Malule H, Junne S, López C, et al. An improved HPLC-DAD method for clavulanic acid quantification in fermentation broths of <i>Streptomyces clavuligerus</i> . <i>Journal of Pharmaceutical and Biomedical Analysis</i> . 2016 2016/02/20/;120:241-247.                                                                      | Title    |
| 891 | Yu S, Zhang Y, Wang XZ. Improved understanding of cefixime trihydrate reactive crystallization and process scale-up with the aid of PAT. <i>Organic Process Research &amp; Development</i> . 2019;23(2):177-188.                                                                                                                     | Abstract |

|     |                                                                                                                                                                                                                                                                                                                                                                    |          |
|-----|--------------------------------------------------------------------------------------------------------------------------------------------------------------------------------------------------------------------------------------------------------------------------------------------------------------------------------------------------------------------|----------|
| 892 | Velický M, Tam KY, Dryfe RAW. In situ artificial membrane permeation assay under hydrodynamic control: Correlation between drug in vitro permeability and fraction absorbed in humans. <i>European Journal of Pharmaceutical Sciences</i> . 2011 2011/10/09/;44(3):299-309.                                                                                        | Title    |
| 893 | Mustafa G. IN TREATMENT oF ENTERic FeveR IN. <i>Mental</i> .2:1.                                                                                                                                                                                                                                                                                                   | Title    |
| 894 | Thakur N, Thakral S, Goswami M, et al. In vitro Absorption Study of Carbamazepine Solid Dispersion Using Everted Gut Sac Method. <i>Indonesian Journal of Pharmacy</i> . 2013;24(2):93-99.                                                                                                                                                                         | Title    |
| 895 | Garcia-Rodriguez J, García Sánchez J, García García M, et al. In vitro activities of new oral beta-lactams and macrolides against <i>Campylobacter pylori</i> . <i>Antimicrobial agents and chemotherapy</i> . 1989;33(9):1650-1651.                                                                                                                               | Title    |
| 896 | Jacobsson S, Golparian D, Phan LT, et al. In vitro activities of the novel bicyclics modithromycin (EDP-420, EP-013420, S-013420) and EDP-322 against MDR clinical <i>Neisseria gonorrhoeae</i> isolates and international reference strains. <i>Journal of Antimicrobial Chemotherapy</i> . 2015;70(1):173-177.                                                   | Title    |
| 897 | Grimm H. In vitro activity and cross resistance studies with cefpodoxime. <i>Zentralblatt für Bakteriologie</i> . 1991;276(1):54-62.                                                                                                                                                                                                                               | Title    |
| 898 | Stefani S, Pellegrino M, Privitera A, et al. In vitro activity of a new broad-spectrum, beta-lactamase-stable oral cephalosporin, cefixime, in comparison with other drugs, against <i>Haemophilus influenzae</i> , <i>Haemophilus parainfluenzae</i> , <i>Moraxella catarrhalis</i> and <i>Streptococcus pneumoniae</i> . <i>Chemotherapy</i> . 1992;38(1):36-45. | Abstract |
| 899 | Chin N, Neu HC. In vitro activity of an oral iminomethoxy aminothiazolyl cephalosporin, R-3746. <i>Antimicrobial agents and chemotherapy</i> . 1988;32(5):671-677.                                                                                                                                                                                                 | Title    |
| 900 | Rizwan M, Bakht J, Bacha N, et al. In vitro activity of antimicrobial agents against <i>Streptococcus pyogenes</i> isolated from different regions of Khyber Pakhtun Khwa Pakistan. <i>Pakistan journal of pharmaceutical sciences</i> . 2016;29(1).                                                                                                               | Title    |

|     |                                                                                                                                                                                                                                                                        |          |
|-----|------------------------------------------------------------------------------------------------------------------------------------------------------------------------------------------------------------------------------------------------------------------------|----------|
| 901 | Sultan T, Baltch AL, Smith RP, et al. In vitro activity of cefdinir (FK482) and ten other antibiotics against gram-positive and gram-negative bacteria isolated from adult and pediatric patients. <i>Chemotherapy</i> . 1994;40(2):80-91.                             | Title    |
| 902 | Mulligan ME, Kwok Y. In vitro activity of cefixime and six other agents against nosocomial pathogens of the Enterobacteriaceae family. <i>Infection Control &amp; Hospital Epidemiology</i> . 1987;8(6):241-244.                                                       | Abstract |
| 903 | Sader HS, Jones RN, Washington JA, et al. In vitro activity of cefpodoxime compared with other oral cephalosporins tested against 5556 recent clinical isolates from five medical centers. <i>Diagnostic microbiology and infectious disease</i> . 1993;17(2):143-150. | Abstract |
| 904 | Sen B, Bhattacharya M, Niyogi SK. In vitro activity of cefpodoxime, a third generation cephalosporin against <i>Salmonella enterica</i> serotype Typhi. <i>Antimicrobial Agents and Chemotherapy</i> . 2007.                                                           | Title    |
| 905 | Sen B, Bhattacharya M, Niyogi SK. In vitro activity of cefpodoxime, an expanded-spectrum cephalosporin, against <i>Salmonella enterica</i> serotype typhi. <i>Antimicrobial agents and chemotherapy</i> . 2008;52(2):802-803.                                          | Title    |
| 906 | Bowie W, Shaw C, Chan D, et al. In vitro activity of difloxacin hydrochloride (A-56619), A-56620, and cefixime (CL 284,635; FK 027) against selected genital pathogens. <i>Antimicrobial agents and chemotherapy</i> . 1986;30(4):590-593.                             | Abstract |
| 907 | Hunfeld K-P, Rödel R, Wichelhaus TA. In vitro activity of eight oral cephalosporins against <i>Borrelia burgdorferi</i> . <i>International Journal of Antimicrobial Agents</i> . 2003 2003/04/01/;21(4):313-318.                                                       | Abstract |
| 908 | García-Rodríguez J, Martín IT, Baquero F, et al. In vitro activity of fosfomicin trometamol against pathogens from urinary tract infections: a Spanish multicenter study. <i>Journal of chemotherapy</i> . 1997;9(6):394-402.                                          | Title    |
| 909 | Doern G. In vitro activity of loracarbef and effects of susceptibility test methods. <i>Am J Med</i> . 1992 Jun 22;92(6a):7s-15s.                                                                                                                                      | Title    |

|     |                                                                                                                                                                                                                                                                                                                                                                                             |          |
|-----|---------------------------------------------------------------------------------------------------------------------------------------------------------------------------------------------------------------------------------------------------------------------------------------------------------------------------------------------------------------------------------------------|----------|
| 910 | Pistiki A, Tsaganos T, Galani I, et al. In vitro activity of oral cephalosporins (cefprozil and cefixime) against ciprofloxacin-resistant Enterobacteriaceae from community-acquired urinary-tract infections. Infectious diseases and therapy. 2015;4(4):425-432.                                                                                                                          | Abstract |
| 911 | Jones RN, Erwin ME, Barrett MS, et al. In vitro activity of RU29246 the metabolite of a new HR916 cephalosporin ester. Diagnostic Microbiology and Infectious Disease. 1991 1991/11/01/;14(6):473-483.                                                                                                                                                                                      | Title    |
| 912 | Golparian D, Fernandes P, Ohnishi M, et al. In vitro activity of the new fluoroketolide solithromycin (CEM-101) against a large collection of clinical Neisseria gonorrhoeae isolates and international reference strains, including those with high-level antimicrobial resistance: potential treatment option for gonorrhea? Antimicrobial agents and chemotherapy. 2012;56(5):2739-2742. | Title    |
| 913 | Jacobsson S, Mason C, Khan N, et al. In vitro activity of the novel oral antimicrobial SMT-571, with a new mechanism of action, against MDR and XDR Neisseria gonorrhoeae: future treatment option for gonorrhoea? Journal of Antimicrobial Chemotherapy. 2019;74(6):1591-1594.                                                                                                             | Title    |
| 914 | Jacobsson S, Paukner S, Golparian D, et al. In vitro activity of the novel pleuromutilin lefamulin (BC-3781) and effect of efflux pump inactivation on multidrug-resistant and extensively drug-resistant Neisseria gonorrhoeae. Antimicrobial agents and chemotherapy. 2017;61(11):e01497-17.                                                                                              | Title    |
| 915 | Fietta A, Merlini C, Grassi G. In vitro activity of two new oral cephalosporins, cefixime and cefdinir (CI 983), on human peripheral mononuclear and polymorphonuclear leukocyte functions. Chemotherapy. 1994;40(5):317-323.                                                                                                                                                               | Abstract |
| 916 | Tamura A, Okamoto R, Yoshida T, et al. In vitro and in vivo antibacterial activities of ME1207, a new oral cephalosporin. Antimicrob Agents Chemother. 1988 Sep;32(9):1421-6.                                                                                                                                                                                                               | Title    |

|     |                                                                                                                                                                                                                                                   |          |
|-----|---------------------------------------------------------------------------------------------------------------------------------------------------------------------------------------------------------------------------------------------------|----------|
| 917 | Mirghani M, Mohamed EA, Ahmed SI, et al. IN VITRO ANTI-BACTERIAL ACTIVITY OF ETHANOL EXTRACT OF ZINGIBER OFFICINALE (ZINGIBERACEAE) COMBINED WITH AMOXYCILLIN AND CEFIXIME. 2018.                                                                 | Abstract |
| 918 | Komolpis P. In Vitro Anti-Staphylococcal Activity of Cefdinir.                                                                                                                                                                                    | Title    |
| 919 | Cheng L-Y, Xia W, Zhang X, et al. In vitro binding comparison of cephalosporins to human serum albumin by spectroscopy and molecular docking approaches: A novel structural pursuing. Journal of Molecular Liquids. 2017 2017/12/01/;248:168-176. | Abstract |
| 920 | AM THABIT A, AL-GHANI AM. IN VITRO CEFIXIME DISSOLUTION IN PHARMACOPEIA-RECOMMENDED MEDIUM AND SIMULATED GASTROINTESTINAL FLUIDS: A COMPARATIVE STUDY. IN VITRO. 2019;12(12).                                                                     | Abstract |
| 921 | Felmingham D, Robbins MJ, Ghosh G, et al. An in vitro characterization of cefditoren, a new oral cephalosporin. Drugs Exp Clin Res. 1994;20(4):127-47.                                                                                            | Title    |
| 922 | Rolin O, Roche G, Bouanchaud D. In vitro comparative bactericidal effect of cefotaxime and cefixime in a kinetic model. Presse Medicale (Paris, France: 1983). 1989;18(32):1569-1571.                                                             | Abstract |
| 923 | Westermeyer RR, Roy AF, Mitchell MS, et al. In vitro comparison of Staphylococcus pseudintermedius susceptibility to common cephalosporins used in dogs. Vet Ther. 2010;11(3):1-9.                                                                | Animal   |
| 924 | Bakthavatchalam Y, Kumar D, Tayubi I, et al. In vitro efficacy and in silico analysis of cefixime–ofloxacin combination for Salmonella Typhi from bloodstream infection. Journal of Applied Microbiology. 2017;123(3):615-624.                    | Abstract |
| 925 | Allen GP, Deao KM, Hill SA, et al. In vitro evaluation of antimicrobial resistance selection in Neisseria gonorrhoeae. International Journal of Antimicrobial Agents. 2021;58(4):106417.                                                          | Title    |

|     |                                                                                                                                                                                                                                                                                                                                           |          |
|-----|-------------------------------------------------------------------------------------------------------------------------------------------------------------------------------------------------------------------------------------------------------------------------------------------------------------------------------------------|----------|
| 926 | Fuchs PC, Jones RN, Barry AL, et al. In vitro evaluation of cefixime (FK027, FR17027, CL284635): Spectrum against recent clinical isolates, comparative antimicrobial activity, $\beta$ -lactamase stability, and preliminary susceptibility testing criteria. <i>Diagnostic microbiology and infectious disease</i> . 1986;5(2):151-162. | Abstract |
| 927 | Chiu C-H, Lin T-Y, Ou JT. In vitro evaluation of intracellular activity of antibiotics against non-typhoid Salmonella. <i>International Journal of Antimicrobial Agents</i> . 1999 1999/06/01/;12(1):47-52.                                                                                                                               | Title    |
| 928 | Jones RN, Barry AL. In vitro evaluations of U-76,252 (CS-807): antimicrobial spectrum, beta-lactamase stability, and enzyme inhibition. <i>Diagnostic microbiology and infectious disease</i> . 1987;8(4):245-249.                                                                                                                        | Title    |
| 929 | Patil SV, Hajare AL, Patankar M, et al. In vitro fractional inhibitory concentration (FIC) study of cefixime and azithromycin fixed dose combination (FDC) against respiratory clinical isolates. <i>Journal of Clinical and Diagnostic Research: JCDR</i> . 2015;9(2):DC13.                                                              | Abstract |
| 930 | Istifli ES, Topaktaş M. In vitro genotoxicity and cytotoxicity of a particular combination of pemetrexed and cefixime in human peripheral blood lymphocytes. <i>SpringerPlus</i> . 2015;4(1):1-9.                                                                                                                                         | Abstract |
| 931 | De Vecchi E, Nicola L, Zucchetti E, et al. In vitro induction of resistance by tissue concentrations of azithromycin, clarithromycin, cefixime and amoxicillin/clavulanate in clinical isolates of <i>Streptococcus pyogenes</i> . <i>Journal of chemotherapy</i> . 2006;18(4):379-388.                                                   | Abstract |
| 932 | Bingen E, Bidet P, Birgy A, et al. In vitro interaction between cefixime and amoxicillin-clavulanate against extended-spectrum-beta-lactamase-producing <i>Escherichia coli</i> causing urinary tract infection. <i>Journal of clinical microbiology</i> . 2012;50(7):2540-2541.                                                          | Abstract |
| 933 | Gil-Alonso S, Jauregizar N, Ortega I, et al. In vitro pharmacodynamic modelling of anidulafungin against <i>Candida</i> spp. <i>International Journal of Antimicrobial Agents</i> . 2016 2016/03/01/;47(3):178-183.                                                                                                                       | Title    |

|     |                                                                                                                                                                                                                                                                                                                                                                                 |          |
|-----|---------------------------------------------------------------------------------------------------------------------------------------------------------------------------------------------------------------------------------------------------------------------------------------------------------------------------------------------------------------------------------|----------|
| 934 | Bialer M, Wu WH, Faulkner RD, et al. In vitro protein binding interaction studies involving cefixime. <i>Biopharm Drug Dispos.</i> 1988 May-Jun;9(3):315-20.                                                                                                                                                                                                                    | Abstract |
| 935 | Negri MC, Morosini MI, Loza E, et al. In vitro selective antibiotic concentrations of beta-lactams for penicillin-resistant <i>Streptococcus pneumoniae</i> populations. <i>Antimicrobial Agents and Chemotherapy.</i> 1994;38(1):122-125.                                                                                                                                      | Title    |
| 936 | Spangler SK, Jacobs MR, Appelbaum PC. In vitro susceptibilities of 185 penicillin-susceptible and-resistant pneumococci to WY-49605 (SUN/SY 5555), a new oral penem, compared with those to penicillin G, amoxicillin, amoxicillin-clavulanate, cefixime, cefaclor, cefpodoxime, cefuroxime, and cefdinir. <i>Antimicrobial agents and chemotherapy.</i> 1994;38(12):2902-2904. | Title    |
| 937 | Agger W, Callister S, Jobe D. In vitro susceptibilities of <i>Borrelia burgdorferi</i> to five oral cephalosporins and ceftriaxone. <i>Antimicrobial agents and chemotherapy.</i> 1992;36(8):1788-1790.                                                                                                                                                                         | Abstract |
| 938 | Powell M, Williams J. In vitro susceptibility of <i>Haemophilus influenzae</i> to cefixime. <i>Antimicrobial agents and chemotherapy.</i> 1987;31(11):1841-1842.                                                                                                                                                                                                                | Abstract |
| 939 | Cern A, Connolly KL, Jerse AE, et al. In vitro susceptibility of <i>Neisseria gonorrhoeae</i> strains to mupirocin, an antibiotic reformulated for parenteral administration in nanoliposomes. <i>Antimicrobial agents and chemotherapy.</i> 2018;62(4):e02377-17.                                                                                                              | Title    |
| 940 | Westblom T, Gudipati S, Midkiff B. In vitro susceptibility of <i>Helicobacter pylori</i> to the new oral cephalosporins cefpodoxime, ceftibuten and cefixime. <i>European Journal of Clinical Microbiology and Infectious Diseases.</i> 1990;9(9):691-693.                                                                                                                      | Abstract |
| 941 | Mine Y, Yokota Y, Wakai Y, et al. In vivo antibacterial activity of FK482, a new orally active cephalosporin. <i>J Antibiot (Tokyo).</i> 1988 Dec;41(12):1888-95.                                                                                                                                                                                                               | Title    |



|     |                                                                                                                                                                                                                                                     |        |
|-----|-----------------------------------------------------------------------------------------------------------------------------------------------------------------------------------------------------------------------------------------------------|--------|
| 942 | Sun N, Xie Y, Sheng C, et al. In vivo pharmacokinetics and in vitro antifungal activity of iodiconazole, a new triazole, determined by microdialysis sampling. International journal of antimicrobial agents. 2013;41(3):229-235.                   | Title  |
| 943 | Cao C, Chin N, Neu H. In-vitro activity and $\beta$ -lactamase stability of LY163892. Journal of antimicrobial Chemotherapy. 1988;22(2):155-165.                                                                                                    | Title  |
| 944 | Arguedas AG, Arrieta AC, Stutman HR, et al. In-vitro activity of cefprozil (BMY 28100) and loracarbef (LY 163892) against pathogens obtained from middle ear fluid. Journal of antimicrobial chemotherapy. 1991;27(3):311-318.                      | Title  |
| 945 | McLinn S, Williams D. Incidence of antibiotic-resistant Streptococcus pneumoniae and beta-lactamase-positive Haemophilus influenzae in clinical isolates from patients with otitis media. The Pediatric infectious disease journal. 1996;15(9):3-9. | Title  |
| 946 | Pinatih KJP, Suastika K, Sukrama IDM, et al. Increase in bacteroides/firmicutes ratio after early-life repeated administration of Cefixime in Rat. Bali Med J. 2017;6.                                                                              | Animal |
| 947 | Harcouët L, Lebrech D, Rozé C, et al. Increased intestinal absorption of cefixime by nifedipine in the rat intestinal perfusion model: evidence for a neural regulation. J Pharmacol Exp Ther. 1997 May;281(2):738-45.                              | Animal |
| 948 | Finegold SM, George WL, editors. Anaerobic Infections in Humans: Academic Press; 1989. p. 819-851.                                                                                                                                                  | Title  |
| 949 | Index. Primary Care: Clinics in Office Practice. 1990 1990/09/01;17(3):703-712.                                                                                                                                                                     | Title  |
| 950 | Griffin JP, D'Arcy PF, editors. A Manual of Adverse Drug Interactions (Fifth Edition). Amsterdam: Elsevier Science B.V.; 1997. p. 611-649.                                                                                                          | Title  |
| 951 | Sussman M, editor. Molecular Medical Microbiology. London: Academic Press; 2002. p. i-lxx.                                                                                                                                                          | Title  |
| 952 | Stapleton F, editor. The Anterior Eye and Therapeutics. London: Butterworth-Heinemann; 2003. p. 247-261.                                                                                                                                            | Title  |

|     |                                                                                                                                                                                          |       |
|-----|------------------------------------------------------------------------------------------------------------------------------------------------------------------------------------------|-------|
| 953 | Pediatric Clinics of North America. 2005 2005/06/01/;52(3):949-961.                                                                                                                      | Title |
| 954 | Rosenstock L, Cullen MR, Brodtkin CA, et al., editors. Textbook of Clinical Occupational and Environmental Medicine (Second Edition). Edinburgh: W.B. Saunders; 2005. p. 1285-1338.      | Title |
| 955 | Vékey K, Telekes A, Vertes A, editors. Medical Applications of Mass Spectrometry. Amsterdam: Elsevier; 2008. p. 561-581.                                                                 | Title |
| 956 | Wexler P, editor. Encyclopedia of Toxicology (Third Edition). Oxford: Academic Press; 2014. p. 1067-1276.                                                                                | Title |
| 957 | Bennett JE, Dolin R, Blaser MJ, editors. Mandell, Douglas, and Bennett's Principles and Practice of Infectious Diseases (Eighth Edition). Philadelphia: W.B. Saunders; 2015. p. I1-I120. | Title |
| 958 | Cohen J, Powderly WG, Opal SM, editors. Infectious Diseases (Fourth Edition): Elsevier; 2017. p. I1-I76.                                                                                 | Title |
| 959 | Waller DG, Sampson AP, editors. Medical Pharmacology and Therapeutics (Fifth Edition): Elsevier; 2018. p. 707-729.                                                                       | Title |
| 960 | Schmidt TM, editor. Encyclopedia of Microbiology (Fourth Edition). Oxford: Academic Press; 2019. p. 617-689.                                                                             | Title |
| 961 | Preedy VR, editor. Pathology: Academic Press; 2020. p. 403-415.                                                                                                                          | Title |
| 962 | Wolverton SE, editor. Comprehensive Dermatologic Drug Therapy (Fourth Edition): Elsevier; 2021. p. 787-825.                                                                              | Title |
| 963 | Chassagne F, editor. Medicinal Plants as Anti-Infectives: Academic Press; 2022. p. 555-574.                                                                                              | Title |
| 964 | Nissenson AR, Fine RN, Mehrotra R, et al., editors. Handbook of Dialysis Therapy (Sixth Edition). New Delhi: Elsevier; 2023. p. 809-863.                                                 | Title |
| 965 | Aronson JK, editor. Side Effects of Drugs Annual. Vol. 23: Elsevier; 2000. p. 555-592.                                                                                                   | Title |
| 966 | Cefprozil CS. Index to volume 8. Diagn Microbiol Infect Dis. 1991;14:361-364.                                                                                                            | Title |

|     |                                                                                                                                                                                                                                                                                |          |
|-----|--------------------------------------------------------------------------------------------------------------------------------------------------------------------------------------------------------------------------------------------------------------------------------|----------|
| 967 | Kinoshita Y, Ueno H, Kurata H, et al. Infection-Induced Elevated Plasma Perampanel in a Patient with Hemimegalencephaly. Case Reports in Pediatrics. 2022;2022.                                                                                                                | Title    |
| 968 | Infectious cost of leisure (Keynote lecture). Clinical Microbiology and Infection. 2001 2001/01/01/;7:1-357.                                                                                                                                                                   | Title    |
| 969 | Singlas E, Lebrec D, Gaudin C, et al. Influence de l'insuffisance hépatique sur la pharmacocinétique du céfixime. La Presse médicale (1983). 1989;18(32):1587-1588.                                                                                                            | Title    |
| 970 | SINGLAS E, LEBREC D, GAUDIN C, et al. INFLUENCE OF IMPAIRED LIVER-FUNCTION UPON PHARMACOKINETICS OF CEFIXIME. PRESSE MEDICALE. 1989;18(32):1587-1588.                                                                                                                          | Abstract |
| 971 | Fenoll A, Giménez M, Robledo O, et al. Influence of penicillin/amoxicillin non-susceptibility on the activity of third-generation cephalosporins against Streptococcus pneumoniae. European Journal of Clinical Microbiology & Infectious Diseases. 2008;27(1):75-80.          | Abstract |
| 972 | Satoh T, Igarashi A, Tanno M, et al. Inhibitory effects of baicalein derived from Japanese traditional herbal medicine on SN-38 glucuronidation. Journal of Pharmacy & Pharmaceutical Sciences. 2018;21:195-206.                                                               | Title    |
| 973 | Atta S, Khaliq S, Islam A, et al. Injectable biopolymer based hydrogels for drug delivery applications. Int J Biol Macromol. 2015 Sep;80:240-5.                                                                                                                                | Title    |
| 974 | Salehi B, Sharifi-Rad J, Quispe C, et al. Insights into Eucalyptus genus chemical constituents, biological activities and health-promoting effects. Trends in Food Science & Technology. 2019 2019/09/01/;91:609-624.                                                          | Title    |
| 975 | Luckner P, Brandsch M. Interaction of 31 beta-lactam antibiotics with the H <sup>+</sup> /peptide symporter PEPT2: analysis of affinity constants and comparison with PEPT1. Eur J Pharm Biopharm. 2005 Jan;59(1):17-24.                                                       | Title    |
| 976 | Kramer W, Gutjahr U, Kowalewski S, et al. Interaction of the orally active dianionic cephalosporin cefixime with the uptake system for oligopeptides and $\alpha$ -amino- $\beta$ -lactam antibiotics in rabbit small intestine. Biochemical pharmacology. 1993;46(3):542-546. | Animal   |

|     |                                                                                                                                                                                                                                                                   |          |
|-----|-------------------------------------------------------------------------------------------------------------------------------------------------------------------------------------------------------------------------------------------------------------------|----------|
| 977 | Biswas S, Anisuzzaman SM, Rana MS. International Journal of Pharmaceutical and Phytopharmacological Research (eIJPPR).                                                                                                                                            | Title    |
| 978 | Nishio H. An international review of the safety profile of cefixime. Current therapeutic research. 1994;55:63-67.                                                                                                                                                 | Title    |
| 979 | Scaglione F, Demartini G, Dugnani S, et al. Interpretation of middle ear fluid concentrations of antibiotics: comparison between ceftibuten, cefixime and azithromycin. British journal of clinical pharmacology. 1999;47(3):267.                                 | Abstract |
| 980 | Bergogne-Bérézin E. Interpretation of pharmacologic data in respiratory tract infections. International Journal of Antimicrobial Agents. 1993 1993/01/01/;3:S3-S14.                                                                                               | Title    |
| 981 | Jones RN, Erwin ME, Gooding BB. Interpretive criteria for disk diffusion tests using 5-microgram cefdinir disks with rapidly growing clinical isolates. Journal of clinical microbiology. 1992;30(4):1022-1023.                                                   | Title    |
| 982 | Cazzola M, Matera MG. Interrelationship between pharmacokinetics and pharmacodynamics in choosing the appropriate antibiotic and the dosage regimen for treating acute exacerbations of chronic bronchitis. Respiratory Medicine. 1998 1998/07/01/;92(7):895-901. | Title    |
| 983 | Liu P, Müller M, Grant M, et al. Interstitial tissue concentrations of cefpodoxime. Journal of Antimicrobial Chemotherapy. 2002;50(suppl_1):19-22.                                                                                                                | Title    |
| 984 | Hu YQ, Qian CQ, Zheng LY, et al. Intestinal absorption of cefixime in rats. Zhongguo Yao Li Xue Bao. 1999 Jan;20(1):55-8.                                                                                                                                         | Animal   |
| 985 | Katsura T, Inui K-i. Intestinal Absorption of Drugs Mediated by Drug Transporters: Mechanisms and Regulation. Drug Metabolism and Pharmacokinetics. 2003 2003/01/01/;18(1):1-15.                                                                                  | Title    |

|     |                                                                                                                                                                                                                                                                                                                      |        |
|-----|----------------------------------------------------------------------------------------------------------------------------------------------------------------------------------------------------------------------------------------------------------------------------------------------------------------------|--------|
| 986 | Tsuji A, Tamai I, Nakanishi M, et al. Intestinal brush-border transport of the oral cephalosporin antibiotic, cefdinir, mediated by dipeptide and monocarboxylic acid transport systems in rabbits. <i>Journal of pharmacy and pharmacology</i> . 1993;45(11):996-998.                                               | Animal |
| 987 | Estudante M, Morais JG, Soveral G, et al. Intestinal drug transporters: An overview. <i>Advanced Drug Delivery Reviews</i> . 2013 2013/10/15/;65(10):1340-1356.                                                                                                                                                      | Title  |
| 988 | Anderle P, Huang Y, Sadée W. Intestinal membrane transport of drugs and nutrients: genomics of membrane transporters using expression microarrays. <i>European Journal of Pharmaceutical Sciences</i> . 2004 2004/01/01/;21(1):17-24.                                                                                | Title  |
| 989 | Walter E, Kissel T, Amidon GL. The intestinal peptide carrier: A potential transport system for small peptide derived drugs. <i>Advanced Drug Delivery Reviews</i> . 1996 1996/07/12/;20(1):33-58.                                                                                                                   | Title  |
| 990 | Bretschneider B, Brandsch M, Neubert R. Intestinal transport of beta-lactam antibiotics: analysis of the affinity at the H <sup>+</sup> /peptide symporter (PEPT1), the uptake into Caco-2 cell monolayers and the transepithelial flux. <i>Pharm Res</i> . 1999 Jan;16(1):55-61.                                    | Title  |
| 991 | Kavi J, Ashby J, Wise R, et al. Intraperitoneal penetration of cefpirome. <i>European Journal of Clinical Microbiology and Infectious Diseases</i> . 1989;8(6):556-558.                                                                                                                                              | Title  |
| 992 | Chiu LM, Amsden GW. Intrapulmonary pharmacokinetics of antibacterial agents. <i>American Journal of Respiratory Medicine</i> . 2002;1(3):201-209.                                                                                                                                                                    | Title  |
| 993 | Fujiu M, Yokoo K, Sato J, et al. Introduction of a Thio Functional Group to Diazabicyclooctane: An Effective Modification to Potentiate the Activity of $\beta$ -Lactams against Gram-Negative Bacteria Producing Class A, C, and D Serine $\beta$ -Lactamases. <i>ACS Infect Dis</i> . 2020 Nov 13;6(11):3034-3047. | Title  |
| 994 | Song J-H. Introduction: the goals of antimicrobial therapy. <i>International Journal of Infectious Diseases</i> . 2003;7:S1-S4.                                                                                                                                                                                      | Title  |

|      |                                                                                                                                                                                                                                                                                            |          |
|------|--------------------------------------------------------------------------------------------------------------------------------------------------------------------------------------------------------------------------------------------------------------------------------------------|----------|
| 995  | Ni Y, Chen J, Kokot S. Investigation of the pharmacokinetics and determination of certain cephalosporins in rabbit plasma by a kinetic spectrophotometric method with the aid of chemometrics. Science china chemistry. 2011;54(5):827-834.                                                | Animal   |
| 996  | Kato Y, Sugiura T, Nakadera Y, et al. Investigation of the role of oligopeptide transporter PEPT1 and sodium/glucose cotransporter SGLT1 in intestinal absorption of their substrates using small GTP-binding protein Rab8-null mice. Drug metabolism and disposition. 2009;37(3):602-607. | Animal   |
| 997  | YAMAN YT, Bolat G, Yardimci C, et al. An ionic liquid/bismuth film-modified sensor for the electrochemical detection of cefixime. Turkish Journal of Chemistry. 2018;42(3):826-838.                                                                                                        | Abstract |
| 998  | Bishai WR. Issues in the management of bacterial sinusitis. Otolaryngology - Head and Neck Surgery. 2002 2002/12/01/;127(6, Supplement):S3-S9.                                                                                                                                             | Title    |
| 999  | Al-Sadawi M, Rodriguez Ortega R, Sun N, et al. Jerky movement with ceftazidime: A case of ceftazidime-induced neurotoxicity with a review of the literature. Case Reports in Medicine. 2019;2019.                                                                                          | Title    |
| 1000 | Tablet M, Patel B, Patel B. Journal Club for Pharmaceutical Sciences (JCPS).                                                                                                                                                                                                               | Title    |
| 1001 | O.A.Egorova. Justification of the choice of generation III cephalosporin in the therapy of acute bacterial rhinosinusitis. Academic journal.                                                                                                                                               | Abstract |
| 1002 | Keyword Index. Journal of Chromatography B. 2005 2005/05/25/;819(2):351-358.                                                                                                                                                                                                               | Title    |
| 1003 | Bingen E, Bourgeois F, Chardon H, et al. Killing kinetics of five orally administered antibiotics at clinically achievable concentrations against moraxella catarrhalis. European Journal of Clinical Microbiology and Infectious Diseases. 1992;11(10):923-926.                           | Title    |

|          |                                                                                                                                                                                                                                           |                   |
|----------|-------------------------------------------------------------------------------------------------------------------------------------------------------------------------------------------------------------------------------------------|-------------------|
| 100<br>4 | Westphal JF, Jehl F, Brogard JM. [Kinetics of cefixime biliary clearance in cholecystectomized patients]. Therapie. 1994 Jan-Feb;49(1):35-9.                                                                                              | Not<br>Accessible |
| 100<br>5 | Kenyon C, De Baetselier I, Crucitti T. Kingdom [version 1; referees: awaiting peer review].                                                                                                                                               | Title             |
| 100<br>6 | Nakao Y, Andoh Y, Kitoh O, et al. Laboratory and clinical studies on cefdinir in pediatric field [Journal: Article]. Japanese journal of antibiotics. 1990;43(8):1476-1488.                                                               | Title             |
| 100<br>7 | Grunder G, Zysset-Aschmann Y, Vollenweider F, et al. Lack of pharmacokinetic interaction between linezolid and antacid in healthy volunteers. Antimicrobial agents and chemotherapy. 2006;50(1):68-72.                                    | Title             |
| 100<br>8 | Kuang Y-Y, Zhang Z-B, Xie M-L, et al. Large-scale preparation of amorphous cefixime nanoparticles by antisolvent precipitation in a high-gravity rotating packed bed. Industrial & Engineering Chemistry Research. 2015;54(33):8157-8165. | Abstract          |
| 100<br>9 | Danafar H, Hamidi M. LC-MS method for studying the pharmacokinetics and bioequivalence of clonidine hydrochloride in healthy male volunteers. Avicenna journal of medical biotechnology. 2016;8(2):91.                                    | Title             |
| 101<br>0 | Shipkova M, Svinarov D. LC-MS/MS as a tool for TDM services: Where are we? Clinical Biochemistry. 2016 2016/09/01;49(13):1009-1023.                                                                                                       | Title             |
| 101<br>1 | Novelli A. Le rino-sino-otiti Opinioni a confronto: Il parere del farmacologo.                                                                                                                                                            | Title             |
| 101<br>2 | Navratil H. Le traitement des prostatites aiguës. Médecine et Maladies Infectieuses. 1991 1991/02/01;21(2, Part 2):138-141.                                                                                                               | Title             |
| 101<br>3 | PRICOP C, PUIA D, ANDONE D, et al. LEVOFLOXACIN VERSUS CEFIXIME AS AN EMPIRIC TREATMENT IN ACUTE BACTERIAL PROSTATITIS. FARMACIA. 2021;69(4):682-687.                                                                                     | Abstract          |

|          |                                                                                                                                                                                                                                                                    |          |
|----------|--------------------------------------------------------------------------------------------------------------------------------------------------------------------------------------------------------------------------------------------------------------------|----------|
| 101<br>4 | Gehring R, Riviere JE. Limitations of MIC as the sole criterion in antimicrobial drug dosage regimen design: The need for full characterization of antimicrobial pharmacodynamic profile especially for drug-resistant organisms. <i>Vet J.</i> 2013;198(1):15-18. | Title    |
| 101<br>5 | Peris-Vicente J, Peris-García E, Albiol-Chiva J, et al. Liquid chromatography, a valuable tool in the determination of antibiotics in biological, food and environmental samples. <i>Microchemical Journal.</i> 2022 2022/06/01/;177:107309.                       | Title    |
| 101<br>6 | Liquid column chromatography. <i>Journal of Chromatography A.</i> 1987 1987/01/01/;412:B505-B566.                                                                                                                                                                  | Title    |
| 101<br>7 | Liquid column chromatography. <i>Journal of Chromatography A.</i> 1988 1988/01/01/;460:B121-B262.                                                                                                                                                                  | Title    |
| 101<br>8 | Liquid column chromatography. <i>Journal of Chromatography A.</i> 1990 1990/01/01/;524(4):B481-B641.                                                                                                                                                               | Title    |
| 101<br>9 | Liquid column chromatography. <i>Journal of Chromatography A.</i> 1991 1991/09/11/;561(1):B433-B563.                                                                                                                                                               | Title    |
| 102<br>0 | Liquid column chromatography. <i>Journal of Chromatography A.</i> 1992 1992/06/12/;610(2):B185-B276.                                                                                                                                                               | Title    |
| 102<br>1 | Yang N, Gong F, Zhou Y, et al. Liquid metals: Preparation, surface engineering, and biomedical applications. <i>Coordination Chemistry Reviews.</i> 2022 2022/11/15/;471:214731.                                                                                   | Title    |
| 102<br>2 | McAteer JA, Hiltke MF, Silber BM, et al. Liquid-chromatographic determination of five orally active cephalosporins--cefixime, cefaclor, cefadroxil, cephalixin, and cephradine--in human serum. <i>Clinical Chemistry.</i> 1987;33(10):1788-1790.                  | Abstract |



|          |                                                                                                                                                                                                                                                        |          |
|----------|--------------------------------------------------------------------------------------------------------------------------------------------------------------------------------------------------------------------------------------------------------|----------|
| 102<br>3 | Ata S, Rasool A, Islam A, et al. Loading of Cefixime to pH sensitive chitosan based hydrogel and investigation of controlled release kinetics. International journal of biological macromolecules. 2020;155:1236-1244.                                 | Abstract |
| 102<br>4 | Dalhoff A, Ambrose P, Mouton J. A long journey from minimum inhibitory concentration testing to clinically predictive breakpoints: deterministic and probabilistic approaches in deriving breakpoints. Infection. 2009;37(4):296-305.                  | Title    |
| 102<br>5 | Rubinstein E, Carbon C, Rangaraj M, et al. Lower respiratory tract infections: etiology, current treatment, and experience with fluoroquinolones. Clinical Microbiology and Infection. 1998 1998/04/01/;4:2S42-2S50.                                   | Title    |
| 102<br>6 | Alvarez-Elcoro S, Enzler MJ. The Macrolides: Erythromycin, Clarithromycin, and Azithromycin. Mayo Clinic Proceedings. 1999 1999/06/01/;74(6):613-634.                                                                                                  | Title    |
| 102<br>7 | Nassr N, Lahu G, Hunnemeyer A, et al. Magnesium hydroxide/aluminium hydroxide-containing antacid does not affect the pharmacokinetics of the targeted phosphodiesterase 4 inhibitor roflumilast. Journal of clinical pharmacology. 2007;47(5):660-667. | Title    |
| 102<br>8 | Rubio-Aliaga I, Daniel H. Mammalian peptide transporters as targets for drug delivery. Trends in Pharmacological Sciences. 2002 2002/09/01/;23(9):434-440.                                                                                             | Title    |
| 102<br>9 | Principi N. Management issues in paediatric pharyngitis and otitis media. International Journal of Antimicrobial Agents. 1995 1995/12/01/;6(2):65-79.                                                                                                  | Title    |
| 103<br>0 | Hoehn B, Varon E, de Debroucker T, et al. Management of acute community-acquired bacterial meningitis (excluding newborns). Long version with arguments. Médecine et Maladies Infectieuses. 2019 2019/09/01/;49(6):405-441.                            | Title    |
| 103<br>1 | Nueremberger EL, Bishai WR. Management of community-acquired pneumonia caused by drug-resistant Streptococcus pneumoniae. Management of multiple drug-resistant infections: Springer; 2004. p. 3-29.                                                   | Title    |

|          |                                                                                                                                                                                                                                     |          |
|----------|-------------------------------------------------------------------------------------------------------------------------------------------------------------------------------------------------------------------------------------|----------|
| 103<br>2 | Baker KA, Fotos PG. THE MANAGEMENT OF ODONTOGENIC INFECTIONS: A Rationale for Appropriate Chemotherapy. Dental Clinics of North America. 1994 1994/10/01/;38(4):689-706.                                                            | Title    |
| 103<br>3 | Akin I, KARADEMİR Ü, Belge A, et al. Marbofloxacin Overdose: the Culprit for Acute Blindness in a Dog. Kafkas Univ Vet Fak Derg. 2016;22:623-626.                                                                                   | Animal   |
| 103<br>4 | Ropponen H-K, Richter R, Hirsch AKH, et al. Mastering the Gram-negative bacterial barrier – Chemical approaches to increase bacterial bioavailability of antibiotics. Advanced Drug Delivery Reviews. 2021 2021/05/01/;172:339-360. | Title    |
| 103<br>5 | Özyüncü Ö, Beksac MS, Nemutlu E, et al. Maternal blood and amniotic fluid levels of moxifloxacin, levofloxacin and cefixime. Journal of Obstetrics and Gynaecology Research. 2010;36(3):484-487.                                    | Abstract |
| 103<br>6 | Cline MK, Bailey-Dorton C, Cayelli M. MATERNAL INFECTIONS: Diagnosis and Management. Primary Care: Clinics in Office Practice. 2000 2000/03/01/;27(1):13-33.                                                                        | Title    |
| 103<br>7 | Nahata MC. Measurement of cefixime in serum and cerebrospinal fluid by high-performance liquid chromatography. Journal of liquid chromatography. 1991;14(20):3755-3759.                                                             | Abstract |
| 103<br>8 | Bhatnagar S, Chandra J. Mechanism of Action. Indian Pediatrics. 1999;36:901-904.                                                                                                                                                    | Title    |
| 103<br>9 | Sakamoto H, Hirose T, Nakamoto S, et al. Mechanism of renal excretion of FK027 in dogs and rabbits. J Antibiot (Tokyo). 1985 Aug;38(8):1088-95.                                                                                     | Animal   |
| 104<br>0 | Ikeda F, Tawara S, Matsumoto K, et al. Mechanism of Therapeutic Effectiveness of.                                                                                                                                                   | Title    |
| 104<br>1 | Matsumoto Y, Ikemoto A, Wakai Y, et al. Mechanism of therapeutic effectiveness of cefixime against typhoid fever. Antimicrobial agents and chemotherapy. 2001;45(9):2450-2454.                                                      | Abstract |

|          |                                                                                                                                                                                                                                                          |          |
|----------|----------------------------------------------------------------------------------------------------------------------------------------------------------------------------------------------------------------------------------------------------------|----------|
| 104<br>2 | Venisse N, Grégoire N, Marliat M, et al. Mechanism-based pharmacokinetic-pharmacodynamic models of in vitro fungistatic and fungicidal effects against <i>Candida albicans</i> . <i>Antimicrobial agents and chemotherapy</i> . 2008;52(3):937-943.      | Title    |
| 104<br>3 | Czock D, Keller F. Mechanism-based pharmacokinetic–pharmacodynamic modeling of antimicrobial drug effects. <i>Journal of pharmacokinetics and pharmacodynamics</i> . 2007;34(6):727-751.                                                                 | Title    |
| 104<br>4 | González MJ, Aguilar MV, Martínez MC. Mechanisms of Absorption of As <sub>2</sub> O <sub>5</sub> from Rat Small Intestine: the Effect of Different Parameters. <i>Journal of Trace Elements in Medicine and Biology</i> . 1997 1997/01/01;11(4):239-247. | Animal   |
| 104<br>5 | Jacobs MR, Anon J, Appelbaum PC. Mechanisms of resistance among respiratory tract pathogens. <i>Clinics in Laboratory Medicine</i> . 2004 2004/06/01;24(2):419-453.                                                                                      | Title    |
| 104<br>6 | Stern A, Elmore J. Medication for Gravid and Nursing Dental Patients. <i>Dental Clinics of North America</i> . 2016 2016/04/01;60(2):523-531.                                                                                                            | Title    |
| 104<br>7 | Shikov AN, Pozharitskaya ON, Makarov VG, et al. Medicinal Plants of the Russian Pharmacopoeia; their history and applications. <i>Journal of Ethnopharmacology</i> . 2014 2014/07/03;154(3):481-536.                                                     | Title    |
| 104<br>8 | Munjampalli SKJ, Davis DE. Medicinal-Induced Behavior Disorders. <i>Neurologic Clinics</i> . 2016 2016/02/01;34(1):133-169.                                                                                                                              | Title    |
| 104<br>9 | Rafailidis PI, Pitsounis AI, Falagas ME. Meta-analyses on the Optimization of the Duration of Antimicrobial Treatment for Various Infections. <i>Infectious Disease Clinics of North America</i> . 2009 2009/06/01;23(2):269-276.                        | Title    |
| 105<br>0 | Danish M, Raza M, Ilyas T, et al. Metal complexes and organotin (IV) compounds of cefixime and their biological study. <i>Med Chem</i> . 2015;5.                                                                                                         | Abstract |

|          |                                                                                                                                                                                                                                                                                                                                                                                           |          |
|----------|-------------------------------------------------------------------------------------------------------------------------------------------------------------------------------------------------------------------------------------------------------------------------------------------------------------------------------------------------------------------------------------------|----------|
| 105<br>1 | Alekseev V. Metal complexes of penicillins and cephalosporins. Pharmaceutical chemistry journal. 2012;45(11):679-697.                                                                                                                                                                                                                                                                     | Abstract |
| 105<br>2 | Olurische C, Salawu O, Zezi A, et al. Metformin-Cefixime Co-administration affects glucose regulation and reno-pancreatic histology in alloxan-induced hyperglycemic rats. J Pharma Sci Tech. 2013;3:43-50.                                                                                                                                                                               | Animal   |
| 105<br>3 | Azmi S, Iqbal B, Al Mamari J, et al. Method Development and validation for the determination of cefixime in pure and commercial dosage forms by spectrophotometry. Int J Chem Molec Nucl Mat Metallurg Eng. 2014;8(6):595-601.                                                                                                                                                            | Abstract |
| 105<br>4 | Danafar H. Method validation of clonidine hydrochloride in human plasma by LC-MS technique. Pharmaceutical and Biomedical Research. 2015;1(4):48-58.                                                                                                                                                                                                                                      | Title    |
| 105<br>5 | Barry AL, Fuchs PC. Methods for predicting susceptibility of Streptococcus pneumoniae to cefixime. Journal of clinical microbiology. 1995;33(4):1031-1033.                                                                                                                                                                                                                                | Abstract |
| 105<br>6 | Scangarella-Oman N, Hossain M, Dixon P, et al. Microbiological analysis from a phase ii study in adults evaluating single doses of gepotidacin (GSK2140944) in the treatment of uncomplicated urogenital gonorrhoea caused by neisseria gonorrhoeae [Conference Abstract]. Sexually transmitted infections Conference: 2017 STI and HIV world congress Brazil. 2017;93(Supplement 2):A84. | Title    |
| 105<br>7 | Brook I. Microbiology and Principles of Antimicrobial Therapy for Head and Neck Infections. Infectious Disease Clinics of North America. 2007 2007/06/01/;21(2):355-391.                                                                                                                                                                                                                  | Title    |
| 105<br>8 | Brunner M, Derendorf H, Müller M. Microdialysis for in vivo pharmacokinetic/pharmacodynamic characterization of anti-infective drugs. Current opinion in pharmacology. 2005;5(5):495-499.                                                                                                                                                                                                 | Title    |
| 105<br>9 | Yu W, Cheng Q, Feng J, et al. Microdialysis for pharmacokinetic-pharmacodynamic studies. Die Pharmazie-An International Journal of Pharmaceutical Sciences. 2007;62(12):883-891.                                                                                                                                                                                                          | Title    |

|          |                                                                                                                                                                                                                                                                                                                     |          |
|----------|---------------------------------------------------------------------------------------------------------------------------------------------------------------------------------------------------------------------------------------------------------------------------------------------------------------------|----------|
| 106<br>0 | Plock N, Kloft C. Microdialysis—theoretical background and recent implementation in applied life-sciences. European Journal of Pharmaceutical Sciences. 2005 2005/05/01/;25(1):1-24.                                                                                                                                | Title    |
| 106<br>1 | Tambe V, Pande S, Gadeval A, et al. Microdialysis: an emerging technique for pharmacokinetic–pharmacodynamic profiling. Biopharmaceutics and Pharmacokinetics Considerations: Elsevier; 2021. p. 601-616.                                                                                                           | Title    |
| 106<br>2 | Harrison CJ, Chartrand SA, Rodriguez W, et al. Middle ear effusion concentrations of cefixime during acute otitis media with effusion and otitis media with effusion. Pediatr Infect Dis J. 1997 Aug;16(8):816-7.                                                                                                   | Abstract |
| 106<br>3 | Sharma V, Sharma PC, Kumar V. A mini review on pyridoacridines: Prospective lead compounds in medicinal chemistry. Journal of Advanced Research. 2015 2015/01/01/;6(1):63-71.                                                                                                                                       | Title    |
| 106<br>4 | Eskandari H, Amirzehni M, Asadollahzadeh H, et al. MIP-capped terbium MOF-76 for the selective fluorometric detection of cefixime after its preconcentration with magnetic graphene oxide. Sensors and Actuators B: Chemical. 2018;275:145-154.                                                                     | Abstract |
| 106<br>5 | Hassouna MEM, Mohamed MA. Modeling and optimization of a novel RP-UPLC and MCR spectrophotometric methods for simultaneous determination of five cephalosporins in spiked human plasma: Application to lean six sigma thinking hats and antimicrobial activity. Microchemical Journal. 2019 2019/11/01/;150:104161. | Abstract |
| 106<br>6 | Rakhmatulina M. MODERN PRINCIPLES OF TREATMENT OF GONOCOCCAL INFECTION.                                                                                                                                                                                                                                             | Title    |
| 106<br>7 | Tan Z, Orndorff PE, Shirwaiker RA. Modified Pharmacokinetic/Pharmacodynamic model for electrically activated silver-titanium implant system. Biomater Biomech Bioeng. 2015;2(3):127-141.                                                                                                                            | Title    |

|          |                                                                                                                                                                                                                                                                   |          |
|----------|-------------------------------------------------------------------------------------------------------------------------------------------------------------------------------------------------------------------------------------------------------------------|----------|
| 106<br>8 | Alonso R, Rodríguez-Achaerandio A, Aguirre-Quñonero A, et al. Molecular Epidemiology, Antimicrobial Surveillance, and PK/PD Analysis to Guide the Treatment of Neisseria gonorrhoeae Infections. Pharmaceutics. 2021;13(10):1699.                                 | Title    |
| 106<br>9 | Ahmadian E, Samiei M, Hasanzadeh A, et al. Monitoring of drug resistance towards reducing the toxicity of pharmaceutical compounds: Past, present and future. Journal of Pharmaceutical and Biomedical Analysis. 2020 2020/07/15/;186:113265.                     | Title    |
| 107<br>0 | Müller M. Monitoring tissue drug levels by clinical microdialysis. Alternatives to Laboratory Animals. 2009;37(1_suppl):57-59.                                                                                                                                    | Animal   |
| 107<br>1 | Kafetzis D. Multi-investigator evaluation of the efficacy and safety of cefprozil, amoxicillin-clavulanate, cefixime and cefaclor in the treatment of acute otitis media. European Journal of Clinical Microbiology and Infectious Diseases. 1994;13(10):857-865. | Abstract |
| 107<br>2 | Peyramond D, Tigaud S, Bremard-Oury C, et al. Multicenter comparative trial of cefixime and phenoxymethylpenicillin for group A beta-hemolytic streptococcal tonsillitis. Current therapeutic research. 1994;55:14-21.                                            | Abstract |
| 107<br>3 | Smith BL, Mogabgab WJ, Dalu ZA, et al. Multicenter Trial of Fleroxacin Versus Ceftriaxone in the Treatment of Uncomplicated Gonorrhea. The American Journal of Medicine. 1993 1993/03/22/;94(3, Supplement 1):81S-84S.                                            | Title    |
| 107<br>4 | Taylor R, Bignell C. Multidrug-resistant gonorrhoea: tackling a meaner bug in the UK. Journal of Family Planning and Reproductive Health Care. 2012;38(2):70-72.                                                                                                  | Title    |
| 107<br>5 | Lode H, Müller C, Borner K, et al. Multiple-dose pharmacokinetics of cefprozil and its impact on intestinal flora of volunteers. Antimicrobial agents and chemotherapy. 1992;36(1):144-149.                                                                       | Title    |

|          |                                                                                                                                                                                                                                                                              |          |
|----------|------------------------------------------------------------------------------------------------------------------------------------------------------------------------------------------------------------------------------------------------------------------------------|----------|
| 107<br>6 | Lin C, Radwanski E, Affrime M, et al. Multiple-dose pharmacokinetics of ceftibuten in healthy volunteers. Antimicrobial agents and chemotherapy. 1995;39(2):356-358.                                                                                                         | Title    |
| 107<br>7 | Ensafi AA, Allafchian AR. Multiwall carbon nanotubes decorated with NiFe <sub>2</sub> O <sub>4</sub> magnetic nanoparticles, a new catalyst for voltammetric determination of cefixime. Colloids and Surfaces B: Biointerfaces. 2013;102:687-693.                            | Abstract |
| 107<br>8 | Matin A, Sharma S, Mathur P, et al. Myelosuppression-sparing treatment of central nervous system nocardiosis in a multiple myeloma patient utilizing a tedizolid-based regimen: a case report. International Journal of Antimicrobial Agents. 2017 2017/04/01;49(4):488-492. | Title    |
| 107<br>9 | Zadaliasghar S, Rahimpour E, Khoubnasabjafari M, et al. A nano-platform for phenobarbital determination based on its inhibitory effect on the aggregation of silver nanoparticles/melamine system. Journal of Molecular Liquids. 2020 2020/10/10;316:113891.                 | Title    |
| 108<br>0 | Vassallo A, Silletti MF, Faraone I, et al. Nanoparticulate antibiotic systems as antibacterial agents and antibiotic delivery platforms to fight infections. Journal of Nanomaterials. 2020;2020.                                                                            | Title    |
| 108<br>1 | Zhang W, Taheri-Ledari R, Ganjali F, et al. Nanoscale bioconjugates: A review of the structural attributes of drug-loaded nanocarrier conjugates for selective cancer therapy. Heliyon. 2022 2022/06/01;8(6):e09577.                                                         | Title    |
| 108<br>2 | Rajendran R, Menon KN, Nair SC. Nanotechnology Approaches for Enhanced CNS Drug Delivery in the Management of Schizophrenia. Advanced Pharmaceutical Bulletin. 2022;12(3):490.                                                                                               | Title    |
| 108<br>3 | Bavya MC, George L, Srivastava R, et al. Natural and Synthetic Materials in Regenerative Medicine: Progress Over the Past Five Years☆: Hydrogels: An Insight. In: Olabi A-G, editor. Encyclopedia of Smart Materials. Oxford: Elsevier; 2019. p. 113-144.                    | Title    |
| 108<br>4 | Wang Q, Kuang H, Su Y, et al. Naturally derived anti-inflammatory compounds from Chinese medicinal plants. Journal of Ethnopharmacology. 2013 2013/03/07;146(1):9-39.                                                                                                        | Title    |

|          |                                                                                                                                                                                                                                    |          |
|----------|------------------------------------------------------------------------------------------------------------------------------------------------------------------------------------------------------------------------------------|----------|
| 108<br>5 | Shaker SH, Razooqi QA, Shaban RK. Negative effect of therapeutic, double and overdoses of cefixime on the liver and kidneys of male albino rats. <i>Ann Trop Med Public Health</i> . 2020;23.                                      | Animal   |
| 108<br>6 | Tesh LD, Shaeer KM, Cho JC, et al. Neisseria gonorrhoeae and fosfomycin: Past, present and future. <i>International Journal of Antimicrobial Agents</i> . 2015 2015/09/01/;46(3):290-296.                                          | Title    |
| 108<br>7 | Allen VG, Mitterni L, Seah C, et al. Neisseria gonorrhoeae treatment failure and susceptibility to cefixime in Toronto, Canada. <i>Jama</i> . 2013;309(2):163-170.                                                                 | Abstract |
| 108<br>8 | Bradley JS. <i>Nelson's pocket book of pediatric antimicrobial therapy</i> . AWWE; 2006.                                                                                                                                           | Title    |
| 108<br>9 | Berlioz F, Julien S, Tsocas A, et al. Neural modulation of cephalexin intestinal absorption through the di- and tripeptide brush border transporter of rat jejunum in vivo. <i>J Pharmacol Exp Ther</i> . 1999 Mar;288(3):1037-44. | Animal   |
| 109<br>0 | Birnbaumer D, Fernández-Frackelton M. THE NEW ANTIBIOTICS. <i>Emergency Medicine Clinics of North America</i> . 2000 2000/11/01/;18(4):671-708.                                                                                    | Title    |
| 109<br>1 | Singh J, Arrieta AC. New cephalosporins. <i>Seminars in Pediatric Infectious Diseases</i> . 1999 1999/01/01/;10(1):14-22.                                                                                                          | Abstract |
| 109<br>2 | Talan DA. New concepts in antimicrobial therapy for emergency department infections. <i>Annals of Emergency Medicine</i> . 1999 1999/10/01/;34(4, Part 1):503-516.                                                                 | Title    |
| 109<br>3 | Jones RN. New drugs. <i>Antimicrobial Newsletter</i> . 1985 1985/08/01/;2(8):59-61.                                                                                                                                                | Title    |
| 109<br>4 | Jones RN. New drugs. <i>Antimicrobial Newsletter</i> . 1986 1986/09/01/;3(9):68-70.                                                                                                                                                | Title    |
| 109<br>5 | Hussar DA. New Drugs of 2001. <i>Journal of the American Pharmaceutical Association</i> (1996). 2002 2002/03/01/;42(2):227-266.                                                                                                    | Title    |



|          |                                                                                                                                                                                                                                                                                                                       |          |
|----------|-----------------------------------------------------------------------------------------------------------------------------------------------------------------------------------------------------------------------------------------------------------------------------------------------------------------------|----------|
| 109<br>6 | Jones RN. New drugs— new hopes for infection chemotherapy: Highlights of the twenty-seventh Interscience Conference on Antimicrobial Agents and Chemotherapy (ICAAC), October 4–7, 1987, New York, New York. Antimicrobial Newsletter. 1987 1987/11/01/;4(11):98-100.                                                 | Title    |
| 109<br>7 | Wang L-L, Battini N, Bheemanaboina RRY, et al. A new exploration towards aminothiazolquinolone oximes as potentially multi-targeting antibacterial agents: Design, synthesis and evaluation acting on microbes, DNA, HSA and topoisomerase IV. European Journal of Medicinal Chemistry. 2019 2019/10/01/;179:166-181. | Title    |
| 109<br>8 | Yasui H, Yamaoka K, Nakagawa T. New hepatocellular diffusion model for analysis of hepatobiliary transport processes of drugs. Journal of pharmacokinetics and biopharmaceutics. 1995;23(2):183-203.                                                                                                                  | Title    |
| 109<br>9 | Mazzei T, Novelli A, Esposito S, et al. New insight into the clinical pharmacokinetics of cefaclor: tissue penetration. Journal of chemotherapy. 2000;12(1):53-62.                                                                                                                                                    | Title    |
| 110<br>0 | Yamashita S, Hattori E, Shimada A, et al. New Methods to Evaluate Intestinal Drug Absorption Mediated by Oligopeptide Transporter from In vitro Study using Caco-2 Cells. Drug Metabolism and Pharmacokinetics. 2002 2002/01/01/;17(5):408-415.                                                                       | Title    |
| 110<br>1 | Yamada H, Ueda S, Mutoh M, et al. New orally active cephalosporin esters. J Antibiot (Tokyo). 1990 May;43(5):578-83.                                                                                                                                                                                                  | Abstract |
| 110<br>2 | Ramesh M, Durga MK, Sravani A, et al. A New Stability Indicating Validated RP-HPLC Method for the Simultaneous Estimation of Azithromycin and Cefixime in Bulk and Pharmaceutical Dosage Forms. Asian Journal of Research in Chemistry. 2012;5(8):1067-1073.                                                          | Abstract |
| 110<br>3 | Neu HC. New strategies for the 1990's: antibacterial therapy. International Journal of Antimicrobial Agents. 1991 1991/01/01/;1(1):47-50.                                                                                                                                                                             | Title    |

|          |                                                                                                                                                                                                                                                                         |          |
|----------|-------------------------------------------------------------------------------------------------------------------------------------------------------------------------------------------------------------------------------------------------------------------------|----------|
| 110<br>4 | Ennis DM, Cobbs CG. The newer cephalosporins: aztreonam and imipenem. Infectious Disease Clinics of North America. 1995;9(3):687-713.                                                                                                                                   | Abstract |
| 110<br>5 | Zuckerman JM, Kaye KM. THE NEWER MACROLIDES: Azithromycin and Clarithromycin. Infectious Disease Clinics of North America. 1995 1995/09/01;9(3):731-745.                                                                                                                | Title    |
| 110<br>6 | Manwar JV, Panchale WA, Bakal RL, et al. Newer RP-HPLC method development and validation of cefixime and linezolid in bulk drugs and combined dosage form. International Journal of Pharmacy & Life Sciences. 2021;12(1).                                               | Abstract |
| 110<br>7 | Dailly E, Verdier M-C, Deslandes G, et al. Niveau de preuve du suivi thérapeutique pharmacologique de la ceftriaxone. Therapies. 2012 2012/03/01;67(2):145-149.                                                                                                         | Title    |
| 110<br>8 | Wang Q, Wang Y, Xie Y, et al. Nonionic surfactant vesicles as a novel drug delivery system for increasing the oral bioavailability of Ginsenoside Rb1. Food Bioscience. 2021 2021/08/01;42:101064.                                                                      | Title    |
| 110<br>9 | Hu Y, Hu C, Pan G, et al. Novel chalcone-conjugated, multi-flexible end-group coumarin thiazole hybrids as potential antibacterial repressors against methicillin-resistant Staphylococcus aureus. European Journal of Medicinal Chemistry. 2021 2021/10/15;222:113628. | Title    |
| 111<br>0 | Anirudhan TS, Parvathy J, Nair AS. A novel composite matrix based on polymeric micelle and hydrogel as a drug carrier for the controlled release of dual drugs. Carbohydr Polym. 2016 Jan 20;136:1118-27.                                                               | Title    |
| 111<br>1 | Rezki N, Al-Sodies SA, Ahmed HEA, et al. A novel dicationic ionic liquids encompassing pyridinium hydrazone-phenoxy conjugates as antimicrobial agents targeting diverse high resistant microbial strains. Journal of Molecular Liquids. 2019 2019/06/15;284:431-444.   | Title    |
| 111<br>2 | Dave RA, Morris ME. Novel high/low solubility classification methods for new molecular entities. International Journal of Pharmaceutics. 2016 2016/09/10;511(1):111-126.                                                                                                | Title    |

|          |                                                                                                                                                                                                                                                                                                                                  |          |
|----------|----------------------------------------------------------------------------------------------------------------------------------------------------------------------------------------------------------------------------------------------------------------------------------------------------------------------------------|----------|
| 111<br>3 | Mayumi K, Tachibana M, Yoshida M, et al. The Novel In Vitro Method to Calculate Tissue-to-Plasma Partition Coefficient in Humans for Predicting Pharmacokinetic Profiles by Physiologically-Based Pharmacokinetic Model With High Predictability. <i>Journal of Pharmaceutical Sciences</i> . 2020 2020/07/01/;109(7):2345-2355. | Title    |
| 111<br>4 | Li F-F, Zhang P-L, Tangadanchu VKR, et al. Novel metronidazole-derived three-component hybrids as promising broad-spectrum agents to combat oppressive bacterial resistance. <i>Bioorganic Chemistry</i> . 2022 2022/05/01/;122:105718.                                                                                          | Title    |
| 111<br>5 | Holban AM, Grumezescu AM. Novel Molecular Approaches to Target Microbial Virulence. <i>Novel Molecular Approaches to Target Microbial Virulence: De Gruyter Open Poland</i> ; 2015.                                                                                                                                              | Title    |
| 111<br>6 | Darabi R, Shabani-Nooshabadi M. A Novel Nanostructured Electrochemical Sensor for Determination of Cefixime in the Presence of Mefenamic Acid and Acetaminophen in Pharmaceuticals and Biological Samples. Available at SSRN 3880207. 2021.                                                                                      | Abstract |
| 111<br>7 | Atif S, Baig JA, Afridi HI, et al. Novel nontoxic electrochemical method for the detection of cefadroxil in pharmaceutical formulations and biological samples. <i>Microchemical Journal</i> . 2020 2020/05/01/;154:104574.                                                                                                      | Title    |
| 111<br>8 | Cazzola M. Novel oral cephalosporins. <i>Expert Opinion on Investigational Drugs</i> . 2000;9(2):237-246.                                                                                                                                                                                                                        | Abstract |
| 111<br>9 | Ojani R, Raof JB, Zamani S. A novel sensor for cephalosporins based on electrocatalytic oxidation by poly(o-anisidine)/SDS/Ni modified carbon paste electrode. <i>Talanta</i> . 2010 Jun 15;81(4-5):1522-8.                                                                                                                      | Abstract |
| 112<br>0 | Hassouna ME, Abdelrahman MM, Mohamed MA. Novel spectrophotometric methods for simultaneous determination of Cefixime trihydrate and sodium benzoate in powder for oral suspension dosage form. <i>Glob J Oto</i> . 2017;12(4):555841.                                                                                            | Abstract |

|          |                                                                                                                                                                                                                                                                                                                                                       |          |
|----------|-------------------------------------------------------------------------------------------------------------------------------------------------------------------------------------------------------------------------------------------------------------------------------------------------------------------------------------------------------|----------|
| 112<br>1 | Lieberman D, Schlaeffer F. Once-a-day cefixime versus co-amoxiclav three times daily in the treatment of lower respiratory infections. <i>Journal of Antimicrobial Chemotherapy</i> . 1995;35(2):354-357.                                                                                                                                             | Abstract |
| 112<br>2 | Farooq S, Mazhar A, Ihsan Ul H, et al. One-pot multicomponent synthesis of novel 3, 4-dihydro-3-methyl-2(1H)-quinazolinone derivatives and their biological evaluation as potential antioxidants, enzyme inhibitors, antimicrobials, cytotoxic and anti-inflammatory agents. <i>Arabian Journal of Chemistry</i> . 2020 2020/12/01/;13(12):9145-9165. | Title    |
| 112<br>3 | Chen N, Aleksa K, Woodland C, et al. Ontogeny of drug elimination by the human kidney. <i>Pediatric nephrology</i> . 2006;21(2):160-168.                                                                                                                                                                                                              | Title    |
| 112<br>4 | Amin MR, Das SK, Kabir A, et al. Open Label Randomized Controlled Comparison of Three Alternative Regimes of Ciprofloxacin, Azithromycin and Cefixime for Treatment of Uncomplicated Typhoid Fever in Bangladesh. <i>Mymensingh Med J</i> . 2021 Jul;30(3):725-737.                                                                                   | Abstract |
| 112<br>5 | Pandit A, Arjyal A, Day JN, et al. An open randomized comparison of gatifloxacin versus cefixime for the treatment of uncomplicated enteric fever. <i>PLoS One</i> . 2007 Jun 27;2(6):e542.                                                                                                                                                           | Abstract |
| 112<br>6 | Ong JJ, Pollard TD, Goyanes A, et al. Optical biosensors - Illuminating the path to personalized drug dosing. <i>Biosensors and Bioelectronics</i> . 2021 2021/09/15/;188:113331.                                                                                                                                                                     | Title    |
| 112<br>7 | Neu H. Optimal characteristics of agents to treat uncomplicated urinary tract infections. <i>Infection</i> . 1992;20(4):S266-S271.                                                                                                                                                                                                                    | Title    |
| 112<br>8 | Meltzer EO, Weinstein SF, Zitt MJ. Optimal management of community-acquired acute bacterial rhinosinusitis: the allergist's perspective. <i>Annals of Allergy, Asthma &amp; Immunology</i> . 2006 2006/03/01/;96(3):390-397.                                                                                                                          | Title    |
| 112<br>9 | Jacobs MR. Optimisation of antimicrobial therapy using pharmacokinetic and pharmacodynamic parameters. <i>Clinical Microbiology and Infection</i> . 2001 2001/11/01/;7(11):589-596.                                                                                                                                                                   | Title    |

|          |                                                                                                                                                                                                                                                                                                |          |
|----------|------------------------------------------------------------------------------------------------------------------------------------------------------------------------------------------------------------------------------------------------------------------------------------------------|----------|
| 113<br>0 | Seña AC, Bachmann L, Johnston C, et al. Optimising treatments for sexually transmitted infections: surveillance, pharmacokinetics and pharmacodynamics, therapeutic strategies, and molecular resistance prediction. <i>The Lancet Infectious Diseases</i> . 2020 2020/08/01/;20(8):e181-e191. | Title    |
| 113<br>1 | Maheshwari ML, Memon AA, Memon S, et al. Optimization of HPLC method for determination of cefixime using 2-thiophenecarboxaldehyde as derivatizing reagent: A new approach. <i>Saudi Pharmaceutical Journal</i> . 2015;23(4):444-452.                                                          | Abstract |
| 113<br>2 | Kzar TT, Rasheed AS, Hassan MJM. OPTIMIZATION OF HYDROPHILIC INTERACTION CHROMATOGRAPHY METHOD FOR DETERMINATION OF CEFIXIME IN SOME PHARMACEUTICAL PREPARATIONS USING HPLC COUPLED WITH UV DETECTION.                                                                                         | Abstract |
| 113<br>3 | Nicolau DP. Optimizing outcomes with antimicrobial therapy through pharmacodynamic profiling. <i>Journal of infection and chemotherapy</i> . 2003;9(4):292-296.                                                                                                                                | Title    |
| 113<br>4 | Hampson NB, Woolf RA, Springmeyer SC. Oral Antibiotics for Pneumonia. <i>Clinics in Chest Medicine</i> . 1991 1991/06/01/;12(2):395-407.                                                                                                                                                       | Title    |
| 113<br>5 | Shenep J, Flynn P, Baker D, et al. Oral cefixime is similar to continued intravenous antibiotics in the empirical treatment of febrile neutropenic children with cancer. <i>Clinical infectious diseases</i> . 2001;32(1):36-43.                                                               | Abstract |
| 113<br>6 | PORTILLA I, LUTZ B, MONTALVO M, et al. Oral cefixime versus intramuscular ceftriaxone in patients with uncomplicated gonococcal infections. <i>Sexually transmitted diseases</i> . 1992:94-98.                                                                                                 | Abstract |
| 113<br>7 | Stewart AG, Harris PN, Henderson A, et al. Oral cephalosporin and $\beta$ -lactamase inhibitor combinations for ESBL-producing Enterobacteriaceae urinary tract infections. <i>Journal of Antimicrobial Chemotherapy</i> . 2020;75(9):2384-2393.                                               | Abstract |

|          |                                                                                                                                                                                                     |          |
|----------|-----------------------------------------------------------------------------------------------------------------------------------------------------------------------------------------------------|----------|
| 113<br>8 | Bryskier A, Lebel M. Oral cephalosporins. Antimicrobial Agents: Antibacterials and Antifungals. 2005:222-268.                                                                                       | Abstract |
| 113<br>9 | HARRIS A. Oral cephalosporins. Journal of Antimicrobial Chemotherapy. 1992;30(3):398-399.                                                                                                           | Abstract |
| 114<br>0 | Rimmer DM. Oral cephalosporins for use in a parenteral-to-oral switch programme. Infection. 1995;23 Suppl 2:S87-90.                                                                                 | Abstract |
| 114<br>1 | Moellering RC. Oral cephalosporins in perspective. Clinical Drug Investigation. 1995;9(3):1-10.                                                                                                     | Abstract |
| 114<br>2 | Bergogne-Bérézin E. Oral cephalosporins in the treatment of respiratory tract infections. Current therapeutic research. 1996;57(13):87-96.                                                          | Abstract |
| 114<br>3 | Garcia-Rodriguez J, Bellido JM. Oral cephalosporins in uncomplicated urinary tract infections. Clinical microbiology and infection. 2000;6:73-75.                                                   | Abstract |
| 114<br>4 | Morrow JD. The Oral Cephalosporins—A Review. The American Journal of the Medical Sciences. 1992 1992/01/01/;303(1):35-39.                                                                           | Title    |
| 114<br>5 | Bennet R, Eriksson M, Odenholt I. Oral cephalosporins: how should they be used?                                                                                                                     | Abstract |
| 114<br>6 | Levi ME, Eusterman VD. Oral Infections and Antibiotic Therapy. Otolaryngologic Clinics of North America. 2011 2011/02/01/;44(1):57-78.                                                              | Title    |
| 114<br>7 | Ayazi K, Tofigh AM, Qaderi S, et al. Oral Metronidazole and Cefixime as Prophylaxis on Wound Complications of Uncomplicated Appendicitis Following Appendectomy: A Randomized Clinical Trial. 2021. | Abstract |

|          |                                                                                                                                                                                                                                                          |          |
|----------|----------------------------------------------------------------------------------------------------------------------------------------------------------------------------------------------------------------------------------------------------------|----------|
| 114<br>8 | Oral presentations. <i>Clinical Microbiology and Infection</i> . 2010 2010/04/01/;16:S1-S131.                                                                                                                                                            | Title    |
| 114<br>9 | Oral Sessions. <i>International Journal of Antimicrobial Agents</i> . 2017 2017/11/01/;50:S29-S68.                                                                                                                                                       | Title    |
| 115<br>0 | Molloy L, Barron S, Khan N, et al. Oral $\beta$ -Lactam Antibiotics for Pediatric Otitis Media, Rhinosinusitis, and Pneumonia. <i>Journal of Pediatric Health Care</i> . 2020 2020/05/01/;34(3):291-300.                                                 | Title    |
| 115<br>1 | Fujita D, Saito Y, Nakanishi T, et al. Organic Anion Transporting Polypeptide (OATP)2B1 Contributes to Gastrointestinal Toxicity of Anticancer Drug SN-38, Active Metabolite of Irinotecan Hydrochloride. <i>Drug Metab Dispos</i> . 2016 Jan;44(1):1-7. | Title    |
| 115<br>2 | Rafal'skiy V. Ostryy neoslozhnennyy tsistit: novye tendentsii v antimikrobnoy terapii. <i>Consilium Medicum</i> . 2012;14(7):28-33.                                                                                                                      | Title    |
| 115<br>3 | Novick WJ. The other side of early antimicrobial development. <i>Antimicrobial Newsletter</i> . 1986 1986/09/01/;3(9):63-68.                                                                                                                             | Title    |
| 115<br>4 | Pokharel S, Karki M, Acharya B, et al. Outbreak of acute undifferentiated febrile illness in Kathmandu, Nepal: clinical and epidemiological investigation. <i>BMC Infect Dis</i> . 2020 Jan 30;20(1):89.                                                 | Title    |
| 115<br>5 | Williams LL, Wilimas JA, Harris SC, et al. Outpatient therapy with ceftriaxone and oral cefixime for selected febrile children with sickle cell disease. <i>Journal of Pediatric Hematology Oncology</i> . 1996;18:257-261.                              | Abstract |
| 115<br>6 | Hamilton-Miller J. Overview of cefixime use in community-acquired infections. <i>Clinical microbiology and infection</i> . 2000;6:79-81.                                                                                                                 | Abstract |
| 115<br>7 | Craig WA. Overview of newer antimicrobial formulations for overcoming pneumococcal resistance. <i>The American Journal of Medicine Supplements</i> . 2004 2004/08/02/;117(3, Supplement 1):16-22.                                                        | Title    |

|          |                                                                                                                                                                                                                                                                                 |          |
|----------|---------------------------------------------------------------------------------------------------------------------------------------------------------------------------------------------------------------------------------------------------------------------------------|----------|
| 115<br>8 | Brown TJ, Yen-Moore A, Tying SK. An overview of sexually transmitted diseases. Part I. Journal of the American Academy of Dermatology. 1999 1999/10/01/;41(4):511-529.                                                                                                          | Title    |
| 115<br>9 | Adam D. Overview of the clinical features of cefixime. Chemotherapy. 1998;44(Suppl. 1):1-5.                                                                                                                                                                                     | Abstract |
| 116<br>0 | 山作房之輔, 鈴木康稔, 宇野勝次. Oxime 型新経口 Cephem 剤の薬動力学的研究 CS-807, T-2588, Cefixime の同一被験者における比較. Chemotherapy. 1988;36(Supplement1):267-273.                                                                                                                                               | Title    |
| 116<br>1 | Verma SR, Doshi A. P-01 Release study of Levofloxacin Hemihydrate from Nanostructured Hetrolipid matrix for Ocular Delivery. International journal of Nanomedicine. 2011;6:683-692.                                                                                             | Title    |
| 116<br>2 | Golparian D, Hadad R, Hellmark B, et al. P2. 087 In Vitro Antimicrobial Synergy Testing, Using Etest Methodology, of Neisseria Gonorrhoeae For Evaluation of Susceptibility When Using Dual Antimicrobial Therapy? Sexually Transmitted Infections. 2013;89(Suppl 1):A114-A115. | Title    |
| 116<br>3 | Acevedo A, Ingold A, Parnizzari F, et al. P2. 088 N. Gonorrhoeae Antimicrobial Resistance in Uruguay: Period 2010–2011. Sexually Transmitted Infections. 2013;89(Suppl 1):A115-A115.                                                                                            | Title    |
| 116<br>4 | Lefebvre B, Labbé A, Venne S, et al. P2. 089 Antimicrobial Susceptibility Profile of Neisseria Gonorrhoeae Isolates in the Province of Québec: 2012. Sexually Transmitted Infections. 2013;89(Suppl 1):A115-A115.                                                               | Title    |
| 116<br>5 | Barbee L, Black D, Golden M. P2. 090 Multi-Dose Cefixime For Reduced Susceptibility Gonorrhea: A Pharmacokinetic Model. Sexually Transmitted Infections. 2013;89(Suppl 1):A115-A116.                                                                                            | Abstract |
| 116<br>6 | Tantalo L, Mayans MV, Cazorla MU, et al. P394 Evaluation of the in vitro efficacy of cefixime, dalbavancin, isoniazid, and pyrazinamide against Treponema pallidum. BMJ Publishing Group Ltd; 2021.                                                                             | Abstract |
| 116<br>7 | Kersh E, Kang J, Dorji T, et al. P693 Neisseria gonorrhoeae in-vitro susceptibilities to ceftriaxone, cefixime and azithromycin in GISP isolates, 1987–2017. Sexually Transmitted Infections. 2019;95(Suppl 1):A303.                                                            | Abstract |



|          |                                                                                                                                                                                                                                                                                                              |          |
|----------|--------------------------------------------------------------------------------------------------------------------------------------------------------------------------------------------------------------------------------------------------------------------------------------------------------------|----------|
| 116<br>8 | P941 – P1197. <i>Clinical Microbiology and Infection</i> . 2006 2006/01/01/;12:S292-S383.                                                                                                                                                                                                                    | Title    |
| 116<br>9 | Cafini F, Torrico M, Gonzalez N, et al. P2060 Effects of cefditoren, cefuroxime, cefaclor and cefixime on the competitive growth of <i>Streptococcus pneumoniae</i> , as a model approach to selection of populations. <i>International Journal of Antimicrobial Agents</i> . 2007 2007/03/01/;29:S594-S595. | Abstract |
| 117<br>0 | Treadway G, Pontani D. Paediatric safety of azithromycin: worldwide experience. <i>Journal of Antimicrobial Chemotherapy</i> . 1996;37(suppl_C):143-149.                                                                                                                                                     | Title    |
| 117<br>1 | Rashed AN, Jackson C, Gastine S, et al. Page Paediatric pharmacokinetics of the antibiotics in the Access and Watch groups of the 2019 WHO Model List of Essential Medicines for Children: A systematic review.                                                                                              | Title    |
| 117<br>2 | Baba S, Kinoshita H, Mori Y, et al. A parallel comparative double blind study of cefixime with cefaclor in the treatment of acute suppurative otitis media in children. <i>The Japanese Journal of Antibiotics</i> . 1987;40(1):1-24.                                                                        | Abstract |
| 117<br>3 | Matsunaga T, Ogino H, Asai H, et al. A parallel comparative double blind study of cefixime with cefroxadine in the treatment of acute lacunar tonsillitis. <i>The Japanese journal of antibiotics</i> . 1987;40(1):25-54.                                                                                    | Abstract |
| 117<br>4 | Debbia E, Marchese A, Pesce A, et al. Parameters characterizing the in vitro activity of cefixime, a new oral broad spectrum cephalosporin, against respiratory and urinary pathogens. <i>Journal of chemotherapy</i> . 1992;4(3):131-144.                                                                   | Abstract |
| 117<br>5 | Craig WA, Andes DR. Parenteral versus oral antibiotic therapy. <i>Medical Clinics of North America</i> . 1995 1995/01/01/;79(3):497-508.                                                                                                                                                                     | Title    |
| 117<br>6 | Amraei A, Niazi A. Partial least square and parallel factor analysis methods applied for spectrophotometric determination of cefixime in pharmaceutical formulations and biological fluids. <i>Iranian Journal of Pharmaceutical Research: IJPR</i> . 2018;17(4):1191.                                       | Abstract |

|          |                                                                                                                                                                                                                                                                          |          |
|----------|--------------------------------------------------------------------------------------------------------------------------------------------------------------------------------------------------------------------------------------------------------------------------|----------|
| 117<br>7 | Eltantawy MNM. Partial Surface Selenization of Cobalt Sulfide Microspheres for Enhancing the Hydrogen Evolution Reaction. American Chemical Society. 2018.                                                                                                               | Title    |
| 117<br>8 | Pichichero ME. Pathogen shifts and changing cure rates for otitis media and tonsillopharyngitis. Clinical pediatrics. 2006;45(6):493-502.                                                                                                                                | Title    |
| 117<br>9 | Cornaglia G, Ligozzi M, Bauernfeind A, et al. PBP binding and periplasmic concentration as determinants of the antibacterial activities of three new oral cephalosporins in Escherichia coli. New Microbiol. 1994 Jul;17(3):203-10.                                      | Abstract |
| 118<br>0 | Strickley RG, Iwata Q, Wu S, et al. Pediatric Drugs-A Review of Commercially Available Oral Formulations. Journal of Pharmaceutical Sciences. 2008 2008/05/01;97(5):1731-1774.                                                                                           | Title    |
| 118<br>1 | Rashed AN, Jackson C, Gastine S, et al. Pediatric pharmacokinetics of the antibiotics in the access and watch groups of the 2019 WHO model list of essential medicines for children: a systematic review. Expert review of clinical pharmacology. 2019;12(12):1099-1106. | Title    |
| 118<br>2 | Somekh E, Heifetz L, Dan M, et al. Penetration and bactericidal activity of cefixime in synovial fluid. Antimicrobial agents and chemotherapy. 1996;40(5):1198-1200.                                                                                                     | Abstract |
| 118<br>3 | Lee VHL, Yamamoto A. Penetration and enzymatic barriers to peptide and protein absorption. Advanced Drug Delivery Reviews. 1989 1989/10/01;4(2):171-207.                                                                                                                 | Title    |
| 118<br>4 | Tod B, Chaine G, Oliary J, et al. Penetration of cefixime in the anterior chamber of the human eye. Journal Francais D'ophtalmologie. 1991;14(8-9):477-480.                                                                                                              | Abstract |
| 118<br>5 | Bergeron MG, Turcotte A. Penetration of cefixime into fibrin clots and in vivo efficacy against Escherichia coli, Klebsiella pneumoniae, and Staphylococcus aureus. Antimicrobial agents and chemotherapy. 1986;30(6):913-916.                                           | Abstract |

|          |                                                                                                                                                                                                                                                                      |          |
|----------|----------------------------------------------------------------------------------------------------------------------------------------------------------------------------------------------------------------------------------------------------------------------|----------|
| 118<br>6 | MacGowan A, White L, Brown E, et al. Penetration of cefixime into the cerebrospinal fluid of patients with non-inflamed meninges. <i>Journal of Antimicrobial Chemotherapy</i> . 1993;32(5):783-784.                                                                 | Abstract |
| 118<br>7 | Muller-Serieys C, Bancal C, Dombret M, et al. Penetration of cefpodoxime proxetil in lung parenchyma and epithelial lining fluid of noninfected patients. <i>Antimicrobial agents and chemotherapy</i> . 1992;36(10):2099-2103.                                      | Title    |
| 118<br>8 | Nau R, Sorgel F, Eiffert H. Penetration of drugs through the blood-cerebrospinal fluid/blood-brain barrier for treatment of central nervous system infections. <i>Clinical microbiology reviews</i> . 2010;23(4):858-883.                                            | Title    |
| 118<br>9 | Hadinegoro SRS, Tumbelaka AR, Satari HI. Pengobatan cefixime pada demam tifoid anak. <i>Sari Pediatri</i> . 2016;2(4):182-7.                                                                                                                                         | Title    |
| 119<br>0 | Midtvedt T. Penicillins, cephalosporins, and tetracyclines. In: Aronson JK, Van Boxtel CJ, editors. <i>Side Effects of Drugs Annual</i> . Vol. 17: Elsevier; 1993. p. 296-302.                                                                                       | Abstract |
| 119<br>1 | Midtvedt T. Penicillins, cephalosporins, other $\beta$ -lactam antibiotics, and tetracyclines. In: Aronson JK, editor. <i>Side Effects of Drugs Annual</i> . Vol. 23: Elsevier; 2000. p. 250-260.                                                                    | Abstract |
| 119<br>2 | Wang L, Wang C, Liu Q, et al. PEPT1- and OAT1/3-mediated drug–drug interactions between bestatin and cefixime in vivo and in vitro in rats, and in vitro in human. <i>European Journal of Pharmaceutical Sciences</i> . 2014 2014/10/15/;63:77-86.                   | Animal   |
| 119<br>3 | Wenzel U, Kuntz S, Diestel S, et al. PEPT1-mediated cefixime uptake into human intestinal epithelial cells is increased by Ca <sup>2+</sup> channel blockers. <i>Antimicrobial agents and chemotherapy</i> . 2002;46(5):1375-1380.                                   | Abstract |
| 119<br>4 | Ma K, Hu Y, Smith DE. Peptide Transporter 1 Is Responsible for Intestinal Uptake of the Dipeptide Glycylsarcosine: Studies in Everted Jejunal Rings from Wild-type and Pept1 Null Mice. <i>Journal of Pharmaceutical Sciences</i> . 2011 2011/02/01/;100(2):767-774. | Animal   |

|          |                                                                                                                                                                                                                                                                             |          |
|----------|-----------------------------------------------------------------------------------------------------------------------------------------------------------------------------------------------------------------------------------------------------------------------------|----------|
| 119<br>5 | Hidalgo IJ, Ryan FM, Marks GJ, et al. pH-dependent transepithelial transport of cephalexin in rabbit intestinal mucosa. <i>International Journal of Pharmaceutics</i> . 1993 1993/08/31/;98(1):83-92.                                                                       | Animal   |
| 119<br>6 | Jewesson PJ. Pharmaceutical, pharmacokinetic and other considerations for intravenous to oral stepdown therapy. <i>Canadian Journal of Infectious Diseases</i> . 1995;6(Suppl A):11A-16A.                                                                                   | Title    |
| 119<br>7 | Bergogne-Bérézin E. Pharmacocinétique des antibiotiques dans les voies respiratoires inférieures. Limites de l'apport de cette information. <i>Médecine et Maladies Infectieuses</i> . 1992 1992/02/01/;22:103-113.                                                         | Title    |
| 119<br>8 | Montay G, Le Liboux A, Thebault J, et al. Pharmacocinétique du céfixime chez le volontaire sain après administration orale unique à la dose de 200 mg. <i>La Presse médicale (1983)</i> . 1989;18(32):1583-1586.                                                            | Title    |
| 119<br>9 | Guay DR. Pharmacodynamics and pharmacokinetics of cefdinir, an oral extended spectrum cephalosporin. <i>The Pediatric infectious disease journal</i> . 2000;19(12):S141-S146.                                                                                               | Title    |
| 120<br>0 | Smith PF, Tsuji B, Booker BM, et al. Pharmacodynamics of cefprozil against <i>Haemophilus influenzae</i> in an in vitro pharmacodynamic model. <i>Diagnostic Microbiology and Infectious Disease</i> . 2006 2006/12/01/;56(4):379-386.                                      | Title    |
| 120<br>1 | Werth BJ, Shireman LM. Pharmacodynamics of ceftaroline plus ampicillin against <i>Enterococcus faecalis</i> in an in vitro pharmacokinetic/pharmacodynamic model of simulated endocardial vegetations. <i>Antimicrobial Agents and Chemotherapy</i> . 2017;61(4):e02235-16. | Title    |
| 120<br>2 | Owens Jr RC, Tessier P, Nightingale CH, et al. Pharmacodynamics of ceftriaxone and cefixime against community-acquired respiratory tract pathogens. <i>International journal of antimicrobial agents</i> . 2001;17(6):483-489.                                              | Abstract |
| 120<br>3 | Eandi M, Giudice ML. Pharmacoeconomic evaluation of cefaclor in the pharyngo-tonsillitis and acute otitis in children. <i>Farmeconomia Health economics and therapeutic pathways</i> . 2006;7(1):5-20.                                                                      | Title    |

|          |                                                                                                                                                                                                                                                                                                     |          |
|----------|-----------------------------------------------------------------------------------------------------------------------------------------------------------------------------------------------------------------------------------------------------------------------------------------------------|----------|
| 120<br>4 | Dellamonica P, Garraffo R, Etesse-Carsenti H, et al. Pharmacokinetic and bacteriological study of cefadroxil-salicylate and josamycin-salicylate drug regimens. International journal of clinical pharmacology research. 1993;13(1):11-20.                                                          | Title    |
| 120<br>5 | Muhammad IN, Shoaib MH, Yousuf RI. Pharmacokinetic and bioequivalence studies of oral cefuroxime axetil 250 mg tablets in healthy human subjects. Journal of Bioequivalence & Bioavailability. 2014;6(5):149.                                                                                       | Title    |
| 120<br>6 | Zakeri-Milani P, Valizadeh H, Islambulchilar Z, et al. Pharmacokinetic and bioequivalence study of two brands of valsartan tablets in healthy male volunteers. Arzneimittelforschung. 2010;60(02):76-80.                                                                                            | Title    |
| 120<br>7 | Neu H. Pharmacokinetic and clinical studies of cefixime: a worldwide review. Journal of chemotherapy (Florence, Italy). 1989;1(4 Suppl):531-533.                                                                                                                                                    | Title    |
| 120<br>8 | Shimada K. Pharmacokinetic and clinical study on cefixime (CFIX) in the elderly. Chemotherapy. 1985;33(Suppl 6):298-303.                                                                                                                                                                            | Abstract |
| 120<br>9 | Mazzei T, Cassetta MI, Fallani S, et al. Pharmacokinetic and pharmacodynamic aspects of antimicrobial agents for the treatment of uncomplicated urinary tract infections. International journal of antimicrobial agents. 2006;28:35-41.                                                             | Title    |
| 121<br>0 | Tauzin M, Ouldali N, Béchet S, et al. Pharmacokinetic and pharmacodynamic considerations of cephalosporin use in children. Expert Opinion on Drug Metabolism & Toxicology. 2019;15(11):869-880.                                                                                                     | Abstract |
| 121<br>1 | Mukker JK, Singh RSP, Derendorf H. Pharmacokinetic and pharmacodynamic implications in inhalable antimicrobial therapy. Advanced drug delivery reviews. 2015;85:57-64.                                                                                                                              | Title    |
| 121<br>2 | Al-Tamimi DJJ, Al-Mahroos MIA, Al-Tamimi MJJ, et al. Pharmacokinetic Comparison and Bioequivalence Evaluation between a Newly Formulated Generic and the Brand Cefuroxime Axetil Tablets in Healthy Male Adult Fasting Subjects. Research Journal of Pharmacy and Technology. 2022;15(5):2184-2192. | Title    |

|          |                                                                                                                                                                                                                                                                                        |                |
|----------|----------------------------------------------------------------------------------------------------------------------------------------------------------------------------------------------------------------------------------------------------------------------------------------|----------------|
| 121<br>3 | Smith A, Henriksen B, Cohen A. Pharmacokinetic considerations in Roux-en-Y gastric bypass patients. American Journal of Health-System Pharmacy. 2011;68(23):2241-2247.                                                                                                                 | Title          |
| 121<br>4 | Kong FYS, Horner P, Unemo M, et al. Pharmacokinetic considerations regarding the treatment of bacterial sexually transmitted infections with azithromycin: a review. Journal of Antimicrobial Chemotherapy. 2019;74(5):1157-1166.                                                      | Title          |
| 121<br>5 | Connolly KL, Eakin AE, Gomez C, et al. Pharmacokinetic data are predictive of in vivo efficacy for cefixime and ceftriaxone against susceptible and resistant Neisseria gonorrhoeae strains in the gonorrhea mouse model. Antimicrobial agents and chemotherapy. 2019;63(3):e01644-18. | Animal         |
| 121<br>6 | Jack DB. Pharmacokinetic data on cephalosporins and other anti-infective agents. Handbook of Clinical Pharmacokinetic Data: Springer; 1992. p. 89-94.                                                                                                                                  | Title          |
| 121<br>7 | Negro RD. Pharmacokinetic drug interactions with anti-ulcer drugs. Clinical pharmacokinetics. 1998;35(2):135-150.                                                                                                                                                                      | Title          |
| 121<br>8 | Yasar S. Pharmacokinetic Drug-drug Interaction Studies Of Rosuvastatin With Ompeprazole, Cefixime And Clopidogrel: University of Peshawar, Peshawar; 2013.                                                                                                                             | Abstract       |
| 121<br>9 | Petitjean O, Brion N, Tod M, et al. Pharmacokinetic interaction of cefixime and 2 antacids. Preliminary results. Presse Medicale (Paris, France: 1983). 1989;18(32):1596-1598.                                                                                                         | Not Accessible |
| 122<br>0 | Homed KA, Tam JY, Prober CG. Pharmacokinetic optimisation of the treatment of septic arthritis. Clinical pharmacokinetics. 1996;31(2):156-163.                                                                                                                                         | Title          |
| 122<br>1 | Barre J. Pharmacokinetic properties of cefixime. Presse Medicale (Paris, France: 1983). 1989;18(32):1578-1582.                                                                                                                                                                         | Abstract       |
| 122<br>2 | Kneer J. Pharmacokinetic properties of new oral cephalosporins. Médecine et maladies infectieuses. 1992;22:556-564.                                                                                                                                                                    | Abstract       |

|          |                                                                                                                                                                                                                                   |          |
|----------|-----------------------------------------------------------------------------------------------------------------------------------------------------------------------------------------------------------------------------------|----------|
| 122<br>3 | Zhou H. Pharmacokinetic strategies in deciphering atypical drug absorption profiles. The Journal of Clinical Pharmacology. 2003;43(3):211-227.                                                                                    | Title    |
| 122<br>4 | Nakamura H, Iwai N. Pharmacokinetic studies an oral antibiotics in pediatrics. I. A pharmacokinetic study on cefixime in pediatrics. Japanese journal of antibiotics. 1991;44(9):964-978.                                         | Abstract |
| 122<br>5 | Saito A. Pharmacokinetic studies on cefixime. Chemotherapy. 1985;33(6):190-203.                                                                                                                                                   | Abstract |
| 122<br>6 | Nakamura H, Iwai N. Pharmacokinetic studies on oral antibiotics in pediatrics. I. A pharmacokinetic study on cefixime in pediatrics. The Japanese Journal of Antibiotics. 1991;44(9):964-978.                                     | Abstract |
| 122<br>7 | Kanamaru MO, Kitada A. Pharmacokinetic Study of an Oral. Antimicrob Agents Chemother. 1998;42(7):1718.                                                                                                                            | Title    |
| 122<br>8 | Hishida A, Ohishi K, Nagashima S, et al. Pharmacokinetic study of an oral cephalosporin, cefdinir, in hemodialysis patients. Antimicrobial agents and chemotherapy. 1998;42(7):1718-1721.                                         | Title    |
| 122<br>9 | EIDalo A, Ali A, Shaddad S, et al. Pharmacokinetic study of cefixime in the sheep the and cattle. Journal of Animal and Veterinary Advances. 2004.                                                                                | Animal   |
| 123<br>0 | Zhao D, Liu X-F, Tian Y-G, et al. The pharmacokinetic study of Tanreqing and the interaction with cefixime in rat model of pneumonia by validated UPLC-MS/MS. Journal of Pharmaceutical and Biomedical Analysis. 2022;209:114484. | Animal   |
| 123<br>1 | Yamasaku F, Suzuki Y, Uno K. Pharmacokinetic study on new oxime-type oral cepheids, comparison of CS-807, T-2588 and cefixime in the same subjects. Chemotherapy (Tokyo). 1988;36(Suppl 1):267-273.                               | Abstract |
| 123<br>2 | Neely MN, Reed MD. Pharmacokinetic-pharmacodynamic basis of optimal antibiotic therapy. Principles and Practice of Pediatric Infectious Diseases 3rd ed Churchill Livingstone Elsevier. 2008:1404-15.                             | Title    |

|          |                                                                                                                                                                                                                                                            |          |
|----------|------------------------------------------------------------------------------------------------------------------------------------------------------------------------------------------------------------------------------------------------------------|----------|
| 123<br>3 | Liu P, Rand KH, Obermann B, et al. Pharmacokinetic-pharmacodynamic modelling of antibacterial activity of cefpodoxime and cefixime in in vitro kinetic models. International journal of antimicrobial agents. 2005;25(2):120-129.                          | Abstract |
| 123<br>4 | Picco E, Cerra M, Stiefel S, et al. Pharmacokinetic-Pharmacodynamic study of Cephalexin and Gentamicin antibacterial activity against sensible strains using a simple one-compartment in vitro model. Revue Méd Vét. 2011;162(1):45-49.                    | Title    |
| 123<br>5 | Katsube T, Yano Y, Yamano Y, et al. Pharmacokinetic–pharmacodynamic modeling and simulation for bactericidal effect in an in vitro dynamic model. Journal of pharmaceutical sciences. 2008;97(9):4108-4117.                                                | Title    |
| 123<br>6 | Katsube T, Yamano Y, Yano Y. Pharmacokinetic–pharmacodynamic modeling and simulation for in vivo bactericidal effect in murine infection model. Journal of pharmaceutical sciences. 2008;97(4):1606-1614.                                                  | Title    |
| 123<br>7 | Tajima T, Kondo Y, Negishi S, et al. Pharmacokinetic, bacteriological and clinical studies on S-1108 in children. The Japanese Journal of Antibiotics. 1993;46(11):953-958.                                                                                | Title    |
| 123<br>8 | Theuretzbacher U, Barbee L, Connolly K, et al. Pharmacokinetic/pharmacodynamic considerations for new and current therapeutic drugs for uncomplicated gonorrhoea—challenges and opportunities. Clinical Microbiology and Infection. 2020;26(12):1630-1635. | Title    |
| 123<br>9 | Schuck EL, Derendorf H. Pharmacokinetic/pharmacodynamic evaluation of anti-infective agents. Expert review of anti-infective therapy. 2005;3(3):361-373.                                                                                                   | Title    |
| 124<br>0 | Isla A, Canut A, Gascón AR, et al. Pharmacokinetic/pharmacodynamic evaluation of antimicrobial treatments of orofacial odontogenic infections. Clinical pharmacokinetics. 2005;44(3):305-316.                                                              | Title    |
| 124<br>1 | Li Y, Nguyen MH, Cheng S, et al. A pharmacokinetic/pharmacodynamic mathematical model accurately describes the activity of voriconazole against Candida spp. in vitro. International journal of antimicrobial agents. 2008;31(4):369-374.                  | Title    |



|          |                                                                                                                                                                                                                                                                                                |          |
|----------|------------------------------------------------------------------------------------------------------------------------------------------------------------------------------------------------------------------------------------------------------------------------------------------------|----------|
| 124<br>2 | Wu B, Derendorf H. Pharmacokinetic/pharmacodynamic model-based combination therapy approach to target antibiotic resistant populations emerged from ciprofloxacin exposure. <i>Die Pharmazie-An International Journal of Pharmaceutical Sciences</i> . 2010;65(6):417-420.                     | Title    |
| 124<br>3 | Tasso L, de Andrade C, Dalla Costa T. Pharmacokinetic/pharmacodynamic modelling of the bactericidal activity of free lung concentrations of levofloxacin and gatifloxacin against <i>Streptococcus pneumoniae</i> . <i>International journal of antimicrobial agents</i> . 2011;38(4):307-313. | Title    |
| 124<br>4 | Elhewaty MH. Pharmacokinetics and Bioavailability of cefotaxime in broiler chickens. <i>Egyptian Veterinary Medical Society of Parasitology Journal (EVMSPJ)</i> . 2019;15(1):130-139.                                                                                                         | Animal   |
| 124<br>5 | Peris-Ribera J-E, Torres-Molina F, Garcia-Carbonell MC, et al. Pharmacokinetics and bioavailability of diclofenac in the rat. <i>Journal of pharmacokinetics and biopharmaceutics</i> . 1991;19(6):647-665.                                                                                    | Animal   |
| 124<br>6 | Huang M, Zhao XL. Pharmacokinetics and bioavailability of oral cefixime in healthy adult volunteers [Journal: Article]. <i>Chinese pharmacological bulletin</i> . 1994;10(1):24-26.                                                                                                            | Abstract |
| 124<br>7 | Park YS, Woo SK, Jung MH, et al. Pharmacokinetics and bioavailability of oral cephalosporins, KR-984055 and its prodrugs, KR-999001 and KR-999002, in the rat. <i>Archives of pharmacal research</i> . 2003;26(1):83-88.                                                                       | Animal   |
| 124<br>8 | Valizadeh H, Hamishehkar H, Ghanbarzadeh S, et al. Pharmacokinetics and bioequivalence evaluation of two brands of ciprofloxacin 500 mg tablets in Iranian healthy volunteers. <i>Arzneimittelforschung</i> . 2012;62(12):566-570.                                                             | Title    |
| 124<br>9 | Lin J, Kan Z, Feng W. Pharmacokinetics and Bioequivalence of Cefixime Capsules in Human. <i>CHINESE JOURNAL OF PHARMACEUTICALS</i> . 2006;37(7):480.                                                                                                                                           | Abstract |
| 125<br>0 | Mudassar Ashraf M. Pharmacokinetics and Bioequivalence of Cefixime in Healthy Male and Female Volunteers: University of Agriculture, Faisalabad, Pakistan; 2015.                                                                                                                               | Abstract |

|          |                                                                                                                                                                                                                                         |          |
|----------|-----------------------------------------------------------------------------------------------------------------------------------------------------------------------------------------------------------------------------------------|----------|
| 125<br>1 | Yan Z, Jian-feng C, Ai-dong W. Pharmacokinetics and bioequivalence of cefixime suspension and granules. CHINESE JOURNAL OF ANTIBIOTICS. 2002;27(11):681-684.                                                                            | Title    |
| 125<br>2 | Lin P-P, Wang C-J, Liu Y-P, et al. Pharmacokinetics and Bioequivalence of Cefprozil for Suspension and Granule Formulation in Healthy Chinese Volunteers: Two Single-Dose Crossover Studies. Advances in Therapy. 2021;38(2):1130-1142. | Title    |
| 125<br>3 | Danafar H, Hamidi M. Pharmacokinetics and bioequivalence study of amlodipine and atorvastatin in healthy male volunteers by LC-MS. Pharmaceutical Sciences. 2015;21(3):167-174.                                                         | Title    |
| 125<br>4 | Wei M-j, Lv Y, Kang Z-s. Pharmacokinetics and bioequivalence study of cefixime tablet in healthy volunteers. CHINESE JOURNAL OF CLINICAL PHARMACOLOGY. 2004;20(1):41-44.                                                                | Abstract |
| 125<br>5 | Motohiro T, Handa S, Yamada S, et al. Pharmacokinetics and clinical effects of cefdinir 5% fine granules in pediatrics. The Japanese Journal of Antibiotics. 1990;43(10):1813-1835.                                                     | Title    |
| 125<br>6 | Motohiro T, Handa S, Yamada S, et al. Pharmacokinetics and clinical effects of cefdinir 10% fine granules in pediatrics. The Japanese Journal of Antibiotics. 1992;45(1):74-86.                                                         | Title    |
| 125<br>7 | Motohiro T, Tanaka K, Koga T, et al. Pharmacokinetics and clinical effects of cefixime in pediatrics. The Japanese Journal of Antibiotics. 1986;39(4):1177-1200.                                                                        | Title    |
| 125<br>8 | Lin C, Lim J, Radwanski E, et al. Pharmacokinetics and dose proportionality of ceftibuten in men. Antimicrobial agents and chemotherapy. 1995;39(2):359-361.                                                                            | Title    |
| 125<br>9 | O'Neill P, Nye K, Douce G, et al. Pharmacokinetics and inflammatory fluid penetration of cefpodoxime proxetil in volunteers. Antimicrobial agents and chemotherapy. 1990;34(2):232-234.                                                 | Title    |
| 126<br>0 | KULEMANN V, JOUKHADAR C. The pharmacokinetics and pharmacodynamics. Anaesthesia, Pain, Intensive Care and Emergency Medicine-APICE. 2005;19:177.                                                                                        | Title    |

|          |                                                                                                                                                                                                                                                      |          |
|----------|------------------------------------------------------------------------------------------------------------------------------------------------------------------------------------------------------------------------------------------------------|----------|
| 126<br>1 | Levison ME, Levison JH. Pharmacokinetics and pharmacodynamics of antibacterial agents. Infectious Disease Clinics. 2009;23(4):791-815.                                                                                                               | Title    |
| 126<br>2 | Craig WA, Andes D. Pharmacokinetics and pharmacodynamics of antibiotics in otitis media. The Pediatric infectious disease journal. 1996;15(3):255-259.                                                                                               | Title    |
| 126<br>3 | Kulemann V, Joukhadar C. The pharmacokinetics and pharmacodynamics of antimicrobial agents in intensive care unit patients as assessed by microdialysis. Anaesthesia, Pain, Intensive Care and Emergency Medicine—APICE: Springer; 2005. p. 177-183. | Title    |
| 126<br>4 | Czock D, Markert C, Hartman B, et al. Pharmacokinetics and pharmacodynamics of antimicrobial drugs. Expert opinion on drug metabolism & toxicology. 2009;5(5):475-487.                                                                               | Title    |
| 126<br>5 | Liu P. Pharmacokinetics and pharmacodynamics of cefpodoxime and cefixime. University of Florida; 2002.                                                                                                                                               | Abstract |
| 126<br>6 | Lutsar I, Friedland IR. Pharmacokinetics and pharmacodynamics of cephalosporins in cerebrospinal fluid. Clinical pharmacokinetics. 2000;39(5):335-343.                                                                                               | Abstract |
| 126<br>7 | Cazzola M, Matera M, Donner C. Pharmacokinetics and pharmacodynamics of newer oral cephalosporins. Clinical drug investigation. 1998;16(4):335-346.                                                                                                  | Abstract |
| 126<br>8 | Novelli A, Fallani S, Cassetta M, et al. Pharmacokinetics and pharmacodynamics of oral cephalosporins as critical factors in choice of antibiotics. International journal of antimicrobial agents. 2000;16(4):501-505.                               | Abstract |
| 126<br>9 | Auckenthaler R. Pharmacokinetics and pharmacodynamics of oral $\beta$ -lactam antibiotics as a two-dimensional approach to their efficacy. Journal of Antimicrobial Chemotherapy. 2002;50(suppl_1):13-17.                                            | Title    |
| 127<br>0 | Gure-Klinke H, Hamacher J, Lode H. Pharmacokinetics and possible interactions of Cefixime with N-Acetylcysteine in healthy volunteers [Journal: Article]. Chemotherapie journal. 1996;5(1):12-16.                                                    | Abstract |

|          |                                                                                                                                                                                                                                                                                                     |          |
|----------|-----------------------------------------------------------------------------------------------------------------------------------------------------------------------------------------------------------------------------------------------------------------------------------------------------|----------|
| 127<br>1 | Zhang YC, Li MM, Sui XH, et al. Pharmacokinetics and relative bioavailability of cefixime capsules in healthy volunteers [Journal: Article]. <i>Pharmaceutical care and research</i> . 2008;8(6):429-431.                                                                                           | Abstract |
| 127<br>2 | Martin C, Ragni J, Lokiec F, et al. Pharmacokinetics and tissue penetration of a single dose of ceftriaxone (1,000 milligrams intravenously) for antibiotic prophylaxis in thoracic surgery. <i>Antimicrobial agents and chemotherapy</i> . 1992;36(12):2804-2807.                                  | Title    |
| 127<br>3 | Wise R, Nye K, O'Neill P, et al. Pharmacokinetics and tissue penetration of ceftibuten. <i>Antimicrobial agents and chemotherapy</i> . 1990;34(6):1053-1055.                                                                                                                                        | Title    |
| 127<br>4 | Sullins AK, Abdel-Rahman SM. Pharmacokinetics of antibacterial agents in the CSF of children and adolescents. <i>Pediatric Drugs</i> . 2013;15(2):93-117.                                                                                                                                           | Title    |
| 127<br>5 | Cruciani M, Gatti G, Cazzadori A, et al. Pharmacokinetics of antimicrobial agents in the respiratory tract. <i>Zentralblatt für Bakteriologie</i> . 1996 1996/06/01/;284(1):1-31.                                                                                                                   | Title    |
| 127<br>6 | Stevens RC, Rodman JH, editors. <i>Pharmacokinetics of antimicrobial therapy</i> . <i>Seminars in Pediatric Infectious Diseases</i> ; 1998: Elsevier.                                                                                                                                               | Title    |
| 127<br>7 | Nahata MC. Pharmacokinetics of azithromycin in pediatric patients: comparison with other agents used for treating otitis media and streptococcal pharyngitis. <i>The Pediatric infectious disease journal</i> . 1995;14(4):S39-44.                                                                  | Title    |
| 127<br>8 | Whited L, Grove M, Rose D, et al. Pharmacokinetics of cefepime in patients with cancer and febrile neutropenia in the setting of hematologic malignancies or hematopoietic cell transplantation. <i>Pharmacotherapy: The Journal of Human Pharmacology and Drug Therapy</i> . 2016;36(9):1003-1010. | Title    |
| 127<br>9 | Zimmerli W, Sansano S, Wittke B. Pharmacokinetics of cefetamet in plasma and skin blister fluid. <i>Antimicrobial agents and chemotherapy</i> . 1996;40(1):102-104.                                                                                                                                 | Title    |

|          |                                                                                                                                                                                                                                               |                   |
|----------|-----------------------------------------------------------------------------------------------------------------------------------------------------------------------------------------------------------------------------------------------|-------------------|
| 128<br>0 | Montay G, Le Liboux A, Thebault J, et al. Pharmacokinetics of cefixime in healthy volunteers after a single oral administration of 200 mg. Presse Medicale (Paris, France: 1983). 1989;18(32):1583-1586.                                      | Not<br>Accessible |
| 128<br>1 | Maeda H, Sako M, Fujii A, et al. Pharmacokinetics of cefixime in patients with impaired renal function. The Japanese Journal of Antibiotics. 1986;39(10):2716-2720.                                                                           | Abstract          |
| 128<br>2 | Nakano H, Seko S, Nihira H, et al. Pharmacokinetics of cefixime in patients with impaired renal function by repeated-dose study. Chemotherapy. 1988;36(5):428-436.                                                                            | Abstract          |
| 128<br>3 | König S, Marre R, Schulz E, et al. The pharmacokinetics of cefixime in patients with renal insufficiency undergoing hemofiltration. Journal of chemotherapy (Florence, Italy). 1989;1(4 Suppl):536-537.                                       | Not<br>Accessible |
| 128<br>4 | Zhang Y, Sun Z, Li Q. Pharmacokinetics of cefixime in patients with respiratory tract infections. CHINESE PHARMACEUTICAL JOURNAL-BEIJING-. 1995;30:612-614.                                                                                   | Abstract          |
| 128<br>5 | KREFT B, BOEKSTEGERS S, SCHULZ E, et al. PHARMACOKINETICS OF CEFIXIME IN SEVERE RENAL-INSUFFICIENCY AND PATIENTS UNDERGOING HEMOFILTRATION. NIEREN-UND HOCHDRUCKKRANKHEITEN. 1990;19(8):344-348.                                              | Abstract          |
| 128<br>6 | Greene D, Anslow J, Bohaychuk W, et al., editors. Pharmacokinetics of cefixime in the fed and fasted state. Workshop, 15th International Congress of Chemotherapy, July, 1987. Advances in Experimental and Clinical Chemotherapy 1988; 1988. | Title             |
| 128<br>7 | Grassi GG, Bandera M, Bianchi L, et al. Pharmacokinetics of cefixime in the respiratory tract. Journal of Chemotherapy. 1991;3:216-218.                                                                                                       | Abstract          |
| 128<br>8 | Kees F, Naber K. Pharmacokinetics of cefixime in volunteers and a literature comparison with the new ester prodrug cephalosporins. Infection. 1990;18:S150-4.                                                                                 | Title             |

|          |                                                                                                                                                                                                                                |        |
|----------|--------------------------------------------------------------------------------------------------------------------------------------------------------------------------------------------------------------------------------|--------|
| 128<br>9 | Silber D, Bohaychuk W, Stout M. Pharmacokinetics of cefixime in young and elderly volunteers. Workshop. 15th International Congress of Chemotherapy, Jul 87. Advances in Experimental and Clinical Chemotherapy. 1988;1:18-20. | Title  |
| 129<br>0 | Saathoff N, Lode H, Neider K, et al. Pharmacokinetics of cefpodoxime proxetil and interactions with an antacid and an H2 receptor antagonist. Antimicrobial agents and chemotherapy. 1992;36(4):796-800.                       | Title  |
| 129<br>1 | Shyu W, Pittman K, Wilber R, et al. Pharmacokinetics of cefprozil in healthy subjects and patients with renal impairment. The Journal of Clinical Pharmacology. 1991;31(4):362-371.                                            | Title  |
| 129<br>2 | Barr WH, Lin C-C, Radwanski E, et al. The pharmacokinetics of ceftibuten in humans. Diagnostic microbiology and infectious disease. 1991;14(1):93-100.                                                                         | Title  |
| 129<br>3 | Gergs U, Clauss T, Ihlefeld D, et al. Pharmacokinetics of ceftriaxone in plasma and bone of patients undergoing hip or knee surgery. Journal of Pharmacy and Pharmacology. 2014;66(11):1552-1558.                              | Title  |
| 129<br>4 | Sakamoto H, Hirose T, Mine Y. Pharmacokinetics of FK027 in rats and dogs. J Antibiot (Tokyo). 1985 Apr;38(4):496-504.                                                                                                          | Animal |
| 129<br>5 | Sakamoto H, Hirose T, Nakamoto S, et al. Pharmacokinetics of FK482, a new orally active cephalosporin, in animals. The Journal of antibiotics. 1988;41(12):1896-1905.                                                          | Animal |
| 129<br>6 | Ammoo AM, Al-Tamimi DJJ, Al-Mahroos MIA, et al. Pharmacokinetics of Fluconazole tablets administered to healthy subjects. Journal of Advanced Pharmacy Education & Research  Apr-Jun. 2021;11(2):93.                           | Title  |
| 129<br>7 | Stoeckel K. Pharmacokinetics of intravenous cefetamet and oral cefetamet pivoxil in human subjects. Drug Investigation. 1991;3(5):291-298.                                                                                     | Title  |
| 129<br>8 | Kneer J, Tam Y, Blouin R, et al. Pharmacokinetics of intravenous cefetamet and oral cefetamet pivoxil in patients with renal insufficiency. Antimicrobial agents and chemotherapy. 1989;33(11):1952-1957.                      | Title  |

|          |                                                                                                                                                                                                                                      |          |
|----------|--------------------------------------------------------------------------------------------------------------------------------------------------------------------------------------------------------------------------------------|----------|
| 129<br>9 | Roller S, Lode H, Stelzer I, et al. Pharmacokinetics of loracarbef and interaction with acetylcysteine. European Journal of Clinical Microbiology and Infectious Diseases. 1992;11(9):851-855.                                       | Title    |
| 130<br>0 | Edwards DJ, Stoeckel K. The pharmacokinetics of new oral cephalosporins in children. Chemotherapy. 1992;38(Suppl. 2):2-9.                                                                                                            | Abstract |
| 130<br>1 | Fassbender M, Lode H, Schaberg T, et al. Pharmacokinetics of new oral cephalosporins, including a new carbacephem. Clinical infectious diseases. 1993;16(5):646-653.                                                                 | Abstract |
| 130<br>2 | Fillastre J-P, Singlas E. Pharmacokinetics of newer drugs in patients with renal impairment (Part I). Clinical pharmacokinetics. 1991;20(4):293-310.                                                                                 | Title    |
| 130<br>3 | Stoeckel K, Tarn Y, Kneer J. Pharmacokinetics of oral cefetamet pivoxil (Ro 15-8075) and intravenous cefetamet (Ro 15-8074) in humans: a review. Current medical research and opinion. 1989;11(7):432-441.                           | Title    |
| 130<br>4 | Mazzei T, Dentico P. The pharmacokinetics of oral cephalosporins. Clinical Microbiology and Infection. 2000 2000/01/01;6:53-54.                                                                                                      | Abstract |
| 130<br>5 | Wise R. The pharmacokinetics of the oral cephalosporins--a review. J Antimicrob Chemother. 1990 Dec;26 Suppl E:13-20.                                                                                                                | Title    |
| 130<br>6 | Alshare M. PHARMACOKINETICS OF THIRD GENERATION CEPHALOSPORINS IN CHILDEN WITH TYPHOID FEVER: University of Karachi; 2001.                                                                                                           | Abstract |
| 130<br>7 | Smith PW, Zuccotto F, Bates RH, et al. Pharmacokinetics of $\beta$ -lactam antibiotics: clues from the past to help discover long-acting oral drugs in the future. ACS infectious diseases. 2018;4(10):1439-1447.                    | Title    |
| 130<br>8 | Papich MG, Davis JL, Floerchinger AM. Pharmacokinetics, protein binding, and tissue distribution of orally administered cefpodoxime proxetil and cephalexin in dogs. American journal of veterinary research. 2010;71(12):1484-1491. | Animal   |

|      |                                                                                                                                                                                                                                                                                                  |       |
|------|--------------------------------------------------------------------------------------------------------------------------------------------------------------------------------------------------------------------------------------------------------------------------------------------------|-------|
| 1309 | Lees A, Andrews J, Wise R. The pharmacokinetics, tissue penetration and in-vitro activity of loracarbef, a $\beta$ -lactam antibiotic of the carbacephem class. <i>Journal of Antimicrobial Chemotherapy</i> . 1993;32(6):853-859.                                                               | Title |
| 1310 | Roe VA, Gudi A. Pharmacologic management of sexually transmitted diseases. <i>Journal of Nurse-Midwifery</i> . 1997 1997/05/06/;42(3):275-289.                                                                                                                                                   | Title |
| 1311 | Barriere SL. Pharmacology and pharmacokinetics of cefprozil. <i>Clinical infectious diseases</i> . 1992;14(Supplement_2):S184-S188.                                                                                                                                                              | Title |
| 1312 | Thoene DE, Johnson CE. Pharmacotherapy of otitis media. <i>Pharmacotherapy: The Journal of Human Pharmacology and Drug Therapy</i> . 1991;11(3):212-221.                                                                                                                                         | Title |
| 1313 | Kees F, Naber K. Pharmakokinetik von Cefixim bei Probanden und ein Literaturvergleich mit neuen Ester Prodrug Cephalosporinen. <i>Infection</i> . 1990;18(3):S150-S154.                                                                                                                          | Title |
| 1314 | Barry B, Muffat-Joly M, Géhanno P. Pharrnacokinetics of antibiotics in the middle ear. <i>Clinical Microbiology and Infection</i> . 1997 1997/01/01/;3:3S37-3S42.                                                                                                                                | Title |
| 1315 | Trippett TM, Herzog C, Whitlock JA, et al. Phase I and pharmacokinetic study of cetuximab and irinotecan in children with refractory solid tumors: a study of the pediatric oncology experimental therapeutic investigators' consortium. <i>Journal of clinical oncology</i> . 2009;27(30):5102. | Title |
| 1316 | Nakashima M, Uematsu T, Takiguchi Y, et al. Phase I clinical studies of 7432-S, a new oral cephalosporin: safety and pharmacokinetics. <i>The Journal of Clinical Pharmacology</i> . 1988;28(3):246-252.                                                                                         | Title |
| 1317 | Brennan R, Furman W, Mao S, et al. Phase I dose escalation and pharmacokinetic study of oral gefitinib and irinotecan in children with refractory solid tumors. <i>Cancer chemotherapy and pharmacology</i> . 2014;74(6):1191-1198.                                                              | Title |



|          |                                                                                                                                                                                                                                                                                                                                |          |
|----------|--------------------------------------------------------------------------------------------------------------------------------------------------------------------------------------------------------------------------------------------------------------------------------------------------------------------------------|----------|
| 131<br>8 | Perentesis J, Wagner L, Ames M, et al. Phase I study of oral irinotecan, temozolomide, and vincristine for children with refractory solid tumors: A Children's Oncology Group study. <i>Journal of Clinical Oncology</i> . 2007;25(18_suppl):9563-9563.                                                                        | Title    |
| 131<br>9 | Wagner L, Perentesis J, Reid J, et al. Phase I trial and pharmacokinetic study of two schedules of vincristine, oral irinotecan, and temozolomide (VOIT) for children with refractory solid tumors: A Children's Oncology Group Phase I Consortium study. <i>Journal of Clinical Oncology</i> . 2009;27(15_suppl):10017-10017. | Title    |
| 132<br>0 | Wagner LM, Villablanca JG, Stewart CF, et al. Phase I trial of oral irinotecan and temozolomide for children with relapsed high-risk neuroblastoma: a new approach to neuroblastoma therapy consortium study. <i>Journal of clinical oncology</i> . 2009;27(8):1290.                                                           | Title    |
| 132<br>1 | Wagner LM, Perentesis JP, Reid JM, et al. Phase I trial of two schedules of vincristine, oral irinotecan, and temozolomide (VOIT) for children with relapsed or refractory solid tumors: a Children's Oncology Group phase I consortium study. <i>Pediatric blood &amp; cancer</i> . 2010;54(4):538-545.                       | Title    |
| 132<br>2 | Taylor MM, Kara EO, Araujo MAL, et al. Phase II trial evaluating the clinical efficacy of cefixime for treatment of active syphilis in non-pregnant women in Brazil (CeBra). <i>BMC Infectious Diseases</i> . 2020;20(1):1-15.                                                                                                 | Abstract |
| 132<br>3 | Jeverica S, Golparian D, Matičič M, et al. Phenotypic and molecular characterization of <i>Neisseria gonorrhoeae</i> isolates from Slovenia, 2006-12: rise and fall of the multidrug-resistant NG-MAST genogroup 1407 clone? <i>J Antimicrob Chemother</i> . 2014 Jun;69(6):1517-25.                                           | Title    |
| 132<br>4 | Pourtaheri A, Nezamzadeh-Ejehieh A. Photocatalytic properties of incorporated NiO onto clinoptilolite nanoparticles in the photodegradation process of aqueous solution of cefixime pharmaceutical capsule. <i>Chemical Engineering Research and Design</i> . 2015;104:835-843.                                                | Abstract |

|          |                                                                                                                                                                                                                                                                   |          |
|----------|-------------------------------------------------------------------------------------------------------------------------------------------------------------------------------------------------------------------------------------------------------------------|----------|
| 132<br>5 | Jadhav P, Petkar B, Pore Y, et al. Physicochemical and molecular modeling studies of cefixime–l-arginine–cyclodextrin ternary inclusion compounds. Carbohydrate polymers. 2013;98(2):1317-1325.                                                                   | Abstract |
| 132<br>6 | Raddam QN. Physiological Changes of Some Biochemical Parameters in Blood, Liver and Kidney Result by used Antibiotic Cefixime. Annals of the Romanian Society for Cell Biology. 2021;25(6):8257-8263.                                                             | Abstract |
| 132<br>7 | Stader F, Kinvig H, Penny MA, et al. Physiologically based pharmacokinetic modelling to identify pharmacokinetic parameters driving drug exposure changes in the elderly. Clinical pharmacokinetics. 2020;59(3):383-401.                                          | Title    |
| 132<br>8 | Kamiya Y, Otsuka S, Miura T, et al. Physiologically based pharmacokinetic models predicting renal and hepatic concentrations of industrial chemicals after virtual oral doses in rats. Chemical research in toxicology. 2020;33(7):1736-1751.                     | Animal   |
| 132<br>9 | Turpault S, Kanamaluru V, Lockwood G, et al. PI-64: Lack of effect of rimonabant on the pharmacokinetic of nicotine. Clinical Pharmacology & Therapeutics. 2006;79(2):P24-P24.                                                                                    | Title    |
| 133<br>0 | Miller J, Migoya E, Talaty J, et al. PI-65: The effect of MK-0431 on the pharmacokinetics of digoxin after concomitant administration for 10 days in healthy subjects. Clinical Pharmacology & Therapeutics. 2006;79(2):P24-P24.                                  | Title    |
| 133<br>1 | Nallani S, Coles L. PI-66: A repository of clinical pharmacokinetics data for drugs used in pregnancy and lactation developed at FDA. Clinical Pharmacology & Therapeutics. 2006;79(2):P24-P24.                                                                   | Title    |
| 133<br>2 | Cui Y, Zhou Y, Sun P, et al. PI-67: Population pharmacokinetics of cefixime in Chinese male healthy subjects. Clinical Pharmacology & Therapeutics. 2006;79(2):P24-P24.                                                                                           | Abstract |
| 133<br>3 | Jprn U. Pilot study of gefitinib and irinotecan in young patients With Relapsed or Refractory Cancer. <a href="https://trialssearchwho.int/Trial2.aspx?TrialID=JPRN-UMIN000001730">https://trialssearchwho.int/Trial2.aspx?TrialID=JPRN-UMIN000001730</a> . 2009. | Title    |

|          |                                                                                                                                                                                                                                                       |       |
|----------|-------------------------------------------------------------------------------------------------------------------------------------------------------------------------------------------------------------------------------------------------------|-------|
| 133<br>4 | Winchester JF. Poisoning: Is the Role of the Nephrologist Diminishing? American Journal of Kidney Diseases. 1989 1989/03/01/;13(3):171-183.                                                                                                           | Title |
| 133<br>5 | Toscanini MA, Limeres MJ, Garrido AV, et al. Polymeric micelles and nanomedicines: Shaping the future of next generation therapeutic strategies for infectious diseases. Journal of Drug Delivery Science and Technology. 2021 2021/12/01/;66:102927. | Title |
| 133<br>6 | Jeong S-H, Jang J-H, Cho H-Y, et al. Population pharmacokinetic analysis of cefaclor in healthy Korean subjects. Pharmaceutics. 2021;13(5):754.                                                                                                       | Title |
| 133<br>7 | Amsden GW, Ballow CH, Schentag JJ. Population pharmacokinetic methods to optimise antibiotic effects. Drug Investigation. 1993;5(5):256-268.                                                                                                          | Title |
| 133<br>8 | Poster presentations. International Journal of Antimicrobial Agents. 2017 2017/09/01/;50:S87-S169.                                                                                                                                                    | Title |
| 133<br>9 | POSTER PRESENTATIONS: FRIDAY, NOVEMBER 8. Chest. 1991 1991/08/01/;100(2, Supplement):137S-150S.                                                                                                                                                       | Title |
| 134<br>0 | Poster Sessions. International Journal of Antimicrobial Agents. 2017 2017/11/01/;50:S69-S277.                                                                                                                                                         | Title |
| 134<br>1 | Posters. Clinical Microbiology and Infection. 2010 2010/04/01/;16:S133-S634.                                                                                                                                                                          | Title |
| 134<br>2 | Posters. Clinical Microbiology and Infection. 2011 2011/05/01/;17:S108-S668.                                                                                                                                                                          | Title |
| 134<br>3 | Flanagan T. Potential for pharmaceutical excipients to impact absorption: A mechanistic review for BCS Class 1 and 3 drugs. European Journal of Pharmaceutics and Biopharmaceutics. 2019 2019/08/01/;141:130-138.                                     | Title |

|          |                                                                                                                                                                                                                                                                    |        |
|----------|--------------------------------------------------------------------------------------------------------------------------------------------------------------------------------------------------------------------------------------------------------------------|--------|
| 134<br>4 | Mutalib AAA, Jaafar NF. Potential of deep eutectic solvent in photocatalyst fabrication methods for water pollutant degradation: A review. <i>Journal of Environmental Chemical Engineering</i> . 2022<br>2022/06/01/;10(3):107422.                                | Title  |
| 134<br>5 | Broyles AD, Banerji A, Barmettler S, et al. Practical Guidance for the Evaluation and Management of Drug Hypersensitivity: Specific Drugs. <i>The Journal of Allergy and Clinical Immunology: In Practice</i> . 2020<br>2020/10/01/;8(9, Supplement):S16-S116.     | Title  |
| 134<br>6 | Fick J, Lindberg RH, Tysklind M, et al. Predicted critical environmental concentrations for 500 pharmaceuticals. <i>Regulatory Toxicology and Pharmacology</i> . 2010 2010/12/01/;58(3):516-523.                                                                   | Title  |
| 134<br>7 | van Os W, Zeitlinger M. Predicting antimicrobial activity at the target site: pharmacokinetic/pharmacodynamic indices versus time–kill approaches. <i>Antibiotics</i> . 2021;10(12):1485.                                                                          | Title  |
| 134<br>8 | Nielsen EI, Cars O, Friberg LE. Predicting in vitro antibacterial efficacy across experimental designs with a semimechanistic pharmacokinetic-pharmacodynamic model. <i>Antimicrobial agents and chemotherapy</i> . 2011;55(4):1571-1579.                          | Title  |
| 134<br>9 | Yang X, Gandhi YA, Duignan DB, et al. Prediction of biliary excretion in rats and humans using molecular weight and quantitative structure–pharmacokinetic relationships. <i>The AAPS journal</i> . 2009;11(3):511-525.                                            | Animal |
| 135<br>0 | Wajima T, Fukumura K, Yano Y, et al. Prediction of human pharmacokinetics from animal data and molecular structural parameters using multivariate regression analysis: oral clearance. <i>Journal of pharmaceutical sciences</i> . 2003;92(12):2427-2440.          | Animal |
| 135<br>1 | Paixão P, Gouveia LF, Morais JAG. Prediction of the human oral bioavailability by using in vitro and in silico drug related parameters in a physiologically based absorption model. <i>International Journal of Pharmaceutics</i> . 2012 2012/06/15/;429(1):84-98. | Title  |

|          |                                                                                                                                                                                                                                                                      |          |
|----------|----------------------------------------------------------------------------------------------------------------------------------------------------------------------------------------------------------------------------------------------------------------------|----------|
| 135<br>2 | Paixão P, Gouveia LF, Morais JAG. Prediction of the in vitro intrinsic clearance determined in suspensions of human hepatocytes by using artificial neural networks. <i>European Journal of Pharmaceutical Sciences</i> . 2010 2010/03/18/;39(5):310-321.            | Title    |
| 135<br>3 | MacLeod CL. The pregnant traveler. <i>Medical Clinics of North America</i> . 1992 1992/11/01/;76(6):1313-1326.                                                                                                                                                       | Title    |
| 135<br>4 | Jones RN, Barry AL. Preliminary antimicrobial susceptibility interpretive criteria for cefetamet (Ro 15-8074) and ceftoram (Ro 19-5247) disk tests. <i>Journal of clinical microbiology</i> . 1987;25(9):1796-1799.                                                  | Title    |
| 135<br>5 | Ali I, Rehman JU, Ullah S, et al. Preliminary investigation of novel tetra-tailed macrocycle amphiphile based nano-vesicles for amphotericin B improved oral pharmacokinetics. <i>Artificial Cells, Nanomedicine, and Biotechnology</i> . 2018;46(sup3):S1204-S1214. | Title    |
| 135<br>6 | Shirvany A, Rezayan AH, Alvandi H, et al. Preparation and Evaluation of a Niosomal Drug Delivery System Containing Cefazolin and Study of Its Antibacterial Activity. <i>Iranian Journal of Medical Microbiology</i> . 2021;15(6):638-657.                           | Title    |
| 135<br>7 | rights are reserved by MUDER A, HAYDER A. Preparation and Evaluation of Cefixime Dispersible Tablets Using Co-Processed Excipients.                                                                                                                                  | Abstract |
| 135<br>8 | Talaat HM, Aydia MI, Ibrahim IT, et al. Preparation of <sup>186</sup> Re-Cefixime as a potential diagnostic and therapeutic agent for bacterial infection. <i>Egyptian Journal of Radiation Sciences and Applications</i> . 2019;32(1):95-103.                       | Abstract |
| 135<br>9 | Stauffer W, Christenson JC, Fischer PR. Preparing children for international travel. <i>Travel Medicine and Infectious Disease</i> . 2008 2008/05/01/;6(3):101-113.                                                                                                  | Title    |
| 136<br>0 | Barbee LA. Preparing for an era of untreatable gonorrhoea. <i>Current opinion in infectious diseases</i> . 2014;27(3):282.                                                                                                                                           | Title    |

|          |                                                                                                                                                                                                                                                                              |          |
|----------|------------------------------------------------------------------------------------------------------------------------------------------------------------------------------------------------------------------------------------------------------------------------------|----------|
| 136<br>1 | Chachaty E, Depitre C, Mario N, et al. Presence of Clostridium difficile and antibiotic and beta-lactamase activities in feces of volunteers treated with oral cefixime, oral cefpodoxime proxetil, or placebo. Antimicrobial agents and chemotherapy. 1992;36(9):2009-2013. | Abstract |
| 136<br>2 | Bottoni P, Caroli S. Presence of residues and metabolites of pharmaceuticals in environmental compartments, food commodities and workplaces: A review spanning the three-year period 2014–2016. Microchemical Journal. 2018 2018/01/01/;136:2-24.                            | Title    |
| 136<br>3 | Wu B, Sy SK, Derendorf H. Principles of applied pharmacokinetic–pharmacodynamic modeling. Fundamentals of antimicrobial pharmacokinetics and pharmacodynamics: Springer; 2014. p. 63-79.                                                                                     | Title    |
| 136<br>4 | Blowey D. Principles of drug administration in children receiving renal replacement therapy. Pediatric dialysis: Springer; 2004. p. 545-565.                                                                                                                                 | Title    |
| 136<br>5 | Sabella C, Goldfarb J. Principles of selection and use of antimicrobial agents. Seminars in Pediatric Infectious Diseases. 1999 1999/01/01/;10(1):3-13.                                                                                                                      | Title    |
| 136<br>6 | Pichichero ME, Doern GV, Kuti JL, et al. Probability of achieving requisite pharmacodynamic exposure for oral beta-lactam regimens against Haemophilus influenzae in children. Paediatr Drugs. 2008;10(6):391-7.                                                             | Title    |
| 136<br>7 | Jana S, Mandlekar S, Marathe P. Prodrug design to improve pharmacokinetic and drug delivery properties: challenges to the discovery scientists. Current medicinal chemistry. 2010;17(32):3874-3908.                                                                          | Title    |
| 136<br>8 | Powers JL. Properties of azithromycin that enhance the potential for compliance in children with upper respiratory tract infections. The Pediatric infectious disease journal. 1996;15(9):30-37.                                                                             | Title    |
| 136<br>9 | Team S. PROPOSAL FOR THE INCLUSION OF CEFIXIME IN THE WHO MODEL LIST OF ESSENTIAL MEDICINES. 2004.                                                                                                                                                                           | Abstract |

|          |                                                                                                                                                                                                                                                                |                |
|----------|----------------------------------------------------------------------------------------------------------------------------------------------------------------------------------------------------------------------------------------------------------------|----------------|
| 137<br>0 | Pipitpanpipit T, Santanirand P, Kongchareonsombat W. Prospective Randomized Controlled Study of the Results of Me-dication with Oral Ciprofloxacin versus Oralcefixime to Prevent Transient Bacteraemia and Adverse Events from Trans-Rectal Prostatic Biopsy. | Title          |
| 137<br>1 | Smith DE, Cl  men  on B, Hediger MA. Proton-coupled oligopeptide transporter family SLC15: Physiological, pharmacological and pathological implications. <i>Molecular Aspects of Medicine</i> . 2013 2013/04/01/;34(2):323-336.                                | Title          |
| 137<br>2 | Grellet J, Couraud L, Saux M, et al. Pulmonary diffusion of cefixime in man. <i>Presse Medicale (Paris, France: 1983)</i> . 1989;18(32):1589-1592.                                                                                                             | Not Accessible |
| 137<br>3 | Kiang TK, Ensom MH. A qualitative review on the pharmacokinetics of antibiotics in saliva: implications on clinical pharmacokinetic monitoring in humans. <i>Clinical pharmacokinetics</i> . 2016;55(3):313-358.                                               | Title          |
| 137<br>4 | Azmi SNH, Iqbal B, Al-Humaimi NSH, et al. Quantitative analysis of cefixime via complexation with palladium (II) in pharmaceutical formulations by spectrophotometry. <i>Journal of pharmaceutical analysis</i> . 2013;3(4):248-256.                           | Abstract       |
| 137<br>5 | Shimizu R, Sukegawa T, Tsuda Y, et al. Quantitative prediction of oral absorption of PEPT1 substrates based on in vitro uptake into Caco-2 cells. <i>Int J Pharm</i> . 2008 Apr 16;354(1-2):104-10.                                                            | Title          |
| 137<br>6 | Grover A, Grover M, Sharma K. Quantitative structure property relationship studies for predicting plasma protein binding properties of Cephalosporins.                                                                                                         | Abstract       |
| 137<br>7 | Karalis V, Tsantili-Kakoulidou A, Macheras P. Quantitative structure–pharmacokinetic relationships for disposition parameters of cephalosporins. <i>European journal of pharmaceutical sciences</i> . 2003;20(1):115-123.                                      | Abstract       |
| 137<br>8 | Zhivkova Z, Doytchinova I. Quantitative structure—plasma protein binding relationships of acidic drugs. <i>Journal of Pharmaceutical Sciences</i> . 2012 2012/12/01/;101(12):4627-4641.                                                                        | Title          |

|      |                                                                                                                                                                                                                                                                         |                   |
|------|-------------------------------------------------------------------------------------------------------------------------------------------------------------------------------------------------------------------------------------------------------------------------|-------------------|
| 1379 | Danafar H. A quick and easy high performance liquid chromatography method for evaluation of cefixime in human plasma. <i>Pharmaceutical and Biomedical Research</i> . 2015;1(4):29-39.                                                                                  | Abstract          |
| 1380 | Capoor MR, Nair D. Quinolone and cephalosporin resistance in enteric fever. <i>Journal of global infectious diseases</i> . 2010;2(3):258.                                                                                                                               | Abstract          |
| 1381 | Christian JS. The quinolone antibiotics. <i>Primary Care Update for OB/GYNS</i> . 1996 1996/05/01/;3(3):87-92.                                                                                                                                                          | Title             |
| 1382 | Suh B, Lorber B. Quinolones. <i>Medical Clinics of North America</i> . 1995 1995/01/01/;79(4):869-894.                                                                                                                                                                  | Title             |
| 1383 | R1885 – R2270. <i>Clinical Microbiology and Infection</i> . 2006 2006/01/01/;12:S635-S767.                                                                                                                                                                              | Title             |
| 1384 | Nathwani D. Ramirez and colleagues <sup>1</sup> recently reported the reduction in hospital stay and efficacy of an early. <i>Pharmacoeconomics</i> . 1994;5(2):S27-S33.                                                                                                | Title             |
| 1385 | Vergheze A, Roberson D, Kalbfleisch J, et al. Randomized comparative study of cefixime versus cephalexin in acute bacterial exacerbations of chronic bronchitis. <i>Antimicrobial Agents and Chemotherapy</i> . 1990;34(6):1041-1044.                                   | Abstract          |
| 1386 | Basualdo W, Arbo A. Randomized comparison of azithromycin versus cefixime for treatment of shigellosis in children [Clinical Trial; Comparative Study; Journal Article; Randomized Controlled Trial]. <i>Pediatric infectious disease journal</i> . 2003;22(4):374-377. | Extensive reading |
| 1387 | Zhao C, Li J, Hao F. [A randomized controlled clinical study of cefetamet pivoxil versus cefixime in the treatment of 99 cases bacterial infections]. <i>Zhonghua Nei Ke Za Zhi</i> . 1997 Jul;36(7):465-8.                                                             | Not Accessible    |



|          |                                                                                                                                                                                                                                                                                                                                                      |          |
|----------|------------------------------------------------------------------------------------------------------------------------------------------------------------------------------------------------------------------------------------------------------------------------------------------------------------------------------------------------------|----------|
| 138<br>8 | Nguyen PTT, Pham HV, Van DH, et al. Randomized controlled trial of the relative efficacy of high-dose intravenous ceftriaxone and oral cefixime combined with doxycycline for the treatment of Chlamydia trachomatis and Neisseria gonorrhoeae co-infection. BMC Infect Dis. 2022 Jul 9;22(1):607.                                                   | Abstract |
| 138<br>9 | Salam M, Khan WA, Bennish ML. Randomized double-blind study of efficacy of cefixime in the treatment of Shigellosis. 1992.                                                                                                                                                                                                                           | Abstract |
| 139<br>0 | Ramus RM, Sheffield JS, Mayfield JA, et al. A randomized trial that compared oral cefixime and intramuscular ceftriaxone for the treatment of gonorrhea in pregnancy [Clinical Trial; Comparative Study; Journal Article; Randomized Controlled Trial]. American journal of obstetrics and gynecology. 2001;185(3):629-632.                          | Abstract |
| 139<br>1 | Bucko AD, Hunt BJ, Kidd SL, et al. Randomized, double-blind, multicenter comparison of oral cefditoren 200 or 400 mg BID with either cefuroxime 250 mg BID or cefadroxil 500 mg BID for the treatment of uncomplicated skin and skin-structure infections. Clinical Therapeutics. 2002 2002/07/01/;24(7):1134-1147.                                  | Title    |
| 139<br>2 | Al-Shathar AI, Aziz SH. A randomized, single dose, two treatment, two period, crossover bioequivalence study of cefixime (as trihydrate) suspension in healthy participants comparing Acacime® suspension produced by ACAI/Iraq to Suprax® suspension produced by Hikma/Jordan. Al Mustansiriyah Journal of Pharmaceutical Sciences. 2017;17(1):7-7. | Abstract |
| 139<br>3 | Asadollahi-Baboli M, Mani-Varnosfaderani A. Rapid and simultaneous determination of tetracycline and cefixime antibiotics by mean of gold nanoparticles-screen printed gold electrode and chemometrics tools. Measurement. 2014;47:145-149.                                                                                                          | Abstract |
| 139<br>4 | Hoppe JE. Rational prescribing of antibacterials in ambulatory children. Pharmacoeconomics. 1996;10(6):552-574.                                                                                                                                                                                                                                      | Title    |

|          |                                                                                                                                                                                                                                              |                |
|----------|----------------------------------------------------------------------------------------------------------------------------------------------------------------------------------------------------------------------------------------------|----------------|
| 139<br>5 | File TM, Hadley JA. Rational use of antibiotics to treat respiratory tract infections. American journal of managed care. 2002;8(8):713-729.                                                                                                  | Title          |
| 139<br>6 | Craig W. Re-evaluating current antibiotic therapy. Respiratory Medicine. 2001;95:S12-S19.                                                                                                                                                    | Title          |
| 139<br>7 | [Re-evaluation of current antimicrobials. Series 21: cefixime. Discussion]. Jpn J Antibiot. 1994 Nov;47(11):1449-56.                                                                                                                         | Not Accessible |
| 139<br>8 | Westphal J, Deslandes A, Brogard J, et al. Reappraisal of amoxicillin absorption kinetics. Journal of antimicrobial chemotherapy. 1991;27(5):647-654.                                                                                        | Title          |
| 139<br>9 | Jaswal S, Nehra B, Kumar S, et al. Recent advancements in the medicinal chemistry of bacterial type II topoisomerase inhibitors. Bioorganic Chemistry. 2020 2020/11/01/;104:104266.                                                          | Title          |
| 140<br>0 | Malik P, Mukherjee TK. Recent advances in gold and silver nanoparticle based therapies for lung and breast cancers. International Journal of Pharmaceutics. 2018 2018/12/20/;553(1):483-509.                                                 | Title          |
| 140<br>1 | Kaialy W, Al Shafiee M. Recent advances in the engineering of nanosized active pharmaceutical ingredients: Promises and challenges. Advances in Colloid and Interface Science. 2016 2016/02/01/;228:71-91.                                   | Title          |
| 140<br>2 | Shamekhi Amiri F. Recent advances in the treatment of renal diseases with nebivolol: A literature review. Néphrologie & Thérapeutique. 2016 2016/06/01/;12(3):140-148.                                                                       | Title          |
| 140<br>3 | Jin HE, Jin SE, Maeng HJ. Recent bioanalytical methods for quantification of third-generation cephalosporins using HPLC and LC-MS (/MS) and their applications in pharmacokinetic studies. Biomedical Chromatography. 2014;28(11):1565-1587. | Abstract       |
| 140<br>4 | Do NHN, Truong QT, Le PK, et al. Recent developments in chitosan hydrogels carrying natural bioactive compounds. Carbohydrate Polymers. 2022 2022/10/15/;294:119726.                                                                         | Title          |

|          |                                                                                                                                                                                                                                                                                                   |                   |
|----------|---------------------------------------------------------------------------------------------------------------------------------------------------------------------------------------------------------------------------------------------------------------------------------------------------|-------------------|
| 140<br>5 | DÜRckheimer W, Adam F, Fischer G, et al. Recent Developments in the Field of Cephem Antibiotics. In: Testa B, editor. Advances in Drug Research. Vol. 17: Academic Press; 1988. p. 61-234.                                                                                                        | Title             |
| 140<br>6 | Mogabgab WJ. Recent developments in the treatment of sexually transmitted diseases. The American Journal of Medicine. 1991 1991/12/30;91(6, Supplement 1):S140-S144.                                                                                                                              | Title             |
| 140<br>7 | Recent research in infectious disease drug resistance. Drug Resistance Updates. 2008 2008/08/01;11(4):180-199.                                                                                                                                                                                    | Title             |
| 140<br>8 | Grant GB, Campbell H, Dowell SF, et al. Recommendations for treatment of childhood non-severe pneumonia. The Lancet Infectious Diseases. 2009 2009/03/01;9(3):185-196.                                                                                                                            | Title             |
| 140<br>9 | Jerath N, Shetty G. Redefining the management of pediatric tonsillopharyngitis with cefprozil. Indian J Pediatr. 2007 Dec;74(12):1105-8.                                                                                                                                                          | Title             |
| 141<br>0 | Wagner LM, Crews KR, Stewart CF, et al. Reducing irinotecan-associated diarrhea in children. Pediatric blood & cancer. 2008;50(2):201-207.                                                                                                                                                        | Title             |
| 141<br>1 | Tonelli AP, Bialer M, Yacobi A. Relationship between protein binding and renal clearance of a new oral cephalosporin in the dog. J Pharm Sci. 1985 Nov;74(11):1242-4.                                                                                                                             | Animal            |
| 141<br>2 | Kees F, Naber KG, Sigl G, et al. Relative bioavailability of three cefixime formulations [Journal: Article]. Arzneimittel-forschung/drug research. 1990;40(3):293-297.                                                                                                                            | Not<br>Accessible |
| 141<br>3 | Drusano G, Craig W. Relevance of pharmacokinetics and pharmacodynamics in the selection of antibiotics for respiratory tract infections. Journal of chemotherapy (Florence, Italy). 1997;9:38-44.                                                                                                 | Title             |
| 141<br>4 | Tanaka M, Tunoe H, Egashira T, et al. A remarkable reduction in the susceptibility of Neisseria gonorrhoeae isolates to cepheims and the selection of antibiotic regimens for the single-dose treatment of gonococcal infection in Japan. Journal of infection and chemotherapy. 2002;8(1):81-86. | Title             |

|          |                                                                                                                                                                                                                                                                   |          |
|----------|-------------------------------------------------------------------------------------------------------------------------------------------------------------------------------------------------------------------------------------------------------------------|----------|
| 141<br>5 | Anwar M, Bilal A, Muhammad M, et al. Renal clearance and urinary excretion of cefspan® in healthy male volunteers. Scholar's Adv Anim Vet Res. 2015;2:117-122.                                                                                                    | Title    |
| 141<br>6 | Hoffmann F, Boesch D, Dörks M, et al. Renal insufficiency and medication in nursing home residents: a cross-sectional study (IMREN). Deutsches Ärzteblatt International. 2016;113(6):92.                                                                          | Title    |
| 141<br>7 | Huo X, Liu K. Renal organic anion transporters in drug–drug interactions and diseases. European Journal of Pharmaceutical Sciences. 2018 2018/01/15/;112:8-19.                                                                                                    | Title    |
| 141<br>8 | Liu Y, Lu Y, Xu Z, et al. Repurposing of the gold drug auranofin and a review of its derivatives as antibacterial therapeutics. Drug Discovery Today. 2022 2022/07/01/;27(7):1961-1973.                                                                           | Title    |
| 141<br>9 | Gunther EC, Smith LM, Kostylev MA, et al. Rescue of Transgenic Alzheimer's Pathophysiology by Polymeric Cellular Prion Protein Antagonists. Cell Reports. 2019 2019/01/02/;26(1):145-158.e8.                                                                      | Title    |
| 142<br>0 | Sakane K, Kawabata K, Inamoto Y, et al. Research and development of new oral cepheims, cefixime and cefdinir. Yakugaku Zasshi: Journal of the Pharmaceutical Society of Japan. 1993;113(9):605-626.                                                               | Abstract |
| 142<br>1 | Škerk V, Majdak-Gluhinić V, Arsov D. Research on the efficacy, tolerability and cost effectiveness of cefixime in the» switch «therapy of urinary tract infections and urosepsis. Infektološki glasnik. 2006;26(2):81-84.                                         | Abstract |
| 142<br>2 | Khalim W, Mwesigye J, Tungotyo M, et al. Resistance pattern of infected chronic wound isolates and factors associated with bacterial resistance to third generation cephalosporins at Mbarara Regional Referral Hospital, Uganda. Plos one. 2021;16(12):e0261264. | Abstract |
| 142<br>3 | Verhoef J, Gillissen A. Resistant Haemophilus influenzae in community-acquired respiratory tract infections: a role for cefixime. International journal of antimicrobial agents. 2003;21(6):501-509.                                                              | Abstract |

|          |                                                                                                                                                                                                                                                                                                                                                   |          |
|----------|---------------------------------------------------------------------------------------------------------------------------------------------------------------------------------------------------------------------------------------------------------------------------------------------------------------------------------------------------|----------|
| 142<br>4 | Manwar J, Kumbhar DD, Bakal R, et al. Response surface based co-optimization of release kinetics and mucoadhesive strength for an oral mucoadhesive tablet of cefixime trihydrate. Bulletin of Faculty of Pharmacy, Cairo University. 2016;54(2):227-235.                                                                                         | Abstract |
| 142<br>5 | Feshchenko Y, Dzyublik A, Pertseva T, et al. Results from the Survey of Antibiotic Resistance (SOAR) 2011-13 in Ukraine. J Antimicrob Chemother. 2016 May;71 Suppl 1(Suppl 1):i63-9.                                                                                                                                                              | Title    |
| 142<br>6 | Torumkuney D, Smayevsky J, Relloso MS, et al. Results from the Survey of Antibiotic Resistance (SOAR) 2015-17 in Latin America (Argentina, Chile and Costa Rica): data based on CLSI, EUCAST (dose-specific) and pharmacokinetic/pharmacodynamic (PK/PD) breakpoints. J Antimicrob Chemother. 2020 Apr 1;75(Suppl 1):i43-i59.                     | Title    |
| 142<br>7 | Torumkuney D, Anwar S, Nizamuddin S, et al. Results from the Survey of Antibiotic Resistance (SOAR) 2015–17 in Pakistan: Data based on CLSI, EUCAST (dose-specific) and pharmacokinetic/pharmacodynamic (PK/PD) breakpoints. Journal of Antimicrobial Chemotherapy. 2020;75(Supplement_1):i76-i87.                                                | Title    |
| 142<br>8 | Torumkuney D, Mokaddas E, Jiman-Fatani A, et al. Results from the Survey of Antibiotic Resistance (SOAR) 2015–17 in the Middle East (Kuwait, Lebanon and Saudi Arabia): Data based on CLSI, EUCAST (dose-specific) and pharmacokinetic/pharmacodynamic (PK/PD) breakpoints. Journal of Antimicrobial Chemotherapy. 2020;75(Supplement_1):i60-i75. | Title    |
| 142<br>9 | Torumkuney D, Tunger A, Sancak B, et al. Results from the Survey of Antibiotic Resistance (SOAR) 2015–17 in Turkey: data based on CLSI, EUCAST (dose-specific) and pharmacokinetic/pharmacodynamic (PK/PD) breakpoints. Journal of Antimicrobial Chemotherapy. 2020;75(Supplement_1):i88-i99.                                                     | Title    |
| 143<br>0 | Torumkuney D, Hammami A, Mezghani Maalej S, et al. Results from the Survey of Antibiotic Resistance (SOAR) 2015–18 in Tunisia, Kenya and Morocco: Data based on CLSI, EUCAST (dose-specific) and                                                                                                                                                  | Title    |

|          |                                                                                                                                                                                                                                                                                                                                     |       |
|----------|-------------------------------------------------------------------------------------------------------------------------------------------------------------------------------------------------------------------------------------------------------------------------------------------------------------------------------------|-------|
|          | pharmacokinetic/pharmacodynamic (PK/PD) breakpoints. Journal of Antimicrobial Chemotherapy. 2020;75(Supplement_1):i2-i18.                                                                                                                                                                                                           |       |
| 143<br>1 | Torumkuney D, Van PH, Thinh LQ, et al. Results from the Survey of Antibiotic Resistance (SOAR) 2016-18 in Vietnam, Cambodia, Singapore and the Philippines: data based on CLSI, EUCAST (dose-specific) and pharmacokinetic/pharmacodynamic (PK/PD) breakpoints. J Antimicrob Chemother. 2020 Apr 1;75(Suppl 1):i19-i42.             | Title |
| 143<br>2 | Torumkuney D, Bratus E, Yuvko O, et al. Results from the Survey of Antibiotic Resistance (SOAR) 2016-17 in Ukraine: data based on CLSI, EUCAST (dose-specific) and pharmacokinetic/pharmacodynamic (PK/PD) breakpoints. Journal of Antimicrobial Chemotherapy. 2020;75(Supplement_1):i100-i111.                                     | Title |
| 143<br>3 | Torumkuney D, Van P, Thinh L, et al. Results from the Survey of Antibiotic Resistance (SOAR) 2016-18 in Vietnam, Cambodia, Singapore and the Philippines: Data based on CLSI, EUCAST (dose-specific) and pharmacokinetic/pharmacodynamic (PK/PD) breakpoints. Journal of Antimicrobial Chemotherapy. 2020;75(Supplement_1):i19-i42. | Title |
| 143<br>4 | Gratrix J, Bergman J, Egan C, et al. Retrospective review of pharyngeal gonorrhoea treatment failures in Alberta, Canada. Sexually transmitted diseases. 2013;40(11):877-879.                                                                                                                                                       | Title |
| 143<br>5 | Guay DRP. Review of cefditoren, an advanced-generation, broad-spectrum oral cephalosporin. Clinical Therapeutics. 2001 2001/12/01;23(12):1924-1937.                                                                                                                                                                                 | Title |
| 143<br>6 | Rzeszutek M, Wierzbowski A, Hoban DJ, et al. A review of clinical failures associated with macrolide-resistant Streptococcus pneumoniae. International Journal of Antimicrobial Agents. 2004 2004/08/01;24(2):95-104.                                                                                                               | Title |
| 143<br>7 | Barriere SL. Review of in vitro activity, pharmacokinetic characteristics, safety, and clinical efficacy of cefprozil, a new oral cephalosporin. Annals of Pharmacotherapy. 1993;27(9):1082-1089.                                                                                                                                   | Title |

|          |                                                                                                                                                                                                                                                  |       |
|----------|--------------------------------------------------------------------------------------------------------------------------------------------------------------------------------------------------------------------------------------------------|-------|
| 143<br>8 | Borin MT. A review of the pharmacokinetics of cefpodoxime proxetil. <i>Drugs</i> . 1991;42(3):13-21.                                                                                                                                             | Title |
| 143<br>9 | Kalman D, Barriere SL. Review of the pharmacology, pharmacokinetics, and clinical use of cephalosporins. <i>Texas Heart Institute Journal</i> . 1990;17(3):203.                                                                                  | Title |
| 144<br>0 | Silva O, Caldeira G, Serrano R. A review of the role of medicinal plants on <i>Neisseria gonorrhoeae</i> infection. <i>European Journal of Integrative Medicine</i> . 2020 2020/10/01/;39:101211.                                                | Title |
| 144<br>1 | Sader HS, Jacobs MR, Fritsche TR. Review of the spectrum and potency of orally administered cephalosporins and amoxicillin/clavulanate. <i>Diagnostic Microbiology and Infectious Disease</i> . 2007 2007/03/01/;57(3, Supplement):S5-S12.       | Title |
| 144<br>2 | Gerometta E, Grondin I, Smadja J, et al. A review of traditional uses, phytochemistry and pharmacology of the genus <i>Indigofera</i> . <i>Journal of Ethnopharmacology</i> . 2020 2020/05/10/;253:112608.                                       | Title |
| 144<br>3 | Kalyani K, Radha K, Kumar SS, et al. Review on Bioanalytical Methods for Determination of Cephalosporins by Using HPLC and LC-MS.                                                                                                                | Title |
| 144<br>4 | Al Kamaly O. Review on Characterization, Properties, and Analytical Methods of Cefepime. <i>International Journal of Analytical Chemistry</i> . 2022;2022:6909528-6909528.                                                                       | Title |
| 144<br>5 | Maideen NM, Raj Kapoor B, Muthusamy S, et al. A Review on Pharmacokinetic and Pharmacodynamic Drug Interactions of Adrenergic $\beta$ -blockers with Clinically Relevant Drugs-An Overview. <i>Current Drug Metabolism</i> . 2021;22(9):672-682. | Title |
| 144<br>6 | Li S, Cheng X, Wang C. A review on traditional uses, phytochemistry, pharmacology, pharmacokinetics and toxicology of the genus <i>Peganum</i> . <i>Journal of Ethnopharmacology</i> . 2017 2017/05/05/;203:127-162.                             | Title |
| 144<br>7 | Winstead W. Rhinosinusitis. <i>Primary Care: Clinics in Office Practice</i> . 2003 2003/03/01/;30(1):137-154.                                                                                                                                    | Title |

|          |                                                                                                                                                                                                                                               |          |
|----------|-----------------------------------------------------------------------------------------------------------------------------------------------------------------------------------------------------------------------------------------------|----------|
| 144<br>8 | Redington J, Ebert SC, Craig WA. Role of antimicrobial pharmacokinetics and pharmacodynamics in surgical prophylaxis. Reviews of infectious diseases. 1991;13(Supplement_10):S790-S799.                                                       | Title    |
| 144<br>9 | Westphal JF, Jehl F, Adloff M, et al. Role of intrahepatic protein binding in the hepatobiliary extraction profile of cefixime in humans. Clinical Pharmacology & Therapeutics. 1993;54(5):476-484.                                           | Abstract |
| 145<br>0 | Rial R, Liu Z, Messina P, et al. Role of nanostructured materials in hard tissue engineering. Advances in Colloid and Interface Science. 2022 2022/06/01/;304:102682.                                                                         | Title    |
| 145<br>1 | Anzueto A, Bishai WR, Pottumarthy S. Role of oral extended-spectrum cepheims in the treatment of acute exacerbation of chronic bronchitis. Diagnostic Microbiology and Infectious Disease. 2007 2007/03/01/;57(3, Supplement):S31-S38.        | Title    |
| 145<br>2 | Sugiura T, Kato Y, Tsuji A. Role of SLC xenobiotic transporters and their regulatory mechanisms PDZ proteins in drug delivery and disposition. Journal of Controlled Release. 2006 2006/11/28/;116(2):238-246.                                | Title    |
| 145<br>3 | Ellington MJ, Ekelund O, Aarestrup FM, et al. The role of whole genome sequencing in antimicrobial susceptibility testing of bacteria: report from the EUCAST Subcommittee. Clinical Microbiology and Infection. 2017 2017/01/01/;23(1):2-22. | Title    |
| 145<br>4 | Al-Kuraishy HM, Al-Gareeb AI, Al-Buhadily AK. Rosuvastatin as forthcoming antibiotic or as adjuvant additive agent: In vitro novel antibacterial study. Journal of laboratory physicians. 2018;10(03):271-275.                                | Title    |
| 145<br>5 | Vignesh S. RP-HPLC Method Development and Validation for related Substance of Cefixime Oral Suspension: JKK Nattraja College of Pharmacy, Komarapalayam; 2018.                                                                                | Abstract |
| 145<br>6 | Klesel N, Adam F, Isert D, et al. RU 29 246, THE ACTIVE COMPOUND OF THE CEPHALOSPORIN PRODRUG-ESTER HR 916 III. PHARMACOKINETIC PROPERTIES AND ANTIBACTERIAL ACTIVITY IN VIVO. The Journal of Antibiotics. 1992;45(6):922-931.                | Abstract |



|          |                                                                                                                                                                                                                  |          |
|----------|------------------------------------------------------------------------------------------------------------------------------------------------------------------------------------------------------------------|----------|
| 145<br>7 | Bauernfeind A, Jungwirth R, Eberlein E, et al. RU 29 246, the active compound of the cephalosporin-prodrug-ester HR 916. I. Antibacterial activity in vitro. J Antibiot (Tokyo). 1992 Apr;45(4):505-20.          | Abstract |
| 145<br>8 | Weiner CP, Buhimschi C. S. In: Weiner CP, Buhimschi C, editors. Drugs for Pregnant and Lactating Women (Second Edition). Philadelphia: W.B. Saunders; 2009. p. 1016-1064.                                        | Title    |
| 145<br>9 | Weiner CP, Mason C. S. In: Weiner CP, Mason C, editors. Drugs for Pregnant and Lactating Women (Third Edition). Philadelphia: Elsevier; 2019. p. 793-836.                                                        | Title    |
| 146<br>0 | Kong F. S02. 1 Antimicrobial resistance and extragenital STIs–pharmacokinetic considerations. BMJ Publishing Group Ltd; 2021.                                                                                    | Title    |
| 146<br>1 | S8 – S47 and O50 – O440. Clinical Microbiology and Infection. 2006 2006/01/01/;12:S1-S110.                                                                                                                       | Title    |
| 146<br>2 | Lode H. Safety and Tolerability of Commonly Prescribed Oral Antibiotics for the Treatment of Respiratory Tract Infections. The American Journal of Medicine. 2010 2010/04/01/;123(4, Supplement):S26-S38.        | Title    |
| 146<br>3 | Ball P, Stahlmann R, Kubin R, et al. Safety profile of oral and intravenous moxifloxacin: Cumulative data from clinical trials and postmarketing studies. Clinical Therapeutics. 2004 2004/07/01/;26(7):940-950. | Title    |
| 146<br>4 | Bertino J, Fish D. The safety profile of the fluoroquinolones. Clinical Therapeutics. 2000 2000/07/01/;22(7):798-817.                                                                                            | Title    |
| 146<br>5 | Venetis G, Chatzika K, Pitsiou G, et al. Saliva and Blood Concentration of Cefuroxime in Patients Undergoing Maxillofacial Surgery. Journal of Oral and Maxillofacial Surgery. 2012 2012/06/01/;70(6):1398-1403. | Title    |
| 146<br>6 | Tonelli AP, Bialer M, Look ZM, et al. Saturable processes affecting renal clearance of cefixime in dogs. Pharmaceutical research. 1986;3(3):150-155.                                                             | Animal   |

|          |                                                                                                                                                                                                                                                          |          |
|----------|----------------------------------------------------------------------------------------------------------------------------------------------------------------------------------------------------------------------------------------------------------|----------|
| 146<br>7 | Tsuji A, Hirooka H, Terasaki T, et al. Saturable uptake of cefixime, a new oral cephalosporin without an $\alpha$ -amino group, by the rat intestine. <i>Journal of pharmacy and pharmacology</i> . 1987;39(4):272-277.                                  | Animal   |
| 146<br>8 | Sangwan S, Yadav N, Kumar R, et al. A score years' update in the synthesis and biological evaluation of medicinally important 2-pyridones. <i>European Journal of Medicinal Chemistry</i> . 2022<br>2022/03/15/;232:114199.                              | Title    |
| 146<br>9 | Mohamed HM. Screen-printed disposable electrodes: Pharmaceutical applications and recent developments. <i>TrAC Trends in Analytical Chemistry</i> . 2016 2016/09/01/;82:1-11.                                                                            | Title    |
| 147<br>0 | Baig JA, Muhammad M, Akhtar K, et al. Selective electrochemical sensing of cefixime by silver nanoparticle amalgam paste microelectrode. <i>Journal of Materials Science: Materials in Electronics</i> . 2022:1-13.                                      | Abstract |
| 147<br>1 | Chen Z-j, Zhang J, Yu J-c, et al. Selective method for the determination of cefdinir in human plasma using liquid chromatography electrospray ionization tandem mass spectrometry. <i>Journal of Chromatography B</i> . 2006 2006/04/13/;834(1):163-169. | Title    |
| 147<br>2 | Pulcini C, Tebano G, Mutters NT, et al. Selective reporting of antibiotic susceptibility test results in European countries: an ESCMID cross-sectional survey. <i>International Journal of Antimicrobial Agents</i> . 2017<br>2017/02/01/;49(2):162-166. | Title    |
| 147<br>3 | Nielsen EI, Viberg A, Löwdin E, et al. Semimechanistic pharmacokinetic/pharmacodynamic model for assessment of activity of antibacterial agents from time-kill curve experiments. <i>Antimicrobial agents and chemotherapy</i> . 2007;51(1):128-136.     | Title    |
| 147<br>4 | Oteo J, Alós J-I, Gómez-Garcés J-L. Sensibilidad in vitro actual de los patógenos respiratorios bacterianos más frecuentes: implicaciones clínicas. <i>Medicina Clínica</i> . 2001 2001/01/01/;116(14):541-549.                                          | Title    |
| 147<br>5 | Thiruvengadam E, Ramadoss R, Amudha M. Sensitive spectroscopic method for content analysis of cefixime in solid dosage form using hydrotrophy phenomenon. <i>Chronicles of Young Scientists</i> . 2012;3(4):299-299.                                     | Abstract |

|          |                                                                                                                                                                                                                                           |          |
|----------|-------------------------------------------------------------------------------------------------------------------------------------------------------------------------------------------------------------------------------------------|----------|
| 147<br>6 | Janknegt R, Van der Meer J. Sequential therapy with intravenous and oral cephalosporins. Journal of Antimicrobial Chemotherapy. 1994;33(1):169-177.                                                                                       | Abstract |
| 147<br>7 | Casellas J, Tome G, Exeni R, et al. Serum and urinary cefpodoxime levels and time killing curves performed in the urine of children presenting urinary tract infections. Pathologie-biologie. 1993;41(4):385-391.                         | Title    |
| 147<br>8 | Dan M, Poch F, Edelman A, et al. Serum bactericidal activity of newer oral cephalosporins in healthy volunteers. The Journal of antimicrobial chemotherapy. 1998;41(4):485-488.                                                           | Abstract |
| 147<br>9 | Barbee LA, Dombrowski JC, Hermann S, et al. "Sex in the time of covid": clinical guidelines for sexually transmitted disease management in an era of social distancing. Sexually transmitted diseases. 2020;47(7):427.                    | Title    |
| 148<br>0 | Donovan B. Sexually transmissible infections other than HIV. The Lancet. 2004 2004/02/14/;363(9408):545-556.                                                                                                                              | Title    |
| 148<br>1 | Pfennig CL. Sexually Transmitted Diseases in the Emergency Department. Emergency Medicine Clinics of North America. 2019 2019/05/01/;37(2):165-192.                                                                                       | Title    |
| 148<br>2 | Steen R, Dallabetta G. Sexually Transmitted Infection Control with Sex Workers: Regular Screening and Presumptive Treatment Augment Efforts to Reduce Risk and Vulnerability. Reproductive Health Matters. 2003 2003/11/01/;11(22):74-90. | Title    |
| 148<br>3 | Niforatos JD, Rothman RE. Sexually Transmitted Infections Treatment Guidelines, 2021. Annals of Emergency Medicine. 2022;80(1):68-70.                                                                                                     | Title    |
| 148<br>4 | Unemo M, Bradshaw CS, Hocking JS, et al. Sexually transmitted infections: challenges ahead. The Lancet Infectious Diseases. 2017 2017/08/01/;17(8):e235-e279.                                                                             | Title    |

|          |                                                                                                                                                                                                                                                     |          |
|----------|-----------------------------------------------------------------------------------------------------------------------------------------------------------------------------------------------------------------------------------------------------|----------|
| 148<br>5 | Chachaty E, Bourneix C, Renard S, et al. Shedding of Clostridium difficile, fecal beta-lactamase activity, and gastrointestinal symptoms in 51 volunteers treated with oral cefixime. Antimicrobial agents and chemotherapy. 1993;37(7):1432-1435.  | Abstract |
| 148<br>6 | Sanchez M, Collvinent B, Miro O, et al. Short-term effectiveness of ceftriaxone single dose in the initial treatment of acute uncomplicated pyelonephritis in women. A randomised controlled trial. Emergency medicine journal. 2002;19(1):19-22.   | Title    |
| 148<br>7 | Day MJ, Jacobsson S, Spiteri G, et al. Significant increase in azithromycin “resistance” and susceptibility to ceftriaxone and cefixime in Neisseria gonorrhoeae isolates in 26 European countries, 2019. BMC Infectious Diseases. 2022;22(1):1-10. | Abstract |
| 148<br>8 | Hue TTT, Son DC, Anh NTL, et al. A Simple and Rapid Method to Measure Residue of Cefexime—a Cephalosporin Antibiotic in the Wastewater of Pharmaceutical Production Plant. 2014.                                                                    | Abstract |
| 148<br>9 | Mahrouse MA, Elwy HM, Salem EM. Simultaneous determination of cefixime and erdosteine in combined dosage form using validated spectrophotometric methods. Spectrochimica Acta Part A: Molecular and Biomolecular Spectroscopy. 2020;241:118647.     | Abstract |
| 149<br>0 | Madgulkar AR, Sonawane PA, Dhoka MV, et al. Simultaneous Determination of Cefixime Trihydrate and Erdosteine in Human Plasma by HPTLC Method. Research Journal of Pharmacy and Technology. 2011;4(7):1078-1082.                                     | Abstract |
| 149<br>1 | Attimarad M, Al-Dhubiab BE, Alhaider IA, et al. Simultaneous determination of moxifloxacin and cefixime by first and ratio first derivative ultraviolet spectrophotometry. Chemistry Central Journal. 2012;6(1):1-7.                                | Abstract |
| 149<br>2 | Attimarad M, Nair A. Simultaneous determination of ofloxacin and cefixime by first and ratio first derivative UV spectrophotometry. Chronicles of young scientists. 2011;2(3):144-144.                                                              | Abstract |

|          |                                                                                                                                                                                                                                                                                                                           |          |
|----------|---------------------------------------------------------------------------------------------------------------------------------------------------------------------------------------------------------------------------------------------------------------------------------------------------------------------------|----------|
| 149<br>3 | Patwari A, Dabhi M, Rathod I, et al. Simultaneous determination of Ofloxacin and Cefixime in combined tablet dosage form by HPLC and absorbance correction method. Bulletin of Pharmaceutical Research. 2014;4(3):112-7.                                                                                                  | Abstract |
| 149<br>4 | Alnajjar AO. Simultaneous determination of ofloxacin and cefixime in tablet formulation using capillary electrophoresis. Journal of Liquid Chromatography & Related Technologies. 2013;36(19):2687-2697.                                                                                                                  | Abstract |
| 149<br>5 | Gundala U, Bonagiri C, Nayakanti D. SIMULTANEOUS ESTIMATION OF AZITHROMYCIN AND CEFIXIME IN BULK AND PHARMACEUTICAL FORMULATION BY REVERSE PHASE HIGH PERFORMANCE LIQUID CHROMATOGRAPHY (RP-HPLC). 2014.                                                                                                                  | Abstract |
| 149<br>6 | Raval PL, Mehta FA, Ahir KB, et al. Simultaneous estimation of azithromycin dihydrate and cefixime trihydrate in pharmaceutical formulation by HPTLC method. Journal of Liquid Chromatography & Related Technologies. 2014;37(13):1805-1818.                                                                              | Title    |
| 149<br>7 | Nyola N, Jeyabalan S. Simultaneous estimation of Cefixime and Azithromycin in API's and pharmaceutical dosage form by RP-HPLC. Indo American Journal of Pharmaceutical Research. 2013;2(12):1472-81.                                                                                                                      | Abstract |
| 149<br>8 | Bhinge SD, Malipatil SM, Sonawane LV. Simultaneous estimation of cefixime and cloxacillin in human plasma by reversed phase-HPLC with UV detection. Thai Journal of Pharmaceutical Sciences. 2012;36(2).                                                                                                                  | Abstract |
| 149<br>9 | Bhinge SD, Malipatil SM, Sonawane LV, et al. Simultaneous Estimation of Cefixime and Dicloxacillin in Bulk and Tablet Formulation by RP-HPLC Method/Sefiksim ve Dikloksasilin'in Ham Madde ve Farmasötik Formülasyonlardan TF-HPLC Yöntemi ile Eşzamanlı Tayini. FABAD Journal of Pharmaceutical Sciences. 2012;37(2):63. | Abstract |
| 150<br>0 | Natesan S, Loganathan R, Krishnaswami V, et al. Simultaneous estimation of Cefixime and ofloxacin in tablet dosage form by RP-HPLC. 2011.                                                                                                                                                                                 | Abstract |

|          |                                                                                                                                                                                                                                                                                                        |          |
|----------|--------------------------------------------------------------------------------------------------------------------------------------------------------------------------------------------------------------------------------------------------------------------------------------------------------|----------|
| 150<br>1 | Hussein LA, Hussien EM, Magdy N, et al. Simultaneous estimation of Ofloxacin and Cefixime in tablet form in presence of the inactive Ofloxacin USP Related compound A. Bulletin of Faculty of Pharmacy, Cairo University. 2017;55(1):171-176.                                                          | Abstract |
| 150<br>2 | Fekri M, Shahverdi V, Chegeni M, et al. Simultaneous photocatalytic degradation of cefixime and cefuroxime antibiotics using g-C3N4/NaBiO3 nanocomposite and optimization of effective parameters by response surface methodology. Reaction Kinetics, Mechanisms and Catalysis. 2022;135(2):1059-1075. | Abstract |
| 150<br>3 | Xue K, Li G, Sun X, et al. Simultaneous quantification of fosinopril and its active metabolite fosinoprilat in rat plasma by UFLC-MS/MS: Application of formic acid in the stabilization of an ester-containing drug. Journal of Chromatography B. 2015 2015/05/15/;990:141-149.                       | Title    |
| 150<br>4 | Helmy SA. Simultaneous quantification of linezolid, tinidazole, norfloxacin, moxifloxacin, levofloxacin, and gatifloxacin in human plasma for therapeutic drug monitoring and pharmacokinetic studies in human volunteers. Therapeutic drug monitoring. 2013;35(6):770-777.                            | Title    |
| 150<br>5 | Nanda R, Gaikwad J, Prakash A. Simultaneous Spectrophotometric Methods for estimation of Cefixime and Erdosteine in synthetic mixture. Research Journal of Pharmacy and Technology. 2009;2(3):582-584.                                                                                                 | Abstract |
| 150<br>6 | Plourde PJ, Tyndall M, Agoki E, et al. Single-dose cefixime versus single-dose ceftriaxone in the treatment of antimicrobial-resistant Neisseria gonorrhoeae infection. Journal of Infectious Diseases. 1992;166(4):919-922.                                                                           | Abstract |
| 150<br>7 | Megran D, Lefebvre K, Willetts V, et al. Single-dose oral cefixime versus amoxicillin plus probenecid for the treatment of uncomplicated gonorrhoea in men. Antimicrobial agents and chemotherapy. 1990;34(2):355-357.                                                                                 | Abstract |
| 150<br>8 | Kumamoto Y. Single-dose treatment of female acute uncomplicated cystitis. Infection. 1992;20 Suppl 3:S173-4.                                                                                                                                                                                           | Title    |

|      |                                                                                                                                                                                                                                                                                                            |                   |
|------|------------------------------------------------------------------------------------------------------------------------------------------------------------------------------------------------------------------------------------------------------------------------------------------------------------|-------------------|
| 1509 | Lameire N, Malerczyk V, Drees B, et al. Single-dose pharmacokinetics of cefpirome in patients with renal impairment. <i>Clinical Pharmacology &amp; Therapeutics</i> . 1992;52(1):24-30.                                                                                                                   | Title             |
| 1510 | Kaliner MA, Osguthorpe JD, Fireman P, et al. Sinusitis: Bench to bedside: Current findings, future directions. <i>Journal of Allergy and Clinical Immunology</i> . 1997 1997/06/01/;99(6, Part 3):S829-S847.                                                                                               | Title             |
| 1511 | Agrawal GP, Maheshwari RK, Mishra P. Solubility enhancement of cefixime trihydrate by solid dispersions using hydrotropic solubilization technique and their characterization. <i>Brazilian Journal of Pharmaceutical Sciences</i> . 2022;58.                                                              | Extensive reading |
| 1512 | Mogal P, Derle D. Soluplus as a potential enhancer of cefixime biopharmaceutical properties through solid dispersion prepared by different pharmaceutical interventions. <i>Integr J Glob Health</i> . 2017;1(2):11.                                                                                       | Abstract          |
| 1513 | Mouton JW. Soup with or without meatballs: impact of nutritional factors on the MIC, kill-rates and growth-rates. <i>European Journal of Pharmaceutical Sciences</i> . 2018;125:23-27.                                                                                                                     | Title             |
| 1514 | Holton E, Archer E, Fidal J, et al. Spatiotemporal urban water profiling for the assessment of environmental and public exposure to antimicrobials (antibiotics, antifungals, and antivirals) in the Eerste River Catchment, South Africa. <i>Environment International</i> . 2022 2022/06/01/;164:107227. | Title             |
| 1515 | Bukhari N, Al-Warthan AA, Wabaidur SM, et al. Spectrofluorimetric determination of cefixime in pharmaceutical preparation and biological fluids using calcein as a fluorescence probe. <i>Sensor Letters</i> . 2010;8(2):280-284.                                                                          | Abstract          |
| 1516 | Manzoori JL, Amjadi M, Soltani N, et al. Spectrofluorimetric determination of cefixime using terbium-danofloxacin probe. <i>Iranian Journal of Basic Medical Sciences</i> . 2014;17(4):256.                                                                                                                | Abstract          |
| 1517 | Shah J, Jan MR, Shah S. Spectrofluorimetric method for determination and validation of cefixime in pharmaceutical preparations through derivatization with 2-cyanoacetamide. <i>Journal of fluorescence</i> . 2011;21(2):579-585.                                                                          | Abstract          |

|          |                                                                                                                                                                                                                    |          |
|----------|--------------------------------------------------------------------------------------------------------------------------------------------------------------------------------------------------------------------|----------|
| 151<br>8 | Dhahir S, Mohammed N. SPECTROPHOTOMETRIC AND ATOMIC ABSORPTION DETERMINATION OF CEFIXIME BY CLOUD POINT EXTRACTION IN PURE FORM. The Iraqi Journal of Agricultural Science. 2019;50(4):1390-1404.                  | Abstract |
| 151<br>9 | Keskar MR, Jugade RM. Spectrophotometric determination of cefixime trihydrate in pharmaceutical formulations based on ion-pair reaction with bromophenol blue. Analytical chemistry insights. 2015;10:ACI. S28463. | Abstract |
| 152<br>0 | Önal C, Dinçel D. Spectrophotometric determination of erdosteine at capsule dosage forms. Bezmialem Science. 2021.                                                                                                 | Title    |
| 152<br>1 | Suganthi M, Elango KP. Spectroscopic studies on in vitro binding of cefixime and tolcapone drugs with serum albumin. Physics and Chemistry of Liquids. 2018;56(3):299-310.                                         | Abstract |
| 152<br>2 | Parks KS, Dixon PB, Richey CM, et al. Spontaneous clearance of Chlamydia trachomatis infection in untreated patients. Sex Transm Dis. 1997 Apr;24(4):229-35.                                                       | Title    |
| 152<br>3 | Alaei S, Ghasemian E, Vatanara A. Spray drying of cefixime nanosuspension to form stabilized and fast dissolving powder. Powder Technology. 2016;288:241-248.                                                      | Abstract |
| 152<br>4 | Haghighi DM, Faghihi H, Darabi M, et al. Spray freeze drying to solidify Nanosuspension of Cefixime into inhalable microparticles. DARU Journal of Pharmaceutical Sciences. 2022;30(1):17-27.                      | Abstract |
| 152<br>5 | Kline JA, Runge JW. Streptococcal pharyngitis: A review of pathophysiology, diagnosis, and management. The Journal of Emergency Medicine. 1994 1994/09/01;12(5):665-680.                                           | Title    |
| 152<br>6 | Paradisi J, Corti G, Cinelli R. Streptococcus pneumoniae as an agent of nosocomial infection: treatment in the era of penicillin-resistant strains. Clinical Microbiology and Infection. 2001 2001/01/01;7:34-42.  | Title    |
| 152<br>7 | Jacobs MR. Streptococcus pneumoniae: Epidemiology and patterns of resistance. The American Journal of Medicine Supplements. 2004 2004/08/02;117(3, Supplement 1):3-15.                                             | Title    |



|          |                                                                                                                                                                                                                                                                                                        |                |
|----------|--------------------------------------------------------------------------------------------------------------------------------------------------------------------------------------------------------------------------------------------------------------------------------------------------------|----------------|
| 152<br>8 | Kaplan SL. Streptococcus pneumoniae: Impact of antibiotic resistance in pediatrics. Current Problems in Pediatrics. 1997 1997/05/01/;27(5):187-195.                                                                                                                                                    | Title          |
| 152<br>9 | Preston SL, Drusano GL. STRUCTURE ACTIVITY RELATIONSHIPS. Community-Acquired Respiratory Infections: Antimicrobial Management. 2003;31:110.                                                                                                                                                            | Title          |
| 153<br>0 | Bingen E, Lambert-Zechovsky N. [Structure-activity relationship of oral cephalosporins]. Presse Med. 1989 Nov 25;18(39):1923-7.                                                                                                                                                                        | Not Accessible |
| 153<br>1 | Singh B, Bhat HR, Kumawat MK, et al. Structure-guided discovery of 1,3,5-triazine-pyrazole conjugates as antibacterial and antibiofilm agent against pathogens causing human diseases with favorable metabolic fate. Bioorganic & Medicinal Chemistry Letters. 2014 2014/08/01/;24(15):3321-3325.      | Title          |
| 153<br>2 | Yamanaka H, Chiba T, Kawabata K, et al. Studies on beta-lactam antibiotics. IX. Synthesis and biological activity of a new orally active cephalosporin, cefixime (FK027). J Antibiot (Tokyo). 1985 Dec;38(12):1738-51.                                                                                 | Abstract       |
| 153<br>3 | Yokoo C, Goi M, Onodera A, et al. Studies on cephalosporin antibiotics. IV. Synthesis, antibacterial activity and oral absorption of new 3-(2-substituted-vinylthio)-7 beta-[(Z)-2-(2-aminothiazol-4-yl)-2-(carboxymethoxyimino)acetamido]cephalosporins. J Antibiot (Tokyo). 1991 Dec;44(12):1422-31. | Abstract       |
| 153<br>4 | Inamoto Y, Chiba T, Sakane K, et al. [Studies on FK482. II. Synthesis and structure-activity relationships of 7 beta-[(Z)-2-(2-aminothiazol-4-yl)-2-substituted acetamido]-3-vinyl-3-cephem-4-carboxylic acid derivatives]. Yakugaku Zasshi. 1990 Apr;110(4):246-57.                                   | Not Accessible |
| 153<br>5 | Divya R, Sivaneswari S, Preethi N, et al. Studies on Oral Sustain Delivery of Cefixime from Floating Matrix Tablets Formulation and In Vitro Evaluation. Research Journal of Pharmacy and Technology. 2014;7(7):798.                                                                                   | Abstract       |

|          |                                                                                                                                                                                                                                                                                                                    |                   |
|----------|--------------------------------------------------------------------------------------------------------------------------------------------------------------------------------------------------------------------------------------------------------------------------------------------------------------------|-------------------|
| 153<br>6 | Kalia P, Kumar NR, Harjai K. Studies on the therapeutic effect of propolis along with standard antibacterial drug in Salmonella enterica serovar Typhimurium infected BALB/c mice. BMC complementary and alternative medicine. 2016;16(1):1-15.                                                                    | Animal            |
| 153<br>7 | Yamanaka H, CHIBA T, KAWABATA K, et al. Studies on $\beta$ -lactam antibiotics IX. Synthesis and biological activity of a new orally active cephalosporin, cefixime (FK027). The Journal of antibiotics. 1985;38(12):1738-1751.                                                                                    | Abstract          |
| 153<br>8 | Petitjean O, Brion N, Tod M, et al. Study of a possible pharmacokinetic interaction between cefixime and two antacids. Preliminary results. ETUDE DE L'INTERACTION PHARMACOCINETIQUE ENTRE LE CEFIXIME ET DEUX ANTIACIDES. RESULTATS PRELIMINAIRES. Presse medicale (Paris, France : 1983). 1989;18(32):1596-1598. | Not<br>Accessible |
| 153<br>9 | Mishra B, Singh AK, Yadav SK. Study of comparative aspects of gastroretentive delivery of cefixime trihydrate from microspheres and microsphere based tablets. Journal of Pharmaceutical Investigation. 2015;45(6):541-554.                                                                                        | Abstract          |
| 154<br>0 | Tanimura H, Uchiyama K, Onishi H, et al. Study of the absorption of cefcapene pivoxil in patients with infectious disease and soft stool or diarrhea. Journal of Infection and Chemotherapy. 2003 2003/01/01;9(1):75-82.                                                                                           | Title             |
| 154<br>1 | Combinations FD. A Study On Analysis Of Fixed Drug Combinations Widely Prescribed in India.                                                                                                                                                                                                                        | Title             |
| 154<br>2 | Baby B, DAS S, HAQUE I, et al. A Study on Prescribing Pattern of Antibiotics for Respiratory Tract Infection in Pediatric Outpatient in A Tertiary Care Hospital: A Prospective Observational Study. International Journal of Pharmaceutical Sciences Review and Research. 2019;59(1):30-33.                       | Title             |

|          |                                                                                                                                                                               |          |
|----------|-------------------------------------------------------------------------------------------------------------------------------------------------------------------------------|----------|
| 154<br>3 | Huo B, Zhao L, Qiu F. Study on the content determination of Cefixime and its pharmacokinetics in human plasma. WEST CHINA JOURNAL OF PHARMACEUTICAL SCIENCES. 2005;20(4):312. | Abstract |
| 154<br>4 | Kaushik P, Mittal A, Kumar S, et al. Study the Effect of Liquid Solid Compact Technology on Drug's Pharmacokinetic and Pharmacodynamic Behaviour.                             | Title    |
| 154<br>5 | Nct. Study to Improve Partner Services for STD Prevention. <a href="https://clinicaltrials.gov/show/NCT00207467">https://clinicaltrials.gov/show/NCT00207467</a> . 2005.      | Title    |
| 154<br>6 | Subject index. Journal of Chromatography B: Biomedical Sciences and Applications. 1987 1987/01/01;422:365-369.                                                                | Title    |
| 154<br>7 | Subject index. Current Therapeutic Research. 1993 1993/12/01;54(6):856-859.                                                                                                   | Title    |
| 154<br>8 | Subject index. Seminars in Pediatric Infectious Diseases. 1999 1999/10/01;10(4):269-275.                                                                                      | Title    |
| 154<br>9 | Subject Index. Clinical Microbiology and Infection. 2003 2003/01/01;9:440-451.                                                                                                | Title    |
| 155<br>0 | Subject Index. In: Caballero B, editor. Encyclopedia of Food Sciences and Nutrition (Second Edition). Oxford: Academic Press; 2003. p. 6347-6601.                             | Title    |
| 155<br>1 | Subject Index. Clinical Microbiology and Infection. 2004 2004/01/01;10:704-715.                                                                                               | Title    |
| 155<br>2 | Subject Index. In: Westerink BHC, Cremers TIFH, editors. Handbook of Behavioral Neuroscience. Vol. 16: Elsevier; 2006. p. 687-697.                                            | Title    |
| 155<br>3 | Subject Index. In: Schaefer C, Peters P, Miller RK, editors. Drugs During Pregnancy and Lactation (Second Edition). Oxford: Academic Press; 2007. p. 853-875.                 | Title    |

|          |                                                                                                                                                                                                                                                                                                                       |        |
|----------|-----------------------------------------------------------------------------------------------------------------------------------------------------------------------------------------------------------------------------------------------------------------------------------------------------------------------|--------|
| 155<br>4 | Subject index to volume 13. Diagnostic Microbiology and Infectious Disease. 1990 1990/11/01/;13(6):529-541.                                                                                                                                                                                                           | Title  |
| 155<br>5 | Subject Index to volume 14. Diagnostic Microbiology and Infectious Disease. 1991 1991/11/01/;14(6):529-536.                                                                                                                                                                                                           | Title  |
| 155<br>6 | Subject index to volume 15. Diagnostic Microbiology and Infectious Disease. 1992 1992/11/01/;15(8):710-722.                                                                                                                                                                                                           | Title  |
| 155<br>7 | Subject Index Volume 74 July–December, 2006. Contraception. 2006 2006/12/01/;74(6):503-510.                                                                                                                                                                                                                           | Title  |
| 155<br>8 | Subject index volumes 351–400. Journal of Chromatography A. 1987 1987/01/01/;401:137-379.                                                                                                                                                                                                                             | Title  |
| 155<br>9 | Subject index volumes 401–450. Journal of Chromatography A. 1988 1988/01/01/;451:155-424.                                                                                                                                                                                                                             | Title  |
| 156<br>0 | Niwa T, Imagawa Y. Substrate specificity of human cytochrome P450 (CYP) 2C subfamily and effect ofazole antifungal agents on CYP2C8. Journal of Pharmacy & Pharmaceutical Sciences. 2016;19(4):423-429.                                                                                                               | Title  |
| 156<br>1 | Kramer W, Stengelin S, Baringhaus K-H, et al. Substrate specificity of the ileal and the hepatic Na <sup>+</sup> /bile acid cotransporters of the rabbit. I. Transport studies with membrane vesicles and cell lines expressing the cloned transporters. Journal of Lipid Research. 1999 1999/09/01/;40(9):1604-1617. | Animal |
| 156<br>2 | Richer M, Allard S, Manseau L, et al. Suction-induced blister fluid penetration of cefdinir in healthy volunteers following ascending oral doses. Antimicrobial agents and chemotherapy. 1995;39(5):1082-1086.                                                                                                        | Title  |
| 156<br>3 | Alonso R, Rodríguez-Achaerandio A, Aguirre-Quiñonero A, et al. Supplementary Materials: Molecular Epidemiology, Antimicro-bial Surveillance, and PK/PD Analysis to Guide the Treatment of Neisseria gonorrhoeae Infections.                                                                                           | Title  |

|          |                                                                                                                                                                                                                                                                                                                             |          |
|----------|-----------------------------------------------------------------------------------------------------------------------------------------------------------------------------------------------------------------------------------------------------------------------------------------------------------------------------|----------|
| 156<br>4 | Masoudyfar Z, Elhami S. Surface plasmon resonance of gold nanoparticles as a colorimetric sensor for indirect detection of Cefixime. <i>Spectrochimica Acta Part A: Molecular and Biomolecular Spectroscopy</i> . 2019;211:234-238.                                                                                         | Abstract |
| 156<br>5 | Felmingham D, Feldman C, Hryniewicz W, et al. Surveillance of resistance in bacteria causing community-acquired respiratory tract infections. <i>Clinical Microbiology and Infection</i> . 2002 2002/01/01/;8:12-42.                                                                                                        | Title    |
| 156<br>6 | Nepal A, Hendrie D, Robinson S, et al. Survey of the pattern of antibiotic dispensing in private pharmacies in Nepal [Journal: Article]. <i>BMJ open</i> . 2019;9(10).                                                                                                                                                      | Title    |
| 156<br>7 | Credito KL, Lin G, Pankuch GA, et al. Susceptibilities of <i>Haemophilus influenzae</i> and <i>Moraxella catarrhalis</i> to ABT-773 compared to their susceptibilities to 11 other agents. <i>Antimicrobial agents and chemotherapy</i> . 2001;45(1):67-72.                                                                 | Title    |
| 156<br>8 | Harrison CJ, Woods C, Stout G, et al. Susceptibilities of <i>Haemophilus influenzae</i> , <i>Streptococcus pneumoniae</i> , including serotype 19A, and <i>Moraxella catarrhalis</i> paediatric isolates from 2005 to 2007 to commonly used antibiotics. <i>Journal of Antimicrobial Chemotherapy</i> . 2009;63(3):511-519. | Title    |
| 156<br>9 | Jacobs MR, Bajaksouzian S, Zilles A, et al. Susceptibilities of <i>Streptococcus pneumoniae</i> and <i>Haemophilus influenzae</i> to 10 oral antimicrobial agents based on pharmacodynamic parameters: 1997 US surveillance study. <i>Antimicrobial agents and chemotherapy</i> . 1999;43(8):1901-1908.                     | Title    |
| 157<br>0 | Spangler S, Jacobs M, Pankuch G, et al. Susceptibility of 170 penicillin-susceptible and penicillin-resistant pneumococci to six oral cephalosporins, four quinolones, desacetylcefotaxime, Ro 23-9424 and RP 67829. <i>Journal of Antimicrobial Chemotherapy</i> . 1993;31(2):273-280.                                     | Abstract |
| 157<br>1 | Abo Safe F, Salah N, Rashed M, et al. Susceptibility of Aminoglycoside Resistant <i>Acinetobacter baumannii</i> to Antibiotic Combinations. <i>Egyptian Journal of Microbiology</i> . 2019;54(1):137-147.                                                                                                                   | Title    |

|          |                                                                                                                                                                                                                                                                                                                           |          |
|----------|---------------------------------------------------------------------------------------------------------------------------------------------------------------------------------------------------------------------------------------------------------------------------------------------------------------------------|----------|
| 157<br>2 | Yeo S, Chiew Y, Fung C. Susceptibility of Haemophilus influenzae isolates with known resistance mechanisms to five cephalosporins. <i>Chemotherapy</i> . 1996;42(2):85-89.                                                                                                                                                | Abstract |
| 157<br>3 | Jacobs MR, Bajaksouzian S, Windau A, et al. Susceptibility of Streptococcus pneumoniae, Haemophilus influenzae, and Moraxella catarrhalis to 17 oral antimicrobial agents based on pharmacodynamic parameters: 1998–2001 U.S. Surveillance Study. <i>Clinics in Laboratory Medicine</i> . 2004 2004/06/01/;24(2):503-530. | Title    |
| 157<br>4 | Kessler RE, Fung-Tomc JC. Susceptibility of united states clinical trial isolates to cefprozil and cefaclor. <i>Diagnostic Microbiology and Infectious Disease</i> . 1994 1994/02/01/;18(2):129-132.                                                                                                                      | Title    |
| 157<br>5 | Lee SY, Lee JH, Kim JH, et al. Susceptibility tests of oral antibiotics including cefixime against Escherichia coli, isolated from pediatric patients with community acquired urinary tract infections. <i>Clinical and Experimental Pediatrics</i> . 2006;49(7):777-783.                                                 | Abstract |
| 157<br>6 | Nathwani D, Boyter A, Fegan PG, et al. Switch therapy in community-acquired pneumonia. <i>Archives of Internal Medicine</i> . 1996;156(11):1235-1235.                                                                                                                                                                     | Title    |
| 157<br>7 | Symposia and Oral Presentations. <i>Clinical Microbiology and Infection</i> . 2012 2012/01/01/;18:1-113.                                                                                                                                                                                                                  | Title    |
| 157<br>8 | Asgar MA, Yousuf RI, Shoaib MH, et al. Synergistic Nanocomposites of Different Antibiotics Coupled with Green Synthesized Chitosan-Based Silver Nanoparticles: Characterization, Antibacterial, in vivo Toxicological and Biodistribution Studies. <i>Int J Nanomedicine</i> . 2020;15:7841-7859.                         | Title    |
| 157<br>9 | Kim W-J, KO K-Y, Jung MH, et al. SYNTHESIS AND BIOLOGICAL ACTIVITY OF NOVEL 3-(2-PROPENYL)-CEPHALOSPORINS II. PREPARATION OF PRODRUGS. <i>The Journal of Antibiotics</i> . 1991;44(10):1083-1087.                                                                                                                         | Title    |
| 158<br>0 | Kim W-J, KO K-Y, KIM H, et al. Synthesis and biological activity of novel 3-(2-propenyl)-cephalosporins. I. <i>The Journal of Antibiotics</i> . 1991;44(10):1073-1082.                                                                                                                                                    | Title    |

|          |                                                                                                                                                                                                                                                                                                                |                |
|----------|----------------------------------------------------------------------------------------------------------------------------------------------------------------------------------------------------------------------------------------------------------------------------------------------------------------|----------------|
| 158<br>1 | Mehmood Y, Ghafoor S, Riaz H, et al. Synthesis, analysis and biological studies of transition metal complexes of cefixime.                                                                                                                                                                                     | Abstract       |
| 158<br>2 | Hamashima Y. Synthesis, Biological Properties, and Pharmacokinetics of 7432-S, a New Oral Cephem. Special Publication. 1980 (70):77.                                                                                                                                                                           | Title          |
| 158<br>3 | Farooq S, Haq I-U, Ullah N. Synthesis, characterization and biological evaluation of N-Mannich base derivatives of 2-phenyl-2-imidazoline as potential antioxidants, enzyme inhibitors, antimicrobials, cytotoxic and anti-inflammatory agents. Arabian Journal of Chemistry. 2021 2021/04/01/;14(4):103050.   | Title          |
| 158<br>4 | Sakagami K, Sakai M, Kashi T, et al. [Synthetic cephalosporins. IV. Synthesis and antibacterial activity of 7 beta-[(Z)-2-(2-aminothiazol-4-yl)-2-(O-substituted oxyimino)acetamido]-3-(1,2,3-triazol-1-yl)methyl-3-cephem-4-carboxylic acid and related compounds]. Yakugaku Zasshi. 1989 Dec;109(12):957-61. | Not Accessible |
| 158<br>5 | Sakagami K, Watanabe T, Fukatsu S, et al. [Synthetic cephalosporins. V. Synthesis and antibacterial activity of 3-alkylthio-7 beta-[(Z)-2-(2-aminothiazol-4-yl)-2-(O-substituted oxyimino)acetamido]cephalosporins and related compounds]. Yakugaku Zasshi. 1989 Dec;109(12):913-25.                           | Not Accessible |
| 158<br>6 | Limarkar N, Chavda D, Thakkar V, et al. Systematic Formulation Approach for Development and Evaluation of Cefixime Granules for Pediatric Application. Journal of Pharmaceutical Research. 2022;21(1):14.                                                                                                      | Abstract       |
| 158<br>7 | Li J, Lu Z. Systematic identification of pharmacogenomics information from clinical trials. Journal of Biomedical Informatics. 2012 2012/10/01/;45(5):870-878.                                                                                                                                                 | Title          |
| 158<br>8 | Tanvir SB, Qasim SSB, Shariq A, et al. Systematic review and meta-analysis on efficacy of cefixime for treating gonococcal infections. International Journal of Health Sciences. 2018;12(5):90.                                                                                                                | Title          |
| 158<br>9 | Sadick NS. SYSTEMIC ANTIBIOTIC AGENTS. Dermatologic Clinics. 2001 2001/01/01/;19(1):1-21.                                                                                                                                                                                                                      | Title          |

|          |                                                                                                                                                                                                                                                                                     |        |
|----------|-------------------------------------------------------------------------------------------------------------------------------------------------------------------------------------------------------------------------------------------------------------------------------------|--------|
| 159<br>0 | Table of contents. The American Journal of Medicine. 1988 1988/12/01/;85(6):921-928.                                                                                                                                                                                                | Title  |
| 159<br>1 | Sonam, Chaudhary H, Kumar V. Taguchi design for optimization and development of antibacterial drug-loaded PLGA nanoparticles. International Journal of Biological Macromolecules. 2014 2014/03/01/;64:99-105.                                                                       | Title  |
| 159<br>2 | TELEKES A, HEGEDŰS M, KISS I. Therapeutic drug monitoring and measurement of drug concentrations using mass spectrometry. Medical Applications of Mass Spectrometry: Elsevier; 2008. p. 263-289.                                                                                    | Title  |
| 159<br>3 | Isogai E, Isogai H, Hirose K, et al. Therapeutic effect of anti-TNF- $\alpha$ antibody and levofloxacin (LVFX) in a mouse model of enterohemorrhagic Escherichia coli O157 infection. Comparative Immunology, Microbiology and Infectious Diseases. 2001 2001/10/01/;24(4):217-231. | Title  |
| 159<br>4 | Miyazaki H, Tateda K, Matsumoto T, et al. Therapeutic Efficacies of Penicillin G, Cefotaxime, and Imipenem/Cilastatin against Penicillin-Resistant Pneumococcal Pneumonia in CBA/J Mice. Journal of Infection and Chemotherapy. 1996 1996/01/01/;2(1):34-39.                        | Animal |
| 159<br>5 | Del Rosso J. Therapeutic experience with cefdinir in the treatment of uSSSIs. International journal of clinical practice. 2006;60(10):1313-1316.                                                                                                                                    | Title  |
| 159<br>6 | KM M, Palaniswamy DS, NP D, et al. Therapeutic Importance of Curcumin with a Special Emphasis on Mdr Cancer Cells and the Factors Influencing Pharmacodynamics. Indonesian Journal of Pharmacy. 2021:429-441.                                                                       | Title  |
| 159<br>7 | Raddatz JK, Ostergaard BE, Rotschafer JC. Therapeutic options for cefotaxime in the management of bacterial infections. Diagnostic Microbiology and Infectious Disease. 1995 1995/05/01/;22(1):77-83.                                                                               | Title  |
| 159<br>8 | Paudel KR, Pokhrel P, Shrestha A, et al. Therapeutic practice preference in dentistry: antibiotics, analgesics and antiseptics. Asian Journal of Medical Sciences. 2013;4(4):17-23.                                                                                                 | Title  |



|          |                                                                                                                                                                                                                                                                    |          |
|----------|--------------------------------------------------------------------------------------------------------------------------------------------------------------------------------------------------------------------------------------------------------------------|----------|
| 159<br>9 | Helwig H. Therapy of pediatric infections with cefixime. <i>Infection</i> . 1990;18:S147-9.                                                                                                                                                                        | Abstract |
| 160<br>0 | Singh A, Malhotra D, Singh K, et al. Thiazole derivatives in medicinal chemistry: Recent advancements in synthetic strategies, structure activity relationship and pharmacological outcomes. <i>Journal of Molecular Structure</i> . 2022 2022/10/15/;1266:133479. | Title    |
| 160<br>1 | Donowitz GR. Third Generation Cephalosporins. <i>Infectious Disease Clinics of North America</i> . 1989 1989/09/01/;3(3):595-612.                                                                                                                                  | Abstract |
| 160<br>2 | Speciale A, Blandino G, Nicoletti G. Third generation oral cephalosporins: comparative in vitro kinetics. <i>J Chemother</i> . 1995 May;7 Suppl 1:9-12.                                                                                                            | Abstract |
| 160<br>3 | Rosenfeld RM, Doyle WJ, Swarts JD, et al. Third-generation cephalosporins in the treatment of acute pneumococcal otitis media: an animal study. <i>Archives of Otolaryngology–Head &amp; Neck Surgery</i> . 1992;118(1):49-52.                                     | Animal   |
| 160<br>4 | Foerster S, Unemo M, Hathaway LJ, et al. Time-kill curve analysis and pharmacodynamic functions for in vitro evaluation of antimicrobials against <i>Neisseria gonorrhoeae</i> . <i>bioRxiv</i> . 2015:028506.                                                     | Title    |
| 160<br>5 | Foerster S, Unemo M, Hathaway LJ, et al. Time-kill curve analysis and pharmacodynamic modelling for in vitro evaluation of antimicrobials against <i>Neisseria gonorrhoeae</i> . <i>BMC microbiology</i> . 2016;16(1):1-11.                                        | Title    |
| 160<br>6 | Spangler S, Jacobs M, Appelbaum P. Time-kill studies on susceptibility of nine penicillin-susceptible and-resistant pneumococci to cefditoren compared with nine other beta-lactams. <i>The Journal of antimicrobial chemotherapy</i> . 1997;39(2):141-148.        | Title    |
| 160<br>7 | Tsuji A. Tissue selective drug delivery utilizing carrier-mediated transport systems. <i>Journal of Controlled Release</i> . 1999 1999/11/01/;62(1):239-244.                                                                                                       | Title    |

|      |                                                                                                                                                                                                                                                                                     |                |
|------|-------------------------------------------------------------------------------------------------------------------------------------------------------------------------------------------------------------------------------------------------------------------------------------|----------------|
| 1608 | Begue P, Garabedian N, Quinet B, et al. Tonsil diffusion of cefixime in children. <i>Pathologie-biologie</i> . 1989;37(5):433-436.                                                                                                                                                  | Not Accessible |
| 1609 | DUREJA H, GUPTA S, MADAN AK. Topological models for prediction of pharmacokinetic parameters of cephalosporins using random forest, decision tree and moving average analysis. <i>Scientia Pharmaceutica</i> . 2008;76(3):377-394.                                                  | Abstract       |
| 1610 | Pérez MAC, Sanz MB, Torres LR, et al. A topological sub-structural approach for predicting human intestinal absorption of drugs. <i>European Journal of Medicinal Chemistry</i> . 2004 2004/11/01/;39(11):905-916.                                                                  | Title          |
| 1611 | Fallah Z, Zare EN, Ghomi M, et al. Toxicity and remediation of pharmaceuticals and pesticides using metal oxides and carbon nanomaterials. <i>Chemosphere</i> . 2021 2021/07/01/;275:130055.                                                                                        | Title          |
| 1612 | Gehanno P, Boucot I, Chiche D, et al. Traitement ambulatoire des sinusites aiguës: évaluation comparative du cefuroxime axetil et du cefixime. <i>Médecine et Maladies Infectieuses</i> . 1991;21:61-65.                                                                            | Title          |
| 1613 | Peyramond D, Raffi F, Lucht F, et al. Traitements antibiotiques des angines. Indications, modalités, durées. <i>Médecine et Maladies Infectieuses</i> . 1997 1997/04/01/;27(4):434-449.                                                                                             | Title          |
| 1614 | Matsumoto S, Saito H, Inui K. Transcellular transport of oral cephalosporins in human intestinal epithelial cells, Caco-2: interaction with dipeptide transport systems in apical and basolateral membranes. <i>J Pharmacol Exp Ther</i> . 1994 Aug;270(2):498-504.                 | Abstract       |
| 1615 | Inui K, Yamamoto M, Saito H. Transepithelial transport of oral cephalosporins by monolayers of intestinal epithelial cell line Caco-2: specific transport systems in apical and basolateral membranes. <i>J Pharmacol Exp Ther</i> . 1992 Apr;261(1):195-201.                       | Abstract       |
| 1616 | Faure S, Perrin-Guyomard A, Delmas J-M, et al. Transfer of plasmid-mediated CTX-M-9 from <i>Salmonella enterica</i> serotype Virchow to Enterobacteriaceae in human flora-associated rats treated with cefixime. <i>Antimicrobial agents and chemotherapy</i> . 2010;54(1):164-169. | Animal         |

|          |                                                                                                                                                                                                                                                                                     |          |
|----------|-------------------------------------------------------------------------------------------------------------------------------------------------------------------------------------------------------------------------------------------------------------------------------------|----------|
| 161<br>7 | Wong H, Bohnert T, Damian-Iordache V, et al. Translational pharmacokinetic-pharmacodynamic analysis in the pharmaceutical industry: an IQ Consortium PK-PD Discussion Group perspective. <i>Drug Discovery Today</i> . 2017;22(10):1447-1459.                                       | Title    |
| 161<br>8 | Sugawara M, Iseki K, Miyazaki K, et al. Transport characteristics of ceftibuten, cefixime and cephalixin across human jejunal brush-border membrane. <i>J Pharm Pharmacol</i> . 1991 Dec;43(12):882-4.                                                                              | Abstract |
| 161<br>9 | Wenzel U, Gebert I, Weintraut H, et al. Transport characteristics of differently charged cephalosporin antibiotics in oocytes expressing the cloned intestinal peptide transporter PepT1 and in human intestinal Caco-2 cells. <i>J Pharmacol Exp Ther</i> . 1996 May;277(2):831-9. | Abstract |
| 162<br>0 | Tomita Y, Katsura T, Okano T, et al. Transport mechanisms of bestatin in rabbit intestinal brush-border membranes: role of H <sup>+</sup> /dipeptide cotransport system. <i>J Pharmacol Exp Ther</i> . 1990 Feb;252(2):859-62.                                                      | Animal   |
| 162<br>1 | Dantzig AH, Duckworth DC, Tabas LB. Transport mechanisms responsible for the absorption of loracarbef, cefixime, and cefuroxime axetil into human intestinal Caco-2 cells. <i>Biochim Biophys Acta</i> . 1994 Apr 20;1191(1):7-13.                                                  | Abstract |
| 162<br>2 | Benkhelifa S, Decroix M-O, Arnaud P, et al. Transport of cephalosporins across artificial membranes and rabbit ileum. <i>International Journal of Pharmaceutics</i> . 1996 1996/12/06/;145(1):115-127.                                                                              | Animal   |
| 162<br>3 | Sai Y, Tsuji A. Transporter-mediated drug delivery: recent progress and experimental approaches. <i>Drug Discovery Today</i> . 2004 2004/08/01/;9(16):712-720.                                                                                                                      | Title    |
| 162<br>4 | Pablo Horcajada J, García-Palomo D, Carmen Fariñas M. Tratamiento de las infecciones no complicadas del tracto urinario inferior. <i>Enfermedades Infecciosas y Microbiología Clínica</i> . 2005 2005/12/01/;23:22-27.                                                              | Title    |
| 162<br>5 | Guggenbichler JP, Titz B, Lysy G. Treatment of acute otitis media: comparison between cefixime and cefaclor [Journal: Conference Paper]. <i>Journal of drug development, supplement</i> . 1993;6(1):23-25.                                                                          | Abstract |

|          |                                                                                                                                                                                                                                                            |          |
|----------|------------------------------------------------------------------------------------------------------------------------------------------------------------------------------------------------------------------------------------------------------------|----------|
| 162<br>6 | Stein G, Christensen S, Mummaw N. Treatment of acute uncomplicated urinary tract infection with ceftibuten. <i>Infection</i> . 1991;19(2):124-126.                                                                                                         | Title    |
| 162<br>7 | Wagenlehner FME, Naber KG. Treatment of Bacterial Urinary Tract Infections: Presence and Future. <i>European Urology</i> . 2006 2006/02/01/;49(2):235-244.                                                                                                 | Title    |
| 162<br>8 | Preston SL, Drusano GL. Treatment of Community-Acquired Respiratory Tract Infections with Penicillins and Cephalosporins. <i>Community-Acquired Respiratory Infections: CRC Press; 2003</i> . p. 137-160.                                                  | Abstract |
| 162<br>9 | Weston JS. Treatment of Gram-Positive Infections: Past, Present, and Future. <i>Critical Care Nursing Clinics of North America</i> . 2002 2002/03/01/;14(1):17-29.                                                                                         | Title    |
| 163<br>0 | Vogel F. Treatment of lower respiratory tract infections including pneumonia. Comparative study with i. vl cefotaxime/oral cefixime versus parenteral cefotaxime. <i>Fortschritte der Medizin</i> . 1994;112(28):395-398.                                  | Abstract |
| 163<br>1 | Parry CM. The treatment of multidrug-resistant and nalidixic acid-resistant typhoid fever in Viet Nam. <i>Trans R Soc Trop Med Hyg</i> . 2004 Jul;98(7):413-22.                                                                                            | Title    |
| 163<br>2 | Hollier LM, Workowski K. Treatment of Sexually Transmitted Infections in Pregnancy. <i>Clinics in Perinatology</i> . 2005 2005/09/01/;32(3):629-656.                                                                                                       | Title    |
| 163<br>3 | Martin JM, Pitetti R, Maffei F, et al. Treatment of shigellosis with cefixime: two days vs. five days [Clinical Trial; Comparative Study; Journal Article; Randomized Controlled Trial]. <i>Pediatric infectious disease journal</i> . 2000;19(6):522-526. | Abstract |
| 163<br>4 | Salam MA, Seas C, Khan WA, et al. Treatment of shigellosis: IV. Cefixime is ineffective in shigellosis in adults. <i>Annals of internal medicine</i> . 1995;123(7):505-508.                                                                                | Abstract |
| 163<br>5 | VERDON MS, DOUGLAS JR JM, WIGGINS SD, et al. Treatment of uncomplicated gonorrhea with single doses of 200 mg cefixime. <i>Sexually transmitted diseases</i> . 1993:290-293.                                                                               | Abstract |

|          |                                                                                                                                                                                                                                                                                                     |          |
|----------|-----------------------------------------------------------------------------------------------------------------------------------------------------------------------------------------------------------------------------------------------------------------------------------------------------|----------|
| 163<br>6 | Thompson CN, Karkey A, Dongol S, et al. Treatment Response in Enteric Fever in an Era of Increasing Antimicrobial Resistance: An Individual Patient Data Analysis of 2092 Participants Enrolled into 4 Randomized, Controlled Trials in Nepal. <i>Clin Infect Dis.</i> 2017 Jun 1;64(11):1522-1531. | Title    |
| 163<br>7 | Leonhardt L. Treatment results using cefixime for bacterial respiratory tract infections. <i>Infection.</i> 1990;18:S115-8.                                                                                                                                                                         | Abstract |
| 163<br>8 | Guchev I, Safonova E, Tsoy A. Tsefiksim. Klinicheskaya effektivnost'pri obostrenii netyazhelyoy khronicheskoy obstruktivnoy bolezni legkikh i vliyanie na razvitie retsidivov zabolevaniya. Nablyudatel'naya programma. <i>Consilium Medicum.</i> 2013;15(3):72-78.                                 | Title    |
| 163<br>9 | Irani-Nezhad MH, Jalili R, Kohan E, et al. Tungsten disulfide (WS <sub>2</sub> )/fluorescein ratiometric fluorescent probe for detection of cefixime residues in milk. <i>Environmental Research.</i> 2022;205:112512.                                                                              | Abstract |
| 164<br>0 | Nct. Typhoid Fever: Combined vs. Single Antibiotic Therapy. <a href="https://clinicaltrials.gov/show/NCT02224040">https://clinicaltrials.gov/show/NCT02224040</a> . 2014.                                                                                                                           | Title    |
| 164<br>1 | Furman WL, Navid F, Daw NC, et al. Tyrosine kinase inhibitor enhances the bioavailability of oral irinotecan in pediatric patients with refractory solid tumors. <i>Journal of clinical oncology.</i> 2009;27(27):4599.                                                                             | Title    |
| 164<br>2 | Bignell C, FitzGerald M. UK national guideline for the management of gonorrhoea in adults, 2011. <i>International journal of STD &amp; AIDS.</i> 2011;22(10):541-547.                                                                                                                               | Title    |
| 164<br>3 | EJIKE US, TAREKA-AKPO E. Ultraviolet spectrophotometric determination of cefixime content in some pharmaceutical brands available in the Nigerian market. <i>An International Journal of Advances in Pharmaceutical sciences.</i> 2013;6:2757-59.                                                   | Abstract |
| 164<br>4 | Mahdi I, Bakrim WB, Bitchagno GTM, et al. Unraveling the Phytochemistry, Traditional Uses, and Biological and Pharmacological Activities of <i>Thymus algeriensis</i> Boiss. & Reut. <i>Oxidative Medicine and Cellular Longevity.</i> 2022;2022.                                                   | Title    |

|          |                                                                                                                                                                                                                                                                              |          |
|----------|------------------------------------------------------------------------------------------------------------------------------------------------------------------------------------------------------------------------------------------------------------------------------|----------|
| 164<br>5 | Walsh ML, Johnson CC. Update on Antimicrobial Agents. Nursing Clinics of North America. 1991<br>1991/06/01/;26(2):341-360.                                                                                                                                                   | Title    |
| 164<br>6 | Dutka-Malen S, Courvalin P. Update on glycopeptide resistance in enterococci. Antimicrobial Newsletter.<br>1990 1990/11/01/;7(11):81-86.                                                                                                                                     | Title    |
| 164<br>7 | Barriere SL. Update on new oral cephalosporins. Antimicrobial newsletter. 1992;8(3):21-24.                                                                                                                                                                                   | Abstract |
| 164<br>8 | Cyr SS, Barbee L, Workowski KA, et al. Update to CDC's treatment guidelines for gonococcal infection,<br>2020. Morbidity and Mortality Weekly Report. 2020;69(50):1911.                                                                                                      | Title    |
| 164<br>9 | Lai S, Kitamura K. Update to CDC's Treatment Guidelines for Gonococcal Infection, 2020. Annals of<br>Emergency Medicine. 2021;78(1):49-52.                                                                                                                                   | Title    |
| 165<br>0 | Brink A. Updated guideline for the management of upper respiratory tract infections in South Africa: 2008.<br>Southern African Journal of Epidemiology and Infection. 2008;23(4):27-40.                                                                                      | Title    |
| 165<br>1 | Brink AJ, Cotton MF, Feldman C, et al. Updated recommendations for the management of upper respiratory<br>tract infections in South Africa. SAMJ: South African Medical Journal. 2015;105(5):345-352.                                                                        | Title    |
| 165<br>2 | Fanos V, Mussap M, Osio D, et al. Urinary Excretion of N-Acetyl- $\beta$ -D-Glucosaminidase and Epidermal<br>Growth Factor in Paediatric Patients Receiving Cefixime Prophylaxis for Recurrent Urinary Tract Infections.<br>Clinical Drug Investigation. 2001;21(7):511-518. | Abstract |
| 165<br>3 | Sumirtapura YC, Pamudji JS, Ingriyani N, et al. Urinary excretion profiles of four oral cephalosporins in<br>Indonesian healthy subjects. Acta Pharm Indonesia. 2004;29:50-58.                                                                                               | Abstract |
| 165<br>4 | Schaeffer AJ. Urinary Tract Infection. The Journal of Urology. 1992 1992/07/01/;148(1):241-245.                                                                                                                                                                              | Title    |

|          |                                                                                                                                                                                                                                                                                  |          |
|----------|----------------------------------------------------------------------------------------------------------------------------------------------------------------------------------------------------------------------------------------------------------------------------------|----------|
| 165<br>5 | Drekonja DM, Johnson JR. Urinary Tract Infections. Primary Care: Clinics in Office Practice. 2008<br>2008/06/01;/35(2):345-367.                                                                                                                                                  | Title    |
| 165<br>6 | Reed MD, Blumer JL. Urologic Pharmacology in the Office Setting. Urologic Clinics of North America.<br>1988 1988/11/01;/15(4):737-751.                                                                                                                                           | Title    |
| 165<br>7 | Vajdle O, Šekuljica S, Guzsvány V, et al. Use of carbon paste electrode and modified by gold nanoparticles for selected macrolide antibiotics determination as standard and in pharmaceutical preparations. Journal of Electroanalytical Chemistry. 2020 2020/09/15;/873:114324. | Title    |
| 165<br>8 | Elbe D, Frighetto L, Nickoloff D, et al. Use of cefixime in an IV to oral stepdown program to reduce antimicrobial costs. Formulary. 1998;33(1):54.                                                                                                                              | Abstract |
| 165<br>9 | Bailey CA, Bryla P, Malick AW. The use of the intestinal epithelial cell culture model, Caco-2, in pharmaceutical development. Advanced Drug Delivery Reviews. 1996 1996/11/15;/22(1):85-103.                                                                                    | Title    |
| 166<br>0 | Reisner DP. Uses of macrolide antibiotics in obstetrics and gynecology. Primary Care Update for OB/GYNS.<br>1996 1996/07/01;/3(4):122-127.                                                                                                                                       | Title    |
| 166<br>1 | Harrison CJ. Using antibiotic concentrations in middle ear fluid to predict potential clinical efficacy. The Pediatric infectious disease journal. 1997;16(2):S12-S16.                                                                                                           | Title    |
| 166<br>2 | Al-Tamimi SA, Al-Motlaq NSA, Aly FA. Utility of Spectroscopic Studies for Quantification of Cefditoren Pivoxil in Commercial Samples. Journal of the Chemical Society of Pakistan. 2021;43(4).                                                                                   | Title    |
| 166<br>3 | Dhoka MV, Harale RB, Bankhele SC, et al. Validated HPTLC method for determination of cefixime trihydrate and dicloxacillin sodium in bulk and combined pharmaceutical dosage form. Research Journal of Pharmacy and Technology. 2012;6(5):842-845.                               | Abstract |

|          |                                                                                                                                                                                                                                                                                 |          |
|----------|---------------------------------------------------------------------------------------------------------------------------------------------------------------------------------------------------------------------------------------------------------------------------------|----------|
| 166<br>4 | Dhoka MV, Gawande VT, Joshi PP. Validated HPTLC Method for Determination of Cefixime Trihydrate and Erdosteine in Bulk and combined Pharmaceutical Dosage Form. Eurasian J Anal Chem. 2013;8(3):99-106.                                                                         | Abstract |
| 166<br>5 | Dhara P, Dhananjay M, Vandana P, et al. Validated stability indicating RP-HPLC method development and validation for simultaneous estimation of Cefixime trihydrate and levofloxacin hemihydrate in pharmaceutical dosage form. Int J Anal Tech. 2017;3(1):1-12.                | Abstract |
| 166<br>6 | Jain N, Jain H, Jain P. Validated Stability Indicating RP-HPLC Method for Simultaneous Estimation of Ofloxacin and Cefixime in their Combined Dosage Form. Science, Technology and Arts Research Journal. 2015;3(4):93-98.                                                      | Abstract |
| 166<br>7 | Gawande V, Bothara K, Satija C. Validated stability-indicating HPTLC method for cefixime and azithromycin with preparative isolation, identification, and characterization of degradation products. Acta Chromatographica. 2018;30(4):212-218.                                  | Abstract |
| 166<br>8 | Hassouna M, Abdelrahman M, Mohamed M. Validation of a novel and sensitive RP-HPLC method for simultaneous determination of cefixime trihydrate and sodium benzoate in powder for oral suspension dosage form. Journal of Forensic Sciences & Criminal Investigation. 2017;2(5). | Abstract |
| 166<br>9 | Gehring R. Veterinary-specific applications of pharmacokinetic modelling and theory: Opportunities and challenges: [SI: sn]; 2020.                                                                                                                                              | Title    |
| 167<br>0 | Ghamat SN, Talebpour Z. A vinylpyrrolidone-based thin film microextraction in combination with direct solid-state spectrofluorimetry for determination of sartans in human plasma. Analytica Chimica Acta. 2020 2020/08/08/;1124:146-155.                                       | Title    |



|          |                                                                                                                                                                                                                                                                     |          |
|----------|---------------------------------------------------------------------------------------------------------------------------------------------------------------------------------------------------------------------------------------------------------------------|----------|
| 167<br>1 | Reddy TM, Sreedhar M, Reddy SJ. Voltammetric behavior of Cefixime and Cefpodoxime Proxetil and determination in pharmaceutical formulations and urine. Journal of pharmaceutical and biomedical analysis. 2003;31(4):811-818.                                       | Abstract |
| 167<br>2 | Jain R, Gupta VK, Jadon N, et al. Voltammetric determination of cefixime in pharmaceuticals and biological fluids. Analytical biochemistry. 2010;407(1):79-88.                                                                                                      | Abstract |
| 167<br>3 | Gupta VK, Jain R, Radhapyari K, et al. Voltammetric techniques for the assay of pharmaceuticals—A review. Analytical Biochemistry. 2011 2011/01/15/;408(2):179-196.                                                                                                 | Title    |
| 167<br>4 | Volume 14 (1991) contents. Diagnostic Microbiology and Infectious Disease. 1991 1991/11/01/;14(6):i-ix.                                                                                                                                                             | Title    |
| 167<br>5 | Schentag JJ, Gilliland KK, Paladino JA. What have we learned from pharmacokinetic and pharmacodynamic theories? Clinical Infectious Diseases. 2001;32(Supplement_1):S39-S46.                                                                                        | Title    |
| 167<br>6 | Abbey TC, Deak E. What's New from the CLSI Subcommittee on Antimicrobial Susceptibility Testing M100, 29th Edition. Clinical Microbiology Newsletter. 2019 2019/12/01/;41(23):203-209.                                                                              | Title    |
| 167<br>7 | Ison C, Mouton J, Jones K, et al. Which cephalosporin for gonorrhoea? Sexually transmitted infections. 2004;80(5):386-388.                                                                                                                                          | Abstract |
| 167<br>8 | Unemo M, Lahra MM, Escher M, et al. WHO global antimicrobial resistance surveillance for Neisseria gonorrhoeae 2017–18: a retrospective observational study. The Lancet Microbe. 2021;2(11):e627-e636.                                                              | Title    |
| 167<br>9 | Drond SB, Justribó MV. Will We Still Have Antibiotics Tomorrow? Archivos de Bronconeumología ((English Edition)). 2007 2007/01/01/;43(8):450-459.                                                                                                                   | Title    |
| 168<br>0 | Unemo M, Lahra MM, Cole M, et al. World Health Organization Global Gonococcal Antimicrobial Surveillance Program (WHO GASP): review of new data and evidence to inform international collaborative actions and research efforts. Sexual health. 2019;16(5):412-425. | Title    |

|          |                                                                                                                                                                                                                                       |       |
|----------|---------------------------------------------------------------------------------------------------------------------------------------------------------------------------------------------------------------------------------------|-------|
| 168<br>1 | Bradford PA, Miller AA, O'Donnell J, et al. Zoliflodacin: an oral spiropyrimidinetrione antibiotic for the treatment of Neisseria gonorrhoeae, including multi-drug-resistant isolates. ACS Infectious Diseases. 2020;6(6):1332-1345. | Title |
| 168<br>2 | Neuhauser MM, Danziger LH. $\beta$ -lactam antibiotics. Drug interactions in infectious diseases: Springer; 2005. p. 255-287.                                                                                                         | Title |
| 168<br>3 | Ganapathy ME, Huang W, Rajan DP, et al. $\beta$ -Lactam Antibiotics as Substrates for OCTN2, an Organic Cation/Carnitine Transporter*. Journal of Biological Chemistry. 2000 2000/01/21/;275(3):1699-1707.                            | Title |
| 168<br>4 | Lima LM, Silva BNMD, Barbosa G, et al. $\beta$ -lactam antibiotics: An overview from a medicinal chemistry perspective. European Journal of Medicinal Chemistry. 2020 2020/12/15/;208:112829.                                         | Title |
| 168<br>5 | Miller LA, Ratnam K, Payne DJ. $\beta$ -Lactamase-inhibitor combinations in the 21st century: current agents and new developments. Current Opinion in Pharmacology. 2001 2001/10/01/;1(5):451-458.                                    | Title |
| 168<br>6 | Прохоров Е, Мочалова А, Ершова И, et al. Актуальные вопросы алгоритма диагностики и терапии инфекционных диарей. Актуальная инфектология. 2013 (1 (1)):81-84.                                                                         | Title |
| 168<br>7 | Синякова ЛА, Косова ИВ. Антимикробная терапия неосложненных инфекций мочевых путей. Consilium medicum. 2014;16(7):29-33.                                                                                                              | Title |
| 168<br>8 | Капашева Ш. Гестационный пиелонефрит: опыт применения цефиксима. Наука и здравоохранение. 2013 (6):72-75.                                                                                                                             | Title |
| 168<br>9 | Капашева Ш. ГЕСТАЦИОННОЕ ПИЕЛОНЕФРИТ: ЦЕФИКСИМ ҚОЛДАНУ ТӘЖІРИБЕСІ. Pediatric Infectious Disease. 1987;6:963-970.                                                                                                                      | Title |
| 169<br>0 | Жакиянова Ж, Болсынбекова С, Калибекова А, et al. Имупрет в комплексном лечении гнойного воспаления околоносовых пазух. Наука и здравоохранение. 2013 (6):75-78.                                                                      | Title |

|          |                                                                                                                                                                                                                                                                                                                                                                            |       |
|----------|----------------------------------------------------------------------------------------------------------------------------------------------------------------------------------------------------------------------------------------------------------------------------------------------------------------------------------------------------------------------------|-------|
| 169<br>1 | Белых С. Клинический опыт применения цефалоспоринов 3-го поколения в лечении инфекции мочевыводящих путей. Наука и здравоохранение. 2013 (3):55-56.                                                                                                                                                                                                                        | Title |
| 169<br>2 | Гучев ИА, Рафальский В, Мелехина Е. Роль цефиксима в терапии обострения хронической обструктивной болезни легких. Клин микробиол и антимикробная химиотерапия. 2008;10(3):270-282.                                                                                                                                                                                         | Title |
| 169<br>3 | Пушкарь Д, Зайцев А. Современные пероральные цефалоспорины в лечении инфекций мочевыводящих путей. Вестник практического врача. 2012 (1):3-8.                                                                                                                                                                                                                              | Title |
| 169<br>4 | Говоров АВ, Васильев АО, Пушкарь ДЮ. Тадалафил в лечении симптомов со стороны нижних мочевых путей: обзор литературы и существующей клинической практики в России. Consilium medicum. 2014;16(7):33-41.                                                                                                                                                                    | Title |
| 169<br>5 | Фриго Н, Гучев И, Сидоренко С, et al. Цефалоспорины третьего поколения в лечении гонореи. Вестник дерматологии и венерологии. 2011 (3):34-44.                                                                                                                                                                                                                              | Title |
| 169<br>6 | Гучев И, Сафонова Е, Цой А. Цефиксим. Клиническая эффективность при обострении нетяжелой хронической обструктивной болезни легких и влияние на развитие рецидивов заболевания. Наблюдательная программа. ведения пациента Терапевтические особенности и возможности • Внебольничная пневмония Критерии тяжести Оценка прогноза Схемы антимикробной терапии. 2013;15(3):72. | Title |
| 169<br>7 | Гучев ИА, Сафонова ЕВ. Цефиксим. Роль перорального цефалоспоринона III поколения при обострении хронической обструктивной болезни легких. Фарматека. 2011 (4):64-69.                                                                                                                                                                                                       | Title |
| 169<br>8 | تأثير تجویز سوسپانسیون سفیکسیم در درمان سرپایی پیلونیفریت حاد کودکان. et al. شمس, سیدزاده, Journal of Advances in Medical and Biomedical Research. 2004;12(48):15-21.                                                                                                                                                                                                      | Title |

|          |                                                                                                                                                            |       |
|----------|------------------------------------------------------------------------------------------------------------------------------------------------------------|-------|
| 169<br>9 | 이수영, 이정현, 김종현, et al. 소아 원외 요로감염 환자에서 분리된 E. coli 에 대한 cefixime 을 포함한 경구 항생제의 감수성 연구. Korean Journal of Pediatrics. 2006;49(7).                            | Title |
| 170<br>0 | 강원구, 권광일, 우종수. 지원자의 Cefixime 캡셀제 생체이용율에 대한 생물학적동등성 연구. 한국임상약학회지. 1998;8(1):19-22.                                                                          | Title |
| 170<br>1 | 노현구, 박기배, 이광표. 흰쥐의 비강과 공장에서의 Cefixime 의 흡수기전. 정기총회 및 학술대회. 1993;42:225-225.                                                                                | Title |
| 170<br>2 | 闫晓霞, 李源远, 李建伟. 不同处方头孢克肟胶囊在比格犬体内的药动学. 中国抗生素杂志. 2020;45(05):513-518.                                                                                         | Title |
| 170<br>3 | 中村竜也, 高橋伯夫. 各種臨床分離株の経口セフェム系薬に対する薬剤感受性と Pharmacokinetics/Pharmacodynamics (PK/PD) 理論を用いたその有効性について. The Japanese Journal of Antibiotics. 2004;57(6):465-474. | Title |
| 170<br>4 | 周颖, 孙培红, 赵侠, et al. 头孢克肟在中国健康男性志愿者的群体药代动力学研究. 临床药物治疗杂志. 2005;3(4):49-54.                                                                                   | Title |
| 170<br>5 | 中村はるひ, 岩井直一. 小児期における経口抗生物質についての薬動学的検討 (第 1 報) 小児期における Cefixime の薬動学的検討. The Japanese Journal of Antibiotics. 1991;44(9):964-978.                           | Title |
| 170<br>6 | 宮崎正章, 貴田嘉一, 松田博, et al. 小児科領域における Cefixime の基礎的, 臨床的検討. The Japanese Journal of Antibiotics. 1986;39(4):1166-1175.                                         | Title |

|          |                                                                                                                     |       |
|----------|---------------------------------------------------------------------------------------------------------------------|-------|
| 170<br>7 | 岩井直一, 柴田元博, 溝口文子, et al. 小児科領域における Cefixime の基礎的, 臨床的検討. The Japanese Journal of Antibiotics. 1986;39(4):1087-1105. | Title |
| 170<br>8 | 西村忠史, 高島俊夫, 田吹和雄, et al. 小児科領域における Cefixime の基礎的, 臨床的検討. The Japanese Journal of Antibiotics. 1986;39(4):1115-1127. | Title |
| 170<br>9 | 倉繁隆信, 森田英雄, 荒木久美子, et al. 小児科領域における Cefixime の臨床的検討. The Japanese Journal of Antibiotics. 1986;39(4):1157-1165.     | Title |
| 171<br>0 | 目黒英典, 有益修, 宗田英幸, et al. 小児科領域における Cefixime の臨床的検討. The Japanese Journal of Antibiotics. 1986;39(4):1007-1019.       | Title |
| 171<br>1 | 中澤進, 佐藤肇, 成田章, et al. 小児科領域における Cefixime 細粒に関する検討. The Japanese Journal of Antibiotics. 1986;39(4):1020-1034.       | Title |
| 171<br>2 | 三河春樹, 真弓光文, 秋山義之, et al. 小児科領域感染症における Cefixime の臨床的検討. The Japanese Journal of Antibiotics. 1989;42(12):2527-2539.  | Title |
| 171<br>3 | 島田馨. 総説 [最新の抗菌薬 XXIII] Cefixime. The Japanese Journal of Antibiotics. 1987;40(9):1537-1548.                         | Title |
| 171<br>4 | 前田浩志, 佐古政典, 藤井明, et al. 腎機能障害例における Cefixime の体内動態. The Japanese Journal of Antibiotics. 1986;39(10):2716-2720.      | Title |
| 171<br>5 | 中野博, 世古昭三, 仁平寛巳, et al. 腎機能障害者における cefixime (CFIX) の体内動態. CHEMOTHERAPY. 1988;36(5):428-436.                         | Title |
| 171<br>6 | 張蓉琴, 李銅鈴, 鄢琳, et al. 頭孢克肟咀嚼片與膠囊的相對生物利用度比較. 中國新藥與臨床雜誌. 2004;23(12):856-858.                                          | Title |

|          |                                                                                                                                                                                                                           |                   |
|----------|---------------------------------------------------------------------------------------------------------------------------------------------------------------------------------------------------------------------------|-------------------|
| 171<br>7 | DÜRckheimer W, Adam F, Fischer G, et al. Recent Developments in the Field of Cephem Antibiotics. In: Testa B, editor. Advances in Drug Research. Vol. 17: Academic Press; 1988. p. 61-234.                                | Title             |
| 171<br>8 | MacGowan AP, Wise R. Establishing MIC breakpoints and the interpretation of in vitro susceptibility tests. Journal of Antimicrobial Chemotherapy. 2001;48(suppl_1):17-28.                                                 | Title             |
| 171<br>9 | Faulkner RD, Fernandez P, Lawrence G, et al. Absolute bioavailability of cefixime in man. J Clin Pharmacol. 1988 Aug;28(8):700-6.                                                                                         | Extensive reading |
| 172<br>0 | Faulkner R, Yocobi L, Barone J, et al. al. e: Pharmacokinetic profile of cefixime in man. Pediatric Infectious Disease 1987b; 6: 963-970. 1987.                                                                           | Extensive reading |
| 172<br>1 | Kamran M, Khan MA, ur Rehman M, et al. Binary Solid Lipid Nanosuspension Containing Cefixime: Preparation, Characterization and Comparative In-vivo Evaluation. Beilstein Archives. 2019;2019(1):109.                     | Animal            |
| 172<br>2 | Turner JV, Maddalena DJ, Cutler DJ, et al. Multiple pharmacokinetic parameter prediction for a series of cephalosporins. Journal of pharmaceutical sciences. 2003;92(3):552-559.                                          | Extensive reading |
| 172<br>3 | García-Rodríguez J, Bellido JM, Sánchez JG. Oral cephalosporins: current perspectives. International journal of antimicrobial agents. 1995;5(4):231-243.                                                                  | Title             |
| 172<br>4 | Dandekar PK, Nicolau DP. Pharmacodynamic considerations for the selection of oral cephalosporins in the treatment of rhinosinusitis. Otolaryngology - Head and Neck Surgery. 2002 2002/12/01/;127(6, Supplement):S10-S16. | Title             |
| 172<br>5 | Liu P, Müller M, Derendorf H. Rational dosing of antibiotics: the use of plasma concentrations versus tissue concentrations. International journal of antimicrobial agents. 2002;19(4):285-290.                           | Title             |
| 172<br>6 | MacGowan AP, Bowker KE. Sequential antimicrobial therapy: pharmacokinetic and pharmacodynamic considerations in sequential therapy. Journal of Infection. 1998 1998/07/01/;37:30-36.                                      | Extensive reading |

|          |                                                                                                                            |       |
|----------|----------------------------------------------------------------------------------------------------------------------------|-------|
| 172<br>7 | Rimmer D. Third generation cephalosporins in the parenteral to oral switch. <i>Pharmacoeconomics</i> .<br>1994;5(2):27-33. | Title |
|----------|----------------------------------------------------------------------------------------------------------------------------|-------|

**Supplementary Table 3: JADAD Scoring**

| <b>JADAD Questions</b>           |                                       |                                                                                         |                                         |                                                             |                                                     |             |
|----------------------------------|---------------------------------------|-----------------------------------------------------------------------------------------|-----------------------------------------|-------------------------------------------------------------|-----------------------------------------------------|-------------|
| Reference                        | Was the study described as randomized | Was the method used to generate the sequence of randomization described and appropriate | Was the study described as double blind | Was the method of double blinding described and appropriate | Was there a description of withdrawals and dropouts | Total score |
| David C. Brittain et.al(1985)    | 1                                     | 1                                                                                       | 1                                       | 1                                                           | 0                                                   | 4           |
| Mitsuyoshi NAKASHIMA et.al(1986) | 1                                     | 1                                                                                       | 0                                       | 0                                                           | 0                                                   | 2           |



|                                     |   |   |   |   |   |   |
|-------------------------------------|---|---|---|---|---|---|
| D. R. P. GUAY et.al(1986)           | 0 | 0 | 0 | 0 | 0 | 0 |
| ROBERT,D FAULKNER<br>et.al(1987)    | 0 | 0 | 0 | 0 | 0 | 0 |
| Mitsuyoshi Nakashima<br>et.al(1987) | 0 | 0 | 0 | 0 | 0 | 0 |
| R. D. Faulkner et.al(1988)          | 1 | 1 | 0 | 0 | 0 | 2 |
| R. D. Faulkneret.al(1988)           | 0 | 0 | 0 | 0 | 0 | 0 |
| CARL ERIK NORD<br>et.al(1988)       | 0 | 0 | 0 | 0 | 0 | 0 |
| Robert D. Faulkner<br>et.al(1988)   | 1 | 1 | 0 | 0 | 0 | 2 |
| DANIEL P. HEALY<br>et,al(1989)      | 1 | 1 | 0 | 0 | 0 | 2 |
| J. W. Stone et.al(1989)             | 0 | 0 | 0 | 0 | 0 | 0 |
| ROBERT D. FAULKNER<br>et.al(1989)   | 1 | 1 | 0 | 0 | 0 | 2 |
| D. Trenk et.al(1990)                | 1 | 0 | 0 | 0 | 0 | 1 |
| G. Montay et.al(1991)               | 1 | 1 | 0 | 0 | 0 | 2 |
| M. Dhib et.al(1991)                 | 0 | 0 | 0 | 0 | 0 | 0 |

|                                   |   |   |   |   |   |   |
|-----------------------------------|---|---|---|---|---|---|
| CHANTAL DUVERNE<br>et.al(1992)    | 1 | 1 | 0 | 0 | 0 | 2 |
| J. F. WESTPHAL<br>et.al(1993)     | 0 | 0 | 0 | 0 | 0 | 0 |
| Milap C.Nahata<br>et.al(1993)     | 0 | 0 | 0 | 0 | 0 | 0 |
| Katerina Mamzoridi<br>et.al(1996) | 0 | 0 | 0 | 0 | 0 | 0 |
| X.D. LIU et.al(1997)              | 0 | 0 | 0 | 0 | 0 | 0 |
| David E. Nix et.al(1997)          | 1 | 1 | 0 | 0 | 1 | 3 |
| YOSHIKIYO<br>TOYONAGA(1997)       | 0 | 0 | 0 | 0 | 0 | 0 |
| H. CARSENTI-ETESSE<br>et.al(1998) | 1 | 1 | 1 | 1 | 0 | 4 |
| E. Evene et,al(2001)              | 1 | 1 | 0 | 0 | 0 | 2 |
| Takashi Deguchi<br>et.al(2003)    | 0 | 0 | 0 | 0 | 0 | 0 |
| Y.A.Asiriet.al(2005)              | 0 | 0 | 0 | 0 | 0 | 0 |
| Ping Liu et.al(2005)              | 1 | 1 | 0 | 0 | 0 | 2 |
| Dong Hyun Choi<br>et.al(2007)     | 1 | 1 | 0 | 0 | 1 | 3 |

|                                      |   |   |   |   |   |   |
|--------------------------------------|---|---|---|---|---|---|
| Parvin Zakeri-Milani<br>et.al(2008)  | 1 | 1 | 0 | 0 | 1 | 3 |
| Tawfeeg A.<br>Najjaet.al(2009)       | 0 | 0 | 0 | 0 | 0 | 0 |
| Abbas Khan et.al(2011)               | 0 | 0 | 0 | 0 | 0 | 0 |
| Saiprasad Patil et.al(2014)          | 1 | 1 | 0 | 0 | 0 | 2 |
| Hossein Danafar<br>et.al(2016)       | 1 | 1 | 0 | 0 | 1 | 3 |
| Lindley A. Barbee<br>et.al(2018)     | 1 | 0 | 0 | 0 | 1 | 2 |
| Muhammad Waqas<br>Khadam et.al(2019) | 0 | 0 | 0 | 0 | 0 | 0 |
| Sara Aset.al(2020)                   | 1 | 1 | 0 | 0 | 1 | 3 |
| Esraa Ghazy Jabbar<br>et.al(2021)    | 1 | 1 | 0 | 0 | 1 | 3 |
| Yuli Subiakt et.al(2022)             | 1 | 1 | 1 | 1 | 0 | 4 |

**Supplementary Table 4: Critical Appraisal Skill Program**

| CASP Questions                   |                                                          |                                           |                                                                          |                                                                                        |                                                                     |                                                                    |                                                                                      |                                                    |                                              |                                         |            |
|----------------------------------|----------------------------------------------------------|-------------------------------------------|--------------------------------------------------------------------------|----------------------------------------------------------------------------------------|---------------------------------------------------------------------|--------------------------------------------------------------------|--------------------------------------------------------------------------------------|----------------------------------------------------|----------------------------------------------|-----------------------------------------|------------|
| Reference                        | Was there a clear statement of the aims of the research? | Is a qualitative methodology appropriate? | Was the research design appropriate to address the aims of the research? | Are the study's theoretical underpinnings clear, consistent and conceptually coherent? | Was the recruitment strategy appropriate to the aims of the search? | Was the data collected in a way that addressed the research issue? | Has the relationship between researcher and participants been adequately considered? | Have ethical issues been taken into consideration? | Was the data analysis sufficiently rigorous? | Is there a clear statement of findings? | CASP Score |
| David C. Brittain et.al(1985)    | Y                                                        | Y                                         | Y                                                                        | Y                                                                                      | Y                                                                   | Y                                                                  | CT                                                                                   | N                                                  | Y                                            | Y                                       | 8          |
| Mitsuyoshi NAKASHIMA et.al(1986) | Y                                                        | Y                                         | Y                                                                        | Y                                                                                      | Y                                                                   | Y                                                                  | N                                                                                    | Y                                                  | Y                                            | Y                                       | 9          |

|                                        |   |   |   |   |   |   |    |   |   |   |   |
|----------------------------------------|---|---|---|---|---|---|----|---|---|---|---|
| D. R. P.<br>GUAY<br>et.al(1986)        | Y | Y | Y | Y | Y | Y | CT | N | Y | Y | 8 |
| ROBERT,D<br>FAULKNER<br>et.al(1987)    | Y | Y | Y | Y | Y | Y | CT | Y | Y | Y | 9 |
| Mitsuyoshi<br>Nakashima<br>et.al(1987) | Y | Y | Y | Y | Y | Y | N  | Y | Y | Y | 9 |
| R. D. Faulkner<br>et.al(1988)          | Y | Y | Y | Y | Y | Y | Y  | N | Y | Y | 9 |
| R. D.<br>Faulkneret.al(1<br>988)       | Y | Y | Y | Y | Y | Y | CT | N | Y | Y | 8 |
| CARL ERIK<br>NORD<br>et.al(1988)       | Y | Y | Y | Y | Y | Y | N  | Y | Y | Y | 9 |
| Robert D.<br>Faulkner<br>et.al(1988)   | Y | Y | Y | Y | Y | Y | CT | Y | Y | Y | 9 |

|                                      |   |   |    |   |   |   |    |   |   |   |   |
|--------------------------------------|---|---|----|---|---|---|----|---|---|---|---|
| DANIEL P.<br>HEALY<br>et.al(1989)    | Y | Y | Y  | Y | Y | Y | CT | N | Y | Y | 8 |
| J. W. Stone<br>et.al(1989)           | Y | Y | CT | Y | Y | Y | CT | Y | Y | Y | 8 |
| ROBERT D.<br>FAULKNER<br>et.al(1989) | Y | Y | Y  | Y | Y | Y | N  | Y | Y | Y | 9 |
| D. Trenk<br>et.al(1990)              | Y | Y | Y  | Y | Y | Y | N  | Y | Y | Y | 9 |
| G. Montay<br>et.al(1991)             | Y | Y | Y  | Y | Y | Y | N  | N | Y | Y | 8 |
| M. Dhib<br>et.al(1991)               | Y | Y | Y  | Y | Y | Y | CT | Y | Y | Y | 9 |
| CHANTAL<br>DUVERNE<br>et.al(1992)    | Y | Y | Y  | Y | Y | Y | N  | Y | Y | Y | 9 |
| J. F.<br>WESTPHAL<br>et.al(1993)     | Y | Y | CT | Y | Y | Y | CT | Y | Y | Y | 8 |

|                                          |   |    |    |    |    |   |    |   |   |   |    |
|------------------------------------------|---|----|----|----|----|---|----|---|---|---|----|
| Milap<br>C.Nahata<br>et.al(1993)         | Y | Y  | Y  | Y  | Y  | Y | CT | N | Y | Y | 8  |
| Katerina<br>Mamzoridi<br>et.al(1996)     | Y | Y  | Y  | Y  | CT | Y | N  | N | Y | Y | 7  |
| X.D. LIU<br>et.al(1997)                  | Y | Y  | Y  | Y  | Y  | Y | N  | N | Y | Y | 8  |
| David E. Nix<br>et.al(1997)              | Y | Y  | Y  | Y  | Y  | Y | Y  | N | Y | Y | 9  |
| YOSHIKIYO<br>TOYONAGA(<br>1997)          | Y | CT | CT | Y  | Y  | Y | Y  | N | Y | Y | 7  |
| H.<br>CARSENTI-<br>ETESSE<br>et.al(1998) | Y | Y  | Y  | CT | Y  | Y | N  | N | Y | Y | 7  |
| E. Evene<br>et,al(2001)                  | Y | Y  | Y  | Y  | Y  | Y | Y  | Y | Y | Y | 10 |
| Takashi<br>Deguchi<br>et.al(2003)        | Y | Y  | Y  | Y  | Y  | Y | CT | N | Y | Y | 8  |

|                                  |   |   |    |    |   |   |   |   |   |   |    |
|----------------------------------|---|---|----|----|---|---|---|---|---|---|----|
| Y.A.Asiriet.al(2005)             | Y | Y | Y  | Y  | Y | Y | N | N | Y | Y | 8  |
| Ping Liu et.al(2005)             | Y | Y | Y  | Y  | Y | Y | N | N | Y | Y | 8  |
| Dong Hyun Choi et.al(2007)       | Y | Y | Y  | Y  | Y | Y | N | Y | Y | Y | 9  |
| Parvin Zakeri-Milani et.al(2008) | Y | Y | Y  | Y  | Y | Y | N | Y | Y | Y | 9  |
| Tawfeeg A. Najjaet.al(2009)      | Y | Y | Y  | Y  | Y | Y | Y | Y | Y | Y | 10 |
| Abbas Khan et.al(2011)           | Y | Y | CT | Y  | Y | Y | N | Y | Y | Y | 8  |
| Saiprasad Patil et.al(2014)      | Y | Y | Y  | CT | Y | Y | N | Y | Y | Y | 8  |
| Hossein Danafar et.al(2016)      | Y | Y | Y  | Y  | Y | Y | N | N | Y | Y | 8  |



|                                            |   |   |   |    |   |   |   |   |   |   |    |
|--------------------------------------------|---|---|---|----|---|---|---|---|---|---|----|
| Lindley A.<br>Barbee<br>et.al(2018)        | Y | Y | Y | Y  | Y | Y | Y | N | Y | Y | 9  |
| Muhammad<br>Waqas<br>Khadam<br>et.al(2019) | Y | Y | Y | Y  | Y | Y | N | N | Y | Y | 8  |
| Sara<br>Aset.al(2020)                      | Y | Y | Y | CT | Y | Y | Y | N | Y | Y | 8  |
| Esraa Ghazy<br>Jabbar<br>et.al(2021)       | Y | Y | Y | Y  | Y | Y | Y | Y | Y | Y | 10 |
| Yuli Subiakt<br>et.al(2022)                | Y | Y | Y | Y  | Y | Y | N | Y | Y | Y | 9  |

Y: yes, N: no, CT: cannot tell.

**Supplementary Table 5: Critical Appraisal Clinical Pharmacokinetic Tool**

| Reference studies         |   |   |   |   |   |   |   |   |   |    |    |    |    |    |    |    |    |    |    |    |    |    |    |    |    |    |    |    |    |    |    |    |    |    |    |    |    |    |   |   |   |
|---------------------------|---|---|---|---|---|---|---|---|---|----|----|----|----|----|----|----|----|----|----|----|----|----|----|----|----|----|----|----|----|----|----|----|----|----|----|----|----|----|---|---|---|
| Q<br>ue<br>sti<br>on<br>s | 1 | 2 | 3 | 4 | 5 | 6 | 7 | 8 | 9 | 10 | 11 | 12 | 13 | 14 | 15 | 16 | 17 | 18 | 19 | 20 | 21 | 22 | 23 | 24 | 25 | 26 | 27 | 28 | 29 | 30 | 31 | 32 | 33 | 34 | 35 | 36 | 37 | 38 |   |   |   |
| Q<br>1                    | Y | Y | Y | Y | Y | Y | Y | Y | Y | Y  | Y  | Y  | Y  | Y  | Y  | Y  | Y  | Y  | Y  | Y  | Y  | Y  | Y  | Y  | Y  | Y  | Y  | Y  | Y  | Y  | Y  | Y  | Y  | Y  | Y  | Y  | Y  | Y  | Y |   |   |
| Q<br>2                    | Y | Y | Y | Y | Y | Y | Y | Y | Y | Y  | Y  | Y  | Y  | Y  | Y  | Y  | Y  | Y  | Y  | Y  | Y  | Y  | Y  | Y  | Y  | Y  | Y  | Y  | Y  | Y  | Y  | Y  | Y  | Y  | Y  | Y  | Y  | Y  | Y | Y |   |
| Q<br>3                    | Y | Y | Y | Y | Y | Y | Y | Y | Y | Y  | Y  | Y  | Y  | Y  | Y  | Y  | Y  | N  | N  | Y  | Y  | N  | Y  | Y  | N  | Y  | Y  | N  | Y  | Y  | N  | Y  | Y  | N  | Y  | Y  | Y  | Y  | N | Y | Y |

|         |   |   |   |   |   |   |   |   |   |   |   |   |   |   |   |   |   |   |   |   |   |   |   |   |   |   |   |   |   |   |   |   |   |   |   |   |   |   |   |
|---------|---|---|---|---|---|---|---|---|---|---|---|---|---|---|---|---|---|---|---|---|---|---|---|---|---|---|---|---|---|---|---|---|---|---|---|---|---|---|---|
| Q<br>4  | Y | Y | Y | Y | Y | Y | Y | Y | Y | Y | Y | Y | Y | Y | Y | Y | Y | Y | Y | Y | N | Y | Y | N | N | Y | Y | Y | N | Y | N | N | Y | Y | Y | Y |   |   |   |
| Q<br>5  | Y | Y | Y | Y | Y | Y | Y | Y | Y | Y | Y | Y | Y | Y | Y | Y | Y | Y | Y | Y | Y | Y | Y | Y | Y | Y | Y | Y | Y | Y | Y | Y | Y | Y | Y | Y |   |   |   |
| Q<br>6  | N | N | N | N | N | N | N | N | N | Y | N | N | N | N | Y | N | N | N | N | N | Y | N | Y | N | N | N | N | N | N | N | N | N | N | N | N | Y | Y | Y |   |
| Q<br>7  | Y | Y | Y | Y | Y | Y | Y | Y | Y | Y | Y | Y | Y | Y | Y | Y | Y | Y | Y | N | Y | Y | Y | Y | N | Y | Y | Y | N | Y | N | Y | Y | Y | N | Y |   |   |   |
| Q<br>8  | Y | Y | Y | Y | N | N | Y | N | N | N | N | Y | N | N | Y | Y | Y | N | Y | N | N | N | N | N | N | N | N | N | N | N | N | N | N | N | N | N | N |   |   |
| Q<br>9  | Y | Y | N | Y | Y | Y | Y | N | Y | Y | N | Y | Y | Y | Y | N | Y | N | Y | Y | Y | N | Y | Y | Y | Y | Y | Y | Y | Y | Y | N | Y | N | Y | Y | Y | N |   |
| Q<br>10 | Y | Y | Y | Y | Y | Y | Y | Y | Y | Y | Y | Y | Y | Y | Y | Y | Y | Y | Y | Y | N | Y | Y | Y | Y | Y | Y | Y | Y | Y | Y | Y | Y | N | Y | Y | Y | Y | Y |
| Q<br>11 | Y | Y | Y | Y | Y | Y | Y | Y | Y | Y | Y | Y | Y | Y | Y | Y | Y | Y | Y | y | Y | Y | N | Y | Y | Y | Y | Y | Y | Y | Y | Y | Y | N | Y | Y | Y | Y | Y |



|                                |             |             |             |             |             |             |             |             |             |             |             |             |             |             |             |             |             |             |             |             |             |             |             |             |             |             |             |             |             |             |             |             |             |             |             |        |        |
|--------------------------------|-------------|-------------|-------------|-------------|-------------|-------------|-------------|-------------|-------------|-------------|-------------|-------------|-------------|-------------|-------------|-------------|-------------|-------------|-------------|-------------|-------------|-------------|-------------|-------------|-------------|-------------|-------------|-------------|-------------|-------------|-------------|-------------|-------------|-------------|-------------|--------|--------|
| Q<br>20                        | I<br>D<br>K | I<br>D<br>K | I<br>D<br>K | I<br>D<br>K | I<br>D<br>K | I<br>D<br>K | I<br>D<br>K | I<br>D<br>K | I<br>D<br>K | I<br>D<br>K | I<br>D<br>K | I<br>D<br>K | I<br>D<br>K | I<br>D<br>K | I<br>D<br>K | I<br>D<br>K | I<br>D<br>K | I<br>D<br>K | I<br>D<br>K | I<br>D<br>K | I<br>D<br>K | I<br>D<br>K | I<br>D<br>K | I<br>D<br>K | I<br>D<br>K | I<br>D<br>K | I<br>D<br>K | I<br>D<br>K | I<br>D<br>K | I<br>D<br>K | I<br>D<br>K | I<br>D<br>K | I<br>D<br>K | I<br>D<br>K | I<br>D<br>K |        |        |
| Q<br>21                        | Y           | Y           | Y           | Y           | Y           | Y           | Y           | Y           | Y           | Y           | I<br>D<br>K | Y           | Y           | Y           | Y           | Y           | Y           | I<br>D<br>K | I<br>D<br>K | I<br>D<br>K | Y           | Y           | Y           | Y           | Y           | Y           | Y           | Y           | Y           | Y           | Y           | Y           | Y           | Y           | Y           | Y      |        |
| T<br>ot<br>al<br>sc<br>or<br>e | 1<br>6      | 1<br>5      | 1<br>5      | 1<br>5      | 1<br>4      | 1<br>5      | 1<br>6      | 1<br>3      | 1<br>4      | 1<br>5      | 1<br>1      | 1<br>6      | 1<br>3      | 1<br>4      | 1<br>6      | 1<br>3      | 1<br>4      | 9<br>2      | 1<br>2      | 1<br>2      | 1<br>6      | 8<br>3      | 1<br>6      | 1<br>1      | 1<br>1      | 1<br>4      | 1<br>3      | 1<br>4      | 1<br>5      | 1<br>3      | 1<br>0      | 1<br>1      | 1<br>2      | 1<br>0      | 1<br>3      | 1<br>3 | 1<br>3 |

Q1: Was a clear description of the objectives of the study provided? Q2: Was a valid and comprehensive rationale provided to support the purpose of the study? Q3: Was the chosen study design appropriately selected and justified? Q4: Was the dosing (dose, route of administration, dosing interval) of the drug in the study justified for the intended study? Q5: Were the endpoints of the study appropriate to answer the objectives of the study? Q6: Were the exclusion criteria of participants included AND appropriate for the intended outcomes of the study? Q7: Q8: Where applicable, were the relevant baseline characteristics of the participants adequately described? Q9: Were plausible interacting covariates described a priori or in post hoc evaluation? Q10: Was the description of the used sample analysis methods or citations of prior validation studies provided in the publication or affiliated appendix? Q11: Was the method of data sampling appropriate for the study? Q12: Was a clear description of the sampling site and the sampling interval (the exact times at which samples are obtained) provided and justified? Q13: Was the number of half-lives elapsed within the sampling

period appropriate for the analyzed drug? Q14: Were sample storage conditions appropriate and described in a manner that could be accurately replicated? Q15: If applicable, was there a clear description of the pharmacokinetic model, its development, validation and justification for use? Q16: Was the described population pharmacokinetic approach validation method appropriate for the analysis? Q17: Were the essential pharmacokinetic parameters required to make the results applicable in clinical settings addressed? Q18: Were the pharmacokinetic equations used to calculate patient pharmacokinetic parameters disclosed or cited within the article? Q19: Were the chosen statistical tests and software to perform the statistical analysis appropriate to achieve the study objectives? Q20: Were all patients enrolled in the study accounted for? Q21: In the event of missing data or outliers, was the process for analysis justified and appropriate? Q22: Were appropriate summary statistics to describe centrality and variance used to document the pharmacokinetic results?

1:David C. Brittain et.al(1985), 2:Mitsuyoshi NAKASHIMA et.al(1986), 3:D. R. P. GUAY et.al(1986), 4:ROBERT,D FAULKNER et.al(1987), 5:Mitsuyoshi Nakashima et.al(1987), 6:R. D. Faulkner et.al(1988), 7:R. D. Faulkneret.al(1988), 8:CARL ERIK NORD et.al(1988), 9:Robert D.Faulkner et.al(1988), 10:DANIEL P. HEALY et.al(1989), 11:J. W. Stone et.al(1989), 12:ROBERT D. FAULKNER et.al(1989), 13:D. Trenk et.al(1990), 14:G. Montay et.al(1991), 15:M. Dhib et.al(1991), 16:CHANTAL DUVERNE et.al(1992), 17:J. F. WESTPHAL et.al(1993), 18:Milap C.Nahata et.al(1993), 19: Katerina Mamzoridi et.al(1996), 20: X.D. LIU et.al(1997), 21: David E. Nix et.al(1997), 22:YOSHIKIYO TOYONAGA(1997), 23:H. CARSENTIETESSE et.al(1998), 24:E. Evene et.al(2001), 25:Takashi Deguchi et.al(2003), 26:Y.A.Asiriet.al(2005), 27: Ping Liu et.al(2005), 28:, Dong Hyun Choi et.al(2007), 29:Parvin Zakeri-Milani et.al(2008), 30:Tawfeeg A. Najjaet.al(2009), 31:Abbas Khan et.al(2011), 32:Saiprasad Patil et.al(2014), 33:Hossein Danafar et.al(2016),34:Lindley A. Barbee et.al(2018), 35: Muhammad Waqas Khadam et.al(2019). 36:Sara Aset.al(2020), 37: Esraa Ghazy Jabbar et.al(2021), 38:Yuli Subiakt et.al(2022)

Y: yes, N: no, IDK: I do not know.

**Supplementary Table 6 : Cochrane Collaboration Tool**

| <b>Cochrane Collaboration Questions</b> |                                         |                                               |                                                                |                                                       |                                                 |                                             |                   |                    |
|-----------------------------------------|-----------------------------------------|-----------------------------------------------|----------------------------------------------------------------|-------------------------------------------------------|-------------------------------------------------|---------------------------------------------|-------------------|--------------------|
| <b>Reference</b>                        | <b>Random sequence (selection bias)</b> | <b>Allocaton concealment (selection bias)</b> | <b>Binding of participant and researchers (performed bias)</b> | <b>Binding of outcome assessment (detection bias)</b> | <b>Incomplete outcome data (attrition bias)</b> | <b>Selective reporting (reporting bias)</b> | <b>Other bias</b> | <b>Total score</b> |
| David C. Brittain<br>et.al(1985)        | LR                                      | UR                                            | LR                                                             | UR                                                    | HR                                              | LR                                          | LR                | 4                  |
| Mitsuyoshi<br>NAKASHIMA<br>et.al(1986)  | LR                                      | UR                                            | UR                                                             | HR                                                    | UR                                              | LR                                          | LR                | 3                  |
| D. R. P. GUAY<br>et.al(1986)            | UR                                      | UR                                            | UR                                                             | HR                                                    | UR                                              | LR                                          | LR                | 2                  |
| ROBERT,D<br>FAULKNER<br>et.al(1987)     | UR                                      | UR                                            | UR                                                             | HR                                                    | UR                                              | LR                                          | LR                | 2                  |

|                                        |    |    |    |    |    |    |    |   |
|----------------------------------------|----|----|----|----|----|----|----|---|
| Mitsuyoshi<br>Nakashima<br>et.al(1987) | UR | UR | UR | UR | UR | LR | LR | 2 |
| R. D. Faulkner<br>et.al(1988)          | LR | UR | UR | UR | UR | LR | UR | 2 |
| R. D.<br>Faulkneret.al(1988)           | UR | UR | UR | UR | UR | LR | LR | 2 |
| CARL ERIK<br>NORD et.al(1988)          | UR | UR | UR | UR | UR | LR | LR | 2 |
| Robert D. Faulkner<br>et.al(1988)      | LR | LR | UR | UR | UR | LR | LR | 4 |
| DANIEL P.<br>HEALY et,al(1989)         | LR | UR | UR | UR | UR | LR | LR | 3 |
| J. W. Stone<br>et.al(1989)             | UR | UR | UR | HR | UR | LR | LR | 2 |
| ROBERT D.<br>FAULKNER<br>et.al(1989)   | LR | LR | UR | UR | UR | LR | LR | 4 |
| D. Trenk et.al(1990)                   | UR | UR | UR | HR | UR | LR | LR | 2 |
| G. Montay<br>et.al(1991)               | LR | UR | UR | HR | UR | LR | LR | 3 |
| M. Dhib et.al(1991)                    | UR | UR | UR | HR | UR | LR | LR | 2 |



|                                    |    |    |    |    |    |    |    |   |
|------------------------------------|----|----|----|----|----|----|----|---|
| CHANTAL<br>DUVERNE<br>et.al(1992)  | LR | UR | UR | UR | UR | LR | LR | 3 |
| J. F. WESTPHAL<br>et.al(1993)      | UR | UR | UR | HR | UR | LR | LR | 2 |
| Milap C.Nahata<br>et.al(1993)      | UR | UR | UR | HR | UR | LR | LR | 2 |
| Katerina Mamzoridi<br>et.al(1996)  | UR | UR | UR | HR | UR | LR | LR | 2 |
| X.D. LIU<br>et.al(1997)            | UR | UR | UR | HR | UR | LR | LR | 2 |
| David E. Nix<br>et.al(1997)        | LR | UR | HR | HR | LR | LR | LR | 4 |
| YOSHIKIYO<br>TOYONAGA(1997)        | UR | UR | UR | HR | UR | LR | LR | 2 |
| H. CARSENTI-<br>ETESSE et.al(1998) | LR | UR | LR | UR | LR | LR | UR | 4 |
| E. Evene et.al(2001)               | LR | LR | HR | HR | UR | LR | LR | 4 |
| Takashi Deguchi<br>et.al(2003)     | UR | UR | UR | HR | UR | LR | LR | 2 |
| Y.A.Asiriet.al(2005)               | UR | UR | UR | HR | UR | LR | LR | 2 |
| Ping Liu et.al(2005)               | LR | UR | HR | HR | UR | LR | LR | 3 |

|                                      |    |    |    |    |    |    |    |   |
|--------------------------------------|----|----|----|----|----|----|----|---|
| Dong Hyun Choi<br>et.al(2007)        | LR | UR | UR | HR | UR | LR | LR | 3 |
| Parvin Zakeri-<br>Milani et.al(2008) | LR | UR | HR | HR | UR | LR | LR | 3 |
| Tawfeeg A.<br>Najjaet.al(2009)       | UR | UR | UR | HR | UR | LR | LR | 2 |
| Abbas Khan<br>et.al(2011)            | UR | UR | UR | HR | UR | LR | LR | 2 |
| Saiprasad Patil<br>et.al(2014)       | LR | LR | HR | HR | LR | LR | LR | 5 |
| Hossein Danafar<br>et.al(2016)       | LR | LR | UR | HR | LR | LR | LR | 5 |
| Lindley A. Barbee<br>et.al(2018)     | UR | UR | HR | HR | LR | LR | LR | 3 |
| Muhammad Waqas<br>Khadam et.al(2019) | UR | UR | UR | UR | UR | LR | LR | 2 |
| Sara Aset.al(2020)                   | LR | UR | UR | UR | LR | LR | LR | 4 |
| Esraa Ghazy Jabbar<br>et.al(2021)    | LR | LR | HR | HR | LR | LR | UR | 4 |
| Yuli Subiakt<br>et.al(2022)          | LR | LR | LR | UR | LR | LR | UR | 5 |

HR: high risk, LR: low risk, UR: unclear risk.

#### References:

- Abdullah A, Mutmainnah M, Wikantyasning ER. 2022. Cocrystals of Cefixime with Nicotinamide: Improved Solubility, Dissolution, and Permeability. *Indonesian Journal of Pharmacy*.
- Bayram E, Bayram MT, Hiz S, Turkmen M. 2012. Cefixime-induced oculogyric crisis. *Pediatric emergency care*. 28(1):55-56.
- Brogden RN, Campoli-Richards DM. 1989. Cefixime. *Drugs*. 38(4):524-550.
- Genvresse I, Carbon C. 1993. Cefixime. *International Journal of Antimicrobial Agents*. 3(1):1-16.
- Jabbar EG, Al-Tamimi D, Al-Mahroos M, Al-Tamimi Z, Ibraheem JJ. 2021. Pharmacokinetics and bioequivalence study of two formulations of Cefixime Suspension. *J Adv Pharm Edu Res*. 11(1):170-177.
- Leggett NJ, Caravaggio C, Rybak MJ. 1990. Cefixime. *Dicp*. 24(5):489-495.
- Naqvi I, Saleemi A, Naveed S. 2011. Cefixime: a drug as efficient corrosion inhibitor for mild steel in acidic media. *Electrochemical and thermodynamic studies*. *Int J Electrochem Sci*. 6(1):146-161.
- Özyüncü Ö, Beksac MS, Nemutlu E, Katlan D, Kir S. 2010. Maternal blood and amniotic fluid levels of moxifloxacin, levofloxacin and cefixime. *Journal of Obstetrics and Gynaecology Research*. 36(3):484-487.
